# Supplementary material for: Biochemical, Transcriptomic and Proteomic Analyses of Digestion in the Scorpion Tityus serrulatus: Insights into Function and Evolution of Digestion in an Ancient Arthropod
Source: PubMed Central journal article supplement (PMC4398375; doi:10.1371/journal.pone.0123841), 2015-04-15
Supplement: pone.0123841.s020.pdf [file pone.0123841.s020.pdf]

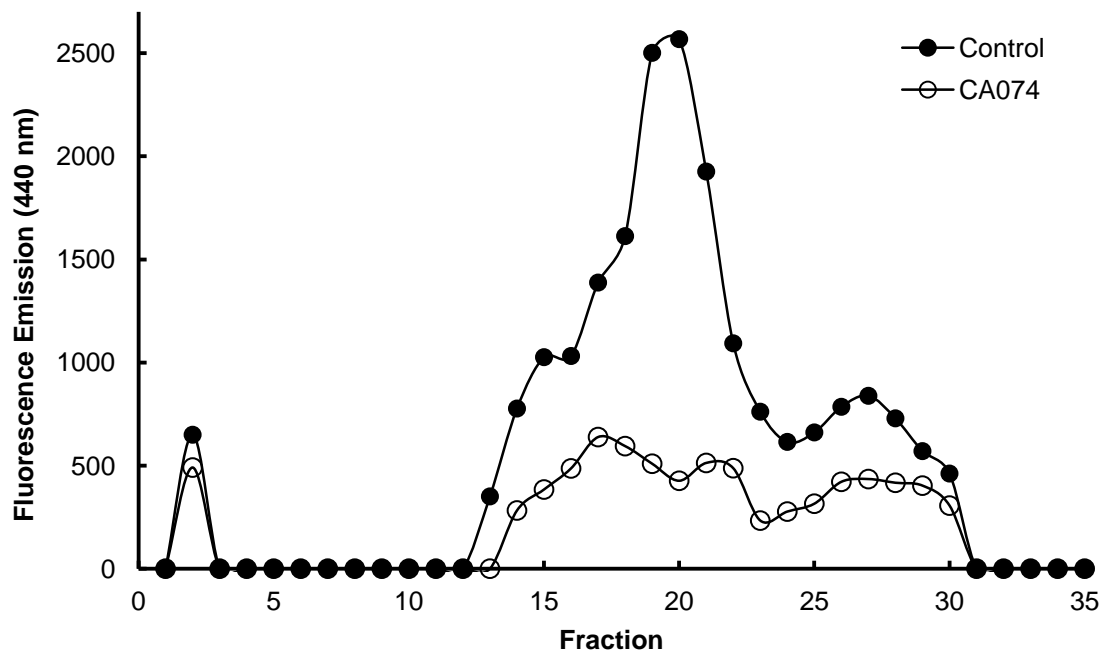

**Supplementary data 4:** CA-074 (10  $\mu$ M) inhibition in hydrophobic chromatographic fractioning of *Tityus serrulatus* MMG homogenate. Inhibitory and activity assays were performed as described in the methodology. Activity was measured using 10  $\mu$ M Z-FR-MCA in 0.1 M citrate-phosphate buffer pH 5.5.
