# Supplementary material for: Biochemical, Transcriptomic and Proteomic Analyses of Digestion in the Scorpion Tityus serrulatus: Insights into Function and Evolution of Digestion in an Ancient Arthropod
Source: PLoS One. 2015 Apr 15;10(4):e0123841. doi: 10.1371/journal.pone.0123841 (PMC4398375; doi:10.1371/journal.pone.0123841)
Supplement: S2 Table — (XLSX) [file pone.0123841.s011.xlsx]

## Sheet: Plan1
Condition	Read Pairs	Number of Contigs	Mean Length (bp)	N50 Length (bp)	BlastX Hits
Fasting	13834783	32249	797.5	1496	9857
Fed	12598159	27172	824.6	1499	9903
