# Supplementary material for: Biochemical, Transcriptomic and Proteomic Analyses of Digestion in the Scorpion Tityus serrulatus: Insights into Function and Evolution of Digestion in an Ancient Arthropod
Source: PLoS One. 2015 Apr 15;10(4):e0123841. doi: 10.1371/journal.pone.0123841 (PMC4398375; doi:10.1371/journal.pone.0123841)
Supplement: S3 Dataset — (XLSX) [file pone.0123841.s019.xlsx]

## Sheet: Supplementary data 1-peptide re
Search Engine: Mascot
	Version: 2.4.0
	Samples: All Samples
	Fragment Tolerance: 0.050 Da (Monoisotopic)
	Parent Tolerance: 0.050 Da (Monoisotopic)
	Fixed Modifications: +57 on C (Carbamidomethyl)
	Variable Modifications: +16 on M (Oxidation)
	Database: the Tityus2_ database (unknown version, 33793 entries)
	Digestion Enzyme: Trypsin
	Max Missed Cleavages: 1
Search Engine: X! Tandem
	Version: CYCLONE (2010.12.01.1)
	Samples: All Samples
	Fragment Tolerance: 0.050 Da (Monoisotopic)
	Parent Tolerance: 0.050 Da (Monoisotopic)
	Fixed Modifications: +57 on C (Carbamidomethyl)
	Variable Modifications: -18 on n (Glu->pyro-Glu), -17 on n (Ammonia-loss), -17 on n (Gln->pyro-Glu), +16 on M (Oxidation)
	Database: a subset of the Tityus2_ database
	Digestion Enzyme: Trypsin
	Max Missed Cleavages: 2
Protein Grouping Strategy: Experiment-wide grouping with binary peptide-protein weights
Peptide Thresholds: 95.0% minimum
Protein Thresholds: 99.0% minimum and 2 peptides minimum
Peptide FDR: 0.0% (Decoy)
Protein FDR: 0.5% (Decoy)
Biological sample name	Protein name	Protein accession numbers	Database sources	Protein molecular weight (Da)	Protein identification probability	Exclusive unique peptide count	Exclusive unique spectrum count	Exclusive spectrum count	Percentage of total spectra	Percentage sequence coverage	Peptide sequence	Previous amino acid	Next amino acid	Best Peptide identification probability	Best Mascot Ion score	Best Mascot Identity score	Best Mascot Delta Ion score	Best X! Tandem -log(e) score	Number of identified +1H spectra	Number of identified +2H spectra	Number of identified +3H spectra	Number of identified +4H spectra	Number of enzymatic termini	Calculated +1H Peptide Mass (AMU)	Median Retention Time	Total Precursor Intensity	Total TIC	Peptide start index	Peptide stop index	Star Category	Assigned	Other Proteins
Fed	Hemocyanin A chain	00606fasting_1_11060,29470fed_3_1831	Tityus2_.fasta	72.289,1	0.994	1	1	1	0.000617	0.0382	TNNVINTFLKEDELELSHSINVGR	R	Q	0.997	131	25	131	7.54	1	0	0	0	2	2742.41			160605	400	423	Empty	true
Fed	Adenosylhomocysteinase	30287fed_1_2899	Tityus2_.fasta	41.442,8	1	2	2	2	0.00123	0.0757	KLDEEVAALHLEHLNVK	K	L	0.997	106	25	103	10.8	1	0	0	0	2	1958.07			1192150	327	343	Empty	true
Fed	Adenosylhomocysteinase	30287fed_1_2899	Tityus2_.fasta	41.442,8	1	2	2	2	0.00123	0.0757	QYTIGVFFLPK	K	K	0.997	81.3	26	80.7	3.28	1	0	0	0	2	1312.73			258650	316	326	Empty	true
Fed	Hemocyanin F chain	10353fasting_2_29561	Tityus2_.fasta	71.568,2	1	14	15	19	0.0117	0.465	AMGFPFDR	R	V	0.997	49.7	27	43.2	0.602	1	0	0	0	2	9404346			1049980	592	599	Empty	true	10961fasting_2_31159
Fed	Hemocyanin F chain	10353fasting_2_29561	Tityus2_.fasta	71.568,2	1	14	15	19	0.0117	0.465	ASLHSYDEHDLDFPGVHIEHVTVNAK	K	V	0.997	157	25	157	15.5	1	0	0	0	2	2930.41			1130760	374	399	Empty	true
Fed	Hemocyanin F chain	10353fasting_2_29561	Tityus2_.fasta	71.568,2	1	14	15	19	0.0117	0.465	DATNSSVTISHVPTFDELKEGK	R	G	0.997	114	25	114	7.18	1	0	0	0	2	2375.17			1852330	499	520	Empty	true
Fed	Hemocyanin F chain	10353fasting_2_29561	Tityus2_.fasta	71.568,2	1	14	15	19	0.0117	0.465	FMDNMFQEYK	R	A	0.997	71.9	25	71.9	9.21	1	0	0	0	2	1352.57			592167	364	373	Empty	true
Fed	Hemocyanin F chain	10353fasting_2_29561	Tityus2_.fasta	71.568,2	1	14	15	19	0.0117	0.465	FRENPGVMSDTSTSLRDPIFYR	R	L	0.997	0	0	0	7.12	2	0	0	0	2	2604.25			1713020	339	360	Empty	true
Fed	Hemocyanin F chain	10353fasting_2_29561	Tityus2_.fasta	71.568,2	1	14	15	19	0.0117	0.465	FVPAETINHALK	R	A	0.997	35.8	26.1	35.8	2.09	1	0	0	0	2	1339.74			1377960	119	130	Empty	true
Fed	Hemocyanin F chain	10353fasting_2_29561	Tityus2_.fasta	71.568,2	1	14	15	19	0.0117	0.465	GVSEDNTEFCSCGWPSHMLLPR	K	G	0.997	181	25	181	12	1	0	0	0	2	2579.11			393162	521	542	Empty	true
Fed	Hemocyanin F chain	10353fasting_2_29561	Tityus2_.fasta	71.568,2	1	14	15	19	0.0117	0.465	GVTVPPIQEIFPDR	K	F	0.997	36.7	25.6	34	0.357	1	0	0	0	2	1567.85			702232	105	118	Empty	false	19977fed_1_12930,02750fasting_2_13777
Fed	Hemocyanin F chain	10353fasting_2_29561	Tityus2_.fasta	71.568,2	1	14	15	19	0.0117	0.465	IFLGPKYDELGNR	R	M	0.997	96.8	26.8	91.8	3.43	1	0	0	0	2	1521.81			1503730	457	469	Empty	false	19977fed_1_12930,02750fasting_2_13777
Fed	Hemocyanin F chain	10353fasting_2_29561	Tityus2_.fasta	71.568,2	1	14	15	19	0.0117	0.465	ILPLFEHLTSLTAK	R	Q	0.997	84.6	25	72.3	5.8	3	0	0	0	2	1582.92			802202	10	23	Empty	true
Fed	Hemocyanin F chain	10353fasting_2_29561	Tityus2_.fasta	71.568,2	1	14	15	19	0.0117	0.465	KGELFYYMHQQMCAR	R	Y	0.997	96.1	25	19.7	5.51	2	0	0	0	2	1961.88			2734730	194	208	Empty	false	10939fasting_3_31133,27819fed_3_26963,10961fasting_2_31159,04165fasting_1_16742,10999fasting_2_31207
Fed	Hemocyanin F chain	10353fasting_2_29561	Tityus2_.fasta	71.568,2	1	14	15	19	0.0117	0.465	LSTGLKRMTPFQ	R	N	0.961	0	0	0	0.886	2	0	0	0	1	1378.75			1288850	214	225	Empty	true
Fed	Hemocyanin F chain	10353fasting_2_29561	Tityus2_.fasta	71.568,2	1	14	15	19	0.0117	0.465	QVPVEDRDDRLKDVGHLER	K	G	0.967	0	0	0	1.31	1	0	0	0	2	2276.17			1939480	24	42	Empty	true
Fed	Hemocyanin F chain	10353fasting_2_29561	Tityus2_.fasta	71.568,2	1	14	15	19	0.0117	0.465	TPSQFATPNMSFTDIR	R	I	0.997	51.6	25	51.6	4.8	1	0	0	0	2	1812.86			218188	605	620	Empty	true
Fed	Hemocyanin F chain	10353fasting_2_29561	Tityus2_.fasta	71.568,2	1	14	15	19	0.0117	0.465	VLDAIHVGHVIDDHGHEIPLDEEHGIDILGSLLESSAESK	R	N	0.997	69.5	25	69.5	8.04	2	0	0	0	2	4296.14			458896	274	313	Empty	true
Fed	Hemocyanin F chain	10353fasting_2_29561	Tityus2_.fasta	71.568,2	1	14	15	19	0.0117	0.465	VPDVITTTMKEDVLQLSHGIK	K	T	0.997	124	25	118	8.54	1	0	0	0	2	2324.25			589044	400	420	Empty	true
Fed	Hemocyanin F chain	10353fasting_2_29561	Tityus2_.fasta	71.568,2	1	14	15	19	0.0117	0.465	YDCDRLSTGLKR	R	M	0.995	0	0	0	2.42	1	0	0	0	2	1483.73			1439570	209	220	Empty	true
Fed	MAM and LDL-receptor class A domain-containing protein C10orf112	23622fed_2_152	Tityus2_.fasta	580.276,3	1	31	31	32	0.0197	0.0884	ADRYCISNQR	R	K	0.997	24.1	26.9	22.8	1.74	1	0	0	0	2	1282.6			43.990,7	3950	3959	Empty	true
Fed	MAM and LDL-receptor class A domain-containing protein C10orf112	23622fed_2_152	Tityus2_.fasta	580.276,3	1	31	31	32	0.0197	0.0884	FIYMYNAQFGDR	K	S	0.997	61.5	25	61.5	4.21	1	0	0	0	2	1524.69			351369	1861	1872	Empty	true
Fed	MAM and LDL-receptor class A domain-containing protein C10orf112	23622fed_2_152	Tityus2_.fasta	580.276,3	1	31	31	32	0.0197	0.0884	FLNYWIK	K	S	0.988	21.2	27.5	12.3	0.638	1	0	0	0	2	9835349			434485	2273	2279	Empty	true
Fed	MAM and LDL-receptor class A domain-containing protein C10orf112	23622fed_2_152	Tityus2_.fasta	580.276,3	1	31	31	32	0.0197	0.0884	FRFFYTYSIPSFTHLR	K	Y	0.997	27.9	25	27.9	4	1	0	0	0	2	2082.06			331229	2979	2994	Empty	true
Fed	MAM and LDL-receptor class A domain-containing protein C10orf112	23622fed_2_152	Tityus2_.fasta	580.276,3	1	31	31	32	0.0197	0.0884	FWYFLQGK	R	H	0.997	16.7	28.8	13.3	0.62	1	0	0	0	2	1088.56			313835	239	246	Empty	true
Fed	MAM and LDL-receptor class A domain-containing protein C10orf112	23622fed_2_152	Tityus2_.fasta	580.276,3	1	31	31	32	0.0197	0.0884	GAEGVEAQLR	R	S	0.997	27.5	28.6	27	2.62	1	0	0	0	2	1029.53			308922	2957	2966	Empty	true
Fed	MAM and LDL-receptor class A domain-containing protein C10orf112	23622fed_2_152	Tityus2_.fasta	580.276,3	1	31	31	32	0.0197	0.0884	GDIAIDDISFTPACIPLYK	R	V	0.997	106	25	103	13.8	1	0	0	0	2	2109.06			85.957,9	3472	3490	Empty	true
Fed	MAM and LDL-receptor class A domain-containing protein C10orf112	23622fed_2_152	Tityus2_.fasta	580.276,3	1	31	31	32	0.0197	0.0884	GIAVDDIVLSK	R	Y	0.997	70.6	27	58	0.678	1	0	0	0	2	1129.65			2359400	2133	2143	Empty	true
Fed	MAM and LDL-receptor class A domain-containing protein C10orf112	23622fed_2_152	Tityus2_.fasta	580.276,3	1	31	31	32	0.0197	0.0884	GSIGDYWIR	K	S	0.997	75.2	28.5	71.2	4.05	1	0	0	0	2	1066.53			1010690	3866	3874	Empty	true
Fed	MAM and LDL-receptor class A domain-containing protein C10orf112	23622fed_2_152	Tityus2_.fasta	580.276,3	1	31	31	32	0.0197	0.0884	HSQRPPYIDR	R	T	0.997	56.8	27.7	45.1	5.59	2	0	0	0	2	1268.65			415870	2721	2730	Empty	true
Fed	MAM and LDL-receptor class A domain-containing protein C10orf112	23622fed_2_152	Tityus2_.fasta	580.276,3	1	31	31	32	0.0197	0.0884	IALISSTTFLPTFAK	R	D	0.997	86.5	25	76.7	5.36	1	0	0	0	2	1609.92			226245	3387	3401	Empty	true
Fed	MAM and LDL-receptor class A domain-containing protein C10orf112	23622fed_2_152	Tityus2_.fasta	580.276,3	1	31	31	32	0.0197	0.0884	IAQRTIKSEFNHTIIIE	K	G	0.984	9.01	37	7.22	0.824	1	0	0	0	1	2013.11			249013	131	147	Empty	true
Fed	MAM and LDL-receptor class A domain-containing protein C10orf112	23622fed_2_152	Tityus2_.fasta	580.276,3	1	31	31	32	0.0197	0.0884	IGPSYNSYIPSVGR	K	D	0.997	108	26.8	90.7	7.05	1	0	0	0	2	1509.77			835463	2926	2939	Empty	true
Fed	MAM and LDL-receptor class A domain-containing protein C10orf112	23622fed_2_152	Tityus2_.fasta	580.276,3	1	31	31	32	0.0197	0.0884	KEPFSLSFSR	R	V	0.997	58.2	27.1	35.5	1.57	1	0	0	0	2	1197.63			485472	3673	3682	Empty	true
Fed	MAM and LDL-receptor class A domain-containing protein C10orf112	23622fed_2_152	Tityus2_.fasta	580.276,3	1	31	31	32	0.0197	0.0884	LNFNVLIEGK	K	Q	0.997	79	27.2	54.3	2.64	1	0	0	0	2	1146.65			285485	3456	3465	Empty	true
Fed	MAM and LDL-receptor class A domain-containing protein C10orf112	23622fed_2_152	Tityus2_.fasta	580.276,3	1	31	31	32	0.0197	0.0884	LTVPLSVK	R	L	0.956	58	25	36.8	0	1	0	0	0	2	8565503			961134	3448	3455	Empty	true
Fed	MAM and LDL-receptor class A domain-containing protein C10orf112	23622fed_2_152	Tityus2_.fasta	580.276,3	1	31	31	32	0.0197	0.0884	LVTDMPLAYK	K	L	0.997	65.8	27.5	49.9	3.17	1	0	0	0	2	1150.62			1872050	451	460	Empty	true
Fed	MAM and LDL-receptor class A domain-containing protein C10orf112	23622fed_2_152	Tityus2_.fasta	580.276,3	1	31	31	32	0.0197	0.0884	QDQEGPWDIRWTTSTIFGQYYEK	R	V	0.997	51.1	25	49.7	4.18	1	0	0	0	2	2848.32			108632	3010	3032	Empty	true
Fed	MAM and LDL-receptor class A domain-containing protein C10orf112	23622fed_2_152	Tityus2_.fasta	580.276,3	1	31	31	32	0.0197	0.0884	SIFDDGPK	R	S	0.956	48.2	29.8	34.6	0	1	0	0	0	2	8784256			571826	45	52	Empty	true
Fed	MAM and LDL-receptor class A domain-containing protein C10orf112	23622fed_2_152	Tityus2_.fasta	580.276,3	1	31	31	32	0.0197	0.0884	SLDKYYIVIEAR	K	R	0.997	59.2	25.7	55.1	6.85	1	0	0	0	2	1469.8			384526	1940	1951	Empty	true
Fed	MAM and LDL-receptor class A domain-containing protein C10orf112	23622fed_2_152	Tityus2_.fasta	580.276,3	1	31	31	32	0.0197	0.0884	SNANLAVNKWTEFVSK	K	I	0.997	111	25.1	109	4.52	1	0	0	0	2	1807.93			725673	1592	1607	Empty	true
Fed	MAM and LDL-receptor class A domain-containing protein C10orf112	23622fed_2_152	Tityus2_.fasta	580.276,3	1	31	31	32	0.0197	0.0884	SPDYISWEWLDGSTSNPQTGPEFDHTFGTK	K	D	0.997	187	25	187	13.4	1	0	0	0	2	3399.51			386183	679	708	Empty	true
Fed	MAM and LDL-receptor class A domain-containing protein C10orf112	23622fed_2_152	Tityus2_.fasta	580.276,3	1	31	31	32	0.0197	0.0884	STGESPFNGEKPETDHTTNTVTGK	R	F	0.997	59	25	59	6.43	1	0	0	0	2	2534.16			2926730	1837	1860	Empty	true
Fed	MAM and LDL-receptor class A domain-containing protein C10orf112	23622fed_2_152	Tityus2_.fasta	580.276,3	1	31	31	32	0.0197	0.0884	TGLDTNFGEGPLNDHSLSSVQAHYMYAYLTGQEEKIYSR	R	L	0.997	25.6	25	25.6	6.82	1	0	0	0	2	4392.05			509938	2009	2047	Empty	true
Fed	MAM and LDL-receptor class A domain-containing protein C10orf112	23622fed_2_152	Tityus2_.fasta	580.276,3	1	31	31	32	0.0197	0.0884	TLPSPFSVDASWLR	R	V	0.997	81.2	26.6	78.2	2.54	1	0	0	0	2	1575.82			381623	337	350	Empty	true
Fed	MAM and LDL-receptor class A domain-containing protein C10orf112	23622fed_2_152	Tityus2_.fasta	580.276,3	1	31	31	32	0.0197	0.0884	TTISLWK	K	E	0.988	38.8	29.4	20.4	1.02	1	0	0	0	2	8484877			776005	262	268	Empty	true
Fed	MAM and LDL-receptor class A domain-containing protein C10orf112	23622fed_2_152	Tityus2_.fasta	580.276,3	1	31	31	32	0.0197	0.0884	VSGSESGSLFR	R	L	0.997	94	27.4	91.2	4.82	1	0	0	0	2	1125.55			576538	351	361	Empty	true
Fed	MAM and LDL-receptor class A domain-containing protein C10orf112	23622fed_2_152	Tityus2_.fasta	580.276,3	1	31	31	32	0.0197	0.0884	WTEFVSKIPENPNVASVQI	K	T	0.948	4.89	38.4	0.39	1.74	1	0	0	0	1	2158.12			2072910	1601	1619	Empty	true
Fed	MAM and LDL-receptor class A domain-containing protein C10orf112	23622fed_2_152	Tityus2_.fasta	580.276,3	1	31	31	32	0.0197	0.0884	YIFQAVMGK	R	S	0.997	57.1	28	48.2	1.42	1	0	0	0	2	1056.55			1107240	2461	2469	Empty	true
Fed	MAM and LDL-receptor class A domain-containing protein C10orf112	23622fed_2_152	Tityus2_.fasta	580.276,3	1	31	31	32	0.0197	0.0884	YSDYQGQGPLTIYTR	R	Q	0.997	113	25.4	113	13.5	1	0	0	0	2	1761.84			422330	2995	3009	Empty	true
Fed	MAM and LDL-receptor class A domain-containing protein C10orf112	23622fed_2_152	Tityus2_.fasta	580.276,3	1	31	31	32	0.0197	0.0884	YSNSIVPIWSEKGDEGDEWHAAQVSVTPTSSEPFR	K	Y	0.997	111	25	111	14.3	1	0	0	0	2	3905.83			705758	2426	2460	Empty	true
Fed	L-like cysteine peptidase 1	33787Fed_cathepsin	Tityus2_.fasta	21.742,8	1	4	4	4	0.00247	0.212	LVSLSEQNLVDCSQK	K	Q	0.997	124	25.5	0	6.52	1	0	0	0	2	1719.86			3383190	25	39	Empty	true
Fed	L-like cysteine peptidase 1	33787Fed_cathepsin	Tityus2_.fasta	21.742,8	1	4	4	4	0.00247	0.212	NSWGTSWGIK	K	G	0.997	52.7	28.6	51.8	1.43	1	0	0	0	2	1135.55			1115410	165	174	Empty	true
Fed	L-like cysteine peptidase 1	33787Fed_cathepsin	Tityus2_.fasta	21.742,8	1	4	4	4	0.00247	0.212	QSVGATCTGYVDVK	R	S	0.997	131	25.6	114	12.2	1	0	0	0	2	1484.71			3911950	83	96	Empty	true
Fed	L-like cysteine peptidase 1	33787Fed_cathepsin	Tityus2_.fasta	21.742,8	1	4	4	4	0.00247	0.212	TGKLVSLSEQNLVDCSQK	K	Q	0.997	69.4	25	69.4	5.57	1	0	0	0	2	2006.02			756929	22	39	Empty	true
Fed	Hemocyanin F chain	02750fasting_2_13777,19977fed_1_12930	Tityus2_.fasta	72.730,8	1	22	23	26	0.016	0.433	DFNDFIHLCEQAR	K	D	0.997	69.2	25	69.1	2.07	1	0	0	0	2	1664.75			747372	69	81	Empty	true
Fed	Hemocyanin F chain	02750fasting_2_13777,19977fed_1_12930	Tityus2_.fasta	72.730,8	1	22	23	26	0.016	0.433	DLKEVAVQDMER	R	W	0.997	102	27	91.1	6.8	3	0	0	0	2	1432.71			4980460	258	269	Empty	true
Fed	Hemocyanin F chain	02750fasting_2_13777,19977fed_1_12930	Tityus2_.fasta	72.730,8	1	22	23	26	0.016	0.433	DLKEVAVQDMERWRDR	R	I	0.997	0	0	0	3.59	1	0	0	0	2	2046.02			429504	258	273	Empty	true
Fed	Hemocyanin F chain	02750fasting_2_13777,19977fed_1_12930	Tityus2_.fasta	72.730,8	1	22	23	26	0.016	0.433	ELQPGKNTITR	K	K	0.997	30.3	26.2	29.7	3.03	1	0	0	0	2	1256.7			150395	488	498	Empty	true
Fed	Hemocyanin F chain	02750fasting_2_13777,19977fed_1_12930	Tityus2_.fasta	72.730,8	1	22	23	26	0.016	0.433	FIDNIFQDYK	R	D	0.997	44	27.4	41.9	3.35	1	0	0	0	2	1302.64			319005	364	373	Empty	true	10999fasting_2_31207
Fed	Hemocyanin F chain	02750fasting_2_13777,19977fed_1_12930	Tityus2_.fasta	72.730,8	1	22	23	26	0.016	0.433	FIPAETINAALK	R	A	0.997	51.5	26.1	40.2	0.721	1	0	0	0	2	1287.73			2818400	119	130	Empty	true
Fed	Hemocyanin F chain	02750fasting_2_13777,19977fed_1_12930	Tityus2_.fasta	72.730,8	1	22	23	26	0.016	0.433	FKENPGVMSDTSTSLRDPIFYR	R	W	0.997	62.1	39.1	0.46	8.39	1	0	0	0	2	2576.28			2369510	339	360	Empty	true
Fed	Hemocyanin F chain	02750fasting_2_13777,19977fed_1_12930	Tityus2_.fasta	72.730,8	1	22	23	26	0.016	0.433	GEGLSEDNTEFCSCGWPQHMLLPR	K	G	0.997	193	25	193	16.5	1	0	0	0	2	2820.22			501703	519	542	Empty	true
Fed	Hemocyanin F chain	02750fasting_2_13777,19977fed_1_12930	Tityus2_.fasta	72.730,8	1	22	23	26	0.016	0.433	GVTVPPIQEIFPDR	R	F	0.997	36.7	25.6	34	0.357	1	0	0	0	2	1567.85			702232	105	118	Empty	true	10353fasting_2_29561
Fed	Hemocyanin F chain	02750fasting_2_13777,19977fed_1_12930	Tityus2_.fasta	72.730,8	1	22	23	26	0.016	0.433	GVTVPPIQEIFPDRFIPAETINAALK	R	A	0.997	56.1	25	35.7	3.96	1	0	0	0	2	2836.56			832264	105	130	Empty	true
Fed	Hemocyanin F chain	02750fasting_2_13777,19977fed_1_12930	Tityus2_.fasta	72.730,8	1	22	23	26	0.016	0.433	HFFIELDKFHK	R	E	0.997	26.5	26.8	18.5	3.8	1	0	0	0	2	1460.77			1515410	477	487	Empty	true
Fed	Hemocyanin F chain	02750fasting_2_13777,19977fed_1_12930	Tityus2_.fasta	72.730,8	1	22	23	26	0.016	0.433	HFFIELDKFHKELQPGK	R	N	0.997	0	0	0	5.06	2	0	0	0	2	2113.12			2600020	477	493	Empty	true
Fed	Hemocyanin F chain	02750fasting_2_13777,19977fed_1_12930	Tityus2_.fasta	72.730,8	1	22	23	26	0.016	0.433	IFLGPKYDELGNR	R	L	0.997	96.8	26.8	91.8	3.43	1	0	0	0	2	1521.81			1503730	457	469	Empty	true	10353fasting_2_29561
Fed	Hemocyanin F chain	02750fasting_2_13777,19977fed_1_12930	Tityus2_.fasta	72.730,8	1	22	23	26	0.016	0.433	IIPLFEHLTSLTR	R	K	0.997	66.5	25	56	0.553	2	0	0	0	2	1539.89			1273520	10	22	Empty	true
Fed	Hemocyanin F chain	02750fasting_2_13777,19977fed_1_12930	Tityus2_.fasta	72.730,8	1	22	23	26	0.016	0.433	KLSVDERDPR	K	L	0.955	0	0	0	0.481	1	0	0	0	2	1214.65			131912	24	33	Empty	true
Fed	Hemocyanin F chain	02750fasting_2_13777,19977fed_1_12930	Tityus2_.fasta	72.730,8	1	22	23	26	0.016	0.433	KSDESSVTISHVPTVEELKK	R	G	0.997	0	0	0	11.6	1	0	0	0	2	2213.17			1867370	499	518	Empty	true
Fed	Hemocyanin F chain	02750fasting_2_13777,19977fed_1_12930	Tityus2_.fasta	72.730,8	1	22	23	26	0.016	0.433	MTPFHNFEEELEGYSPHLTSLISGLNYASRPSGLAMR	R	D	0.997	139	25	139	17.3	1	0	0	0	2	4183.99			126182	221	257	Empty	true
Fed	Hemocyanin F chain	02750fasting_2_13777,19977fed_1_12930	Tityus2_.fasta	72.730,8	1	22	23	26	0.016	0.433	NMSYTDVIIQFKEHVEQ	K	-	0.997	46	38	0	3.1	1	0	0	0	2	2081			428589	613	629	Empty	true
Fed	Hemocyanin F chain	02750fasting_2_13777,19977fed_1_12930	Tityus2_.fasta	72.730,8	1	22	23	26	0.016	0.433	SDESSVTISHVPTVEELKK	K	G	0.997	94.3	25	94.3	7.12	1	0	0	0	2	2085.07			804850	500	518	Empty	true
Fed	Hemocyanin F chain	02750fasting_2_13777,19977fed_1_12930	Tityus2_.fasta	72.730,8	1	22	23	26	0.016	0.433	TGPDSIYVEIK	R	E	0.997	104	28	94.9	5.43	1	0	0	0	2	1221.64			1998900	136	146	Empty	true
Fed	Hemocyanin F chain	02750fasting_2_13777,19977fed_1_12930	Tityus2_.fasta	72.730,8	1	22	23	26	0.016	0.433	TIADFVTK	R	N	0.997	45.1	28.4	36	0.658	1	0	0	0	2	8944932			1333370	605	612	Empty	true
Fed	Hemocyanin F chain	02750fasting_2_13777,19977fed_1_12930	Tityus2_.fasta	72.730,8	1	22	23	26	0.016	0.433	YDCDRLSVGLR	R	R	0.997	53.2	27	51.1	2.34	1	0	0	0	2	1353.66			1229560	209	219	Empty	true
Fed	Chloride intracellular channel exc-4	06408fasting_3_690	Tityus2_.fasta	29.819,4	1	2	2	2	0.00123	0.101	GQAILENEKIER	R	Y	0.997	59.1	26.3	51.3	1.68	1	0	0	0	2	1399.75			804030	86	97	Empty	true
Fed	Chloride intracellular channel exc-4	06408fasting_3_690	Tityus2_.fasta	29.819,4	1	2	2	2	0.00123	0.101	SNFDSTPPPILIDR	R	G	0.997	42.6	26.4	42.6	5.21	1	0	0	0	2	1571.81			341771	72	85	Empty	true
Fed	Fructose-bisphosphate aldolase	15743fasting_1_5361	Tityus2_.fasta	52.292,6	1	2	2	2	0.00123	0.0682	KYSPEDIAAATVTALQR	K	T	0.997	74.6	25	73.9	4.55	1	0	0	0	2	1833.97			258026	242	258	Empty	true
Fed	Fructose-bisphosphate aldolase	15743fasting_1_5361	Tityus2_.fasta	52.292,6	1	2	2	2	0.00123	0.0682	LANIGAENTEENRRR	R	F	0.963	0	0	0	1.26	1	0	0	0	2	1742.89			48.645,4	43	57	Empty	true
Fed	MAM and LDL-receptor class A domain-containing protein C10orf112	19500fed_1_12131	Tityus2_.fasta	73.429,4	1	4	4	4	0.00247	0.0469	DGWFAVLSGK	K	K	0.997	58.8	28.6	48.7	2.35	1	0	0	0	2	1079.55			496561	517	526	Empty	true
Fed	MAM and LDL-receptor class A domain-containing protein C10orf112	19500fed_1_12131	Tityus2_.fasta	73.429,4	1	4	4	4	0.00247	0.0469	DGWFAVLSGKK	K	A	0.997	42.2	27.7	41.2	4.19	1	0	0	0	2	1207.65			137706	517	527	Empty	true
Fed	MAM and LDL-receptor class A domain-containing protein C10orf112	19500fed_1_12131	Tityus2_.fasta	73.429,4	1	4	4	4	0.00247	0.0469	FLYFFGER	K	N	0.997	44.6	28.6	37	2.02	1	0	0	0	2	1078.54			1063280	297	304	Empty	true
Fed	MAM and LDL-receptor class A domain-containing protein C10orf112	19500fed_1_12131	Tityus2_.fasta	73.429,4	1	4	4	4	0.00247	0.0469	WTLQSGFSQLK	K	K	0.997	69.3	27.6	64.6	3.19	1	0	0	0	2	1294.68			295903	271	281	Empty	true
Fed	Superoxide dismutase [Cu-Zn]	06791fasting_3_99	Tityus2_.fasta	20.772,5	0.975	1	1	1	0.000617	0.099	VNISDSLITLYGPLSILGR	K	S	0.997	70	25	70	7.54	1	0	0	0	2	2031.15			69.135,1	155	173	Empty	true
Fed	40S ribosomal protein S4	23981fed_3_437	Tityus2_.fasta	30.314,0	0.975	1	1	1	0.000617	0.0446	DLAIETAIEAIP	R	-	0.997	43.9	27.5	25.1	1.74	1	0	0	0	2	1255.68			713991	258	269	Empty	true
Fed	Homogentisate 1,2-dioxygenase	23688fed_1_201	Tityus2_.fasta	52.511,1	1	3	3	3	0.00185	0.114	AGVAIADFVIFPPR	K	W	0.997	80	25.2	78	8.68	1	0	0	0	2	1472.83			131431	329	342	Empty	true
Fed	Homogentisate 1,2-dioxygenase	23688fed_1_201	Tityus2_.fasta	52.511,1	1	3	3	3	0.00185	0.114	GYILEVYDNHFILPNLGPIGANGLANPR	R	D	0.957	10.4	25	10.4	1.85	1	0	0	0	2	3037.59			18.293,3	199	226	Empty	true
Fed	Homogentisate 1,2-dioxygenase	23688fed_1_201	Tityus2_.fasta	52.511,1	1	3	3	3	0.00185	0.114	IRPSVVHSPFK	R	K	0.997	51.5	25	50	5.52	1	0	0	0	2	1266.73			707702	65	75	Empty	true
Fed	Uncharacterized protein C3H1.02c	06551fasting_2_800	Tityus2_.fasta	116.414,4	0.975	1	1	1	0.000617	0.00794	FYLPLFVR	R	L	0.997	37.4	25.4	22.9	2.11	1	0	0	0	2	1054.61			155269	574	581	Empty	true
Fed	Glucose dehydrogenase [acceptor]	24149fed_3_573	Tityus2_.fasta	46.011,6	1	1	1	1	0.000617	0.056	NLQDHVSTTALIFTIDQPYTLLK	K	S	0.997	55.3	25	55.3	4.74	1	0	0	0	2	2631.4			95.341,2	134	156	Empty	true
Fed	Zinc finger CCCH-type with G patch domain-containing protein	02385fasting_2_13173	Tityus2_.fasta	59.777,7	0.898	1	1	1	0.000617	0.0135	KDLLTLK	R	S	0.988	69.8	29.5	20	2.14	1	0	0	0	2	8305348			896342	44	50	Empty	true
Fed	Catalase	06540fasting_3_79	Tityus2_.fasta	62.484,5	1	3	3	3	0.00185	0.0866	AAELSGSDPDYSIRDLYNAIR	K	S	0.997	96.8	25	96.8	5.92	1	0	0	0	2	2326.13			847109	283	303	Empty	true	24000fed_2_451
Fed	Catalase	06540fasting_3_79	Tityus2_.fasta	62.484,5	1	3	3	3	0.00185	0.0866	FSTVGGESGSADTVRDPR	R	G	0.997	43.4	25	30.8	2.12	1	0	0	0	2	1837.87			1461960	109	126	Empty	true
Fed	Catalase	06540fasting_3_79	Tityus2_.fasta	62.484,5	1	3	3	3	0.00185	0.0866	WNPFDLTK	R	I	0.997	43.4	29.2	33.9	3.38	1	0	0	0	2	1020.51			226975	327	334	Empty	true	24000fed_2_451
Fed	Heat shock cognate 71 kDa protein	23592fed_1_123	Tityus2_.fasta	75.580,3	1	3	3	3	0.00185	0.0582	ARFEELNADLFR	R	G	0.997	50.1	26.9	32.6	2.89	1	0	0	0	2	1480.75			429253	300	311	Empty	true	30901fed_3_3814,14712fasting_3_3820
Fed	Heat shock cognate 71 kDa protein	23592fed_1_123	Tityus2_.fasta	75.580,3	1	3	3	3	0.00185	0.0582	DSGTIAGLNVLR	K	I	0.997	95.1	27.2	91.2	3.41	1	0	0	0	2	1215.67			778965	160	171	Empty	true	30901fed_3_3814,14712fasting_3_3820
Fed	Heat shock cognate 71 kDa protein	23592fed_1_123	Tityus2_.fasta	75.580,3	1	3	3	3	0.00185	0.0582	STAGDTHLGGEDFDNR	K	M	0.997	114	25	114	6.28	1	0	0	0	2	1691.73			1323810	221	236	Empty	true	30901fed_3_3814,14712fasting_3_3820
Fed	Ras-related protein Rab-1A	05685fasting_3_142	Tityus2_.fasta	22.763,6	1	2	2	2	0.00123	0.17	LLLIGDSGVGK	K	S	0.997	61	26.2	0	0	1	0	0	0	2	1071.64			542237	14	24	Empty	true
Fed	Ras-related protein Rab-1A	05685fasting_3_142	Tityus2_.fasta	22.763,6	1	2	2	2	0.00123	0.17	VVDYTTAKEFADQLGIPFLETSAK	K	N	0.997	108	25	108	13.9	1	0	0	0	2	2643.36			118434	133	156	Empty	true
Fed	Hemocyanin B chain	10939fasting_3_31133	Tityus2_.fasta	73.668,1	1	9	10	11	0.00679	0.213	FIDDMFQEYKK	R	T	0.997	86	26.6	84.3	6.26	1	0	0	0	2	1463.69			1261050	367	377	Empty	true
Fed	Hemocyanin B chain	10939fasting_3_31133	Tityus2_.fasta	73.668,1	1	9	10	11	0.00679	0.213	FVPIETLLK	K	A	0.997	49.2	25	41.3	2.92	1	0	0	0	2	1059.64			919669	122	130	Empty	true
Fed	Hemocyanin B chain	10939fasting_3_31133	Tityus2_.fasta	73.668,1	1	9	10	11	0.00679	0.213	IFLAPKFDELGNEIEANELR	R	R	0.997	71.1	25	67	8.68	1	0	0	0	2	2318.2			167296	463	482	Empty	true
Fed	Hemocyanin B chain	10939fasting_3_31133	Tityus2_.fasta	73.668,1	1	9	10	11	0.00679	0.213	IFLAPKFDELGNEIEANELRR	R	L	0.997	0	0	0	8.54	1	0	0	0	2	2474.3			768756	463	483	Empty	true
Fed	Hemocyanin B chain	10939fasting_3_31133	Tityus2_.fasta	73.668,1	1	9	10	11	0.00679	0.213	ILDSIHLATVIDKHGK	R	G	0.997	67.7	25	65.9	3.92	1	0	0	0	2	1760.01			987370	277	292	Empty	true
Fed	Hemocyanin B chain	10939fasting_3_31133	Tityus2_.fasta	73.668,1	1	9	10	11	0.00679	0.213	KGELFYYMHQQMCAR	R	Y	0.997	96.1	25	19.7	5.51	2	0	0	0	2	1961.88			2734730	197	211	Empty	false	10353fasting_2_29561,27819fed_3_26963,10961fasting_2_31159,04165fasting_1_16742,10999fasting_2_31207
Fed	Hemocyanin B chain	10939fasting_3_31133	Tityus2_.fasta	73.668,1	1	9	10	11	0.00679	0.213	LASMHDDKEEVIVQSEK	K	T	0.997	108	25.1	98	11.6	3	0	0	0	2	1957.95			3089050	134	150	Empty	true
Fed	Hemocyanin B chain	10939fasting_3_31133	Tityus2_.fasta	73.668,1	1	9	10	11	0.00679	0.213	LEGLGILGR	R	G	0.997	57.3	25.5	42.4	0.62	1	0	0	0	2	9275624			390959	37	45	Empty	true
Fed	Hemocyanin B chain	10939fasting_3_31133	Tityus2_.fasta	73.668,1	1	9	10	11	0.00679	0.213	LLPLFQYVPLLTK	R	E	0.997	72.3	25	71.6	8.52	1	0	0	0	2	1544.95			255777	12	24	Empty	true
Fed	Hemocyanin B chain	10939fasting_3_31133	Tityus2_.fasta	73.668,1	1	9	10	11	0.00679	0.213	LMVELDKFSTELEPGVNTIEHSSR	R	D	0.997	145	25	145	11.7	1	0	0	0	2	2731.36			222306	484	507	Empty	true
Fed	Lysosomal alpha-glucosidase	18167fed_3_10667	Tityus2_.fasta	107.750,2	0.975	1	1	1	0.000617	0.0149	LNPFNLLVVLDDDR	R	S	0.997	74.4	25.3	64	2	1	0	0	0	2	1642.88			91.613,0	829	842	Empty	true
Fed	Peroxiredoxin-4	16369fasting_1_6476	Tityus2_.fasta	27.261,5	1	2	2	2	0.00123	0.095	GLFIIDNKGILR	R	Q	0.997	37.6	25	20.7	0.886	1	0	0	0	2	1358.82			466320	171	182	Empty	true
Fed	Peroxiredoxin-4	16369fasting_1_6476	Tityus2_.fasta	27.261,5	1	2	2	2	0.00123	0.095	QITMNDLPVGR	R	S	0.994	52.7	37.3	24	0	1	0	0	0	2	1225.69			525881	183	193	Empty	true
Fed	Hemocyanin II	10999fasting_2_31207	Tityus2_.fasta	72.662,2	1	18	18	18	0.0111	0.532	ASTKPAGDESPIVVDVK	K	E	0.997	71.3	25.5	63.1	7.07	1	0	0	0	2	1712.91			1772860	134	150	Empty	true
Fed	Hemocyanin II	10999fasting_2_31207	Tityus2_.fasta	72.662,2	1	18	18	18	0.0111	0.532	EQLSFPGVDVVDIR	K	V	0.997	68.2	26.4	55.6	4.74	1	0	0	0	2	1573.82			1079910	386	399	Empty	true
Fed	Hemocyanin II	10999fasting_2_31207	Tityus2_.fasta	72.662,2	1	18	18	18	0.0111	0.532	ETGNIFDPEYNLAYFREDVGINAHHWHWHLVYPATWNAAYFGK	K	E	0.974	8.73	25	8.73	3.44	1	0	0	0	2	5149.42			108572	151	193	Empty	true
Fed	Hemocyanin II	10999fasting_2_31207	Tityus2_.fasta	72.662,2	1	18	18	18	0.0111	0.532	EVALDEEHGADILGDLIESSYESK	K	N	0.997	122	25	122	9.62	1	0	0	0	2	2619.23			349608	294	317	Empty	true
Fed	Hemocyanin II	10999fasting_2_31207	Tityus2_.fasta	72.662,2	1	18	18	18	0.0111	0.532	EYTFEELER	R	G	0.997	40.5	25	35.7	2	1	0	0	0	2	1215.55			704201	516	524	Empty	true
Fed	Hemocyanin II	10999fasting_2_31207	Tityus2_.fasta	72.662,2	1	18	18	18	0.0111	0.532	FIDNIFQDYK	R	A	0.997	44	27.4	41.9	3.35	1	0	0	0	2	1302.64			319005	368	377	Empty	false	19977fed_1_12930,02750fasting_2_13777
Fed	Hemocyanin II	10999fasting_2_31207	Tityus2_.fasta	72.662,2	1	18	18	18	0.0111	0.532	FIDNIFQDYKATLPLYTK	R	E	0.997	22.6	25	22.6	2.22	1	0	0	0	2	2190.15			436114	368	385	Empty	true
Fed	Hemocyanin II	10999fasting_2_31207	Tityus2_.fasta	72.662,2	1	18	18	18	0.0111	0.532	FVPAATMAEILSK	R	A	0.997	90.2	27.4	82.4	4.64	1	0	0	0	2	1377.74			846616	121	133	Empty	true
Fed	Hemocyanin II	10999fasting_2_31207	Tityus2_.fasta	72.662,2	1	18	18	18	0.0111	0.532	GLSVPPIQQIFPER	K	F	0.997	60.3	25	43.7	2.02	1	0	0	0	2	1580.88			381903	107	120	Empty	true
Fed	Hemocyanin II	10999fasting_2_31207	Tityus2_.fasta	72.662,2	1	18	18	18	0.0111	0.532	HLSLATVGGEVPHEQR	K	D	0.997	88.9	25.3	88.2	10.6	1	0	0	0	2	1729.9			698858	16	31	Empty	true
Fed	Hemocyanin II	10999fasting_2_31207	Tityus2_.fasta	72.662,2	1	18	18	18	0.0111	0.532	HLYEVFYEAKDFDDFVHLAQEAR	R	T	0.997	175	25	175	19.9	1	0	0	0	2	2842.35			373993	61	83	Empty	true
Fed	Hemocyanin II	10999fasting_2_31207	Tityus2_.fasta	72.662,2	1	18	18	18	0.0111	0.532	IFLAPKYDELGNVIPPNELR	R	R	0.997	42	25	42	2.92	1	0	0	0	2	2298.25			293216	463	482	Empty	true
Fed	Hemocyanin II	10999fasting_2_31207	Tityus2_.fasta	72.662,2	1	18	18	18	0.0111	0.532	IFLAPKYDELGNVIPPNELRR	R	L	0.997	0	0	0	15.2	1	0	0	0	2	2454.35			275312	463	483	Empty	true
Fed	Hemocyanin II	10999fasting_2_31207	Tityus2_.fasta	72.662,2	1	18	18	18	0.0111	0.532	IIDAIHLGHIEDAHGK	R	E	0.997	85.5	25	85.3	4.08	1	0	0	0	2	1738.92			1125280	278	293	Empty	true
Fed	Hemocyanin II	10999fasting_2_31207	Tityus2_.fasta	72.662,2	1	18	18	18	0.0111	0.532	KGELFYYMHQQMCAR	R	Y	0.997	96.1	25	19.7	5.51	2	0	0	0	2	1961.88			2734730	198	212	Empty	false	10353fasting_2_29561,10939fasting_3_31133,27819fed_3_26963,10961fasting_2_31159,04165fasting_1_16742
Fed	Hemocyanin II	10999fasting_2_31207	Tityus2_.fasta	72.662,2	1	18	18	18	0.0111	0.532	LADLAFSVHPGEIFSCFHPDHLEDAR	R	H	0.997	128	25	128	15.6	1	0	0	0	2	2980.4			282093	35	60	Empty	true
Fed	Hemocyanin II	10999fasting_2_31207	Tityus2_.fasta	72.662,2	1	18	18	18	0.0111	0.532	LCIEMDKFKTELTPGTNTVVR	R	N	0.976	15.7	38.9	1.09	2.74	1	0	0	0	2	2452.22			190872	484	504	Empty	true
Fed	Hemocyanin II	10999fasting_2_31207	Tityus2_.fasta	72.662,2	1	18	18	18	0.0111	0.532	MVPFHNFDEELEGYAPHLSHLSSGR	R	Y	0.997	75.8	25	75.8	8.14	1	0	0	0	2	2869.34			494146	225	249	Empty	true
Fed	Hemocyanin II	10999fasting_2_31207	Tityus2_.fasta	72.662,2	1	18	18	18	0.0111	0.532	NSVDSSVALSR	R	E	0.997	61.6	28.5	61.6	2.68	1	0	0	0	2	1134.57			760390	505	515	Empty	true
Fed	Hemocyanin II	10999fasting_2_31207	Tityus2_.fasta	72.662,2	1	18	18	18	0.0111	0.532	YYASRPAGLK	R	L	0.997	39.3	27.2	31.5	4	1	0	0	0	2	1125.61			167011	250	259	Empty	true
Fed	Protein disulfide-isomerase	23262fed_2_20592	Tityus2_.fasta	64.616,3	0.975	1	1	1	0.000617	0.0265	IGPAAESLDTVESAK	K	A	0.997	87.8	26	82.4	5.07	1	0	0	0	2	1487.76			405399	165	179	Empty	true
Fed	Hemocyanin AA6 chain	04165fasting_1_16742,27819fed_3_26963	Tityus2_.fasta	71.668,1	1	27	29	35	0.0216	0.613	DAIYPDKKPMGFPFDRPIHVR	K	N	0.997	78.3	25	78.3	5.82	1	0	0	0	2	2515.29			1455000	584	604	Empty	true
Fed	Hemocyanin AA6 chain	04165fasting_1_16742,27819fed_3_26963	Tityus2_.fasta	71.668,1	1	27	29	35	0.0216	0.613	DFDDFYLLAK	K	Q	0.997	46.4	26.9	46	2.03	1	0	0	0	2	1246.6			417146	69	78	Empty	true
Fed	Hemocyanin AA6 chain	04165fasting_1_16742,27819fed_3_26963	Tityus2_.fasta	71.668,1	1	27	29	35	0.0216	0.613	DLDEATKLYEILYHAK	K	D	0.997	108	25.1	108	3.96	1	0	0	0	2	1921.99			306704	53	68	Empty	true
Fed	Hemocyanin AA6 chain	04165fasting_1_16742,27819fed_3_26963	Tityus2_.fasta	71.668,1	1	27	29	35	0.0216	0.613	DLDEATKLYEILYHAKDFDDFYLLAK	K	Q	0.997	0	0	0	14.5	1	0	0	0	2	3149.57			2087620	53	78	Empty	true
Fed	Hemocyanin AA6 chain	04165fasting_1_16742,27819fed_3_26963	Tityus2_.fasta	71.668,1	1	27	29	35	0.0216	0.613	DLKDVDVQDMER	R	W	0.997	83.2	25.8	69.3	2.96	2	0	0	0	2	1462.68			2418180	257	268	Empty	true
Fed	Hemocyanin AA6 chain	04165fasting_1_16742,27819fed_3_26963	Tityus2_.fasta	71.668,1	1	27	29	35	0.0216	0.613	EANNNPNSDVVVEVEETGNILDPEYK	K	L	0.997	63.5	25	63.5	7.36	1	0	0	0	2	2888.34			179712	131	156	Empty	true
Fed	Hemocyanin AA6 chain	04165fasting_1_16742,27819fed_3_26963	Tityus2_.fasta	71.668,1	1	27	29	35	0.0216	0.613	ENPGVMSDTSTSLRDPIFYR	N	W	0.997	80.4	25	80.4	7.43	1	0	0	0	1	2285.09			1950500	340	359	Empty	true	10353fasting_2_29561,19977fed_1_12930,10337fasting_2_29538,02750fasting_2_13777,29086fed_2_1376
Fed	Hemocyanin AA6 chain	04165fasting_1_16742,27819fed_3_26963	Tityus2_.fasta	71.668,1	1	27	29	35	0.0216	0.613	EQIDFPGVEVTNVTVNAK	R	K	0.997	102	25	102	7.12	1	0	0	0	2	1960			383576	381	398	Empty	true
Fed	Hemocyanin AA6 chain	04165fasting_1_16742,27819fed_3_26963	Tityus2_.fasta	71.668,1	1	27	29	35	0.0216	0.613	FNENPGVMSDTSTSLRDPIFYR	R	W	0.997	81.4	25	77.5	7.7	2	0	0	0	2	2546.2			1926590	338	359	Empty	true
Fed	Hemocyanin AA6 chain	04165fasting_1_16742,27819fed_3_26963	Tityus2_.fasta	71.668,1	1	27	29	35	0.0216	0.613	FVDNIFQDYK	R	A	0.997	74.8	27.5	67.8	6.54	1	0	0	0	2	1288.62			1976930	363	372	Empty	true
Fed	Hemocyanin AA6 chain	04165fasting_1_16742,27819fed_3_26963	Tityus2_.fasta	71.668,1	1	27	29	35	0.0216	0.613	FVDNIFQDYKATLHPYTR	R	E	0.997	136	25	136	10.2	1	0	0	0	2	2228.11			758972	363	380	Empty	true
Fed	Hemocyanin AA6 chain	04165fasting_1_16742,27819fed_3_26963	Tityus2_.fasta	71.668,1	1	27	29	35	0.0216	0.613	FVPAETVNLAIK	R	E	0.997	71.4	25.6	59.5	2.96	1	0	0	0	2	1301.75			1548010	119	130	Empty	true
Fed	Hemocyanin AA6 chain	04165fasting_1_16742,27819fed_3_26963	Tityus2_.fasta	71.668,1	1	27	29	35	0.0216	0.613	GVTVPPIQEVFPDR	K	F	0.997	60.7	25.3	50.3	1.37	1	0	0	0	2	1553.83			399209	105	118	Empty	true
Fed	Hemocyanin AA6 chain	04165fasting_1_16742,27819fed_3_26963	Tityus2_.fasta	71.668,1	1	27	29	35	0.0216	0.613	GVTVPPIQEVFPDRFVPAETVNLAIK	K	E	0.997	60.4	25	36.5	1.49	1	0	0	0	2	2836.56			409899	105	130	Empty	true
Fed	Hemocyanin AA6 chain	04165fasting_1_16742,27819fed_3_26963	Tityus2_.fasta	71.668,1	1	27	29	35	0.0216	0.613	IFLGPKFDELGNVLDVNEQR	R	R	0.997	62.9	25	62.9	7.01	1	0	0	0	2	2303.2			718967	458	477	Empty	true
Fed	Hemocyanin AA6 chain	04165fasting_1_16742,27819fed_3_26963	Tityus2_.fasta	71.668,1	1	27	29	35	0.0216	0.613	IFLGPKFDELGNVLDVNEQRR	R	L	0.997	0	0	0	7.6	1	0	0	0	2	2459.3			275322	458	478	Empty	true
Fed	Hemocyanin AA6 chain	04165fasting_1_16742,27819fed_3_26963	Tityus2_.fasta	71.668,1	1	27	29	35	0.0216	0.613	ILDAIHLGHIHTSEDEEIALDEAHGADILGDIIESSAESR	R	N	0.997	103	25	103	8.19	2	0	0	0	2	4292.1			352720	273	312	Empty	true
Fed	Hemocyanin AA6 chain	04165fasting_1_16742,27819fed_3_26963	Tityus2_.fasta	71.668,1	1	27	29	35	0.0216	0.613	ILSLFEHLTSLTEK	R	Q	0.997	101	25	85.4	3.72	2	0	0	0	2	1630.91			1212240	10	23	Empty	true
Fed	Hemocyanin AA6 chain	04165fasting_1_16742,27819fed_3_26963	Tityus2_.fasta	71.668,1	1	27	29	35	0.0216	0.613	ILSLFEHLTSLTEKQLAPEDRDPR	R	L	0.962	0	0	0	3.92	2	0	0	0	2	2808.49			770957	10	33	Empty	true
Fed	Hemocyanin AA6 chain	04165fasting_1_16742,27819fed_3_26963	Tityus2_.fasta	71.668,1	1	27	29	35	0.0216	0.613	KGELFYYMHQQMCAR	R	Y	0.997	96.1	25	19.7	5.51	2	0	0	0	2	1961.88			2734730	193	207	Empty	true	10353fasting_2_29561,10939fasting_3_31133,10961fasting_2_31159,10999fasting_2_31207
Fed	Hemocyanin AA6 chain	04165fasting_1_16742,27819fed_3_26963	Tityus2_.fasta	71.668,1	1	27	29	35	0.0216	0.613	KNNTIHTFIKDEELELSHGIR	K	F	0.997	0	0	0	13.9	1	0	0	0	2	2494.31			810347	399	419	Empty	true
Fed	Hemocyanin AA6 chain	04165fasting_1_16742,27819fed_3_26963	Tityus2_.fasta	71.668,1	1	27	29	35	0.0216	0.613	LAGVGILKR	R	G	0.997	48.7	25	41.7	2.21	1	0	0	0	2	9266147			715929	34	42	Empty	true
Fed	Hemocyanin AA6 chain	04165fasting_1_16742,27819fed_3_26963	Tityus2_.fasta	71.668,1	1	27	29	35	0.0216	0.613	LLCQDAVSYCGAK	K	D	0.997	74	25.1	66.1	4.15	1	0	0	0	2	1484.69			1480750	571	583	Empty	true
Fed	Hemocyanin AA6 chain	04165fasting_1_16742,27819fed_3_26963	Tityus2_.fasta	71.668,1	1	27	29	35	0.0216	0.613	MIPFHNFDEKLEGYAPHLTSLISGLQYGSRPR	R	G	0.997	105	25	105	8.6	1	0	0	0	2	3689.85			298997	220	251	Empty	true
Fed	Hemocyanin AA6 chain	04165fasting_1_16742,27819fed_3_26963	Tityus2_.fasta	71.668,1	1	27	29	35	0.0216	0.613	NLQEFLTPNIHVTDIDIK	R	F	0.997	45.8	25	45.8	6.47	1	0	0	0	2	2110.12			453770	605	622	Empty	true
Fed	Hemocyanin AA6 chain	04165fasting_1_16742,27819fed_3_26963	Tityus2_.fasta	71.668,1	1	27	29	35	0.0216	0.613	NLQEFLTPNIHVTDIDIKFDG	R	-	0.997	56.1	25	56.1	5.41	2	0	0	0	2	2429.24			279363	605	625	Empty	true
Fed	Hemocyanin AA6 chain	04165fasting_1_16742,27819fed_3_26963	Tityus2_.fasta	71.668,1	1	27	29	35	0.0216	0.613	NQEFYGSLHNWGHVLMAR	R	I	0.997	81.2	25	81.2	7.2	2	0	0	0	2	2159.02			1863450	313	330	Empty	true
Fed	Enolase	05790fasting_1_223	Tityus2_.fasta	46.566,3	0.975	1	1	1	0.000617	0.0508	SGETEDSTIADLVVGLGTGQIK	R	T	0.997	80.3	25	80.3	13.1	1	0	0	0	2	2190.11			74.152,8	374	395	Empty	true
Fed	Profilin-5	26419fed_1_24575	Tityus2_.fasta	14.334,5	1	2	2	3	0.00185	0.121	DANTKPVTQQELK	K	T	0.997	32.6	26.7	24.8	0.854	1	0	0	0	2	1471.78			29.619,4	37	49	Empty	true
Fed	Profilin-5	26419fed_1_24575	Tityus2_.fasta	14.334,5	1	2	2	3	0.00185	0.121	YEKDANTKPVTQQELK	K	T	0.997	68.1	25.2	63.3	6.89	2	0	0	0	2	1891.98			456434	34	49	Empty	true
Fed	Alpha-L-fucosidase	14426fasting_1_3432	Tityus2_.fasta	56.063,4	0.975	1	1	1	0.000617	0.0168	IIPVFEER	R	L	0.997	37.3	29.1	23.5	1.85	1	0	0	0	2	1002.56			345741	351	358	Empty	true
Fed	4-hydroxyphenylpyruvate dioxygenase	06743fasting_3_959	Tityus2_.fasta	14.828,9	0.975	1	1	1	0.000617	0.102	ALFEAIELDQAQR	K	G	0.997	73.7	27.1	71.6	7.77	1	0	0	0	2	1503.78			402516	113	125	Empty	true
Fed	Ras-related protein Rab-5C	10772fasting_3_30946,30136fed_2_2672	Tityus2_.fasta	23.373,4	0.975	1	1	1	0.000617	0.0651	TAMNVNDIFLAIAK	K	K	0.997	80.1	26.3	80.1	6.7	1	0	0	0	2	1520.81			64.648,9	166	179	Empty	true
Fed	Actin, clone 403	00504fasting_1_10966	Tityus2_.fasta	41.905,7	0.99	1	1	1	0.000617	0.0424	SYELPDGQVITIGNER	K	F	0.997	114	25.7	113	9.49	1	0	0	0	2	1790.89			309981	240	255	Empty	true	29291fed_1_1620
Fed	23666fed_2_19-DECOY Calreticulin	23666fed_2_19-DECOY		0,0	0.998	2	2	2	0.00123	0	QEDKMKREADK	D	T	0.947	0	0	0	1.18	1	0	0	0	1	1360.65			1922680	0	0	Empty	true
Fed	23666fed_2_19-DECOY Calreticulin	23666fed_2_19-DECOY		0,0	0.998	2	2	2	0.00123	0	TSGWTEEGVK	K	Q	0.959	0	0	0	2.37	1	0	0	0	2	1093.52			37.697,2	0	0	Empty	true
Fed	Focal adhesion kinase 1	26084fed_1_23351	Tityus2_.fasta	119.288,9	1	1	1	1	0.000617	0.0125	NDSPITKYSSIPR	R	K	0.997	32.5	25.8	32.5	0.699	1	0	0	0	2	1477.76			1608370	327	339	Empty	true
Fed	Calreticulin	06327fasting_1_621	Tityus2_.fasta	31.059,4	0.975	1	1	1	0.000617	0.202	CKDDVYSHLYTLIVKPDNTYVVK	R	I	0.997	74.9	25	74.9	12.6	1	0	0	0	2	2770.41			166276	163	185	Empty	false	23666fed_2_19
Fed	Calreticulin	06327fasting_1_621	Tityus2_.fasta	31.059,4	0.975	1	1	1	0.000617	0.202	FYGDAEKDKGIQTSQDAR	K	F	0.997	0	0	0	7.77	2	0	0	0	2	2028.96			5080750	56	73	Empty	false	23666fed_2_19
Fed	Calreticulin	06327fasting_1_621	Tityus2_.fasta	31.059,4	0.975	1	1	1	0.000617	0.202	WIPSEHKGNELGK	R	F	0.997	44.2	26.7	39.1	1.96	1	0	0	0	2	1494.77			527943	36	48	Empty	true
Fed	Calreticulin	23666fed_2_19	Tityus2_.fasta	43.288,8	1	5	5	6	0.0037	0.245	CKDDVYSHLYTLIVKPDNTYVVK	R	I	0.997	74.9	25	74.9	12.6	1	0	0	0	2	2770.41			166276	126	148	Empty	true	06327fasting_1_621
Fed	Calreticulin	23666fed_2_19	Tityus2_.fasta	43.288,8	1	5	5	6	0.0037	0.245	FYGDAEKDKGIQTSQDAR	K	F	0.997	0	0	0	7.77	2	0	0	0	2	2028.96			5080750	19	36	Empty	true	06327fasting_1_621
Fed	Calreticulin	23666fed_2_19	Tityus2_.fasta	43.288,8	1	5	5	6	0.0037	0.245	GPWIHPEIDNPEYVPDPFIYR	K	F	0.997	39	25	39	3.57	1	0	0	0	2	2554.24			240393	250	270	Empty	true
Fed	Calreticulin	23666fed_2_19	Tityus2_.fasta	43.288,8	1	5	5	6	0.0037	0.245	SGTIFDNVLITDDEDFAQK	K	V	0.997	111	25	106	7.41	1	0	0	0	2	2128.01			229422	286	304	Empty	true
Fed	Calreticulin	23666fed_2_19	Tityus2_.fasta	43.288,8	1	5	5	6	0.0037	0.245	SGTIFDNVLITDDEDFAQKVGEETWGSTK	K	D	0.997	170	25	170	10.6	1	0	0	0	2	3202.51			405751	286	314	Empty	true
Fed	U24-ctenitoxin-Pn1a	28842fed_2_1113	Tityus2_.fasta	15.634,7	0.975	1	1	1	0.000617	0.0851	HVIGNYKPQCEK	R	D	0.997	36.1	27.2	36.1	3.74	1	0	0	0	2	1472.73			32.631,7	96	107	Empty	true
Fed	Pyruvate kinase muscle isozyme	18349fed_1_10849	Tityus2_.fasta	59.252,5	0.975	1	1	1	0.000617	0.0312	GDLGIEIPPEKVFLAQK	R	M	0.997	66.9	25	66.9	4.35	1	0	0	0	2	1854.04			355777	289	305	Empty	true
Fed	Glycogen debranching enzyme	17971fed_2_10460	Tityus2_.fasta	176.900,0	0.697	1	1	1	0.000617	0.00515	MSLNTEPK	K	Q	0.955	28.6	29.7	12.6	0.602	1	0	0	0	2	9354504			2288930	336	343	Empty	true
Fed	Myelin expression factor 2	27015fed_2_25323	Tityus2_.fasta	47.590,9	0.975	1	1	1	0.000617	0.0224	VISIELKTDK	K	E	0.997	37.5	25.5	26.1	0.854	1	0	0	0	2	1145.68			547143	236	245	Empty	true
Fed	Retinal dehydrogenase 2	23947fed_2_401	Tityus2_.fasta	54.600,2	1	3	3	3	0.00185	0.105	DNMRIAKEEIFGPVQQILK	K	F	0.997	80.5	38.6	0	0	1	0	0	0	2	2275.19			433460	379	397	Empty	true
Fed	Retinal dehydrogenase 2	23947fed_2_401	Tityus2_.fasta	54.600,2	1	3	3	3	0.00185	0.105	FADLLER	K	D	0.988	49.5	30.2	31.9	1.59	1	0	0	0	2	8634622			1832080	80	86	Empty	false	24211fed_2_62,05718fasting_1_17
Fed	Retinal dehydrogenase 2	23947fed_2_401	Tityus2_.fasta	54.600,2	1	3	3	3	0.00185	0.105	IFINNEWHDSVR	K	G	0.997	103	26.1	99.2	3.38	1	0	0	0	2	1529.75			1198320	11	22	Empty	true
Fed	Retinal dehydrogenase 2	23947fed_2_401	Tityus2_.fasta	54.600,2	1	3	3	3	0.00185	0.105	LCSVQESDKEDVEK	K	A	0.997	77.1	25	76.5	2.06	1	0	0	0	2	1665.76			217091	37	50	Empty	true
Fed	Protein disulfide-isomerase	05811fasting_1_242	Tityus2_.fasta	62.032,5	1	2	2	2	0.00123	0.0499	QLLEEKSEIQLAK	K	V	0.997	68.2	25	42.9	2.06	1	0	0	0	2	1528.86			398619	70	82	Empty	true
Fed	Protein disulfide-isomerase	05811fasting_1_242	Tityus2_.fasta	62.032,5	1	2	2	2	0.00123	0.0499	YKPEADGFSEENTR	K	T	0.997	23.5	25	23.5	3.28	1	0	0	0	2	1642.73			753772	325	338	Empty	true
Fed	Glyceraldehyde-3-phosphate dehydrogenase	05925fasting_2_328	Tityus2_.fasta	36.209,9	1	7	8	9	0.00555	0.249	DATYDEIKAAVK	K	A	0.997	35.5	26.2	22.1	1.92	1	0	0	0	2	1323.68			941510	253	264	Empty	true
Fed	Glyceraldehyde-3-phosphate dehydrogenase	05925fasting_2_328	Tityus2_.fasta	36.209,9	1	7	8	9	0.00555	0.249	GAGQNIIPASTGAAK	R	A	0.973	14.4	26.7	14.4	0.456	1	0	0	0	2	1355.73			3221350	202	216	Empty	true
Fed	Glyceraldehyde-3-phosphate dehydrogenase	05925fasting_2_328	Tityus2_.fasta	36.209,9	1	7	8	9	0.00555	0.249	LGINGFGR	K	I	0.997	36.9	29.9	23	1.24	1	0	0	0	2	8334629			1099700	8	15	Empty	true
Fed	Glyceraldehyde-3-phosphate dehydrogenase	05925fasting_2_328	Tityus2_.fasta	36.209,9	1	7	8	9	0.00555	0.249	LISWYDNEYGYSNR	K	V	0.997	88.8	25	88.8	5.8	1	0	0	0	2	1779.8			919907	312	325	Empty	true
Fed	Glyceraldehyde-3-phosphate dehydrogenase	05925fasting_2_328	Tityus2_.fasta	36.209,9	1	7	8	9	0.00555	0.249	LSKDATYDEIKAAVK	R	A	0.997	0	0	0	4.1	1	0	0	0	2	1651.89			552097	250	264	Empty	true
Fed	Glyceraldehyde-3-phosphate dehydrogenase	05925fasting_2_328	Tityus2_.fasta	36.209,9	1	7	8	9	0.00555	0.249	VINDKFGILEGLMTTVHAVTATQK	K	T	0.997	122	25	122	9.46	2	0	0	0	2	2586.4			999570	164	187	Empty	true
Fed	Glyceraldehyde-3-phosphate dehydrogenase	05925fasting_2_328	Tityus2_.fasta	36.209,9	1	7	8	9	0.00555	0.249	VIPELNGK	K	L	0.997	41.6	25.1	28.6	2.7	2	0	0	0	2	8695092			1934600	221	228	Empty	true
Fed	Calcium-transporting ATPase sarcoplasmic-endoplasmic reticulum type	26540fed_2_24694	Tityus2_.fasta	109.900,1	1	5	5	19	0.0117	0.048	EFTLEFSR	K	D	0.997	44	26.8	28.2	1.04	1	0	0	0	2	1028.5			1074100	483	490	Empty	true	02437fasting_3_13258
Fed	Calcium-transporting ATPase sarcoplasmic-endoplasmic reticulum type	26540fed_2_24694	Tityus2_.fasta	109.900,1	1	5	5	19	0.0117	0.048	GAPEGVLER	K	C	0.997	54.2	27.2	35.1	2.57	1	0	0	0	2	9274895			2525360	517	525	Empty	true
Fed	Calcium-transporting ATPase sarcoplasmic-endoplasmic reticulum type	26540fed_2_24694	Tityus2_.fasta	109.900,1	1	5	5	19	0.0117	0.048	TGTLTTNQMSVSR	K	F	0.997	74.4	27.1	74	2.51	1	0	0	0	2	1395.69			402745	354	366	Empty	true	02437fasting_3_13258
Fed	Calcium-transporting ATPase sarcoplasmic-endoplasmic reticulum type	26540fed_2_24694	Tityus2_.fasta	109.900,1	1	5	5	19	0.0117	0.048	VGEATETALIVLAEK	K	M	0.997	116	25	114	10.6	15	0	0	0	2	1543.86			1378080	438	452	Empty	true
Fed	Calcium-transporting ATPase sarcoplasmic-endoplasmic reticulum type	26540fed_2_24694	Tityus2_.fasta	109.900,1	1	5	5	19	0.0117	0.048	WKKEFTLEFSR	M	D	0.949	16.4	37.5	13.2	0.495	1	0	0	0	1	1470.77			1081280	480	490	Empty	true	02437fasting_3_13258
Fed	Alpha-L-fucosidase	05905fasting_1_312	Tityus2_.fasta	52.256,3	0.975	1	1	1	0.000617	0.0179	IIPIFEER	R	L	0.997	44.6	28.8	24	5.04	1	0	0	0	2	1016.58			401847	330	337	Empty	true
Fed	Trifunctional purine biosynthetic protein adenosine-3	06372fasting_3_662,23730fed_2_236	Tityus2_.fasta	46.774,3	1	5	5	5	0.00308	0.152	AAQIEANKAFAK	K	A	0.997	62.4	27.9	51.7	1000	1	0	0	0	2	1261.69			191446	100	111	Empty	true
Fed	Trifunctional purine biosynthetic protein adenosine-3	06372fasting_3_662,23730fed_2_236	Tityus2_.fasta	46.774,3	1	5	5	5	0.00308	0.152	EHALAWKLAE	R	S	0.948	0	0	0	0.62	1	0	0	0	1	1149.61			1186500	14	23	Empty	true
Fed	Trifunctional purine biosynthetic protein adenosine-3	06372fasting_3_662,23730fed_2_236	Tityus2_.fasta	46.774,3	1	5	5	5	0.00308	0.152	GFEITGLDDVK	K	T	0.997	81.1	28.3	71.8	6.28	1	0	0	0	2	1193.61			644059	351	361	Empty	true
Fed	Trifunctional purine biosynthetic protein adenosine-3	06372fasting_3_662,23730fed_2_236	Tityus2_.fasta	46.774,3	1	5	5	5	0.00308	0.152	IVFHAGTNILQNK	R	V	0.997	99.6	25	96.4	5.72	1	0	0	0	2	1454.81			1264350	366	378	Empty	true
Fed	Trifunctional purine biosynthetic protein adenosine-3	06372fasting_3_662,23730fed_2_236	Tityus2_.fasta	46.774,3	1	5	5	5	0.00308	0.152	LVVVGPEDPLANGISDHLLK	K	N	0.997	107	25	106	6.23	1	0	0	0	2	2086.15			237766	69	88	Empty	true
Fed	Glutathione S-transferase D5	06668fasting_3_9	Tityus2_.fasta	21.792,2	0.702	1	1	1	0.000617	0.0421	FLDGFLEK	K	S	0.956	42.1	27.8	31.5	0	1	0	0	0	2	9685089			436815	140	147	Empty	true	23723fed_1_232
Fed	Retinal dehydrogenase 2	05718fasting_1_17	Tityus2_.fasta	55.637,6	1	6	6	6	0.0037	0.127	EAFKLNSPWR	K	T	0.997	58.2	28.7	50.7	4.39	1	0	0	0	2	1247.65			794052	82	91	Empty	true	24211fed_2_62
Fed	Retinal dehydrogenase 2	05718fasting_1_17	Tityus2_.fasta	55.637,6	1	6	6	6	0.0037	0.127	FADLLER	K	D	0.988	49.5	30.2	31.9	1.59	1	0	0	0	2	8634622			1832080	105	111	Empty	true	24211fed_2_62,23947fed_2_401
Fed	Retinal dehydrogenase 2	05718fasting_1_17	Tityus2_.fasta	55.637,6	1	6	6	6	0.0037	0.127	FKTLEEAIVR	K	A	0.997	49.3	26	38.5	3.24	1	0	0	0	2	1205.69			782034	422	431	Empty	true	24211fed_2_62
Fed	Retinal dehydrogenase 2	05718fasting_1_17	Tityus2_.fasta	55.637,6	1	6	6	6	0.0037	0.127	TFVQEEIYDEFVKR	R	S	0.997	80.2	25.1	74.2	5.34	1	0	0	0	2	1802.9			567041	320	333	Empty	true	24211fed_2_62
Fed	Retinal dehydrogenase 2	05718fasting_1_17	Tityus2_.fasta	55.637,6	1	6	6	6	0.0037	0.127	TIPADGDVVSFTR	K	L	0.997	71	28	69.1	3.02	1	0	0	0	2	1377.7			535761	157	169	Empty	true	24211fed_2_62
Fed	Retinal dehydrogenase 2	05718fasting_1_17	Tityus2_.fasta	55.637,6	1	6	6	6	0.0037	0.127	YTQIFINNEWR	K	N	0.997	51	26.6	50.1	3.38	1	0	0	0	2	1483.73			494837	33	43	Empty	true	24211fed_2_62
Fed	Aldehyde dehydrogenase, mitochondrial	24211fed_2_62	Tityus2_.fasta	53.726,1	0.237	0	0	0	0	0.132	EAFKLNSPWR	K	T	0.997	58.2	28.7	50.7	4.39	1	0	0	0	2	1247.65			794052	60	69	Empty	false	05718fasting_1_17
Fed	Aldehyde dehydrogenase, mitochondrial	24211fed_2_62	Tityus2_.fasta	53.726,1	0.237	0	0	0	0	0.132	FADLLER	K	D	0.988	49.5	30.2	31.9	1.59	1	0	0	0	2	8634622			1832080	83	89	Empty	false	05718fasting_1_17,23947fed_2_401
Fed	Aldehyde dehydrogenase, mitochondrial	24211fed_2_62	Tityus2_.fasta	53.726,1	0.237	0	0	0	0	0.132	FKTLEEAIVR	K	A	0.997	49.3	26	38.5	3.24	1	0	0	0	2	1205.69			782034	403	412	Empty	false	05718fasting_1_17
Fed	Aldehyde dehydrogenase, mitochondrial	24211fed_2_62	Tityus2_.fasta	53.726,1	0.237	0	0	0	0	0.132	TFVQEEIYDEFVKR	R	S	0.997	80.2	25.1	74.2	5.34	1	0	0	0	2	1802.9			567041	301	314	Empty	false	05718fasting_1_17
Fed	Aldehyde dehydrogenase, mitochondrial	24211fed_2_62	Tityus2_.fasta	53.726,1	0.237	0	0	0	0	0.132	TIPADGDVVSFTR	K	L	0.997	71	28	69.1	3.02	1	0	0	0	2	1377.7			535761	134	146	Empty	false	05718fasting_1_17
Fed	Aldehyde dehydrogenase, mitochondrial	24211fed_2_62	Tityus2_.fasta	53.726,1	0.237	0	0	0	0	0.132	YTQIFINNEWR	K	N	0.997	51	26.6	50.1	3.38	1	0	0	0	2	1483.73			494837	11	21	Empty	false	05718fasting_1_17
Fed	unknown protein	00238fasting_3_10821	Tityus2_.fasta	41.925,0	0.975	1	1	1	0.000617	0.0364	LNSYNSFISSLIK	K	N	0.997	130	26.2	127	5.18	1	0	0	0	2	1485.79			197919	63	75	Empty	true
Fed	Rab GDP dissociation inhibitor alpha	23774fed_3_267	Tityus2_.fasta	50.214,1	1	8	8	9	0.00555	0.278	DALSCQIIIPQK	K	Q	0.997	92.4	26.8	83.5	7	1	0	0	0	2	1385.75			472376	313	324	Empty	true
Fed	Rab GDP dissociation inhibitor alpha	23774fed_3_267	Tityus2_.fasta	50.214,1	1	8	8	9	0.00555	0.278	FIWVSDVYRPK	K	D	0.997	58.6	26	51	2.12	1	0	0	0	2	1409.76			995421	380	390	Empty	true
Fed	Rab GDP dissociation inhibitor alpha	23774fed_3_267	Tityus2_.fasta	50.214,1	1	8	8	9	0.00555	0.278	FNLPSAQLDEYGR	K	S	0.997	83	26.7	78	3.89	1	0	0	0	2	1509.73			1784310	56	68	Empty	true
Fed	Rab GDP dissociation inhibitor alpha	23774fed_3_267	Tityus2_.fasta	50.214,1	1	8	8	9	0.00555	0.278	GTGEDFDFSK	R	V	0.997	59.2	25	58.9	0.432	1	0	0	0	2	1102.47			699173	424	433	Empty	true
Fed	Rab GDP dissociation inhibitor alpha	23774fed_3_267	Tityus2_.fasta	50.214,1	1	8	8	9	0.00555	0.278	LSAIYGGTYMLDKPIDEIVLEDGKVVGVR	R	S	0.997	157	25	157	12.2	1	0	0	0	2	3150.68			424781	241	269	Empty	true
Fed	Rab GDP dissociation inhibitor alpha	23774fed_3_267	Tityus2_.fasta	50.214,1	1	8	8	9	0.00555	0.278	SPYLYPLYGLGELPQGFAR	K	L	0.997	98.2	25	88.1	10.7	2	0	0	0	2	2141.11			270842	222	240	Empty	true
Fed	Rab GDP dissociation inhibitor alpha	23774fed_3_267	Tityus2_.fasta	50.214,1	1	8	8	9	0.00555	0.278	SRDWNIDLIPK	R	F	0.997	33.5	27.1	22.9	3.72	1	0	0	0	2	1356.73			428558	69	79	Empty	true
Fed	Rab GDP dissociation inhibitor alpha	23774fed_3_267	Tityus2_.fasta	50.214,1	1	8	8	9	0.00555	0.278	YYGGESASITPLEELFAK	K	F	0.997	140	25.1	140	9.96	1	0	0	0	2	1974.97			239620	38	55	Empty	true
Fed	Filamin-A	06594fasting_3_840	Tityus2_.fasta	237.867,5	1	1	1	1	0.000617	0.0105	IKVDGLEPSVFLDSPTDFIVDAR	K	A	0.997	62.7	25	60.6	7.8	1	0	0	0	2	2533.32			19.680,3	841	863	Empty	true
Fed	Cholinesterase	12269fasting_1_1900,23236fed_2_20566	Tityus2_.fasta	61.081,8	1	2	3	3	0.00185	0.0409	IIELWTSFAK	R	T	0.997	49.2	26.1	48.4	0.796	2	0	0	0	2	1207.67			1056380	478	487	Empty	true
Fed	Cholinesterase	12269fasting_1_1900,23236fed_2_20566	Tityus2_.fasta	61.081,8	1	2	3	3	0.00185	0.0409	SFSLTLGNFHLR	K	R	0.997	68	37.4	65.5	0	1	0	0	0	2	1357.76			697428	510	521	Empty	true
Fed	Superoxide dismutase [Cu-Zn]	29401fed_2_1761	Tityus2_.fasta	5.240,3	0.975	1	1	1	0.000617	0.196	LACGVIGITK	R	-	0.997	35.7	28.2	35.7	1.85	1	0	0	0	2	1031.59			665228	42	51	Empty	true
Fed	4-hydroxyphenylpyruvate dioxygenase	12985fasting_3_33536	Tityus2_.fasta	15.910,2	1	2	2	2	0.00123	0.174	GFFLPGYK	K	K	0.997	34.7	27.7	28.2	1.49	1	0	0	0	2	9284928			373509	47	54	Empty	true
Fed	4-hydroxyphenylpyruvate dioxygenase	12985fasting_3_33536	Tityus2_.fasta	15.910,2	1	2	2	2	0.00123	0.174	VVKDVWEEKDEHGSVR	K	F	0.997	0	0	0	8.72	1	0	0	0	2	1911.96			1217070	9	24	Empty	true
Fed	Xaa-Pro dipeptidase	06110fasting_1_470	Tityus2_.fasta	58.853,5	0.975	1	1	1	0.000617	0.0268	ILSSLQPEVLLTLR	K	G	0.997	30.3	25	30.3	3.07	1	0	0	0	2	1581.96			220242	161	174	Empty	true
Fed	WD repeat domain phosphoinositide-interacting protein 2	24478fed_1_835	Tityus2_.fasta	49.764,6	1	2	2	2	0.00123	0.0501	NTILAVKLNR	S	L	0.969	34	36.1	20.5	0.523	1	0	0	0	1	1141.71			333529	98	107	Empty	true
Fed	WD repeat domain phosphoinositide-interacting protein 2	24478fed_1_835	Tityus2_.fasta	49.764,6	1	2	2	2	0.00123	0.0501	VLHTIRDTPPNPR	K	G	0.997	49.2	25.1	46.9	1.17	1	0	0	0	2	1515.84			142881	128	140	Empty	true
Fed	Polyubiquitin-C	23714fed_2_225	Tityus2_.fasta	51.588,8	1	5	5	12	0.0074	0.0852	AKIQDKEGIPPDQQR	K	L	0.964	0	0	0	0.42	1	0	0	0	2	1722.91			56.270,6	28	42	Empty	true
Fed	Polyubiquitin-C	23714fed_2_225	Tityus2_.fasta	51.588,8	1	5	5	12	0.0074	0.0852	IQDKEGIPPDQQR	K	L	0.997	86.7	26.5	84.1	2.62	8	0	0	0	2	1523.78			2534900	30	42	Empty	true
Fed	Polyubiquitin-C	23714fed_2_225	Tityus2_.fasta	51.588,8	1	5	5	12	0.0074	0.0852	QLEDGRTLSDYNIQK	K	E	0.997	87.9	26	77.3	3.51	1	0	0	0	2	1779.89			1124200	49	63	Empty	true
Fed	Polyubiquitin-C	23714fed_2_225	Tityus2_.fasta	51.588,8	1	5	5	12	0.0074	0.0852	QLEDGRTLSDYNIQKESTLHLVLR	K	L	0.997	0	0	0	6.96	1	0	0	0	2	2828.49			375852	49	72	Empty	true
Fed	Polyubiquitin-C	23714fed_2_225	Tityus2_.fasta	51.588,8	1	5	5	12	0.0074	0.0852	TLSDYNIQKESTLHLVLR	R	L	0.997	145	25	145	3.64	1	0	0	0	2	2130.16			967497	55	72	Empty	true
Fed	Cofilin-actin-depolymerizing factor homolog	07702fasting_1_24238	Tityus2_.fasta	16.976,6	1	4	4	4	0.00247	0.432	LVLMTWCPEGSK	R	I	0.997	66.9	26.9	66.9	2.46	1	0	0	0	2	1420.7			311470	90	101	Empty	true
Fed	Cofilin-actin-depolymerizing factor homolog	07702fasting_1_24238	Tityus2_.fasta	16.976,6	1	4	4	4	0.00247	0.432	MLYSSSYDALKK	K	A	0.997	69.8	28.2	0	4.11	1	0	0	0	2	1405.7			1517970	106	117	Empty	true	25470fed_2_22014
Fed	Cofilin-actin-depolymerizing factor homolog	07702fasting_1_24238	Tityus2_.fasta	16.976,6	1	4	4	4	0.00247	0.432	NATYSDFLDTMQQFKTECR	R	Y	0.997	94.1	25	94.1	7.18	1	0	0	0	2	2355.04			906603	46	64	Empty	true
Fed	Cofilin-actin-depolymerizing factor homolog	07702fasting_1_24238	Tityus2_.fasta	16.976,6	1	4	4	4	0.00247	0.432	YVQACDFEEISQEAIEDAFRK	K	G	0.997	166	25	166	11.2	1	0	0	0	2	2548.17			703490	125	145	Empty	true
Fed	Phosphoribosylformylglycinamidine synthase	00735fasting_3_11189,24419fed_1_79	Tityus2_.fasta	145.611,0	1	2	2	2	0.00123	0.0318	ESHRPSSFITHSGVR	K	H	0.997	45.4	25.7	45	3.31	1	0	0	0	2	1696.85			338971	293	307	Empty	true
Fed	Phosphoribosylformylglycinamidine synthase	00735fasting_3_11189,24419fed_1_79	Tityus2_.fasta	145.611,0	1	2	2	2	0.00123	0.0318	LGGSALAQCFNQLGDNTADLDSPELLR	R	T	0.997	99.2	25	99.2	13	1	0	0	0	2	2875.39			82.984,9	854	880	Empty	true
Fed	Glutathione S-transferase 1, isoform D	04113fasting_1_16682	Tityus2_.fasta	23.076,3	1	3	3	3	0.00185	0.23	AFRDALTLYDGYLQK	K	T	0.997	22.8	25.5	22.8	1.49	1	0	0	0	2	1773.92			782594	114	128	Empty	true
Fed	Glutathione S-transferase 1, isoform D	04113fasting_1_16682	Tityus2_.fasta	23.076,3	1	3	3	3	0.00185	0.23	AVMTYFINK	R	Y	0.971	36.4	28.4	36.4	1.77	1	0	0	0	2	1086.57			974028	52	60	Empty	true
Fed	Glutathione S-transferase 1, isoform D	04113fasting_1_16682	Tityus2_.fasta	23.076,3	1	3	3	3	0.00185	0.23	TLAETLFGPLFRGEQLNPDKEK	K	A	0.97	0	0	0	1.82	1	0	0	0	2	2503.32			172879	92	113	Empty	true
Fed	Profilin-2	06169fasting_3_51	Tityus2_.fasta	14.381,7	1	3	3	3	0.00185	0.206	DLPKPVTQQELK	K	L	0.997	41	25	34.3	1.49	1	0	0	0	2	1395.78			259825	37	48	Empty	true
Fed	Profilin-2	06169fasting_3_51	Tityus2_.fasta	14.381,7	1	3	3	3	0.00185	0.206	FEKDLPKPVTQQELK	K	L	0.997	82.1	25	78.2	7.62	1	0	0	0	2	1799.99			1488620	34	48	Empty	true
Fed	Profilin-2	06169fasting_3_51	Tityus2_.fasta	14.381,7	1	3	3	3	0.00185	0.206	TNPNSFTESGIR	R	L	0.997	52.5	27.2	42.6	0.569	1	0	0	0	2	1322.63			1980620	56	67	Empty	true
Fed	Apical endosomal glycoprotein	13927fasting_1_2788	Tityus2_.fasta	169.557,3	1	6	6	6	0.0037	0.0528	HLAEAPFGPYIDNTFGNK	R	L	0.997	71.2	25	68.4	12.4	1	0	0	0	2	1990.97			256295	1412	1429	Empty	true
Fed	Apical endosomal glycoprotein	13927fasting_1_2788	Tityus2_.fasta	169.557,3	1	6	6	6	0.0037	0.0528	ISDHSAQTFQGR	K	F	0.997	64.1	26.6	64.1	1.68	1	0	0	0	2	1346.64			112524	1235	1246	Empty	true
Fed	Apical endosomal glycoprotein	13927fasting_1_2788	Tityus2_.fasta	169.557,3	1	6	6	6	0.0037	0.0528	LDHTTGTDYGYYLQAK	K	S	0.997	43.1	25	43.1	3.38	1	0	0	0	2	1845.87			778636	725	740	Empty	true
Fed	Apical endosomal glycoprotein	13927fasting_1_2788	Tityus2_.fasta	169.557,3	1	6	6	6	0.0037	0.0528	LTLWWQIVK	K	R	0.997	61.7	25.7	55.1	1.92	1	0	0	0	2	1186.7			130627	1058	1066	Empty	true
Fed	Apical endosomal glycoprotein	13927fasting_1_2788	Tityus2_.fasta	169.557,3	1	6	6	6	0.0037	0.0528	VQNFELVK	R	I	0.956	42.1	28.6	28.8	0	1	0	0	0	2	9765462			424713	881	888	Empty	true
Fed	Apical endosomal glycoprotein	13927fasting_1_2788	Tityus2_.fasta	169.557,3	1	6	6	6	0.0037	0.0528	YIFALGNENTVGEAR	R	L	0.997	48.8	26.4	48.8	4.68	1	0	0	0	2	1653.82			593961	1086	1100	Empty	true
Fed	Heat shock 70 kDa protein cognate 4	14712fasting_3_3820,30901fed_3_3814	Tityus2_.fasta	70.882,1	0.532	0	0	0	0	0.0618	ARFEELNADLFR	R	G	0.997	50.1	26.9	32.6	2.89	1	0	0	0	2	1480.75			429253	300	311	Empty	false	23592fed_1_123
Fed	Heat shock 70 kDa protein cognate 4	14712fasting_3_3820,30901fed_3_3814	Tityus2_.fasta	70.882,1	0.532	0	0	0	0	0.0618	DSGTIAGLNVLR	K	I	0.997	95.1	27.2	91.2	3.41	1	0	0	0	2	1215.67			778965	160	171	Empty	false	23592fed_1_123
Fed	Heat shock 70 kDa protein cognate 4	14712fasting_3_3820,30901fed_3_3814	Tityus2_.fasta	70.882,1	0.532	0	0	0	0	0.0618	STAGDTHLGGEDFDNR	K	M	0.997	114	25	114	6.28	1	0	0	0	2	1691.73			1323810	221	236	Empty	false	23592fed_1_123
Fed	Nucleoredoxin-like protein 2	23920fed_2_38	Tityus2_.fasta	15.945,7	0.975	1	1	1	0.000617	0.0915	FKIEGIPSLIVVK	R	K	0.997	27.3	25	27.3	3.39	1	0	0	0	2	1442.9			377028	103	115	Empty	true
Fed	Ras GTPase-activating protein 3	17523fed_1_10020	Tityus2_.fasta	95.851,0	0.991	1	1	1	0.000617	0.00839	KIVSFLK	R	A	0.988	42.3	25	0	3.15	1	0	0	0	2	8345448			1160100	347	353	Empty	true
Fed	Adenosylhomocysteinase	30286fed_2_2899	Tityus2_.fasta	8.826,9	1	2	2	2	0.00123	0.15	VANINLADFGR	K	K	0.997	58.8	28.5	55.5	4.28	1	0	0	0	2	1189.63			1005300	9	19	Empty	true
Fed	Adenosylhomocysteinase	30286fed_2_2899	Tityus2_.fasta	8.826,9	1	2	2	2	0.00123	0.15	VANINLADFGRK	K	E	0.997	60.8	27.2	60.8	3.46	1	0	0	0	2	1317.73			669441	9	20	Empty	true
Fed	AP-2 complex subunit mu	15019fasting_1_4347	Tityus2_.fasta	36.612,0	1	2	2	2	0.00123	0.101	KLDVLANDLFINMLK	K	S	0.991	41.4	25	37.1	3.08	1	0	0	0	2	1746.98			30.018,6	75	89	Empty	true
Fed	AP-2 complex subunit mu	15019fasting_1_4347	Tityus2_.fasta	36.612,0	1	2	2	2	0.00123	0.101	SPIFLGSKEDVEDIINLYK	R	K	0.997	135	25	135	14	1	0	0	0	2	2180.15			92.733,9	316	334	Empty	true
Fed	Probable transaldolase	23342fed_3_20682	Tityus2_.fasta	38.724,2	0.975	1	1	1	0.000617	0.0347	ILDWFVANTDKK	R	Q	0.997	37.7	26.3	37.7	2.09	1	0	0	0	2	1449.77			282446	208	219	Empty	true
Fed	CUB and LDL domains-containing trypsin-like serine peptidase 3	33778Fasting_10828	Tityus2_.fasta	53.767,4	0.975	1	1	1	0.000617	0.0206	FVFCGDTAPR	R	D	0.997	49.6	25.8	49.6	2.96	1	0	0	0	2	1169.54			576302	125	134	Empty	true
Fed	Fumarylacetoacetase	15148fasting_3_4542	Tityus2_.fasta	50.929,5	1	4	4	5	0.00308	0.125	ASSVVVSGTPIHRPHGQTR	R	A	0.997	87.4	25	87.4	4.72	2	0	0	0	2	1986.06			1012970	163	181	Empty	true
Fed	Fumarylacetoacetase	15148fasting_3_4542	Tityus2_.fasta	50.929,5	1	4	4	5	0.00308	0.125	DIQKWEYVPLGPFLAK	R	N	0.997	27.7	25	27.7	2.66	1	0	0	0	2	1904.03			145551	238	253	Empty	true
Fed	Fumarylacetoacetase	15148fasting_3_4542	Tityus2_.fasta	50.929,5	1	4	4	5	0.00308	0.125	GSKPITLSDGQTR	R	T	0.997	22.4	27.3	22.4	0.337	1	0	0	0	2	1359.72			153285	369	381	Empty	true
Fed	Fumarylacetoacetase	15148fasting_3_4542	Tityus2_.fasta	50.929,5	1	4	4	5	0.00308	0.125	LGQPVPINK	K	A	0.997	24.7	25.3	20.8	2.85	1	0	0	0	2	9655780			305383	212	220	Empty	true
Fed	cathepsin L-like cysteine peptidase 2a	33786Fed_5610,33793Fasting_6385	Tityus2_.fasta	37.093,1	1	2	2	2	0.00123	0.0744	IPDTVDWR	D	Q	0.997	40.7	36.4	0	1.7	1	0	0	0	1	1001.51			2702610	120	127	Empty	true	33783Fed_15067
Fed	cathepsin L-like cysteine peptidase 2a	33786Fed_5610,33793Fasting_6385	Tityus2_.fasta	37.093,1	1	2	2	2	0.00123	0.0744	NKNNQCGIATQASYPLV	R	-	0.997	60.1	25.2	60.1	3.85	1	0	0	0	2	1877.92			1381430	320	336	Empty	true
Fed	Tumor necrosis factor alpha-induced protein 8-like protein	16039fasting_1_5834	Tityus2_.fasta	21.541,8	0.975	1	1	1	0.000617	0.0479	SLLKDLVVR	R	H	0.997	59.7	25.7	46.3	2.82	1	0	0	0	2	1042.66			667469	127	135	Empty	true
Fed	Hemocyanin AA6 chain	10337fasting_2_29538,29086fed_2_1376	Tityus2_.fasta	71.794,0	1	21	22	23	0.0142	0.539	DLSDVDVQDMVR	K	W	0.997	59.5	25.8	55	1.41	1	0	0	0	2	1391.65			1524130	258	269	Empty	true
Fed	Hemocyanin AA6 chain	10337fasting_2_29538,29086fed_2_1376	Tityus2_.fasta	71.794,0	1	21	22	23	0.0142	0.539	DSSVTISEVK	R	T	0.997	60.2	29	50.6	2.62	1	0	0	0	2	1064.55			679250	504	513	Empty	true
Fed	Hemocyanin AA6 chain	10337fasting_2_29538,29086fed_2_1376	Tityus2_.fasta	71.794,0	1	21	22	23	0.0142	0.539	EAINNPDQASIVVEAEDTGNILDPEYK	K	L	0.997	81.9	25	81.9	10.1	1	0	0	0	2	2944.41			117195	131	157	Empty	true
Fed	Hemocyanin AA6 chain	10337fasting_2_29538,29086fed_2_1376	Tityus2_.fasta	71.794,0	1	21	22	23	0.0142	0.539	EKLPVSERDDR	R	L	0.957	0	0	0	0.921	1	0	0	0	2	1343.69			165646	23	33	Empty	true
Fed	Hemocyanin AA6 chain	10337fasting_2_29538,29086fed_2_1376	Tityus2_.fasta	71.794,0	1	21	22	23	0.0142	0.539	EKLPVSERDDRLK	R	G	0.969	0	0	0	2.05	1	0	0	0	2	1584.87			1297400	23	35	Empty	true
Fed	Hemocyanin AA6 chain	10337fasting_2_29538,29086fed_2_1376	Tityus2_.fasta	71.794,0	1	21	22	23	0.0142	0.539	ENPGVMSDTSTSLRDPIFYR	Q	W	0.997	80.4	25	80.4	7.43	1	0	0	0	1	2285.09			1950500	341	360	Empty	false	10353fasting_2_29561,19977fed_1_12930,02750fasting_2_13777,27819fed_3_26963,04165fasting_1_16742
Fed	Hemocyanin AA6 chain	10337fasting_2_29538,29086fed_2_1376	Tityus2_.fasta	71.794,0	1	21	22	23	0.0142	0.539	FIDNIFQEYK	R	C	0.997	74.8	27.4	61.9	2.8	1	0	0	0	2	1316.65			778704	364	373	Empty	true
Fed	Hemocyanin AA6 chain	10337fasting_2_29538,29086fed_2_1376	Tityus2_.fasta	71.794,0	1	21	22	23	0.0142	0.539	FIPTETINLANK	R	E	0.997	81.1	26.1	74.3	3.55	1	0	0	0	2	1360.75			1751180	119	130	Empty	true
Fed	Hemocyanin AA6 chain	10337fasting_2_29538,29086fed_2_1376	Tityus2_.fasta	71.794,0	1	21	22	23	0.0142	0.539	FQENPGVMSDTSTSLRDPIFYR	R	W	0.997	85.8	25	73.2	8.07	1	0	0	0	2	2560.21			649737	339	360	Empty	true
Fed	Hemocyanin AA6 chain	10337fasting_2_29538,29086fed_2_1376	Tityus2_.fasta	71.794,0	1	21	22	23	0.0142	0.539	GLTVPPIQEVFPDR	K	F	0.997	15.4	25.6	11.2	0.456	1	0	0	0	2	1567.85			311897	105	118	Empty	true
Fed	Hemocyanin AA6 chain	10337fasting_2_29538,29086fed_2_1376	Tityus2_.fasta	71.794,0	1	21	22	23	0.0142	0.539	GLTVPPIQEVFPDRFIPTETINLANK	K	E	0.997	78.7	25	78.7	5.74	1	0	0	0	2	2909.58			473473	105	130	Empty	true
Fed	Hemocyanin AA6 chain	10337fasting_2_29538,29086fed_2_1376	Tityus2_.fasta	71.794,0	1	21	22	23	0.0142	0.539	GTLFSCFHSR	R	H	0.997	52.7	26.2	52.3	1.92	1	0	0	0	2	1211.56			1725620	43	52	Empty	true
Fed	Hemocyanin AA6 chain	10337fasting_2_29538,29086fed_2_1376	Tityus2_.fasta	71.794,0	1	21	22	23	0.0142	0.539	ILDAINMHYIVDKDNNK	R	I	0.997	95.3	25	94.8	7.36	2	0	0	0	2	2016.02			1656950	274	290	Empty	true
Fed	Hemocyanin AA6 chain	10337fasting_2_29538,29086fed_2_1376	Tityus2_.fasta	71.794,0	1	21	22	23	0.0142	0.539	IPLDVEHGTDILGDIIESSDESK	K	N	0.997	93.1	25	92.8	16.7	1	0	0	0	2	2482.22			444507	291	313	Empty	true
Fed	Hemocyanin AA6 chain	10337fasting_2_29538,29086fed_2_1376	Tityus2_.fasta	71.794,0	1	21	22	23	0.0142	0.539	LFIELDKFYATLAAGK	R	T	0.997	138	25	129	5.77	1	0	0	0	2	1799.99			247001	480	495	Empty	true
Fed	Hemocyanin AA6 chain	10337fasting_2_29538,29086fed_2_1376	Tityus2_.fasta	71.794,0	1	21	22	23	0.0142	0.539	LSYFREDVGINAHHWHWHIVYPATWNPAVMHK	K	E	0.997	30.3	25	30.3	6.4	1	0	0	0	2	3911.91			206863	158	189	Empty	true
Fed	Hemocyanin AA6 chain	10337fasting_2_29538,29086fed_2_1376	Tityus2_.fasta	71.794,0	1	21	22	23	0.0142	0.539	MIPFHNFEEPLEGYAPHLTSLVSGLQYASRPEGYSIK	R	D	0.997	141	25	141	10	2	0	0	0	2	4178.07			399625	221	257	Empty	true
Fed	Hemocyanin AA6 chain	10337fasting_2_29538,29086fed_2_1376	Tityus2_.fasta	71.794,0	1	21	22	23	0.0142	0.539	NHRDSSVTISEVK	R	T	0.997	41.8	26.6	31.9	2.11	1	0	0	0	2	1471.75			316331	501	513	Empty	true
Fed	Hemocyanin AA6 chain	10337fasting_2_29538,29086fed_2_1376	Tityus2_.fasta	71.794,0	1	21	22	23	0.0142	0.539	QFVNEGMFVYAVSVAVLHREDCK	R	G	0.997	77.3	25	77.2	9.2	1	0	0	0	2	2698.31			204363	82	104	Empty	true
Fed	Hemocyanin AA6 chain	10337fasting_2_29538,29086fed_2_1376	Tityus2_.fasta	71.794,0	1	21	22	23	0.0142	0.539	TAAEFLTANMALIDIK	R	I	0.997	89.6	25.1	86.9	9.18	1	0	0	0	2	1721.91			81.034,7	607	622	Empty	true
Fed	Hemocyanin AA6 chain	10337fasting_2_29538,29086fed_2_1376	Tityus2_.fasta	71.794,0	1	21	22	23	0.0142	0.539	TFKELDAGEGVAEESTEYCSCGWPEHMLVPR	K	G	0.997	135	25	135	14.9	1	0	0	0	2	3584.58			262432	514	544	Empty	true
Fed	Hemocyanin AA6 chain	10337fasting_2_29538,29086fed_2_1376	Tityus2_.fasta	71.794,0	1	21	22	23	0.0142	0.539	TPNVVTTLTK	K	E	0.997	79.6	27.7	73.5	7.02	1	0	0	0	2	1073.62			817974	400	409	Empty	true
Fed	unknown protein	28337fed_3_28112,28338fed_3_28114	Tityus2_.fasta	5.796,5	1	5	8	12	0.0074	0.725	CAIPCEPK	K	F	0.997	46.9	25	46.9	2.06	1	0	0	0	2	9744436			400180	31	38	Empty	true
Fed	unknown protein	28337fed_3_28112,28338fed_3_28114	Tityus2_.fasta	5.796,5	1	5	8	12	0.0074	0.725	CKNPAESFIVELDK	K	C	0.997	64.5	26.5	64.5	6.66	2	0	0	0	2	1649.82			934202	17	30	Empty	true
Fed	unknown protein	28337fed_3_28112,28338fed_3_28114	Tityus2_.fasta	5.796,5	1	5	8	12	0.0074	0.725	CKNPAESFIVELDKCAIPCEPK	K	F	0.997	159	38.8	17.4	11.5	2	0	0	0	2	2588.22			781248	17	38	Empty	true
Fed	unknown protein	28337fed_3_28112,28338fed_3_28114	Tityus2_.fasta	5.796,5	1	5	8	12	0.0074	0.725	GGESCEKVENNDVCK	M	C	0.997	139	32.6	0	0	6	0	0	0	1	1738.74			2914530	2	16	Empty	true
Fed	unknown protein	28337fed_3_28112,28338fed_3_28114	Tityus2_.fasta	5.796,5	1	5	8	12	0.0074	0.725	NPAESFIVELDKCAIPCEPK	K	F	0.997	143	25	143	14.4	1	0	0	0	2	2317.12			304645	19	38	Empty	true
Fed	Probable chitinase 3	14829fasting_1_4003	Tityus2_.fasta	52.347,4	0.975	1	1	1	0.000617	0.021	LILGVPFYGR	K	S	0.997	33.6	25	22.2	0.921	1	0	0	0	2	1134.67			374382	338	347	Empty	true
Fed	Calreticulin	23666fed_2_19	Tityus2_.fasta	43.288,8	0.983	1	1	1	0.000869	0.0511	SGTIFDNVLITDDEDFAQK	K	V	0.997	68	25	52.5	4.4	1	0	0	0	2	2128.01			30.563,6	286	304	Empty	true
Fed	unknown protein	06268fasting_2_579,23287fed_3_20624	Tityus2_.fasta	33.500,7	0.983	1	1	1	0.000869	0.0261	LDAAIQFK	K	I	0.997	52.2	29.4	42.4	1.16	1	0	0	0	2	9055092			316684	118	125	Empty	true
Fed	Phosphoribosylformylglycinamidine synthase	00735fasting_3_11189,24419fed_1_79	Tityus2_.fasta	145.611,0	0.998	1	1	1	0.000869	0.0114	ESHRPSSFITHSGVR	K	H	0.997	47.6	25.7	46.7	4.16	1	0	0	0	2	1696.85			86.288,4	293	307	Empty	true
Fed	Hemocyanin F chain	10353fasting_2_29561	Tityus2_.fasta	71.568,2	1	4	4	4	0.00348	0.139	FVPAETINHALK	R	A	0.997	45.8	26	45.8	3.18	1	0	0	0	2	1339.74			113401	119	130	Empty	true
Fed	Hemocyanin F chain	10353fasting_2_29561	Tityus2_.fasta	71.568,2	1	4	4	4	0.00348	0.139	ILPLFEHLTSLTAK	R	Q	0.997	73.8	25	68.5	2.43	1	0	0	0	2	1582.92			168692	10	23	Empty	true
Fed	Hemocyanin F chain	10353fasting_2_29561	Tityus2_.fasta	71.568,2	1	4	4	4	0.00348	0.139	VLDAIHVGHVIDDHGHEIPLDEEHGIDILGSLLESSAESK	R	N	0.997	31.9	25	31.9	4.29	1	0	0	0	2	4296.14			143186	274	313	Empty	true
Fed	Hemocyanin F chain	10353fasting_2_29561	Tityus2_.fasta	71.568,2	1	4	4	4	0.00348	0.139	VPDVITTTMKEDVLQLSHGIK	K	T	0.997	89.2	25	85	3.8	1	0	0	0	2	2324.25			147738	400	420	Empty	true
Fed	unknown protein	28337fed_3_28112,28338fed_3_28114	Tityus2_.fasta	5.796,5	1	5	12	17	0.0148	0.725	CKNPAESFIVELDK	K	C	0.997	67.9	26.5	67.9	6.74	4	0	0	0	2	1649.82			930488	17	30	Empty	true
Fed	unknown protein	28337fed_3_28112,28338fed_3_28114	Tityus2_.fasta	5.796,5	1	5	12	17	0.0148	0.725	CKNPAESFIVELDKCAIPCEPK	K	F	0.997	166	37.7	17.4	13.1	7	0	0	0	2	2588.22			1305070	17	38	Empty	true
Fed	unknown protein	28337fed_3_28112,28338fed_3_28114	Tityus2_.fasta	5.796,5	1	5	12	17	0.0148	0.725	GGESCEKVENNDVCK	M	C	0.997	72.7	33.2	13.5	0	3	0	0	0	1	1766.77			783003	2	16	Empty	true
Fed	unknown protein	28337fed_3_28112,28338fed_3_28114	Tityus2_.fasta	5.796,5	1	5	12	17	0.0148	0.725	NPAESFIVELDK	K	C	0.997	98.8	27.5	86.3	5.07	2	0	0	0	2	1361.69			396091	19	30	Empty	true
Fed	unknown protein	28337fed_3_28112,28338fed_3_28114	Tityus2_.fasta	5.796,5	1	5	12	17	0.0148	0.725	NPAESFIVELDKCAIPCEPK	K	F	0.997	164	25	164	15	1	0	0	0	2	2317.12			393113	19	38	Empty	true
Fed	Catalase	06540fasting_3_79	Tityus2_.fasta	62.484,5	0.999	1	1	1	0.000869	0.0387	AAELSGSDPDYSIRDLYNAIR	K	S	0.997	64.6	25	64.6	2.42	1	0	0	0	2	2326.13			84.185,3	283	303	Empty	true	24000fed_2_451
Fed	Focal adhesion kinase 1	26084fed_1_23351	Tityus2_.fasta	119.288,9	0.983	1	1	1	0.000869	0.0125	NDSPITKYSSIPR	R	K	0.997	31.5	25.9	30	0.585	1	0	0	0	2	1477.76			924047	327	339	Empty	true
Fed	Hemocyanin AA6 chain	04165fasting_1_16742,27819fed_3_26963	Tityus2_.fasta	71.668,1	1	11	11	12	0.0104	0.315	DLDEATKLYEILYHAKDFDDFYLLAK	K	Q	0.997	0	0	0	12.4	1	0	0	0	2	3149.57			174326	53	78	Empty	true
Fed	Hemocyanin AA6 chain	04165fasting_1_16742,27819fed_3_26963	Tityus2_.fasta	71.668,1	1	11	11	12	0.0104	0.315	DLKDVDVQDMER	R	W	0.997	35.6	25.7	28.3	1.33	1	0	0	0	2	1462.68			146177	257	268	Empty	true
Fed	Hemocyanin AA6 chain	04165fasting_1_16742,27819fed_3_26963	Tityus2_.fasta	71.668,1	1	11	11	12	0.0104	0.315	EQIDFPGVEVTNVTVNAK	R	K	0.997	93.2	25	93.2	4.92	1	0	0	0	2	1960			159921	381	398	Empty	true
Fed	Hemocyanin AA6 chain	04165fasting_1_16742,27819fed_3_26963	Tityus2_.fasta	71.668,1	1	11	11	12	0.0104	0.315	FVDNIFQDYK	R	A	0.997	68	27.4	67.9	3.3	1	0	0	0	2	1288.62			236874	363	372	Empty	true
Fed	Hemocyanin AA6 chain	04165fasting_1_16742,27819fed_3_26963	Tityus2_.fasta	71.668,1	1	11	11	12	0.0104	0.315	FVPAETVNLAIK	R	E	0.997	71.3	25.9	66.7	2.26	1	0	0	0	2	1301.75			483259	119	130	Empty	true
Fed	Hemocyanin AA6 chain	04165fasting_1_16742,27819fed_3_26963	Tityus2_.fasta	71.668,1	1	11	11	12	0.0104	0.315	IFLGPKFDELGNVLDVNEQR	R	R	0.997	93.8	25	89.1	7.1	1	0	0	0	2	2303.2			260237	458	477	Empty	true
Fed	Hemocyanin AA6 chain	04165fasting_1_16742,27819fed_3_26963	Tityus2_.fasta	71.668,1	1	11	11	12	0.0104	0.315	IFLGPKFDELGNVLDVNEQRR	R	L	0.997	0	0	0	7.32	1	0	0	0	2	2459.3			258432	458	478	Empty	true
Fed	Hemocyanin AA6 chain	04165fasting_1_16742,27819fed_3_26963	Tityus2_.fasta	71.668,1	1	11	11	12	0.0104	0.315	ILDAIHLGHIHTSEDEEIALDEAHGADILGDIIESSAESR	R	N	0.997	79.1	25	79.1	5.82	2	0	0	0	2	4292.1			273533	273	312	Empty	true
Fed	Hemocyanin AA6 chain	04165fasting_1_16742,27819fed_3_26963	Tityus2_.fasta	71.668,1	1	11	11	12	0.0104	0.315	ILSLFEHLTSLTEK	R	Q	0.997	77.6	25	65.7	2.46	1	0	0	0	2	1630.91			209901	10	23	Empty	true
Fed	Hemocyanin AA6 chain	04165fasting_1_16742,27819fed_3_26963	Tityus2_.fasta	71.668,1	1	11	11	12	0.0104	0.315	NQEFYGSLHNWGHVLMAR	R	I	0.997	70.3	25	70.3	6.09	1	0	0	0	2	2159.02			59.354,2	313	330	Empty	true
Fed	Hemocyanin AA6 chain	04165fasting_1_16742,27819fed_3_26963	Tityus2_.fasta	71.668,1	1	11	11	12	0.0104	0.315	QAHSFVNEGLFVYAVSVALLHRDDCK	K	G	0.997	64.8	25	64.8	7.1	1	0	0	0	2	2975.48			26.992,1	79	104	Empty	true
Fed	cathepsin L-like cysteine peptidase 4	33783Fed_15067	Tityus2_.fasta	37.615,7	0.983	1	1	1	0.000869	0.0455	LVSLSEQNLVDCSKK	K	D	0.997	114	25.5	0	8.18	1	0	0	0	2	1719.89			815717	160	174	Empty	true
Fed	CLIP-associating protein 1	21163fed_3_15208	Tityus2_.fasta	83.872,0	1	1	1	1	0.000869	0.0147	QLEIPFQLSVK	R	D	0.997	21.5	25	4.23	2.51	1	0	0	0	2	1301.75			101165	361	371	Empty	true
Fed	Dipeptidyl peptidase 4	00565fasting_2_11024	Tityus2_.fasta	68.973,7	0.86	1	1	1	0.000869	0.0183	KNYIYAWIDGR	R	G	0.975	0	0	0	0.721	1	0	0	0	2	1398.72			899991	389	399	Empty	true
Fed	Tumor necrosis factor alpha-induced protein 8-like protein	16039fasting_1_5834	Tityus2_.fasta	21.541,8	0.996	1	1	1	0.000869	0.0479	SLLKDLVVR	R	H	0.997	57.7	25.7	44.2	0.602	1	0	0	0	2	1042.66			570556	127	135	Empty	true
Fed	Polyubiquitin-C	23714fed_2_225	Tityus2_.fasta	51.588,8	0.983	1	1	1	0.000869	0.0284	IQDKEGIPPDQQR	K	L	0.997	37.9	26.6	37.9	0.959	1	0	0	0	2	1523.78			55.462,8	30	42	Empty	true
Fed	Speckle targeted PIP5K1A-regulated poly A polymerase	30528fed_3_3241	Tityus2_.fasta	88.361,4	0.78	1	1	1	0.000869	0.013	NVFDRTQVSR	K	K	0.957	35.9	27.5	21.2	0	1	0	0	0	2	1221.63			2483900	564	573	Empty	true
Fed	Ras-related protein Rab-1A	05685fasting_3_142	Tityus2_.fasta	22.763,6	0.983	1	1	1	0.000869	0.117	VVDYTTAKEFADQLGIPFLETSAK	K	N	0.997	49.3	25	49.3	2.59	1	0	0	0	2	2643.36			34.290,9	133	156	Empty	true
Fed	unknown protein	00238fasting_3_10821	Tityus2_.fasta	41.925,0	1	3	3	3	0.00261	0.129	LNSYNSFISSLIK	K	N	0.997	77.2	26.2	76.9	1.55	1	0	0	0	2	1485.79			55.660,0	63	75	Empty	true
Fed	unknown protein	00238fasting_3_10821	Tityus2_.fasta	41.925,0	1	3	3	3	0.00261	0.129	RLEQLQKDFDKKDEA	K	L	0.997	0	0	0	5.85	1	0	0	0	1	1862.96			127429	339	353	Empty	true
Fed	unknown protein	00238fasting_3_10821	Tityus2_.fasta	41.925,0	1	3	3	3	0.00261	0.129	SLIGIPEDAKPFYDLESR	K	I	0.997	70.8	25	70.8	4.8	1	0	0	0	2	2050.05			162471	96	113	Empty	true
Fed	Hemocyanin B chain	10939fasting_3_31133	Tityus2_.fasta	73.668,1	1	3	3	3	0.00261	0.0616	FVPIETLLK	K	A	0.997	49.3	25	41.3	2.22	1	0	0	0	2	1059.64			273226	122	130	Empty	true
Fed	Hemocyanin B chain	10939fasting_3_31133	Tityus2_.fasta	73.668,1	1	3	3	3	0.00261	0.0616	IFLAPKFDELGNEIEANELRR	R	L	0.983	0	0	0	2.12	1	0	0	0	2	2474.3			374582	463	483	Empty	true
Fed	Hemocyanin B chain	10939fasting_3_31133	Tityus2_.fasta	73.668,1	1	3	3	3	0.00261	0.0616	LEGLGILGR	R	G	0.997	53.8	25.5	39.3	1.89	1	0	0	0	2	9275624			87.114,4	37	45	Empty	true
Fed	Calcium-transporting ATPase sarcoplasmic-endoplasmic reticulum type	26540fed_2_24694	Tityus2_.fasta	109.900,1	1	2	2	4	0.00348	0.023	EFTLEFSR	K	D	0.997	44	26.8	35.8	2.22	1	0	0	0	2	1028.5			528176	483	490	Empty	true	02437fasting_3_13258
Fed	Calcium-transporting ATPase sarcoplasmic-endoplasmic reticulum type	26540fed_2_24694	Tityus2_.fasta	109.900,1	1	2	2	4	0.00348	0.023	VGEATETALIVLAEK	K	M	0.997	116	25.1	110	7.25	3	0	0	0	2	1543.86			441602	438	452	Empty	true
Fed	40S ribosomal protein S4	23981fed_3_437	Tityus2_.fasta	30.314,0	0.888	1	1	1	0.000869	0.0446	DLAIETAIEAIP	R	-	0.98	27.6	27.5	14.5	1.96	1	0	0	0	2	1255.68			141541	258	269	Empty	true
Fed	Profilin-2	06169fasting_3_51	Tityus2_.fasta	14.381,7	0.983	1	1	1	0.000869	0.0916	TNPNSFTESGIR	R	L	0.997	78.3	27.3	68.7	2.7	1	0	0	0	2	1322.63			458571	56	67	Empty	true
Fed	Cofilin-actin-depolymerizing factor homolog	07702fasting_1_24238	Tityus2_.fasta	16.976,6	1	2	2	2	0.00174	0.243	NATYSDFLDTMQQFK	R	T	0.974	23.7	25	23.7	0.959	1	0	0	0	2	1808.82			9.619,80	46	60	Empty	true
Fed	Cofilin-actin-depolymerizing factor homolog	07702fasting_1_24238	Tityus2_.fasta	16.976,6	1	2	2	2	0.00174	0.243	YVQACDFEEISQEAIEDAFRK	K	G	0.997	22.8	25	22.8	0.62	1	0	0	0	2	2548.17			35.315,5	125	145	Empty	true
Fed	MAM and LDL-receptor class A domain-containing protein C10orf112	23622fed_2_152	Tityus2_.fasta	580.276,3	1	39	41	42	0.0365	0.107	CITGSVICIDKDK	K	V	0.997	83.7	26.6	83.7	3.43	1	0	0	0	2	1508.75			172405	1453	1465	Empty	true
Fed	MAM and LDL-receptor class A domain-containing protein C10orf112	23622fed_2_152	Tityus2_.fasta	580.276,3	1	39	41	42	0.0365	0.107	DGTLDYPLWSIK	K	G	0.997	51.9	27	50.2	1.17	2	0	0	0	2	1407.72			277455	768	779	Empty	true
Fed	MAM and LDL-receptor class A domain-containing protein C10orf112	23622fed_2_152	Tityus2_.fasta	580.276,3	1	39	41	42	0.0365	0.107	DSYGYYAYFTPTK	K	K	0.997	65.4	34.8	0	3.02	1	0	0	0	2	1576.7			150560	544	556	Empty	true
Fed	MAM and LDL-receptor class A domain-containing protein C10orf112	23622fed_2_152	Tityus2_.fasta	580.276,3	1	39	41	42	0.0365	0.107	FIYMYNAQFGDR	K	S	0.997	41.5	25	41.5	2.15	1	0	0	0	2	1524.69			68.798,2	1861	1872	Empty	true
Fed	MAM and LDL-receptor class A domain-containing protein C10orf112	23622fed_2_152	Tityus2_.fasta	580.276,3	1	39	41	42	0.0365	0.107	FRFFYTYSIPSFTHLR	K	Y	0.997	35.8	25	35.8	3.41	1	0	0	0	2	2082.06			124628	2979	2994	Empty	true
Fed	MAM and LDL-receptor class A domain-containing protein C10orf112	23622fed_2_152	Tityus2_.fasta	580.276,3	1	39	41	42	0.0365	0.107	GDIAIDDISFTPACIPLYK	R	V	0.997	88.8	25	83.8	8.85	1	0	0	0	2	2109.06			69.117,9	3472	3490	Empty	true
Fed	MAM and LDL-receptor class A domain-containing protein C10orf112	23622fed_2_152	Tityus2_.fasta	580.276,3	1	39	41	42	0.0365	0.107	GIAVDDIVLSK	R	Y	0.997	65.2	27	55.3	1.05	1	0	0	0	2	1129.65			980729	2133	2143	Empty	true
Fed	MAM and LDL-receptor class A domain-containing protein C10orf112	23622fed_2_152	Tityus2_.fasta	580.276,3	1	39	41	42	0.0365	0.107	GSIGDYWIR	K	S	0.997	75.4	28.5	68.3	2.52	1	0	0	0	2	1066.53			546958	3866	3874	Empty	true
Fed	MAM and LDL-receptor class A domain-containing protein C10orf112	23622fed_2_152	Tityus2_.fasta	580.276,3	1	39	41	42	0.0365	0.107	GTLSDIAIDDISIKDELCSPVQDK	K	K	0.997	67.6	25	67.6	5.46	1	0	0	0	2	2632.3			101003	994	1017	Empty	true
Fed	MAM and LDL-receptor class A domain-containing protein C10orf112	23622fed_2_152	Tityus2_.fasta	580.276,3	1	39	41	42	0.0365	0.107	GYYIYVK	K	A	0.988	20.2	30.1	11	1.7	1	0	0	0	2	9054767			264739	878	884	Empty	true
Fed	MAM and LDL-receptor class A domain-containing protein C10orf112	23622fed_2_152	Tityus2_.fasta	580.276,3	1	39	41	42	0.0365	0.107	HSDILEVLK	K	L	0.997	82	26.3	69.5	8.11	1	0	0	0	2	1053.59			254427	247	255	Empty	true
Fed	MAM and LDL-receptor class A domain-containing protein C10orf112	23622fed_2_152	Tityus2_.fasta	580.276,3	1	39	41	42	0.0365	0.107	IALISSTTFLPTFAK	R	D	0.997	92.1	25	81.8	5.02	1	0	0	0	2	1609.92			361619	3387	3401	Empty	true
Fed	MAM and LDL-receptor class A domain-containing protein C10orf112	23622fed_2_152	Tityus2_.fasta	580.276,3	1	39	41	42	0.0365	0.107	KEPFSLSFSR	R	V	0.997	58.3	27.1	34.3	1.47	1	0	0	0	2	1197.63			305065	3673	3682	Empty	true
Fed	MAM and LDL-receptor class A domain-containing protein C10orf112	23622fed_2_152	Tityus2_.fasta	580.276,3	1	39	41	42	0.0365	0.107	LLSPFLTSK	R	N	0.997	47.9	25.7	32.6	2.08	2	0	0	0	2	1005.6			1032520	2554	2562	Empty	true
Fed	MAM and LDL-receptor class A domain-containing protein C10orf112	23622fed_2_152	Tityus2_.fasta	580.276,3	1	39	41	42	0.0365	0.107	LNFNVLIEGK	K	Q	0.997	92.3	27.2	67	4.17	1	0	0	0	2	1146.65			171913	3456	3465	Empty	true
Fed	MAM and LDL-receptor class A domain-containing protein C10orf112	23622fed_2_152	Tityus2_.fasta	580.276,3	1	39	41	42	0.0365	0.107	LNFWFYMLSDSR	R	G	0.997	33.2	25.1	27.9	1.19	1	0	0	0	2	1594.74			12.132,2	2769	2780	Empty	true
Fed	MAM and LDL-receptor class A domain-containing protein C10orf112	23622fed_2_152	Tityus2_.fasta	580.276,3	1	39	41	42	0.0365	0.107	LNIDNGYQILLIGTTK	K	G	0.997	98.8	25	98.8	5.8	1	0	0	0	2	1775.99			56.697,1	978	993	Empty	true
Fed	MAM and LDL-receptor class A domain-containing protein C10orf112	23622fed_2_152	Tityus2_.fasta	580.276,3	1	39	41	42	0.0365	0.107	LTVPLSVK	R	L	0.973	42.4	25	30.8	0	1	0	0	0	2	8565503			475985	3448	3455	Empty	true
Fed	MAM and LDL-receptor class A domain-containing protein C10orf112	23622fed_2_152	Tityus2_.fasta	580.276,3	1	39	41	42	0.0365	0.107	LVTDMPLAYK	K	L	0.997	65.7	27.5	50.6	3.29	1	0	0	0	2	1150.62			508423	451	460	Empty	true
Fed	MAM and LDL-receptor class A domain-containing protein C10orf112	23622fed_2_152	Tityus2_.fasta	580.276,3	1	39	41	42	0.0365	0.107	LYIVGEK	K	D	0.988	23.5	27.6	12.5	2.04	1	0	0	0	2	8214768			257457	461	467	Empty	true
Fed	MAM and LDL-receptor class A domain-containing protein C10orf112	23622fed_2_152	Tityus2_.fasta	580.276,3	1	39	41	42	0.0365	0.107	NLVGILESEYFELTNDR	R	C	0.997	91.5	25	91.5	9.34	1	0	0	0	2	2012			124373	904	920	Empty	true
Fed	MAM and LDL-receptor class A domain-containing protein C10orf112	23622fed_2_152	Tityus2_.fasta	580.276,3	1	39	41	42	0.0365	0.107	NYGTDFEWR	K	I	0.997	32.4	25	32.4	4.8	1	0	0	0	2	1187.51			190564	30	38	Empty	true
Fed	MAM and LDL-receptor class A domain-containing protein C10orf112	23622fed_2_152	Tityus2_.fasta	580.276,3	1	39	41	42	0.0365	0.107	QDQEGPWDIRWTTSTIFGQYYEK	R	V	0.997	175	25	175	14.2	1	0	0	0	2	2848.32			147441	3010	3032	Empty	true
Fed	MAM and LDL-receptor class A domain-containing protein C10orf112	23622fed_2_152	Tityus2_.fasta	580.276,3	1	39	41	42	0.0365	0.107	SIFDDGPK	R	S	0.973	44.5	29.8	34	0	1	0	0	0	2	8784256			377033	45	52	Empty	true
Fed	MAM and LDL-receptor class A domain-containing protein C10orf112	23622fed_2_152	Tityus2_.fasta	580.276,3	1	39	41	42	0.0365	0.107	SLDKYYIVIEAR	K	R	0.997	61.4	25.7	57.2	7.06	1	0	0	0	2	1469.8			350767	1940	1951	Empty	true
Fed	MAM and LDL-receptor class A domain-containing protein C10orf112	23622fed_2_152	Tityus2_.fasta	580.276,3	1	39	41	42	0.0365	0.107	SNANLAVNKWTEFVSK	K	I	0.997	98.6	25	96	3.62	1	0	0	0	2	1807.93			223047	1592	1607	Empty	true
Fed	MAM and LDL-receptor class A domain-containing protein C10orf112	23622fed_2_152	Tityus2_.fasta	580.276,3	1	39	41	42	0.0365	0.107	SPDYISWEWLDGSTSNPQTGPEFDHTFGTK	K	D	0.997	208	25	208	20.1	1	0	0	0	2	3399.51			331252	679	708	Empty	true
Fed	MAM and LDL-receptor class A domain-containing protein C10orf112	23622fed_2_152	Tityus2_.fasta	580.276,3	1	39	41	42	0.0365	0.107	STGESPFNGEKPETDHTTNTVTGK	R	F	0.997	107	25	107	10.5	1	0	0	0	2	2534.16			905358	1837	1860	Empty	true
Fed	MAM and LDL-receptor class A domain-containing protein C10orf112	23622fed_2_152	Tityus2_.fasta	580.276,3	1	39	41	42	0.0365	0.107	TCDFKDDCPTGADER	K	T	0.997	79.8	25	79.8	6.23	1	0	0	0	2	1786.7			293430	3523	3537	Empty	true
Fed	MAM and LDL-receptor class A domain-containing protein C10orf112	23622fed_2_152	Tityus2_.fasta	580.276,3	1	39	41	42	0.0365	0.107	TDSEIRLENNVPIFSK	R	I	0.997	83	25	78	7.8	1	0	0	0	2	1861.97			489923	1908	1923	Empty	true
Fed	MAM and LDL-receptor class A domain-containing protein C10orf112	23622fed_2_152	Tityus2_.fasta	580.276,3	1	39	41	42	0.0365	0.107	TGLDTNFGEGPLNDHSLSSVQAHYMYAYLTGQEEK	R	I	0.997	120	25	120	8.26	1	0	0	0	2	3872.77			183442	2009	2043	Empty	true
Fed	MAM and LDL-receptor class A domain-containing protein C10orf112	23622fed_2_152	Tityus2_.fasta	580.276,3	1	39	41	42	0.0365	0.107	TTISLWK	K	E	0.988	41	29.3	23.4	1.33	1	0	0	0	2	8484877			570557	262	268	Empty	true
Fed	MAM and LDL-receptor class A domain-containing protein C10orf112	23622fed_2_152	Tityus2_.fasta	580.276,3	1	39	41	42	0.0365	0.107	VSGSESGSLFR	R	L	0.957	29.2	27.5	28.7	0	1	0	0	0	2	1125.55			519002	351	361	Empty	true
Fed	MAM and LDL-receptor class A domain-containing protein C10orf112	23622fed_2_152	Tityus2_.fasta	580.276,3	1	39	41	42	0.0365	0.107	WTTSTIFGQYYEK	R	V	0.997	90.4	25.8	90.4	7.72	1	0	0	0	2	1623.77			159818	3020	3032	Empty	true
Fed	MAM and LDL-receptor class A domain-containing protein C10orf112	23622fed_2_152	Tityus2_.fasta	580.276,3	1	39	41	42	0.0365	0.107	YADFIALDDISLR	R	G	0.997	39.4	26.6	37.7	2.1	1	0	0	0	2	1511.77			98.802,1	3897	3909	Empty	true
Fed	MAM and LDL-receptor class A domain-containing protein C10orf112	23622fed_2_152	Tityus2_.fasta	580.276,3	1	39	41	42	0.0365	0.107	YIFQAVMGK	R	S	0.997	48.7	28	43	1.41	2	0	0	0	2	1056.55			641654	2461	2469	Empty	true
Fed	MAM and LDL-receptor class A domain-containing protein C10orf112	23622fed_2_152	Tityus2_.fasta	580.276,3	1	39	41	42	0.0365	0.107	YSDYQGQGPLTIYTR	R	Q	0.997	109	25.2	109	11	1	0	0	0	2	1761.84			291045	2995	3009	Empty	true
Fed	MAM and LDL-receptor class A domain-containing protein C10orf112	23622fed_2_152	Tityus2_.fasta	580.276,3	1	39	41	42	0.0365	0.107	YSNSIVPIWSEKGDEGDEWHAAQVSVTPTSSEPFR	K	Y	0.997	98.2	25	98.2	15.4	1	0	0	0	2	3905.83			563208	2426	2460	Empty	true
Fed	MAM and LDL-receptor class A domain-containing protein C10orf112	23622fed_2_152	Tityus2_.fasta	580.276,3	1	39	41	42	0.0365	0.107	YYYNSNSGWNR	R	K	0.997	81.3	25	81.3	4.18	1	0	0	0	2	1423.6			429042	1068	1078	Empty	true
Fed	Hemocyanin AA6 chain	10337fasting_2_29538,29086fed_2_1376	Tityus2_.fasta	71.794,0	1	7	7	7	0.00608	0.161	EKLPVSERDDRLK	R	G	0.997	0	0	0	3.26	1	0	0	0	2	1584.87			273579	23	35	Empty	true
Fed	Hemocyanin AA6 chain	10337fasting_2_29538,29086fed_2_1376	Tityus2_.fasta	71.794,0	1	7	7	7	0.00608	0.161	ESELELSHGINFGSDQSVK	K	V	0.997	106	25	106	7.25	1	0	0	0	2	2075.99			378163	410	428	Empty	true
Fed	Hemocyanin AA6 chain	10337fasting_2_29538,29086fed_2_1376	Tityus2_.fasta	71.794,0	1	7	7	7	0.00608	0.161	FIDNIFQEYK	R	C	0.997	74.9	27.4	63.5	3.02	1	0	0	0	2	1316.65			186041	364	373	Empty	true
Fed	Hemocyanin AA6 chain	10337fasting_2_29538,29086fed_2_1376	Tityus2_.fasta	71.794,0	1	7	7	7	0.00608	0.161	FIPTETINLANK	R	E	0.997	27.6	26.1	25.7	1.37	1	0	0	0	2	1360.75			443474	119	130	Empty	true
Fed	Hemocyanin AA6 chain	10337fasting_2_29538,29086fed_2_1376	Tityus2_.fasta	71.794,0	1	7	7	7	0.00608	0.161	GLTVPPIQEVFPDR	K	F	0.997	60.8	25.6	56.2	1.16	1	0	0	0	2	1567.85			160271	105	118	Empty	true
Fed	Hemocyanin AA6 chain	10337fasting_2_29538,29086fed_2_1376	Tityus2_.fasta	71.794,0	1	7	7	7	0.00608	0.161	IPLDVEHGTDILGDIIESSDESK	K	N	0.997	66.2	25	66.2	11.2	1	0	0	0	2	2482.22			179590	291	313	Empty	true
Fed	Hemocyanin AA6 chain	10337fasting_2_29538,29086fed_2_1376	Tityus2_.fasta	71.794,0	1	7	7	7	0.00608	0.161	TPNVVTTLTK	K	E	0.997	45.1	27.7	44.2	4.92	1	0	0	0	2	1073.62			306055	400	409	Empty	true
Fed	Heat shock cognate 71 kDa protein	23592fed_1_123	Tityus2_.fasta	75.580,3	1	2	2	2	0.00174	0.0378	IINEPTAAAIAYGLDKK	R	G	0.997	107	25	107	4.89	1	0	0	0	2	1787.99			71.950,3	172	188	Empty	true	00257fasting_3_10844,30901fed_3_3814,14712fasting_3_3820
Fed	Heat shock cognate 71 kDa protein	23592fed_1_123	Tityus2_.fasta	75.580,3	1	2	2	2	0.00174	0.0378	LIGDAAKNQ	R	V	0.946	0	0	0	0.721	1	0	0	0	1	9295052			238978	50	58	Empty	true	30901fed_3_3814,14712fasting_3_3820
Fed	Trifunctional purine biosynthetic protein adenosine-3	06372fasting_3_662,23730fed_2_236	Tityus2_.fasta	46.774,3	0.994	1	1	1	0.000869	0.03	IVFHAGTNILQNK	R	V	0.997	78.4	25	75.3	6.06	1	0	0	0	2	1454.81			226681	366	378	Empty	true
Fed	Myelin expression factor 2	27015fed_2_25323	Tityus2_.fasta	47.590,9	0.983	1	1	1	0.000869	0.0224	VISIELKTDK	K	E	0.997	36.9	25.5	25.8	2.55	1	0	0	0	2	1145.68			834277	236	245	Empty	true
Fed	Ras GTPase-activating protein 3	17523fed_1_10020	Tityus2_.fasta	95.851,0	0.999	1	1	1	0.000869	0.00839	KIVSFLK	R	A	0.988	44.6	25	0	3.72	1	0	0	0	2	8345448			411964	347	353	Empty	true
Fed	MAM and LDL-receptor class A domain-containing protein C10orf112	19500fed_1_12131	Tityus2_.fasta	73.429,4	1	4	4	4	0.00348	0.0563	DGWFAVLSGK	K	K	0.997	44.1	28.6	34.7	1.43	1	0	0	0	2	1079.55			168922	517	526	Empty	true
Fed	MAM and LDL-receptor class A domain-containing protein C10orf112	19500fed_1_12131	Tityus2_.fasta	73.429,4	1	4	4	4	0.00348	0.0563	FLYFFGER	K	N	0.997	44.6	28.6	36.9	2.12	1	0	0	0	2	1078.54			380998	297	304	Empty	true
Fed	MAM and LDL-receptor class A domain-containing protein C10orf112	19500fed_1_12131	Tityus2_.fasta	73.429,4	1	4	4	4	0.00348	0.0563	MFLEIKR	K	N	0.988	30.4	27	20.4	0.854	1	0	0	0	2	9525286			169929	581	587	Empty	true
Fed	MAM and LDL-receptor class A domain-containing protein C10orf112	19500fed_1_12131	Tityus2_.fasta	73.429,4	1	4	4	4	0.00348	0.0563	WTLQSGFSQLK	K	K	0.997	69.6	27.6	62.5	3.66	1	0	0	0	2	1294.68			226613	271	281	Empty	true
Fed	Apical endosomal glycoprotein	13927fasting_1_2788	Tityus2_.fasta	169.557,3	1	12	12	12	0.0104	0.118	AFSTLWQR	K	N	0.997	35.8	28.9	32.9	1.72	1	0	0	0	2	1008.53			463443	1142	1149	Empty	true
Fed	Apical endosomal glycoprotein	13927fasting_1_2788	Tityus2_.fasta	169.557,3	1	12	12	12	0.0104	0.118	ENSDHNYYWLR	K	G	0.997	71.5	25	71.5	4.55	1	0	0	0	2	1496.66			363747	705	715	Empty	true
Fed	Apical endosomal glycoprotein	13927fasting_1_2788	Tityus2_.fasta	169.557,3	1	12	12	12	0.0104	0.118	GIIPLYSEVKEYQVIFEGIVGNGNK	R	G	0.997	84.8	25	84.8	10.7	1	0	0	0	2	2766.47			225559	470	494	Empty	true
Fed	Apical endosomal glycoprotein	13927fasting_1_2788	Tityus2_.fasta	169.557,3	1	12	12	12	0.0104	0.118	GTSNEFELAIDDLK	K	L	0.997	70.7	26.8	70.7	4.8	1	0	0	0	2	1551.75			64.774,3	829	842	Empty	true
Fed	Apical endosomal glycoprotein	13927fasting_1_2788	Tityus2_.fasta	169.557,3	1	12	12	12	0.0104	0.118	IGTCPESGSCTFEENLCTWSHGEGNLTWLR	K	N	0.997	142	25	142	12.1	1	0	0	0	2	3498.51			107259	344	373	Empty	true
Fed	Apical endosomal glycoprotein	13927fasting_1_2788	Tityus2_.fasta	169.557,3	1	12	12	12	0.0104	0.118	LDHTTGTDYGYYLQAK	K	S	0.997	44.6	25	44.6	4.01	1	0	0	0	2	1845.87			439280	725	740	Empty	true
Fed	Apical endosomal glycoprotein	13927fasting_1_2788	Tityus2_.fasta	169.557,3	1	12	12	12	0.0104	0.118	LESDTFPSLK	R	N	0.997	58.5	28.5	39.6	0.824	1	0	0	0	2	1136.58			332040	413	422	Empty	true
Fed	Apical endosomal glycoprotein	13927fasting_1_2788	Tityus2_.fasta	169.557,3	1	12	12	12	0.0104	0.118	LTLWWQIVK	K	R	0.989	35.8	25.7	33.3	0	1	0	0	0	2	1186.7			51.027,5	1058	1066	Empty	true
Fed	Apical endosomal glycoprotein	13927fasting_1_2788	Tityus2_.fasta	169.557,3	1	12	12	12	0.0104	0.118	MNMLDDNFEWIR	Y	H	0.997	87.2	34.1	77.9	4.4	1	0	0	0	1	1583.7			47.991,9	1400	1411	Empty	true
Fed	Apical endosomal glycoprotein	13927fasting_1_2788	Tityus2_.fasta	169.557,3	1	12	12	12	0.0104	0.118	VFPLKADLYNLELAK	K	A	0.997	79.7	25	79.7	4.82	1	0	0	0	2	1733.98			52.451,2	511	525	Empty	true
Fed	Apical endosomal glycoprotein	13927fasting_1_2788	Tityus2_.fasta	169.557,3	1	12	12	12	0.0104	0.118	VQNFELVK	R	I	0.973	61.9	28.6	48.8	0	1	0	0	0	2	9765462			529380	881	888	Empty	true
Fed	Apical endosomal glycoprotein	13927fasting_1_2788	Tityus2_.fasta	169.557,3	1	12	12	12	0.0104	0.118	YEICDFETDLCGWTPK	K	E	0.997	93.2	25	93.2	8.44	1	0	0	0	2	2033.86			91.741,7	689	704	Empty	true
Fed	Homogentisate 1,2-dioxygenase	23688fed_1_201	Tityus2_.fasta	52.511,1	0.983	1	1	1	0.000869	0.0238	GNLFVITEFGR	K	M	0.997	45.8	27.7	41.9	3.39	1	0	0	0	2	1252.67			187397	162	172	Empty	true
Fed	Retinal dehydrogenase 2	05718fasting_1_17	Tityus2_.fasta	55.637,6	0.991	1	1	1	0.000869	0.0137	FADLLER	K	D	0.988	55.5	30.2	35.2	2.59	1	0	0	0	2	8634622			390519	105	111	Empty	true	24211fed_2_62,23947fed_2_401
Fed	L-like cysteine peptidase 1	33787Fed_cathepsin	Tityus2_.fasta	21.742,8	1	3	3	3	0.00261	0.197	LVSLSEQNLVDCSQK	K	Q	0.997	114	25.5	0	8.18	1	0	0	0	2	1719.86			815717	25	39	Empty	true
Fed	L-like cysteine peptidase 1	33787Fed_cathepsin	Tityus2_.fasta	21.742,8	1	3	3	3	0.00261	0.197	NSWGTSWGIK	K	G	0.997	52.8	28.6	51.9	1.02	1	0	0	0	2	1135.55			426201	165	174	Empty	true
Fed	L-like cysteine peptidase 1	33787Fed_cathepsin	Tityus2_.fasta	21.742,8	1	3	3	3	0.00261	0.197	QSVGATCTGYVDVK	R	S	0.997	131	25.6	115	8.66	1	0	0	0	2	1484.71			937715	83	96	Empty	true
Fed	Fumarylacetoacetase	15148fasting_3_4542	Tityus2_.fasta	50.929,5	0.983	1	1	1	0.000869	0.0417	ASSVVVSGTPIHRPHGQTR	R	A	0.997	55.1	25	55.1	4.89	1	0	0	0	2	1986.06			154926	163	181	Empty	true
Fed	Calreticulin	06327fasting_1_621	Tityus2_.fasta	31.059,4	0.983	1	1	1	0.000869	0.0487	WIPSEHKGNELGK	R	F	0.997	42.6	26.7	38.2	1.77	1	0	0	0	2	1494.77			107723	36	48	Empty	true
Fed	Glutathione S-transferase D5	06668fasting_3_9	Tityus2_.fasta	21.792,2	0.987	1	1	1	0.000869	0.0421	FLDGFLEK	K	S	0.973	32.2	27.8	26.3	0	1	0	0	0	2	9685089			118418	140	147	Empty	true	23723fed_1_232
Fed	Hemocyanin F chain	02750fasting_2_13777,19977fed_1_12930	Tityus2_.fasta	72.730,8	1	4	4	4	0.00348	0.0778	DFNDFIHLCEQAR	K	D	0.997	66.6	25	66.6	2.64	1	0	0	0	2	1664.75			240348	69	81	Empty	true
Fed	Hemocyanin F chain	02750fasting_2_13777,19977fed_1_12930	Tityus2_.fasta	72.730,8	1	4	4	4	0.00348	0.0778	FIPAETINAALK	R	A	0.997	47.4	26.1	36.1	0.658	1	0	0	0	2	1287.73			523107	119	130	Empty	true
Fed	Hemocyanin F chain	02750fasting_2_13777,19977fed_1_12930	Tityus2_.fasta	72.730,8	1	4	4	4	0.00348	0.0778	IIPLFEHLTSLTR	R	K	0.997	68.7	25	63.6	5.09	1	0	0	0	2	1539.89			61.384,0	10	22	Empty	true
Fed	Hemocyanin F chain	02750fasting_2_13777,19977fed_1_12930	Tityus2_.fasta	72.730,8	1	4	4	4	0.00348	0.0778	TGPDSIYVEIK	R	E	0.997	92.5	28	86.4	5.8	1	0	0	0	2	1221.64			524158	136	146	Empty	true
Fed	PH and SEC7 domain-containing protein 2	24525fed_3_879	Tityus2_.fasta	7.785,1	0.983	1	1	1	0.000869	0.145	LCPPKLFFNK	R	S	0.997	69.1	27.4	60.4	3	1	0	0	0	2	1263.69			243876	47	56	Empty	true
Fed	Glutathione synthetase	14549fasting_2_3615	Tityus2_.fasta	53.554,1	1	2	2	2	0.00174	0.0761	EREGYILMDLINSP	K	S	0.949	0	0	0	0.824	1	0	0	0	1	1649.82			137877	390	403	Empty	true
Fed	Glutathione synthetase	14549fasting_2_3615	Tityus2_.fasta	53.554,1	1	2	2	2	0.00174	0.0761	SIQTDINAVIHNVAYDDKFLTK	K	T	0.997	74.5	25	74.5	4.44	1	0	0	0	2	2505.3			71.593,7	64	85	Empty	true
Fed	Rab GDP dissociation inhibitor alpha	23774fed_3_267	Tityus2_.fasta	50.214,1	1	4	4	4	0.00348	0.172	GTGEDFDFSK	R	V	0.997	73.5	25	73.3	1.96	1	0	0	0	2	1102.47			250090	424	433	Empty	true
Fed	Rab GDP dissociation inhibitor alpha	23774fed_3_267	Tityus2_.fasta	50.214,1	1	4	4	4	0.00348	0.172	LSAIYGGTYMLDKPIDEIVLEDGKVVGVR	R	S	0.997	91.4	25	91.4	8.47	1	0	0	0	2	3150.68			215570	241	269	Empty	true
Fed	Rab GDP dissociation inhibitor alpha	23774fed_3_267	Tityus2_.fasta	50.214,1	1	4	4	4	0.00348	0.172	SPYLYPLYGLGELPQGFAR	K	L	0.997	54.3	25	51.9	5.47	1	0	0	0	2	2141.11			39.541,9	222	240	Empty	true
Fed	Rab GDP dissociation inhibitor alpha	23774fed_3_267	Tityus2_.fasta	50.214,1	1	4	4	4	0.00348	0.172	YYGGESASITPLEELFAK	K	F	0.997	92.4	25.1	92.4	8.36	1	0	0	0	2	1974.97			66.885,0	38	55	Empty	true
Fed	Pyruvate kinase muscle isozyme	18349fed_1_10849	Tityus2_.fasta	59.252,5	0.983	1	1	1	0.000869	0.0312	GDLGIEIPPEKVFLAQK	R	M	0.997	43.6	25	43.6	2.51	1	0	0	0	2	1854.04			166648	289	305	Empty	true
Fed	23666fed_2_19-DECOY Calreticulin	23666fed_2_19-DECOY		0,0	1	2	2	2	0.00174	0	QEDKMKREADK	D	T	0.968	0	0	0	2	1	0	0	0	1	1360.65			355620	0	0	Empty	true
Fed	23666fed_2_19-DECOY Calreticulin	23666fed_2_19-DECOY		0,0	1	2	2	2	0.00174	0	TSGWTEEGVK	K	Q	0.997	0	0	0	5.52	1	0	0	0	2	1093.52			229857	0	0	Empty	true
Fed	Hemocyanin II	10999fasting_2_31207	Tityus2_.fasta	72.662,2	1	4	4	4	0.00348	0.108	ASTKPAGDESPIVVDVK	K	E	0.997	69.2	25.6	67.7	3.8	1	0	0	0	2	1712.91			278090	134	150	Empty	true
Fed	Hemocyanin II	10999fasting_2_31207	Tityus2_.fasta	72.662,2	1	4	4	4	0.00348	0.108	EQLSFPGVDVVDIR	K	V	0.997	56.7	26.5	41.2	3.68	1	0	0	0	2	1573.82			216792	386	399	Empty	true
Fed	Hemocyanin II	10999fasting_2_31207	Tityus2_.fasta	72.662,2	1	4	4	4	0.00348	0.108	EVALDEEHGADILGDLIESSYESK	K	N	0.997	67.6	25	67.6	5.09	1	0	0	0	2	2619.23			84.342,4	294	317	Empty	true
Fed	Hemocyanin II	10999fasting_2_31207	Tityus2_.fasta	72.662,2	1	4	4	4	0.00348	0.108	FVPAATMAEILSK	R	A	0.997	97.1	27.4	87.2	4.09	1	0	0	0	2	1377.74			222167	121	133	Empty	true
Fed	Zinc finger CCCH-type with G patch domain-containing protein	02385fasting_2_13173	Tityus2_.fasta	59.777,7	0.949	1	1	1	0.000869	0.0135	KDLLTLK	R	S	0.988	69.8	29.5	20	1.59	1	0	0	0	2	8305348			596696	44	50	Empty	true
Fed	Soma ferritin	04840fasting_3_18432,22868fed_3_19124	Tityus2_.fasta	19.256,8	1	3	3	29	0.0252	0.131	KIGDHVTNLK	K	R	0.994	58.5	37.2	31.3	0	1	0	0	0	2	1164.67			1505920	143	152	Empty	true
Fed	Soma ferritin	04840fasting_3_18432,22868fed_3_19124	Tityus2_.fasta	19.256,8	1	3	3	29	0.0252	0.131	KIGDHVTNLKR	K	V	0.997	90.7	37.3	40	0	11	0	0	0	2	1320.77			18232200	143	153	Empty	true
Fed	Soma ferritin	04840fasting_3_18432,22868fed_3_19124	Tityus2_.fasta	19.256,8	1	3	3	29	0.0252	0.131	TVNQSLLDLHK	K	V	0.997	77.4	36.5	15.5	0	17	0	0	0	2	1251.71			32605100	105	115	Empty	true
Fed	WD repeat domain phosphoinositide-interacting protein 2	24478fed_1_835	Tityus2_.fasta	49.764,6	1	3	3	3	0.00261	0.098	GLCSLSINTDR	R	C	0.997	52.7	28.4	51.8	4.92	1	0	0	0	2	1235.61			357913	141	151	Empty	true
Fed	WD repeat domain phosphoinositide-interacting protein 2	24478fed_1_835	Tityus2_.fasta	49.764,6	1	3	3	3	0.00261	0.098	LMIPAHDNPLAALAFDPNGTK	K	L	0.997	54.9	25	54.5	6.23	1	0	0	0	2	2206.13			32.206,6	177	197	Empty	true
Fed	WD repeat domain phosphoinositide-interacting protein 2	24478fed_1_835	Tityus2_.fasta	49.764,6	1	3	3	3	0.00261	0.098	VLHTIRDTPPNPR	K	G	0.997	54.6	25.1	51.9	1.52	1	0	0	0	2	1515.84			101046	128	140	Empty	true
Fed	Speckle targeted PIP5K1A-regulated poly A polymerase	30528fed_3_3241	Tityus2_.fasta	88.361,4	0.993	1	1	1	0.000946	0.013	NVFDRTQVSR	K	K	0.988	35.9	27.5	20.5	0	1	0	0	0	2	1221.63			3760640	564	573	Empty	true
Fed	Zinc finger CCCH-type with G patch domain-containing protein	02385fasting_2_13173	Tityus2_.fasta	59.777,7	0.996	1	1	1	0.000946	0.0135	KDLLTLK	R	S	0.988	69.8	29.5	20	1.01	1	0	0	0	2	8305348			727742	44	50	Empty	true
Fed	Homogentisate 1,2-dioxygenase	23688fed_1_201	Tityus2_.fasta	52.511,1	1	1	1	1	0.000946	0.0562	GQNSPQVCPYGLYAEQLSGTAFTAPR	K	E	0.997	11.8	25	11.8	2.2	1	0	0	0	2	2812.34			116563	29	54	Empty	true
Fed	Calreticulin	23666fed_2_19	Tityus2_.fasta	43.288,8	0.981	1	1	1	0.000946	0.078	SGTIFDNVLITDDEDFAQKVGEETWGSTK	K	D	0.997	58.6	25	58.6	4.6	1	0	0	0	2	3202.51			120827	286	314	Empty	true
Fed	Pyruvate kinase muscle isozyme	18349fed_1_10849	Tityus2_.fasta	59.252,5	0.999	1	1	1	0.000946	0.0312	GDLGIEIPPEKVFLAQK	R	M	0.997	51.4	25	51.4	3.8	1	0	0	0	2	1854.04			281412	289	305	Empty	true
Fed	Myelin expression factor 2	27015fed_2_25323	Tityus2_.fasta	47.590,9	0.981	1	1	1	0.000946	0.0224	VISIELKTDK	K	E	0.997	37.5	25.5	26.1	0.886	1	0	0	0	2	1145.68			684075	236	245	Empty	true
Fed	cathepsin L-like cysteine peptidase 4	33783Fed_15067	Tityus2_.fasta	37.615,7	0.999	1	1	1	0.000946	0.0455	LVSLSEQNLVDCSKK	K	D	0.997	114	25.6	0	8.64	1	0	0	0	2	1719.89			574098	160	174	Empty	true
Fed	unknown protein	06268fasting_2_579,23287fed_3_20624	Tityus2_.fasta	33.500,7	0.999	1	1	1	0.000946	0.0261	LDAAIQFK	K	I	0.997	52.2	29.4	42.4	0.569	1	0	0	0	2	9055092			697693	118	125	Empty	true
Fed	Phosphoribosylformylglycinamidine synthase	00735fasting_3_11189,24419fed_1_79	Tityus2_.fasta	145.611,0	1	2	2	2	0.00189	0.019	ESHRPSSFITHSGVR	K	H	0.997	68.4	25.7	66.7	3.62	1	0	0	0	2	1696.85			157897	293	307	Empty	true
Fed	Phosphoribosylformylglycinamidine synthase	00735fasting_3_11189,24419fed_1_79	Tityus2_.fasta	145.611,0	1	2	2	2	0.00189	0.019	HLAMMPHPER	R	C	0.997	60.3	26.8	51.3	4.77	1	0	0	0	2	1218.59			98.695,0	1273	1282	Empty	true
Fed	Profilin-2	06169fasting_3_51	Tityus2_.fasta	14.381,7	0.981	1	1	1	0.000946	0.0916	TNPNSFTESGIR	R	L	0.997	78.9	27.2	68.5	2.6	1	0	0	0	2	1322.63			431330	56	67	Empty	true
Fed	Ras GTPase-activating protein 3	17523fed_1_10020	Tityus2_.fasta	95.851,0	1	2	2	2	0.00189	0.0204	KIVSFLK	R	A	0.988	44.9	25	0	4.04	1	0	0	0	2	8345448			1052650	347	353	Empty	true
Fed	Ras GTPase-activating protein 3	17523fed_1_10020	Tityus2_.fasta	95.851,0	1	2	2	2	0.00189	0.0204	LEQDHKQYFR	R	N	0.961	45.9	36.3	14.3	0	1	0	0	0	2	1283.64			2504780	795	804	Empty	true
Fed	Tumor necrosis factor alpha-induced protein 8-like protein	16039fasting_1_5834	Tityus2_.fasta	21.541,8	0.981	1	1	1	0.000946	0.0479	SLLKDLVVR	R	H	0.997	59.7	25.7	45.2	3.21	1	0	0	0	2	1042.66			673754	127	135	Empty	true
Fed	Hemocyanin AA6 chain	10337fasting_2_29538,29086fed_2_1376	Tityus2_.fasta	71.794,0	1	3	3	3	0.00284	0.0654	EKLPVSERDDRLK	R	G	0.977	0	0	0	2.72	1	0	0	0	2	1584.87			279875	23	35	Empty	true
Fed	Hemocyanin AA6 chain	10337fasting_2_29538,29086fed_2_1376	Tityus2_.fasta	71.794,0	1	3	3	3	0.00284	0.0654	FIPTETINLANK	R	E	0.996	11	26.1	7.65	0.745	1	0	0	0	2	1360.75			255177	119	130	Empty	true
Fed	Hemocyanin AA6 chain	10337fasting_2_29538,29086fed_2_1376	Tityus2_.fasta	71.794,0	1	3	3	3	0.00284	0.0654	LFIELDKFYATLAAGK	R	T	0.997	104	25	92.3	5.39	1	0	0	0	2	1799.99			42.872,8	480	495	Empty	true
Fed	Hemocyanin II	10999fasting_2_31207	Tityus2_.fasta	72.662,2	0.981	1	1	1	0.000946	0.0364	HLYEVFYEAKDFDDFVHLAQEAR	R	T	0.997	106	25	106	16	1	0	0	0	2	2842.35			91.677,7	61	83	Empty	true
Fed	Glutathione synthetase	14549fasting_2_3615	Tityus2_.fasta	53.554,1	1	1	1	1	0.000946	0.0465	SIQTDINAVIHNVAYDDKFLTK	K	T	0.997	130	25	130	9.11	1	0	0	0	2	2505.3			143478	64	85	Empty	true
Fed	WD repeat domain phosphoinositide-interacting protein 2	24478fed_1_835	Tityus2_.fasta	49.764,6	1	3	3	3	0.00284	0.098	GLCSLSINTDR	R	C	0.997	40	28.4	37.3	3.82	1	0	0	0	2	1235.61			243839	141	151	Empty	true
Fed	WD repeat domain phosphoinositide-interacting protein 2	24478fed_1_835	Tityus2_.fasta	49.764,6	1	3	3	3	0.00284	0.098	LMIPAHDNPLAALAFDPNGTK	K	L	0.997	49.6	25	49.6	4.41	1	0	0	0	2	2206.13			51.746,3	177	197	Empty	true
Fed	WD repeat domain phosphoinositide-interacting protein 2	24478fed_1_835	Tityus2_.fasta	49.764,6	1	3	3	3	0.00284	0.098	VLHTIRDTPPNPR	K	G	0.997	41	25.1	38.8	1.54	1	0	0	0	2	1515.84			156239	128	140	Empty	true
Fed	Hemocyanin AA6 chain	04165fasting_1_16742,27819fed_3_26963	Tityus2_.fasta	71.668,1	1	6	6	6	0.00568	0.155	DLDEATKLYEILYHAKDFDDFYLLAK	K	Q	0.997	0	0	0	7.77	1	0	0	0	2	3149.57			110577	53	78	Empty	true
Fed	Hemocyanin AA6 chain	04165fasting_1_16742,27819fed_3_26963	Tityus2_.fasta	71.668,1	1	6	6	6	0.00568	0.155	FVDNIFQDYK	R	A	0.997	74.3	27.4	68.1	5.74	1	0	0	0	2	1288.62			189409	363	372	Empty	true
Fed	Hemocyanin AA6 chain	04165fasting_1_16742,27819fed_3_26963	Tityus2_.fasta	71.668,1	1	6	6	6	0.00568	0.155	FVDNIFQDYKATLHPYTR	R	E	0.997	110	25	110	5.7	1	0	0	0	2	2228.11			240555	363	380	Empty	true
Fed	Hemocyanin AA6 chain	04165fasting_1_16742,27819fed_3_26963	Tityus2_.fasta	71.668,1	1	6	6	6	0.00568	0.155	IFLGPKFDELGNVLDVNEQRR	R	L	0.997	0	0	0	6.41	1	0	0	0	2	2459.3			152738	458	478	Empty	true
Fed	Hemocyanin AA6 chain	04165fasting_1_16742,27819fed_3_26963	Tityus2_.fasta	71.668,1	1	6	6	6	0.00568	0.155	ILSLFEHLTSLTEK	R	Q	0.997	115	25	101	4.14	1	0	0	0	2	1630.91			412687	10	23	Empty	true
Fed	Hemocyanin AA6 chain	04165fasting_1_16742,27819fed_3_26963	Tityus2_.fasta	71.668,1	1	6	6	6	0.00568	0.155	NQEFYGSLHNWGHVLMAR	R	I	0.997	45.5	25	45.5	7.06	1	0	0	0	2	2159.02			92.549,0	313	330	Empty	true
Fed	Hemocyanin F chain	10353fasting_2_29561	Tityus2_.fasta	71.568,2	0.998	1	1	1	0.000946	0.0335	VPDVITTTMKEDVLQLSHGIK	K	T	0.997	115	25	111	7.48	1	0	0	0	2	2324.25			163568	400	420	Empty	true
Fed	Soma ferritin	04840fasting_3_18432,22868fed_3_19124	Tityus2_.fasta	19.256,8	1	3	4	30	0.0284	0.131	KIGDHVTNLK	K	R	0.997	58.9	37.7	31	0	1	0	0	0	2	1164.67			2832310	143	152	Empty	true
Fed	Soma ferritin	04840fasting_3_18432,22868fed_3_19124	Tityus2_.fasta	19.256,8	1	3	4	30	0.0284	0.131	KIGDHVTNLKR	K	V	0.997	73.7	37.3	35.5	0	11	0	0	0	2	1320.77			18289700	143	153	Empty	true
Fed	Soma ferritin	04840fasting_3_18432,22868fed_3_19124	Tityus2_.fasta	19.256,8	1	3	4	30	0.0284	0.131	TVNQSLLDLHK	K	V	0.997	55.6	25.9	55.6	1.62	18	0	0	0	2	1267.7			125349000	105	115	Empty	true
Fed	Filamin-A	06594fasting_3_840	Tityus2_.fasta	237.867,5	1	2	2	2	0.00189	0.0178	AEISCNDNKDGTVGVS	K	Y	0.964	0	0	0	0.538	1	0	0	0	1	1665.74			274181	1457	1472	Empty	true
Fed	Filamin-A	06594fasting_3_840	Tityus2_.fasta	237.867,5	1	2	2	2	0.00189	0.0178	IKVDGLEPSVFLDSPTDFIVDAR	K	A	0.997	53.6	25	52.9	4.8	1	0	0	0	2	2533.32			14.703,7	841	863	Empty	true
Fed	MAM and LDL-receptor class A domain-containing protein C10orf112	19500fed_1_12131	Tityus2_.fasta	73.429,4	1	4	4	4	0.00378	0.0469	DGWFAVLSGK	K	K	0.997	56.7	28.6	47.2	1.92	1	0	0	0	2	1079.55			347130	517	526	Empty	true
Fed	MAM and LDL-receptor class A domain-containing protein C10orf112	19500fed_1_12131	Tityus2_.fasta	73.429,4	1	4	4	4	0.00378	0.0469	DGWFAVLSGKK	K	A	0.997	58.2	27.7	57.1	3.07	1	0	0	0	2	1207.65			112862	517	527	Empty	true
Fed	MAM and LDL-receptor class A domain-containing protein C10orf112	19500fed_1_12131	Tityus2_.fasta	73.429,4	1	4	4	4	0.00378	0.0469	FLYFFGER	K	N	0.997	44.6	28.6	37	1.85	1	0	0	0	2	1078.54			521181	297	304	Empty	true
Fed	MAM and LDL-receptor class A domain-containing protein C10orf112	19500fed_1_12131	Tityus2_.fasta	73.429,4	1	4	4	4	0.00378	0.0469	WTLQSGFSQLK	K	K	0.997	69.6	27.6	63.5	1.6	1	0	0	0	2	1294.68			204259	271	281	Empty	true
Fed	Hemocyanin F chain	02750fasting_2_13777,19977fed_1_12930	Tityus2_.fasta	72.730,8	1	2	2	2	0.00189	0.0333	IIPLFEHLTSLTR	R	K	0.997	68.7	25	63.7	0.959	1	0	0	0	2	1539.89			276998	10	22	Empty	true
Fed	Hemocyanin F chain	02750fasting_2_13777,19977fed_1_12930	Tityus2_.fasta	72.730,8	1	2	2	2	0.00189	0.0333	TIADFVTK	R	N	0.985	50.9	28.4	48	0	1	0	0	0	2	8944932			228576	605	612	Empty	true
Fed	Calcium-transporting ATPase sarcoplasmic-endoplasmic reticulum type	02437fasting_3_13258	Tityus2_.fasta	112.053,1	0.601	0	0	0	0	0.00784	EFTLEFSR	K	D	0.997	55.9	26.8	40.8	1.77	1	0	0	0	2	1028.5			398632	482	489	Empty	false	26540fed_2_24694
Fed	Cofilin-actin-depolymerizing factor homolog	07702fasting_1_24238	Tityus2_.fasta	16.976,6	0.981	1	1	1	0.000946	0.142	YVQACDFEEISQEAIEDAFRK	K	G	0.997	31.8	25	31.8	3.47	1	0	0	0	2	2548.17			81.968,8	125	145	Empty	true
Fed	MAM and LDL-receptor class A domain-containing protein C10orf112	23622fed_2_152	Tityus2_.fasta	580.276,3	1	26	26	26	0.0246	0.0708	DGTLDYPLWSIK	K	G	0.997	45.6	27	44.5	1.57	1	0	0	0	2	1407.72			209230	768	779	Empty	true
Fed	MAM and LDL-receptor class A domain-containing protein C10orf112	23622fed_2_152	Tityus2_.fasta	580.276,3	1	26	26	26	0.0246	0.0708	FRFFYTYSIPSFTHLR	K	Y	0.997	26.8	25	26.8	1.51	1	0	0	0	2	2082.06			146582	2979	2994	Empty	true
Fed	MAM and LDL-receptor class A domain-containing protein C10orf112	23622fed_2_152	Tityus2_.fasta	580.276,3	1	26	26	26	0.0246	0.0708	FWYFLQGK	R	H	0.996	16.3	28.8	12.9	1.59	1	0	0	0	2	1088.56			128621	239	246	Empty	true
Fed	MAM and LDL-receptor class A domain-containing protein C10orf112	23622fed_2_152	Tityus2_.fasta	580.276,3	1	26	26	26	0.0246	0.0708	GHYIALDHTSKYHR	R	S	0.997	74	25.6	74	7	1	0	0	0	2	1697.85			101938	2214	2227	Empty	true
Fed	MAM and LDL-receptor class A domain-containing protein C10orf112	23622fed_2_152	Tityus2_.fasta	580.276,3	1	26	26	26	0.0246	0.0708	GIAVDDIVLSK	R	Y	0.997	70.7	27	58	0.658	1	0	0	0	2	1129.65			469477	2133	2143	Empty	true
Fed	MAM and LDL-receptor class A domain-containing protein C10orf112	23622fed_2_152	Tityus2_.fasta	580.276,3	1	26	26	26	0.0246	0.0708	GSIGDYWIR	K	S	0.997	57.9	28.5	57.9	1.77	1	0	0	0	2	1066.53			410181	3866	3874	Empty	true
Fed	MAM and LDL-receptor class A domain-containing protein C10orf112	23622fed_2_152	Tityus2_.fasta	580.276,3	1	26	26	26	0.0246	0.0708	HSDILEVLK	K	L	0.997	80.5	26.3	68.5	3.64	1	0	0	0	2	1053.59			406011	247	255	Empty	true
Fed	MAM and LDL-receptor class A domain-containing protein C10orf112	23622fed_2_152	Tityus2_.fasta	580.276,3	1	26	26	26	0.0246	0.0708	IALISSTTFLPTFAK	R	D	0.997	91.9	25	80.8	3.47	1	0	0	0	2	1609.92			330523	3387	3401	Empty	true
Fed	MAM and LDL-receptor class A domain-containing protein C10orf112	23622fed_2_152	Tityus2_.fasta	580.276,3	1	26	26	26	0.0246	0.0708	KEPFSLSFSR	R	V	0.997	54.2	27.1	31.5	2.37	1	0	0	0	2	1197.63			385297	3673	3682	Empty	true
Fed	MAM and LDL-receptor class A domain-containing protein C10orf112	23622fed_2_152	Tityus2_.fasta	580.276,3	1	26	26	26	0.0246	0.0708	LNFNVLIEGK	K	Q	0.997	92.3	27.2	67	3.64	1	0	0	0	2	1146.65			189627	3456	3465	Empty	true
Fed	MAM and LDL-receptor class A domain-containing protein C10orf112	23622fed_2_152	Tityus2_.fasta	580.276,3	1	26	26	26	0.0246	0.0708	LTVPLSVK	R	L	0.997	58	25	36.3	0.921	1	0	0	0	2	8565503			437618	3448	3455	Empty	true
Fed	MAM and LDL-receptor class A domain-containing protein C10orf112	23622fed_2_152	Tityus2_.fasta	580.276,3	1	26	26	26	0.0246	0.0708	LYIVGEK	K	D	0.988	22.8	27.6	12.1	0.553	1	0	0	0	2	8214768			233343	461	467	Empty	true
Fed	MAM and LDL-receptor class A domain-containing protein C10orf112	23622fed_2_152	Tityus2_.fasta	580.276,3	1	26	26	26	0.0246	0.0708	QDQEGPWDIRWTTSTIFGQYYEK	R	V	0.997	128	25	127	10.5	1	0	0	0	2	2848.32			96.531,5	3010	3032	Empty	true
Fed	MAM and LDL-receptor class A domain-containing protein C10orf112	23622fed_2_152	Tityus2_.fasta	580.276,3	1	26	26	26	0.0246	0.0708	SIFDDGPK	R	S	0.985	53.6	30	39.9	0	1	0	0	0	2	8784256			479978	45	52	Empty	true
Fed	MAM and LDL-receptor class A domain-containing protein C10orf112	23622fed_2_152	Tityus2_.fasta	580.276,3	1	26	26	26	0.0246	0.0708	SLDKYYIVIEAR	K	R	0.997	59.2	25.7	55.1	4.62	1	0	0	0	2	1469.8			369681	1940	1951	Empty	true
Fed	MAM and LDL-receptor class A domain-containing protein C10orf112	23622fed_2_152	Tityus2_.fasta	580.276,3	1	26	26	26	0.0246	0.0708	SPDYISWEWLDGSTSNPQTGPEFDHTFGTK	K	D	0.997	176	25	176	17.6	1	0	0	0	2	3399.51			336285	679	708	Empty	true
Fed	MAM and LDL-receptor class A domain-containing protein C10orf112	23622fed_2_152	Tityus2_.fasta	580.276,3	1	26	26	26	0.0246	0.0708	STGESPFNGEKPETDHTTNTVTGK	R	F	0.997	100	25	100	18.1	1	0	0	0	2	2534.16			1066880	1837	1860	Empty	true
Fed	MAM and LDL-receptor class A domain-containing protein C10orf112	23622fed_2_152	Tityus2_.fasta	580.276,3	1	26	26	26	0.0246	0.0708	TCDFKDDCPTGADER	K	T	0.997	94.6	25	94.6	7.8	1	0	0	0	2	1786.7			367109	3523	3537	Empty	true
Fed	MAM and LDL-receptor class A domain-containing protein C10orf112	23622fed_2_152	Tityus2_.fasta	580.276,3	1	26	26	26	0.0246	0.0708	TDSEIRLENNVPIFSK	R	I	0.997	96.5	25.1	92	6.92	1	0	0	0	2	1861.97			382824	1908	1923	Empty	true
Fed	MAM and LDL-receptor class A domain-containing protein C10orf112	23622fed_2_152	Tityus2_.fasta	580.276,3	1	26	26	26	0.0246	0.0708	TLPSPFSVDASWLR	R	V	0.997	54.6	26.6	52.3	3.21	1	0	0	0	2	1575.82			345392	337	350	Empty	true
Fed	MAM and LDL-receptor class A domain-containing protein C10orf112	23622fed_2_152	Tityus2_.fasta	580.276,3	1	26	26	26	0.0246	0.0708	TTISLWK	K	E	0.988	38.9	29.4	22.4	2.92	1	0	0	0	2	8484877			559348	262	268	Empty	true
Fed	MAM and LDL-receptor class A domain-containing protein C10orf112	23622fed_2_152	Tityus2_.fasta	580.276,3	1	26	26	26	0.0246	0.0708	VSGSESGSLFR	R	L	0.997	29	27.5	22.3	0.602	1	0	0	0	2	1125.55			562237	351	361	Empty	true
Fed	MAM and LDL-receptor class A domain-containing protein C10orf112	23622fed_2_152	Tityus2_.fasta	580.276,3	1	26	26	26	0.0246	0.0708	VSIGNQSNKWYLKFIATHVQSK	R	G	0.997	0	0	0	9.96	1	0	0	0	2	2548.37			229448	3246	3267	Empty	true
Fed	MAM and LDL-receptor class A domain-containing protein C10orf112	23622fed_2_152	Tityus2_.fasta	580.276,3	1	26	26	26	0.0246	0.0708	WTTSTIFGQYYEK	R	V	0.997	86.5	25.8	86.5	6.82	1	0	0	0	2	1623.77			98.223,7	3020	3032	Empty	true
Fed	MAM and LDL-receptor class A domain-containing protein C10orf112	23622fed_2_152	Tityus2_.fasta	580.276,3	1	26	26	26	0.0246	0.0708	YSDYQGQGPLTIYTR	R	Q	0.997	113	25.2	113	8.51	1	0	0	0	2	1761.84			481751	2995	3009	Empty	true
Fed	MAM and LDL-receptor class A domain-containing protein C10orf112	23622fed_2_152	Tityus2_.fasta	580.276,3	1	26	26	26	0.0246	0.0708	YSNSIVPIWSEKGDEGDEWHAAQVSVTPTSSEPFR	K	Y	0.997	95.6	25	95.6	15	1	0	0	0	2	3905.83			333779	2426	2460	Empty	true
Fed	Apical endosomal glycoprotein	13927fasting_1_2788	Tityus2_.fasta	169.557,3	1	11	11	11	0.0104	0.0961	AFSTLWQR	K	N	0.997	44.5	28.9	42.7	1.74	1	0	0	0	2	1008.53			531257	1142	1149	Empty	true
Fed	Apical endosomal glycoprotein	13927fasting_1_2788	Tityus2_.fasta	169.557,3	1	11	11	11	0.0104	0.0961	AVLQFSSVK	K	G	0.997	49.5	27.4	38	0.824	1	0	0	0	2	9785618			333653	589	597	Empty	true
Fed	Apical endosomal glycoprotein	13927fasting_1_2788	Tityus2_.fasta	169.557,3	1	11	11	11	0.0104	0.0961	GIIPLYSEVKEYQVIFEGIVGNGNK	R	G	0.997	78.9	25	78.9	5.89	1	0	0	0	2	2766.47			298645	470	494	Empty	true
Fed	Apical endosomal glycoprotein	13927fasting_1_2788	Tityus2_.fasta	169.557,3	1	11	11	11	0.0104	0.0961	GTSNEFELAIDDLK	K	L	0.997	99.4	26.8	99.4	6.25	1	0	0	0	2	1551.75			111183	829	842	Empty	true
Fed	Apical endosomal glycoprotein	13927fasting_1_2788	Tityus2_.fasta	169.557,3	1	11	11	11	0.0104	0.0961	LDHTTGTDYGYYLQAK	K	S	0.997	53.6	25	53.6	4.43	1	0	0	0	2	1845.87			716663	725	740	Empty	true
Fed	Apical endosomal glycoprotein	13927fasting_1_2788	Tityus2_.fasta	169.557,3	1	11	11	11	0.0104	0.0961	LESDTFPSLK	R	N	0.997	61.5	28.5	39.4	0.481	1	0	0	0	2	1136.58			253149	413	422	Empty	true
Fed	Apical endosomal glycoprotein	13927fasting_1_2788	Tityus2_.fasta	169.557,3	1	11	11	11	0.0104	0.0961	MNMLDDNFEWIR	Y	H	0.997	84.5	35.3	76.2	3.2	1	0	0	0	1	1583.7			116730	1400	1411	Empty	true
Fed	Apical endosomal glycoprotein	13927fasting_1_2788	Tityus2_.fasta	169.557,3	1	11	11	11	0.0104	0.0961	SDHSVGTNKGWYWILIIK	K	N	0.997	27.9	25	27.9	1.38	1	0	0	0	2	2117.12			64.537,9	224	241	Empty	true
Fed	Apical endosomal glycoprotein	13927fasting_1_2788	Tityus2_.fasta	169.557,3	1	11	11	11	0.0104	0.0961	SDHSVGTNKGWYWILIIKNKPK	K	N	0.994	0	0	0	19.6	1	0	0	0	2	2584.4			170057	224	245	Empty	true
Fed	Apical endosomal glycoprotein	13927fasting_1_2788	Tityus2_.fasta	169.557,3	1	11	11	11	0.0104	0.0961	VQGSTATPFTGPSEDHTK	R	K	0.997	36.7	25	36.7	3.08	1	0	0	0	2	1859.88			736481	47	64	Empty	true
Fed	Apical endosomal glycoprotein	13927fasting_1_2788	Tityus2_.fasta	169.557,3	1	11	11	11	0.0104	0.0961	VQNFELVK	R	I	0.997	65.2	28.6	51.7	1.09	1	0	0	0	2	9765462			581970	881	888	Empty	true
Fed	L-like cysteine peptidase 1	33787Fed_cathepsin	Tityus2_.fasta	21.742,8	1	3	3	3	0.00284	0.197	LVSLSEQNLVDCSQK	K	Q	0.997	114	25.6	0	8.64	1	0	0	0	2	1719.86			574098	25	39	Empty	true
Fed	L-like cysteine peptidase 1	33787Fed_cathepsin	Tityus2_.fasta	21.742,8	1	3	3	3	0.00284	0.197	NSWGTSWGIK	K	G	0.997	52.7	28.6	51.9	0	1	0	0	0	2	1135.55			313313	165	174	Empty	true
Fed	L-like cysteine peptidase 1	33787Fed_cathepsin	Tityus2_.fasta	21.742,8	1	3	3	3	0.00284	0.197	QSVGATCTGYVDVK	R	S	0.997	124	25.8	109	9.2	1	0	0	0	2	1484.71			936246	83	96	Empty	true
Fed	unknown protein	28337fed_3_28112,28338fed_3_28114	Tityus2_.fasta	5.796,5	1	5	9	13	0.0123	0.725	CKNPAESFIVELDK	K	C	0.997	62.3	26.5	61.4	4.59	3	0	0	0	2	1649.82			1111030	17	30	Empty	true
Fed	unknown protein	28337fed_3_28112,28338fed_3_28114	Tityus2_.fasta	5.796,5	1	5	9	13	0.0123	0.725	CKNPAESFIVELDKCAIPCEPK	K	F	0.997	160	37.5	17.6	19.9	6	0	0	0	2	2588.22			2015980	17	38	Empty	true
Fed	unknown protein	28337fed_3_28112,28338fed_3_28114	Tityus2_.fasta	5.796,5	1	5	9	13	0.0123	0.725	GGESCEKVENNDVCK	M	C	0.997	71.4	32.8	0	0	2	0	0	0	1	1738.74			132974	2	16	Empty	true
Fed	unknown protein	28337fed_3_28112,28338fed_3_28114	Tityus2_.fasta	5.796,5	1	5	9	13	0.0123	0.725	NPAESFIVELDK	K	C	0.997	75.3	37.9	5.74	0	1	0	0	0	2	1303.69			144530	19	30	Empty	true
Fed	unknown protein	28337fed_3_28112,28338fed_3_28114	Tityus2_.fasta	5.796,5	1	5	9	13	0.0123	0.725	NPAESFIVELDKCAIPCEPK	K	F	0.997	149	25	149	14.5	1	0	0	0	2	2317.12			254641	19	38	Empty	true
Fed	Calcium-transporting ATPase sarcoplasmic-endoplasmic reticulum type	26540fed_2_24694	Tityus2_.fasta	109.900,1	1	2	2	3	0.00284	0.023	EFTLEFSR	K	D	0.997	55.9	26.8	40.8	1.77	1	0	0	0	2	1028.5			398632	483	490	Empty	true	02437fasting_3_13258
Fed	Calcium-transporting ATPase sarcoplasmic-endoplasmic reticulum type	26540fed_2_24694	Tityus2_.fasta	109.900,1	1	2	2	3	0.00284	0.023	VGEATETALIVLAEK	K	M	0.997	112	25	106	5.09	2	0	0	0	2	1543.86			286403	438	452	Empty	true
Fed	Hemocyanin B chain	10939fasting_3_31133	Tityus2_.fasta	73.668,1	1	1	1	1	0.000946	0.0142	FVPIETLLK	K	A	0.997	33.2	25	30	1.34	1	0	0	0	2	1059.64			238698	122	130	Empty	true
Fed	23666fed_2_19-DECOY Calreticulin	23666fed_2_19-DECOY		0,0	0.999	1	1	1	0.000946	0	TSGWTEEGVK	K	Q	0.984	0	0	0	3.77	1	0	0	0	2	1093.52			320910	0	0	Empty	true
Fed	Rab GDP dissociation inhibitor alpha	23774fed_3_267	Tityus2_.fasta	50.214,1	1	2	2	2	0.00189	0.0632	GTGEDFDFSK	R	V	0.997	46.1	25	46.1	1.62	1	0	0	0	2	1102.47			166073	424	433	Empty	true
Fed	Rab GDP dissociation inhibitor alpha	23774fed_3_267	Tityus2_.fasta	50.214,1	1	2	2	2	0.00189	0.0632	YYGGESASITPLEELFAK	K	F	0.997	56	25.1	56	5.6	1	0	0	0	2	1974.97			25.765,5	38	55	Empty	true
Fed	unknown protein	00238fasting_3_10821	Tityus2_.fasta	41.925,0	0.998	1	1	1	0.000946	0.0504	SLIGIPEDAKPFYDLESR	K	I	0.997	66.3	25	63.9	3.66	1	0	0	0	2	2050.05			241094	96	113	Empty	true
Fed	Speckle targeted PIP5K1A-regulated poly A polymerase	30528fed_3_3241	Tityus2_.fasta	88.361,4	0.994	1	1	1	0.000866	0.013	NVFDRTQVSR	K	K	0.986	35.9	27.5	20.5	0	1	0	0	0	2	1221.63			3627760	564	573	Empty	true
Fed	Zinc finger CCCH-type with G patch domain-containing protein	02385fasting_2_13173	Tityus2_.fasta	59.777,7	0.904	1	1	1	0.000866	0.0135	KDLLTLK	R	S	0.988	69.9	29.5	20	1.4	1	0	0	0	2	8305348			1193850	44	50	Empty	true
Fed	Hemocyanin F chain	10353fasting_2_29561	Tityus2_.fasta	71.568,2	1	2	2	2	0.00173	0.0559	ILPLFEHLTSLTAK	R	Q	0.997	77	25	71.8	3.74	1	0	0	0	2	1582.92			156839	10	23	Empty	true
Fed	Hemocyanin F chain	10353fasting_2_29561	Tityus2_.fasta	71.568,2	1	2	2	2	0.00173	0.0559	VPDVITTTMKEDVLQLSHGIK	K	T	0.997	108	25	106	5.64	1	0	0	0	2	2324.25			129173	400	420	Empty	true
Fed	Focal adhesion kinase 1	26084fed_1_23351	Tityus2_.fasta	119.288,9	0.998	1	1	1	0.000866	0.0125	NDSPITKYSSIPR	R	K	0.997	25.9	25.9	25.9	1.89	1	0	0	0	2	1477.76			1928450	327	339	Empty	true
Fed	Pyruvate kinase muscle isozyme	18349fed_1_10849	Tityus2_.fasta	59.252,5	0.977	1	1	1	0.000866	0.0312	GDLGIEIPPEKVFLAQK	R	M	0.997	36.9	25	36.9	2.44	1	0	0	0	2	1854.04			211238	289	305	Empty	true
Fed	Myelin expression factor 2	27015fed_2_25323	Tityus2_.fasta	47.590,9	0.89	1	1	1	0.000866	0.0224	VISIELKTDK	K	E	0.986	37.7	25.5	25.7	0	1	0	0	0	2	1145.68			1097400	236	245	Empty	true
Fed	cathepsin L-like cysteine peptidase 4	33783Fed_15067	Tityus2_.fasta	37.615,7	0.999	1	1	1	0.000866	0.0697	LPDTVDWR	I	E	0.997	44.2	37	32.6	3.31	1	0	0	0	1	1001.51			252450	116	123	Empty	false	33786Fed_5610,33793Fasting_6385
Fed	cathepsin L-like cysteine peptidase 4	33783Fed_15067	Tityus2_.fasta	37.615,7	0.999	1	1	1	0.000866	0.0697	LVSLSEQNLVDCSKK	K	D	0.997	110	25.6	0	8.06	1	0	0	0	2	1719.89			284799	160	174	Empty	true
Fed	CLIP-associating protein 1	21163fed_3_15208	Tityus2_.fasta	83.872,0	0.977	1	1	1	0.000866	0.0147	QLEIPFQLSVK	R	D	0.997	21.6	25	4.26	2.18	1	0	0	0	2	1301.75			421755	361	371	Empty	true
Fed	unknown protein	06268fasting_2_579,23287fed_3_20624	Tityus2_.fasta	33.500,7	1	3	3	3	0.0026	0.0882	IDMENVVLSMQEVK	K	V	0.997	54.5	26.4	54.5	5.1	1	0	0	0	2	1634.81			123056	231	244	Empty	true
Fed	unknown protein	06268fasting_2_579,23287fed_3_20624	Tityus2_.fasta	33.500,7	1	3	3	3	0.0026	0.0882	IDMENVVLSMQEVKVEAFK	K	Q	0.997	175	25	175	9.82	1	0	0	0	2	2209.12			282062	231	249	Empty	true
Fed	unknown protein	06268fasting_2_579,23287fed_3_20624	Tityus2_.fasta	33.500,7	1	3	3	3	0.0026	0.0882	LDAAIQFK	K	I	0.997	67.4	29.4	59.8	1.28	1	0	0	0	2	9055092			889439	118	125	Empty	true
Fed	Hemocyanin II	10999fasting_2_31207	Tityus2_.fasta	72.662,2	1	2	2	2	0.00173	0.057	FVPAATMAEILSK	R	A	0.997	95	27.4	79.8	4.17	1	0	0	0	2	1377.74			89.289,1	121	133	Empty	true
Fed	Hemocyanin II	10999fasting_2_31207	Tityus2_.fasta	72.662,2	1	2	2	2	0.00173	0.057	HLYEVFYEAKDFDDFVHLAQEAR	R	T	0.997	62.3	25	62.3	8.77	1	0	0	0	2	2842.35			57.733,0	61	83	Empty	true
Fed	Phosphoribosylformylglycinamidine synthase	00735fasting_3_11189,24419fed_1_79	Tityus2_.fasta	145.611,0	1	8	8	8	0.00693	0.106	ESHRPSSFITHSGVR	K	H	0.997	65.6	25.7	64.2	3.62	1	0	0	0	2	1696.85			332715	293	307	Empty	true
Fed	Phosphoribosylformylglycinamidine synthase	00735fasting_3_11189,24419fed_1_79	Tityus2_.fasta	145.611,0	1	8	8	8	0.00693	0.106	EWVKPIMFSGGIGSIDAAFIK	R	K	0.997	67.2	25	67.2	2.19	1	0	0	0	2	2266.19			26.446,1	424	444	Empty	true
Fed	Phosphoribosylformylglycinamidine synthase	00735fasting_3_11189,24419fed_1_79	Tityus2_.fasta	145.611,0	1	8	8	8	0.00693	0.106	FGEPVILGFAR	K	S	0.997	71.3	27.7	69.8	6.09	1	0	0	0	2	1205.67			387127	401	411	Empty	true
Fed	Phosphoribosylformylglycinamidine synthase	00735fasting_3_11189,24419fed_1_79	Tityus2_.fasta	145.611,0	1	8	8	8	0.00693	0.106	HLAMMPHPER	R	C	0.997	55.6	26.9	46.2	5.43	1	0	0	0	2	1218.59			127409	1273	1282	Empty	true
Fed	Phosphoribosylformylglycinamidine synthase	00735fasting_3_11189,24419fed_1_79	Tityus2_.fasta	145.611,0	1	8	8	8	0.00693	0.106	IGVGGGSASSVHVQGDQK	R	A	0.997	152	26.3	149	6.41	1	0	0	0	2	1682.85			345079	464	481	Empty	true
Fed	Phosphoribosylformylglycinamidine synthase	00735fasting_3_11189,24419fed_1_79	Tityus2_.fasta	145.611,0	1	8	8	8	0.00693	0.106	LGGSALAQCFNQLGDNTADLDSPELLR	R	T	0.997	39	25	38.5	3.21	1	0	0	0	2	2875.39			12.814,9	854	880	Empty	true
Fed	Phosphoribosylformylglycinamidine synthase	00735fasting_3_11189,24419fed_1_79	Tityus2_.fasta	145.611,0	1	8	8	8	0.00693	0.106	MSVAEAVTNLMFAPISSLKDAK	R	C	0.997	144	25	144	10.2	1	0	0	0	2	2323.2			127328	733	754	Empty	true
Fed	Phosphoribosylformylglycinamidine synthase	00735fasting_3_11189,24419fed_1_79	Tityus2_.fasta	145.611,0	1	8	8	8	0.00693	0.106	NLTNDQLNSLSWILSR	K	G	0.997	75.2	25.4	75.2	4.96	1	0	0	0	2	1873.98			60.547,2	52	67	Empty	true
Fed	Ras GTPase-activating protein 3	17523fed_1_10020	Tityus2_.fasta	95.851,0	1	1	1	1	0.000866	0.00839	KIVSFLK	R	A	0.988	45	25	0	4.96	1	0	0	0	2	8345448			892610	347	353	Empty	true
Fed	Dipeptidyl peptidase 4	00565fasting_2_11024	Tityus2_.fasta	68.973,7	0.831	1	1	1	0.000866	0.0183	KNYIYAWIDGR	R	G	0.977	0	0	0	1.82	1	0	0	0	2	1398.72			1830350	389	399	Empty	true
Fed	Fumarylacetoacetase	15148fasting_3_4542	Tityus2_.fasta	50.929,5	0.977	1	1	1	0.000866	0.0417	ASSVVVSGTPIHRPHGQTR	R	A	0.997	33.5	25	33.5	3.16	1	0	0	0	2	1986.06			135290	163	181	Empty	true
Fed	Tumor necrosis factor alpha-induced protein 8-like protein	16039fasting_1_5834	Tityus2_.fasta	21.541,8	0.999	1	1	2	0.00173	0.0479	SLLKDLVVR	R	H	0.997	59.5	25.7	43.9	0	2	0	0	0	2	1042.66			1285430	127	135	Empty	true
Fed	MAM and LDL-receptor class A domain-containing protein C10orf112	19500fed_1_12131	Tityus2_.fasta	73.429,4	1	5	5	5	0.00433	0.0626	DGWFAVLSGK	K	K	0.997	59.5	28.6	48.6	2.04	1	0	0	0	2	1079.55			161211	517	526	Empty	true
Fed	MAM and LDL-receptor class A domain-containing protein C10orf112	19500fed_1_12131	Tityus2_.fasta	73.429,4	1	5	5	5	0.00433	0.0626	DGWFAVLSGKK	K	A	0.997	60.7	27.7	59.1	4.82	1	0	0	0	2	1207.65			147615	517	527	Empty	true
Fed	MAM and LDL-receptor class A domain-containing protein C10orf112	19500fed_1_12131	Tityus2_.fasta	73.429,4	1	5	5	5	0.00433	0.0626	FLYFFGER	K	N	0.997	44.9	28.6	37.7	2.31	1	0	0	0	2	1078.54			424773	297	304	Empty	true
Fed	MAM and LDL-receptor class A domain-containing protein C10orf112	19500fed_1_12131	Tityus2_.fasta	73.429,4	1	5	5	5	0.00433	0.0626	TTAPSYDSLK	K	K	0.997	62.1	28.1	53.7	2.64	1	0	0	0	2	1082.54			333423	505	514	Empty	true
Fed	MAM and LDL-receptor class A domain-containing protein C10orf112	19500fed_1_12131	Tityus2_.fasta	73.429,4	1	5	5	5	0.00433	0.0626	WTLQSGFSQLK	K	K	0.997	69.6	27.6	64.8	2.72	1	0	0	0	2	1294.68			176708	271	281	Empty	true
Fed	unknown protein	05978fasting_2_363	Tityus2_.fasta	75.890,9	0.977	1	1	1	0.000866	0.0293	SLVLDITKLEDIPELYLTAK	K	S	0.997	125	25	125	10.8	1	0	0	0	2	2274.28			204920	513	532	Empty	true
Fed	Apical endosomal glycoprotein	13927fasting_1_2788	Tityus2_.fasta	169.557,3	1	5	5	5	0.00433	0.0555	GIIPLYSEVKEYQVIFEGIVGNGNK	R	G	0.997	94.7	25	94.7	12.3	1	0	0	0	2	2766.47			271509	470	494	Empty	true
Fed	Apical endosomal glycoprotein	13927fasting_1_2788	Tityus2_.fasta	169.557,3	1	5	5	5	0.00433	0.0555	VQGSTATPFTGPSEDHTK	R	K	0.997	17	25	17	1.54	1	0	0	0	2	1859.88			1199920	47	64	Empty	true
Fed	Apical endosomal glycoprotein	13927fasting_1_2788	Tityus2_.fasta	169.557,3	1	5	5	5	0.00433	0.0555	VQNFELVK	R	I	0.997	62	28.6	48.8	1.55	1	0	0	0	2	9765462			461180	881	888	Empty	true
Fed	Apical endosomal glycoprotein	13927fasting_1_2788	Tityus2_.fasta	169.557,3	1	5	5	5	0.00433	0.0555	YEICDFETDLCGWTPK	K	E	0.997	108	25	108	7.55	1	0	0	0	2	2033.86			59.685,0	689	704	Empty	true
Fed	Apical endosomal glycoprotein	13927fasting_1_2788	Tityus2_.fasta	169.557,3	1	5	5	5	0.00433	0.0555	YIFALGNENTVGEAR	R	L	0.997	57.2	26.4	57.2	4.59	1	0	0	0	2	1653.82			470735	1086	1100	Empty	true
Fed	Calcium-transporting ATPase sarcoplasmic-endoplasmic reticulum type	26540fed_2_24694	Tityus2_.fasta	109.900,1	1	2	2	2	0.00173	0.023	EFTLEFSR	K	D	0.997	51.2	27	37.9	1.96	1	0	0	0	2	1028.5			165316	483	490	Empty	true	02437fasting_3_13258
Fed	Calcium-transporting ATPase sarcoplasmic-endoplasmic reticulum type	26540fed_2_24694	Tityus2_.fasta	109.900,1	1	2	2	2	0.00173	0.023	VGEATETALIVLAEK	K	M	0.997	112	25	106	8.7	1	0	0	0	2	1543.86			205519	438	452	Empty	true
Fed	Filamin-A	06594fasting_3_840	Tityus2_.fasta	237.867,5	1	1	1	1	0.000866	0.0105	IKVDGLEPSVFLDSPTDFIVDAR	K	A	0.997	98.7	25	95.1	7.89	1	0	0	0	2	2533.32			85.315,6	841	863	Empty	true
Fed	L-like cysteine peptidase 1	33787Fed_cathepsin	Tityus2_.fasta	21.742,8	1	2	2	2	0.00173	0.146	LVSLSEQNLVDCSQK	K	Q	0.997	110	25.6	0	8.06	1	0	0	0	2	1719.86			284799	25	39	Empty	true
Fed	L-like cysteine peptidase 1	33787Fed_cathepsin	Tityus2_.fasta	21.742,8	1	2	2	2	0.00173	0.146	QSVGATCTGYVDVK	R	S	0.997	131	25.6	115	9.33	1	0	0	0	2	1484.71			783863	83	96	Empty	true
Fed	Hemocyanin F chain	02750fasting_2_13777,19977fed_1_12930	Tityus2_.fasta	72.730,8	1	3	3	3	0.0026	0.0571	FIPAETINAALK	R	A	0.997	49.4	26.2	39.8	2.47	1	0	0	0	2	1287.73			373414	119	130	Empty	true
Fed	Hemocyanin F chain	02750fasting_2_13777,19977fed_1_12930	Tityus2_.fasta	72.730,8	1	3	3	3	0.0026	0.0571	IIPLFEHLTSLTR	R	K	0.997	68.7	25	63.7	1.38	1	0	0	0	2	1539.89			247186	10	22	Empty	true
Fed	Hemocyanin F chain	02750fasting_2_13777,19977fed_1_12930	Tityus2_.fasta	72.730,8	1	3	3	3	0.0026	0.0571	TGPDSIYVEIK	R	E	0.997	93.7	28	86.3	4.89	1	0	0	0	2	1221.64			372002	136	146	Empty	true
Fed	Probable small nuclear ribonucleoprotein Sm D1	18012fed_3_10505	Tityus2_.fasta	13.087,8	0.977	1	1	1	0.000866	0.171	YYILPDSLPLETLLIDDTPK	R	A	0.997	43.4	25	43.4	1.68	1	0	0	0	2	2319.24			40.767,2	67	86	Empty	true
Fed	WD repeat domain phosphoinositide-interacting protein 2	24478fed_1_835	Tityus2_.fasta	49.764,6	0.998	1	1	1	0.000866	0.0283	VLHTIRDTPPNPR	K	G	0.997	61.4	25.1	58.5	2.03	1	0	0	0	2	1515.84			119845	128	140	Empty	true
Fed	Hemocyanin AA6 chain	04165fasting_1_16742,27819fed_3_26963	Tityus2_.fasta	71.668,1	1	5	5	5	0.00433	0.179	IFLGPKFDELGNVLDVNEQRR	R	L	0.997	0	0	0	8.96	1	0	0	0	2	2459.3			269185	458	478	Empty	true
Fed	Hemocyanin AA6 chain	04165fasting_1_16742,27819fed_3_26963	Tityus2_.fasta	71.668,1	1	5	5	5	0.00433	0.179	ILDAIHLGHIHTSEDEEIALDEAHGADILGDIIESSAESR	R	N	0.997	79.4	25	79.4	8.7	1	0	0	0	2	4292.1			160961	273	312	Empty	true
Fed	Hemocyanin AA6 chain	04165fasting_1_16742,27819fed_3_26963	Tityus2_.fasta	71.668,1	1	5	5	5	0.00433	0.179	ILSLFEHLTSLTEK	R	Q	0.997	98.4	25	83.4	3.26	1	0	0	0	2	1630.91			237737	10	23	Empty	true
Fed	Hemocyanin AA6 chain	04165fasting_1_16742,27819fed_3_26963	Tityus2_.fasta	71.668,1	1	5	5	5	0.00433	0.179	LSHGIRFASEHSVKVK	E	Y	0.959	0	0	0	1.37	1	0	0	0	1	1795			281915	414	429	Empty	true
Fed	Hemocyanin AA6 chain	04165fasting_1_16742,27819fed_3_26963	Tityus2_.fasta	71.668,1	1	5	5	5	0.00433	0.179	NLQEFLTPNIHVTDIDIKFDG	R	-	0.997	66.1	25	66.1	7.05	1	0	0	0	2	2429.24			111804	605	625	Empty	true
Fed	unknown protein	28337fed_3_28112,28338fed_3_28114	Tityus2_.fasta	5.796,5	1	5	8	10	0.00866	0.725	CKNPAESFIVELDK	K	C	0.997	64.4	26.5	64.4	8.05	2	0	0	0	2	1649.82			766022	17	30	Empty	true
Fed	unknown protein	28337fed_3_28112,28338fed_3_28114	Tityus2_.fasta	5.796,5	1	5	8	10	0.00866	0.725	CKNPAESFIVELDKCAIPCEPK	K	F	0.997	162	37.3	6.07	12.8	4	0	0	0	2	2588.22			689396	17	38	Empty	true
Fed	unknown protein	28337fed_3_28112,28338fed_3_28114	Tityus2_.fasta	5.796,5	1	5	8	10	0.00866	0.725	DKCAIPCEPK	L	F	0.996	15.8	34.2	0.9	1.43	1	0	0	0	1	1217.57			625322	29	38	Empty	true
Fed	unknown protein	28337fed_3_28112,28338fed_3_28114	Tityus2_.fasta	5.796,5	1	5	8	10	0.00866	0.725	GGESCEKVENNDVCK	M	C	0.997	65.3	32.8	0	0	2	0	0	0	1	1738.74			355053	2	16	Empty	true
Fed	unknown protein	28337fed_3_28112,28338fed_3_28114	Tityus2_.fasta	5.796,5	1	5	8	10	0.00866	0.725	NPAESFIVELDKCAIPCEPK	K	F	0.997	149	25	149	14.3	1	0	0	0	2	2317.12			298147	19	38	Empty	true
Fed	MAM and LDL-receptor class A domain-containing protein C10orf112	23622fed_2_152	Tityus2_.fasta	580.276,3	1	28	28	29	0.0251	0.0749	DGTLDYPLWSIK	K	G	0.997	44.9	27.1	44.1	1.92	1	0	0	0	2	1407.72			157623	768	779	Empty	true
Fed	MAM and LDL-receptor class A domain-containing protein C10orf112	23622fed_2_152	Tityus2_.fasta	580.276,3	1	28	28	29	0.0251	0.0749	DTNDNIFTWTITK	R	A	0.997	99.9	26.4	99.9	5.41	1	0	0	0	2	1568.76			68.554,9	4004	4016	Empty	true
Fed	MAM and LDL-receptor class A domain-containing protein C10orf112	23622fed_2_152	Tityus2_.fasta	580.276,3	1	28	28	29	0.0251	0.0749	FRFFYTYSIPSFTHLR	K	Y	0.997	29.2	25	29.2	3.74	1	0	0	0	2	2082.06			253004	2979	2994	Empty	true
Fed	MAM and LDL-receptor class A domain-containing protein C10orf112	23622fed_2_152	Tityus2_.fasta	580.276,3	1	28	28	29	0.0251	0.0749	GHYIALDHTSKYHR	R	S	0.997	79.7	25.6	79.7	6.55	1	0	0	0	2	1697.85			93.263,5	2214	2227	Empty	true
Fed	MAM and LDL-receptor class A domain-containing protein C10orf112	23622fed_2_152	Tityus2_.fasta	580.276,3	1	28	28	29	0.0251	0.0749	GIAVDDIVLSK	R	Y	0.997	70.7	27	58	0	1	0	0	0	2	1129.65			1056960	2133	2143	Empty	true
Fed	MAM and LDL-receptor class A domain-containing protein C10orf112	23622fed_2_152	Tityus2_.fasta	580.276,3	1	28	28	29	0.0251	0.0749	GSIGDYWIR	K	S	0.997	71.3	28.5	66.8	2.59	1	0	0	0	2	1066.53			351638	3866	3874	Empty	true
Fed	MAM and LDL-receptor class A domain-containing protein C10orf112	23622fed_2_152	Tityus2_.fasta	580.276,3	1	28	28	29	0.0251	0.0749	HSDILEVLK	K	L	0.997	85.6	26.3	73.1	4.59	1	0	0	0	2	1053.59			267922	247	255	Empty	true
Fed	MAM and LDL-receptor class A domain-containing protein C10orf112	23622fed_2_152	Tityus2_.fasta	580.276,3	1	28	28	29	0.0251	0.0749	IALISSTTFLPTFAK	R	D	0.997	92.1	25	78.8	3.68	1	0	0	0	2	1609.92			123698	3387	3401	Empty	true
Fed	MAM and LDL-receptor class A domain-containing protein C10orf112	23622fed_2_152	Tityus2_.fasta	580.276,3	1	28	28	29	0.0251	0.0749	KEPFSLSFSR	R	V	0.997	54.1	27.1	38.9	2.38	1	0	0	0	2	1197.63			297183	3673	3682	Empty	true
Fed	MAM and LDL-receptor class A domain-containing protein C10orf112	23622fed_2_152	Tityus2_.fasta	580.276,3	1	28	28	29	0.0251	0.0749	LLSPFLTSK	R	N	0.997	58.2	25.7	42.9	0	1	0	0	0	2	1005.6			499966	2554	2562	Empty	true
Fed	MAM and LDL-receptor class A domain-containing protein C10orf112	23622fed_2_152	Tityus2_.fasta	580.276,3	1	28	28	29	0.0251	0.0749	LNFNVLIEGK	K	Q	0.997	92.2	27.2	67.5	3.4	1	0	0	0	2	1146.65			205453	3456	3465	Empty	true
Fed	MAM and LDL-receptor class A domain-containing protein C10orf112	23622fed_2_152	Tityus2_.fasta	580.276,3	1	28	28	29	0.0251	0.0749	LNIDNGYQILLIGTTK	K	G	0.997	125	25	125	6.72	1	0	0	0	2	1775.99			78.419,1	978	993	Empty	true
Fed	MAM and LDL-receptor class A domain-containing protein C10orf112	23622fed_2_152	Tityus2_.fasta	580.276,3	1	28	28	29	0.0251	0.0749	LTVPLSVK	R	L	0.979	55.4	25	39.5	0	1	0	0	0	2	8565503			358719	3448	3455	Empty	true
Fed	MAM and LDL-receptor class A domain-containing protein C10orf112	23622fed_2_152	Tityus2_.fasta	580.276,3	1	28	28	29	0.0251	0.0749	LVTDMPLAYK	K	L	0.997	65.8	27.5	49.9	3.7	1	0	0	0	2	1150.62			895357	451	460	Empty	true
Fed	MAM and LDL-receptor class A domain-containing protein C10orf112	23622fed_2_152	Tityus2_.fasta	580.276,3	1	28	28	29	0.0251	0.0749	LYIVGEK	K	D	0.988	22.3	27.6	14.9	1.52	1	0	0	0	2	8214768			219029	461	467	Empty	true
Fed	MAM and LDL-receptor class A domain-containing protein C10orf112	23622fed_2_152	Tityus2_.fasta	580.276,3	1	28	28	29	0.0251	0.0749	NQACFSYWFYR	K	T	0.997	58.8	25	57.9	2.14	1	0	0	0	2	1541.66			104675	2563	2573	Empty	true
Fed	MAM and LDL-receptor class A domain-containing protein C10orf112	23622fed_2_152	Tityus2_.fasta	580.276,3	1	28	28	29	0.0251	0.0749	NSYYKWEIK	K	T	0.997	56.8	27.3	47.2	5.59	1	0	0	0	2	1230.62			208801	2184	2192	Empty	true
Fed	MAM and LDL-receptor class A domain-containing protein C10orf112	23622fed_2_152	Tityus2_.fasta	580.276,3	1	28	28	29	0.0251	0.0749	QDQEGPWDIRWTTSTIFGQYYEK	R	V	0.997	154	25	154	13.3	1	0	0	0	2	2848.32			112173	3010	3032	Empty	true
Fed	MAM and LDL-receptor class A domain-containing protein C10orf112	23622fed_2_152	Tityus2_.fasta	580.276,3	1	28	28	29	0.0251	0.0749	SIFDDGPK	R	S	0.979	46.9	30.1	34.7	0	2	0	0	0	2	8784256			844079	45	52	Empty	true
Fed	MAM and LDL-receptor class A domain-containing protein C10orf112	23622fed_2_152	Tityus2_.fasta	580.276,3	1	28	28	29	0.0251	0.0749	SLDKYYIVIEAR	K	R	0.997	55.4	25.6	51.2	6.33	1	0	0	0	2	1469.8			163070	1940	1951	Empty	true
Fed	MAM and LDL-receptor class A domain-containing protein C10orf112	23622fed_2_152	Tityus2_.fasta	580.276,3	1	28	28	29	0.0251	0.0749	SPDYISWEWLDGSTSNPQTGPEFDHTFGTK	K	D	0.997	187	25	187	16.4	1	0	0	0	2	3399.51			229953	679	708	Empty	true
Fed	MAM and LDL-receptor class A domain-containing protein C10orf112	23622fed_2_152	Tityus2_.fasta	580.276,3	1	28	28	29	0.0251	0.0749	STGESPFNGEKPETDHTTNTVTGK	R	F	0.997	87.3	25	87.3	10.8	1	0	0	0	2	2534.16			1160030	1837	1860	Empty	true
Fed	MAM and LDL-receptor class A domain-containing protein C10orf112	23622fed_2_152	Tityus2_.fasta	580.276,3	1	28	28	29	0.0251	0.0749	TDSEIRLENNVPIFSK	R	I	0.997	80	25	75.6	5.23	1	0	0	0	2	1861.97			400824	1908	1923	Empty	true
Fed	MAM and LDL-receptor class A domain-containing protein C10orf112	23622fed_2_152	Tityus2_.fasta	580.276,3	1	28	28	29	0.0251	0.0749	TLPSPFSVDASWLR	R	V	0.997	87.2	26.6	84.5	3.59	1	0	0	0	2	1575.82			287881	337	350	Empty	true
Fed	MAM and LDL-receptor class A domain-containing protein C10orf112	23622fed_2_152	Tityus2_.fasta	580.276,3	1	28	28	29	0.0251	0.0749	TTISLWK	K	E	0.988	36.5	29.4	16	1.41	1	0	0	0	2	8484877			601587	262	268	Empty	true
Fed	MAM and LDL-receptor class A domain-containing protein C10orf112	23622fed_2_152	Tityus2_.fasta	580.276,3	1	28	28	29	0.0251	0.0749	YIFQAVMGK	R	S	0.997	54	28	46.4	2.59	1	0	0	0	2	1056.55			542012	2461	2469	Empty	true
Fed	MAM and LDL-receptor class A domain-containing protein C10orf112	23622fed_2_152	Tityus2_.fasta	580.276,3	1	28	28	29	0.0251	0.0749	YSDYQGQGPLTIYTR	R	Q	0.997	113	25.1	113	14.7	1	0	0	0	2	1761.84			389762	2995	3009	Empty	true
Fed	MAM and LDL-receptor class A domain-containing protein C10orf112	23622fed_2_152	Tityus2_.fasta	580.276,3	1	28	28	29	0.0251	0.0749	YSNSIVPIWSEKGDEGDEWHAAQVSVTPTSSEPFR	K	Y	0.997	101	25	101	12.9	1	0	0	0	2	3905.83			412980	2426	2460	Empty	true
Fed	Hemocyanin AA6 chain	10337fasting_2_29538,29086fed_2_1376	Tityus2_.fasta	71.794,0	1	4	4	4	0.00346	0.0989	EKLPVSERDDRLK	R	G	0.997	0	0	0	2.12	1	0	0	0	2	1584.87			294100	23	35	Empty	true
Fed	Hemocyanin AA6 chain	10337fasting_2_29538,29086fed_2_1376	Tityus2_.fasta	71.794,0	1	4	4	4	0.00346	0.0989	IPLDVEHGTDILGDIIESSDESK	K	N	0.956	55	37.5	0	0	1	0	0	0	2	2481.24			95.154,6	291	313	Empty	true
Fed	Hemocyanin AA6 chain	10337fasting_2_29538,29086fed_2_1376	Tityus2_.fasta	71.794,0	1	4	4	4	0.00346	0.0989	LFIELDKFYATLAAGK	R	T	0.997	124	25	112	7.46	1	0	0	0	2	1799.99			102901	480	495	Empty	true
Fed	Hemocyanin AA6 chain	10337fasting_2_29538,29086fed_2_1376	Tityus2_.fasta	71.794,0	1	4	4	4	0.00346	0.0989	TPNVVTTLTK	K	E	0.997	39.4	27.8	33.8	4.15	1	0	0	0	2	1073.62			209876	400	409	Empty	true
Fed	Calcium-transporting ATPase sarcoplasmic-endoplasmic reticulum type	02437fasting_3_13258	Tityus2_.fasta	112.053,1	0.088	0	0	0	0	0.00784	EFTLEFSR	K	D	0.997	55.8	27	40.8	2.92	1	0	0	0	2	1028.5			466931	482	489	Empty	false	26540fed_2_24694
Fed	Speckle targeted PIP5K1A-regulated poly A polymerase	30528fed_3_3241	Tityus2_.fasta	88.361,4	0.796	1	1	1	0.000789	0.013	NVFDRTQVSR	K	K	0.953	35.9	27.5	20.5	0	1	0	0	0	2	1221.63			8608700	564	573	Empty	true
Fed	Zinc finger CCCH-type with G patch domain-containing protein	02385fasting_2_13173	Tityus2_.fasta	59.777,7	0.94	1	1	1	0.000789	0.0135	KDLLTLK	R	S	0.988	69.8	29.5	20	2.14	1	0	0	0	2	8305348			1359630	44	50	Empty	true
Fed	Homogentisate 1,2-dioxygenase	23688fed_1_201	Tityus2_.fasta	52.511,1	1	1	1	1	0.000789	0.0238	GNLFVITEFGR	K	M	0.997	41.9	27.7	38.1	3.15	1	0	0	0	2	1252.67			150939	162	172	Empty	true
Fed	Hemocyanin B chain	10939fasting_3_31133	Tityus2_.fasta	73.668,1	0.999	1	1	1	0.000789	0.0142	FVPIETLLK	K	A	0.997	51.3	25	43.3	1.92	1	0	0	0	2	1059.64			297614	122	130	Empty	true
Fed	Hemocyanin II	10999fasting_2_31207	Tityus2_.fasta	72.662,2	1	1	1	1	0.000789	0.0206	FVPAATMAEILSK	R	A	0.997	82.2	27.4	75	4.64	1	0	0	0	2	1377.74			269490	121	133	Empty	true
Fed	Ras GTPase-activating protein 3	17523fed_1_10020	Tityus2_.fasta	95.851,0	1	1	1	1	0.000789	0.00839	KIVSFLK	R	A	0.988	44.2	25	0	1.05	1	0	0	0	2	8345448			1357420	347	353	Empty	true
Fed	Hemocyanin F chain	10353fasting_2_29561	Tityus2_.fasta	71.568,2	1	4	4	4	0.00316	0.113	GVTVPPIQEIFPDR	K	F	0.997	63.9	25.6	61.5	1.08	1	0	0	0	2	1567.85			270298	105	118	Empty	false	19977fed_1_12930,02750fasting_2_13777
Fed	Hemocyanin F chain	10353fasting_2_29561	Tityus2_.fasta	71.568,2	1	4	4	4	0.00316	0.113	ILPLFEHLTSLTAK	R	Q	0.997	86.4	25	82.1	1.96	1	0	0	0	2	1582.92			220906	10	23	Empty	true
Fed	Hemocyanin F chain	10353fasting_2_29561	Tityus2_.fasta	71.568,2	1	4	4	4	0.00316	0.113	LSTGLKRMTPFQ	R	N	0.991	27.3	37	8.59	1.66	1	0	0	0	1	1378.75			413729	214	225	Empty	true
Fed	Hemocyanin F chain	10353fasting_2_29561	Tityus2_.fasta	71.568,2	1	4	4	4	0.00316	0.113	TPSQFATPNM	R	S	0.992	20.6	37.2	2.03	2.36	1	0	0	0	1	1093.5			841891	605	614	Empty	true
Fed	Hemocyanin F chain	10353fasting_2_29561	Tityus2_.fasta	71.568,2	1	4	4	4	0.00316	0.113	VPDVITTTMKEDVLQLSHGIK	K	T	0.997	121	25	115	7.11	1	0	0	0	2	2324.25			196884	400	420	Empty	true
Fed	Focal adhesion kinase 1	26084fed_1_23351	Tityus2_.fasta	119.288,9	0.999	1	1	2	0.00158	0.0125	NDSPITKYSSIPR	R	K	0.996	31.5	25.9	30.1	0.658	2	0	0	0	2	1477.76			2383210	327	339	Empty	true
Fed	Myelin expression factor 2	27015fed_2_25323	Tityus2_.fasta	47.590,9	1	1	1	1	0.000789	0.0224	VISIELKTDK	K	E	0.997	37.7	25.5	25.7	0.444	1	0	0	0	2	1145.68			1787850	236	245	Empty	true
Fed	Clathrin heavy chain 1	23349fed_1_20689	Tityus2_.fasta	191.384,3	0.957	1	1	1	0.000789	0.0054	LLLSWLEMR	K	V	0.991	17.2	27.6	0	0.187	1	0	0	0	2	1160.65			4719380	857	865	Empty	true
Fed	CLIP-associating protein 1	21163fed_3_15208	Tityus2_.fasta	83.872,0	1	3	3	3	0.00237	0.0627	IMSSAGIVAIRFIIQ	K	H	0.949	0	0	0	0.469	1	0	0	0	1	1618.93			304264	417	431	Empty	true
Fed	CLIP-associating protein 1	21163fed_3_15208	Tityus2_.fasta	83.872,0	1	3	3	3	0.00237	0.0627	QEAIKKGISDADPEARAFSRK	I	A	0.991	0	0	0	2.15	1	0	0	0	1	2300.2			190901	481	501	Empty	true
Fed	CLIP-associating protein 1	21163fed_3_15208	Tityus2_.fasta	83.872,0	1	3	3	3	0.00237	0.0627	QLEIPFQLSVK	R	D	0.997	20.4	25	0.71	2.52	1	0	0	0	2	1301.75			356403	361	371	Empty	true
Fed	Glutathione synthetase	14549fasting_2_3615	Tityus2_.fasta	53.554,1	0.986	1	1	1	0.000789	0.0465	SIQTDINAVIHNVAYDDKFLTK	K	T	0.997	115	25	115	8.24	1	0	0	0	2	2505.3			136556	64	85	Empty	true
Fed	unknown protein	06268fasting_2_579,23287fed_3_20624	Tityus2_.fasta	33.500,7	1	2	2	2	0.00158	0.0882	IDMENVVLSMQEVKVEAFK	K	Q	0.997	96	25	96	7.49	1	0	0	0	2	2209.12			237782	231	249	Empty	true
Fed	unknown protein	06268fasting_2_579,23287fed_3_20624	Tityus2_.fasta	33.500,7	1	2	2	2	0.00158	0.0882	LDAAIQFK	K	I	0.997	52.3	29.4	40.2	0.456	1	0	0	0	2	9055092			937187	118	125	Empty	true
Fed	Filamin-A	06594fasting_3_840	Tityus2_.fasta	237.867,5	1	4	4	4	0.00316	0.0338	AVGALVDAVAPGLCPDWPDWTPANALK	R	N	0.997	31.6	25	31.6	5.6	1	0	0	0	2	2804.41			52.524,5	171	197	Empty	true
Fed	Filamin-A	06594fasting_3_840	Tityus2_.fasta	237.867,5	1	4	4	4	0.00316	0.0338	IKVDGLEPSVFLDSPTDFIVDAR	K	A	0.997	98.8	25	94.8	9.41	1	0	0	0	2	2533.32			127126	841	863	Empty	true
Fed	Filamin-A	06594fasting_3_840	Tityus2_.fasta	237.867,5	1	4	4	4	0.00316	0.0338	LIALVEVLSGK	R	K	0.997	70.9	25	62	2.02	1	0	0	0	2	1141.72			176053	51	61	Empty	true
Fed	Filamin-A	06594fasting_3_840	Tityus2_.fasta	237.867,5	1	4	4	4	0.00316	0.0338	LPVAPGEYKIMVK	Y	F	0.997	13.6	36	2.46	6.09	1	0	0	0	1	1444.82			183612	1474	1486	Empty	true
Fed	Phosphoribosylformylglycinamidine synthase	00735fasting_3_11189,24419fed_1_79	Tityus2_.fasta	145.611,0	1	20	20	20	0.0158	0.256	CSGNWMWAAK	K	L	0.997	17.1	25	16.5	0.444	1	0	0	0	2	1210.51			846463	755	764	Empty	true
Fed	Phosphoribosylformylglycinamidine synthase	00735fasting_3_11189,24419fed_1_79	Tityus2_.fasta	145.611,0	1	20	20	20	0.0158	0.256	EIVEPSGAIIHCSK	K	F	0.997	49.5	26.6	48.4	2.57	1	0	0	0	2	1539.78			503409	533	546	Empty	true
Fed	Phosphoribosylformylglycinamidine synthase	00735fasting_3_11189,24419fed_1_79	Tityus2_.fasta	145.611,0	1	20	20	20	0.0158	0.256	EKCPVNFIGEVIGNGR	R	I	0.997	46.1	25.9	36.8	5.51	1	0	0	0	2	1788.91			195244	587	602	Empty	true
Fed	Phosphoribosylformylglycinamidine synthase	00735fasting_3_11189,24419fed_1_79	Tityus2_.fasta	145.611,0	1	20	20	20	0.0158	0.256	ESHRPSSFITHSGVR	K	H	0.997	65.8	25.8	65	2.36	1	0	0	0	2	1696.85			544071	293	307	Empty	true
Fed	Phosphoribosylformylglycinamidine synthase	00735fasting_3_11189,24419fed_1_79	Tityus2_.fasta	145.611,0	1	20	20	20	0.0158	0.256	EWVKPIMFSGGIGSIDAAFIK	R	K	0.997	46	25	45.3	3.1	1	0	0	0	2	2266.19			23.806,7	424	444	Empty	true
Fed	Phosphoribosylformylglycinamidine synthase	00735fasting_3_11189,24419fed_1_79	Tityus2_.fasta	145.611,0	1	20	20	20	0.0158	0.256	FGEPVILGFAR	K	S	0.997	79.5	27.7	78.2	9.03	1	0	0	0	2	1205.67			891592	401	411	Empty	true
Fed	Phosphoribosylformylglycinamidine synthase	00735fasting_3_11189,24419fed_1_79	Tityus2_.fasta	145.611,0	1	20	20	20	0.0158	0.256	FSDNSSAILGYAVNILLPK	K	E	0.997	112	25	109	5.92	1	0	0	0	2	2022.09			105735	274	292	Empty	true
Fed	Phosphoribosylformylglycinamidine synthase	00735fasting_3_11189,24419fed_1_79	Tityus2_.fasta	145.611,0	1	20	20	20	0.0158	0.256	GLLDPAAGAR	K	M	0.997	45	26.8	32.2	1.11	1	0	0	0	2	9405212			952095	723	732	Empty	true
Fed	Phosphoribosylformylglycinamidine synthase	00735fasting_3_11189,24419fed_1_79	Tityus2_.fasta	145.611,0	1	20	20	20	0.0158	0.256	GMEDSILGVWVAHGEGR	R	F	0.997	123	25	123	7.64	1	0	0	0	2	1812.87			257649	1203	1219	Empty	true
Fed	Phosphoribosylformylglycinamidine synthase	00735fasting_3_11189,24419fed_1_79	Tityus2_.fasta	145.611,0	1	20	20	20	0.0158	0.256	GWAAGLLFHRELEEQFNAFYNR	R	S	0.997	39.8	25	39.8	5.38	1	0	0	0	2	2668.31			86.450,1	1118	1139	Empty	true
Fed	Phosphoribosylformylglycinamidine synthase	00735fasting_3_11189,24419fed_1_79	Tityus2_.fasta	145.611,0	1	20	20	20	0.0158	0.256	HLAMMPHPER	R	C	0.997	58.5	26.9	49	4.89	1	0	0	0	2	1218.59			294720	1273	1282	Empty	true
Fed	Phosphoribosylformylglycinamidine synthase	00735fasting_3_11189,24419fed_1_79	Tityus2_.fasta	145.611,0	1	20	20	20	0.0158	0.256	IGVGGGSASSVHVQGDQK	R	A	0.997	157	26.3	152	6.19	1	0	0	0	2	1682.85			681399	464	481	Empty	true
Fed	Phosphoribosylformylglycinamidine synthase	00735fasting_3_11189,24419fed_1_79	Tityus2_.fasta	145.611,0	1	20	20	20	0.0158	0.256	IVIDGTEKKDSLIDMVMSTQQFSNSNNVIK	R	F	0.997	0	0	0	15.8	1	0	0	0	2	3354.69			284368	244	273	Empty	true
Fed	Phosphoribosylformylglycinamidine synthase	00735fasting_3_11189,24419fed_1_79	Tityus2_.fasta	145.611,0	1	20	20	20	0.0158	0.256	IVLEEKLNEERHPVDLELEHVLASMPR	R	K	0.997	41.8	35.4	9.87	3.82	1	0	0	0	2	3195.68			109907	603	629	Empty	true
Fed	Phosphoribosylformylglycinamidine synthase	00735fasting_3_11189,24419fed_1_79	Tityus2_.fasta	145.611,0	1	20	20	20	0.0158	0.256	LGGSALAQCFNQLGDNTADLDSPELLR	R	T	0.997	129	25	129	15.3	1	0	0	0	2	2875.39			442933	854	880	Empty	true
Fed	Phosphoribosylformylglycinamidine synthase	00735fasting_3_11189,24419fed_1_79	Tityus2_.fasta	145.611,0	1	20	20	20	0.0158	0.256	LNEERHPVDLELEHVLASMPR	K	K	0.997	94.6	25	94.6	13	1	0	0	0	2	2484.27			330801	609	629	Empty	true
Fed	Phosphoribosylformylglycinamidine synthase	00735fasting_3_11189,24419fed_1_79	Tityus2_.fasta	145.611,0	1	20	20	20	0.0158	0.256	MSVAEAVTNLMFAPISSLKDAK	R	C	0.997	134	25	134	11.4	1	0	0	0	2	2323.2			156993	733	754	Empty	true
Fed	Phosphoribosylformylglycinamidine synthase	00735fasting_3_11189,24419fed_1_79	Tityus2_.fasta	145.611,0	1	20	20	20	0.0158	0.256	NLTNDQLNSLSWILSR	K	G	0.997	147	25.4	147	9.18	1	0	0	0	2	1873.98			205108	52	67	Empty	true
Fed	Phosphoribosylformylglycinamidine synthase	00735fasting_3_11189,24419fed_1_79	Tityus2_.fasta	145.611,0	1	20	20	20	0.0158	0.256	NPTTVECFDLAQSNSEHSR	R	H	0.997	179	25	176	20	1	0	0	0	2	2191.97			570015	218	236	Empty	true
Fed	Phosphoribosylformylglycinamidine synthase	00735fasting_3_11189,24419fed_1_79	Tityus2_.fasta	145.611,0	1	20	20	20	0.0158	0.256	TGFEVTQNLITDNK	R	L	0.997	85.4	26.8	85	4.23	1	0	0	0	2	1579.8			638099	881	894	Empty	true
Fed	Dipeptidyl peptidase 4	00565fasting_2_11024	Tityus2_.fasta	68.973,7	0.986	1	1	2	0.00158	0.0183	KNYIYAWIDGR	R	G	0.997	23.6	26.5	13.4	1.16	2	0	0	0	2	1398.72			4574010	389	399	Empty	true
Fed	unknown protein	05978fasting_2_363	Tityus2_.fasta	75.890,9	1	2	2	2	0.00158	0.0469	GAQILISDGNTR	K	F	0.997	51.5	27.9	25.9	3.27	1	0	0	0	2	1244.66			429753	292	303	Empty	true
Fed	unknown protein	05978fasting_2_363	Tityus2_.fasta	75.890,9	1	2	2	2	0.00158	0.0469	SLVLDITKLEDIPELYLTAK	K	S	0.997	119	25	119	7.68	1	0	0	0	2	2274.28			522545	513	532	Empty	true
Fed	Tumor necrosis factor alpha-induced protein 8-like protein	16039fasting_1_5834	Tityus2_.fasta	21.541,8	0.986	1	1	2	0.00158	0.0479	SLLKDLVVR	R	H	0.997	59.7	25.7	45.2	1.44	2	0	0	0	2	1042.66			803842	127	135	Empty	true
Fed	Alpha-2-macroglobulin	23681fed_1_2	Tityus2_.fasta	88.588,8	0.986	1	1	1	0.000789	0.034	FSLTQWFSATGHNLQIEPVSSAVECGK	R	L	0.997	60	25	60	8.49	1	0	0	0	2	2993.45			49.392,2	61	87	Empty	true
Fed	unknown protein	06549fasting_1_798	Tityus2_.fasta	42.296,1	0.986	1	1	1	0.000789	0.0535	LDLNHFFGGNTPFIYIGEAK	K	K	0.997	71.3	25	71.3	6.01	1	0	0	0	2	2253.13			88.320,7	20	39	Empty	true
Fed	Leukocyte elastase inhibitor	05846fasting_2_272	Tityus2_.fasta	42.526,4	1	2	2	2	0.00158	0.073	ELTNDIFKDFFTHFR	R	K	0.997	96	25.4	96	5.06	1	0	0	0	2	1929.95			117994	241	255	Empty	true
Fed	Leukocyte elastase inhibitor	05846fasting_2_272	Tityus2_.fasta	42.526,4	1	2	2	2	0.00158	0.073	QLKEDLQIFGFK	R	T	0.997	58.5	25.2	46.7	3.17	1	0	0	0	2	1465.81			154515	273	284	Empty	true
Fed	Hemocyanin AA6 chain	10337fasting_2_29538,29086fed_2_1376	Tityus2_.fasta	71.794,0	1	5	5	5	0.00395	0.158	EKLPVSERDDRLK	R	G	0.997	0	0	0	3.68	1	0	0	0	2	1584.87			414822	23	35	Empty	true
Fed	Hemocyanin AA6 chain	10337fasting_2_29538,29086fed_2_1376	Tityus2_.fasta	71.794,0	1	5	5	5	0.00395	0.158	IPLDVEHGTDILGDIIESSDESK	K	N	0.997	67.6	25	67.1	6.35	1	0	0	0	2	2482.22			204892	291	313	Empty	true
Fed	Hemocyanin AA6 chain	10337fasting_2_29538,29086fed_2_1376	Tityus2_.fasta	71.794,0	1	5	5	5	0.00395	0.158	LFIELDKFYATLAAGK	R	T	0.997	138	25	130	9.85	1	0	0	0	2	1799.99			77.917,7	480	495	Empty	true
Fed	Hemocyanin AA6 chain	10337fasting_2_29538,29086fed_2_1376	Tityus2_.fasta	71.794,0	1	5	5	5	0.00395	0.158	MIPFHNFEEPLEGYAPHLTSLVSGLQYASRPEGYSIK	R	D	0.997	148	25	148	7.19	1	0	0	0	2	4178.07			153054	221	257	Empty	true
Fed	Hemocyanin AA6 chain	10337fasting_2_29538,29086fed_2_1376	Tityus2_.fasta	71.794,0	1	5	5	5	0.00395	0.158	TPNVVTTLTK	K	E	0.997	73.4	27.7	67.6	4.35	1	0	0	0	2	1073.62			367152	400	409	Empty	true
Fed	Calcium-transporting ATPase sarcoplasmic-endoplasmic reticulum type	26540fed_2_24694	Tityus2_.fasta	109.900,1	1	2	2	2	0.00158	0.023	EFTLEFSR	K	D	0.997	55.8	27	40.8	2.92	1	0	0	0	2	1028.5			466931	483	490	Empty	true	02437fasting_3_13258
Fed	Calcium-transporting ATPase sarcoplasmic-endoplasmic reticulum type	26540fed_2_24694	Tityus2_.fasta	109.900,1	1	2	2	2	0.00158	0.023	VGEATETALIVLAEK	K	M	0.997	116	25.1	110	6.66	1	0	0	0	2	1543.86			246390	438	452	Empty	true
Fed	Ovostatin	06146fasting_1_496	Tityus2_.fasta	75.909,7	0.986	1	1	1	0.000789	0.047	NNPSNYDLAIFAYTATLTNDLDAEKYLEQLLK	K	N	0.997	39.6	25	39.6	2.64	1	0	0	0	2	3661.83			80.423,8	533	564	Empty	true
Fed	unknown protein	06266fasting_2_577,21059fed_3_15073	Tityus2_.fasta	16.893,8	0.809	1	1	1	0.000789	0.0537	VIFDYLLK	K	V	0.957	23.8	25	21	0	1	0	0	0	2	1010.59			214315	131	138	Empty	true
Fed	unknown protein	23775fed_2_268	Tityus2_.fasta	31.465,8	1	2	2	2	0.00158	0.0787	IVYMGNVDTVR	R	S	0.997	64.2	27.4	60.7	1.3	1	0	0	0	2	1266.65			485020	160	170	Empty	true
Fed	unknown protein	23775fed_2_268	Tityus2_.fasta	31.465,8	1	2	2	2	0.00158	0.0787	YIYGPTALFK	R	S	0.989	35.6	28	29.6	0	1	0	0	0	2	1172.64			318586	138	147	Empty	true
Fed	unknown protein	28337fed_3_28112,28338fed_3_28114	Tityus2_.fasta	5.796,5	1	5	8	9	0.0071	0.725	CKNPAESFIVELDK	K	C	0.997	83.1	37.9	3.31	9.09	3	0	0	0	2	1632.79			999438	17	30	Empty	true
Fed	unknown protein	28337fed_3_28112,28338fed_3_28114	Tityus2_.fasta	5.796,5	1	5	8	9	0.0071	0.725	CKNPAESFIVELDKCAIPCEPK	K	F	0.997	128	37.4	12.2	11.4	3	0	0	0	2	2588.22			1022520	17	38	Empty	true
Fed	unknown protein	28337fed_3_28112,28338fed_3_28114	Tityus2_.fasta	5.796,5	1	5	8	9	0.0071	0.725	DKCAIPCEPK	L	F	0.982	15.8	34.3	-0.93	1.11	1	0	0	0	1	1217.57			778646	29	38	Empty	true
Fed	unknown protein	28337fed_3_28112,28338fed_3_28114	Tityus2_.fasta	5.796,5	1	5	8	9	0.0071	0.725	GGESCEKVENNDVCK	M	C	0.997	72.9	32.9	0	0	1	0	0	0	1	1738.74			17.747,8	2	16	Empty	true
Fed	unknown protein	28337fed_3_28112,28338fed_3_28114	Tityus2_.fasta	5.796,5	1	5	8	9	0.0071	0.725	NPAESFIVELDKCAIPCEPK	K	F	0.997	155	25	155	12.3	1	0	0	0	2	2317.12			498715	19	38	Empty	true
Fed	Hemocyanin AA6 chain	04165fasting_1_16742,27819fed_3_26963	Tityus2_.fasta	71.668,1	1	4	5	5	0.00395	0.104	DLKDVDVQDMER	R	W	0.997	45.2	25.7	37.4	2.37	1	0	0	0	2	1462.68			372977	257	268	Empty	true
Fed	Hemocyanin AA6 chain	04165fasting_1_16742,27819fed_3_26963	Tityus2_.fasta	71.668,1	1	4	5	5	0.00395	0.104	ILSLFEHLTSLTEK	R	Q	0.997	94.6	25	82.7	3.92	1	0	0	0	2	1630.91			337832	10	23	Empty	true
Fed	Hemocyanin AA6 chain	04165fasting_1_16742,27819fed_3_26963	Tityus2_.fasta	71.668,1	1	4	5	5	0.00395	0.104	NLQEFLTPNIHVTDIDIKFDG	R	-	0.997	37.2	25	37.2	2.54	1	0	0	0	2	2429.24			78.738,7	605	625	Empty	true
Fed	Hemocyanin AA6 chain	04165fasting_1_16742,27819fed_3_26963	Tityus2_.fasta	71.668,1	1	4	5	5	0.00395	0.104	NQEFYGSLHNWGHVLMAR	R	I	0.997	68.6	25	68.6	4.8	2	0	0	0	2	2159.02			479421	313	330	Empty	true
Fed	L-like cysteine peptidase 1	33787Fed_cathepsin	Tityus2_.fasta	21.742,8	0.999	1	1	1	0.000789	0.0707	QSVGATCTGYVDVK	R	S	0.997	119	25.6	105	6.28	1	0	0	0	2	1484.71			615499	83	96	Empty	true
Fed	Apical endosomal glycoprotein	13927fasting_1_2788	Tityus2_.fasta	169.557,3	1	2	2	2	0.00158	0.0223	GIIPLYSEVKEYQVIFEGIVGNGNK	R	G	0.997	71	25	71	9.72	1	0	0	0	2	2766.47			319629	470	494	Empty	true
Fed	Apical endosomal glycoprotein	13927fasting_1_2788	Tityus2_.fasta	169.557,3	1	2	2	2	0.00158	0.0223	VQNFELVK	R	I	0.977	50	28.6	36.5	0	1	0	0	0	2	9765462			409561	881	888	Empty	true
Fed	MAM and LDL-receptor class A domain-containing protein C10orf112	19500fed_1_12131	Tityus2_.fasta	73.429,4	1	5	5	5	0.00395	0.072	DGWFAVLSGK	K	K	0.997	59.2	28.6	48.6	2.39	1	0	0	0	2	1079.55			475970	517	526	Empty	true
Fed	MAM and LDL-receptor class A domain-containing protein C10orf112	19500fed_1_12131	Tityus2_.fasta	73.429,4	1	5	5	5	0.00395	0.072	FLYFFGER	K	N	0.997	44.2	28.6	36.2	1.82	1	0	0	0	2	1078.54			626570	297	304	Empty	true
Fed	MAM and LDL-receptor class A domain-containing protein C10orf112	19500fed_1_12131	Tityus2_.fasta	73.429,4	1	5	5	5	0.00395	0.072	MFLEIKR	K	N	0.988	47.2	26.4	37.4	1.02	1	0	0	0	2	9365336			408582	581	587	Empty	true
Fed	MAM and LDL-receptor class A domain-containing protein C10orf112	19500fed_1_12131	Tityus2_.fasta	73.429,4	1	5	5	5	0.00395	0.072	TTAPSYDSLK	K	K	0.997	51.8	28.2	43	1.55	1	0	0	0	2	1082.54			598186	505	514	Empty	true
Fed	MAM and LDL-receptor class A domain-containing protein C10orf112	19500fed_1_12131	Tityus2_.fasta	73.429,4	1	5	5	5	0.00395	0.072	WTLQSGFSQLK	K	K	0.997	69.7	27.6	64.7	3.74	1	0	0	0	2	1294.68			189352	271	281	Empty	true
Fed	Hemocyanin F chain	02750fasting_2_13777,19977fed_1_12930	Tityus2_.fasta	72.730,8	1	6	6	6	0.00474	0.0937	DLKEVAVQDMER	R	W	0.997	54.7	27	47.1	3.72	1	0	0	0	2	1432.71			521496	258	269	Empty	true
Fed	Hemocyanin F chain	02750fasting_2_13777,19977fed_1_12930	Tityus2_.fasta	72.730,8	1	6	6	6	0.00474	0.0937	FIPAETINAALK	R	A	0.997	49.4	26.2	39.8	1.74	1	0	0	0	2	1287.73			648365	119	130	Empty	true
Fed	Hemocyanin F chain	02750fasting_2_13777,19977fed_1_12930	Tityus2_.fasta	72.730,8	1	6	6	6	0.00474	0.0937	GVTVPPIQEIFPDR	R	F	0.997	63.9	25.6	61.5	1.08	1	0	0	0	2	1567.85			270298	105	118	Empty	true	10353fasting_2_29561
Fed	Hemocyanin F chain	02750fasting_2_13777,19977fed_1_12930	Tityus2_.fasta	72.730,8	1	6	6	6	0.00474	0.0937	GVTVPPIQEIFPDRFIPAETINAALK	R	A	0.997	21.6	25	8	1.23	1	0	0	0	2	2836.56			495145	105	130	Empty	true
Fed	Hemocyanin F chain	02750fasting_2_13777,19977fed_1_12930	Tityus2_.fasta	72.730,8	1	6	6	6	0.00474	0.0937	IIPLFEHLTSLTR	R	K	0.997	68.6	25	63.7	2.05	1	0	0	0	2	1539.89			446140	10	22	Empty	true
Fed	Hemocyanin F chain	02750fasting_2_13777,19977fed_1_12930	Tityus2_.fasta	72.730,8	1	6	6	6	0.00474	0.0937	TIADFVTK	R	N	0.997	38.4	28.4	31	2.42	1	0	0	0	2	8944932			295129	605	612	Empty	true
Fed	MAM and LDL-receptor class A domain-containing protein C10orf112	23622fed_2_152	Tityus2_.fasta	580.276,3	1	28	28	28	0.0221	0.0718	DGTLDYPLWSIK	K	G	0.997	43.4	27.1	42.6	1.89	1	0	0	0	2	1407.72			220963	768	779	Empty	true
Fed	MAM and LDL-receptor class A domain-containing protein C10orf112	23622fed_2_152	Tityus2_.fasta	580.276,3	1	28	28	28	0.0221	0.0718	EEGKLTSPLYAHK	K	M	0.997	40.1	27.2	38.2	2.02	1	0	0	0	2	1472.77			189523	219	231	Empty	true
Fed	MAM and LDL-receptor class A domain-containing protein C10orf112	23622fed_2_152	Tityus2_.fasta	580.276,3	1	28	28	28	0.0221	0.0718	FLNYWIK	K	S	0.988	22.8	27.5	13.9	0.796	1	0	0	0	2	9835349			335372	2273	2279	Empty	true
Fed	MAM and LDL-receptor class A domain-containing protein C10orf112	23622fed_2_152	Tityus2_.fasta	580.276,3	1	28	28	28	0.0221	0.0718	FRFFYTYSIPSFTHLR	K	Y	0.995	14.5	25	14.5	1.59	1	0	0	0	2	2082.06			103407	2979	2994	Empty	true
Fed	MAM and LDL-receptor class A domain-containing protein C10orf112	23622fed_2_152	Tityus2_.fasta	580.276,3	1	28	28	28	0.0221	0.0718	FWYFLQGK	R	H	0.997	16.2	28.8	12.3	1.34	1	0	0	0	2	1088.56			219194	239	246	Empty	true
Fed	MAM and LDL-receptor class A domain-containing protein C10orf112	23622fed_2_152	Tityus2_.fasta	580.276,3	1	28	28	28	0.0221	0.0718	GHYIALDHTSKYHR	R	S	0.997	89.1	25.6	89.1	6.64	1	0	0	0	2	1697.85			174753	2214	2227	Empty	true
Fed	MAM and LDL-receptor class A domain-containing protein C10orf112	23622fed_2_152	Tityus2_.fasta	580.276,3	1	28	28	28	0.0221	0.0718	GIAVDDIVLSK	R	Y	0.997	70.7	27	58	0.585	1	0	0	0	2	1129.65			712678	2133	2143	Empty	true
Fed	MAM and LDL-receptor class A domain-containing protein C10orf112	23622fed_2_152	Tityus2_.fasta	580.276,3	1	28	28	28	0.0221	0.0718	GSIGDYWIR	K	S	0.997	75.5	28.5	68.7	3.05	1	0	0	0	2	1066.53			367911	3866	3874	Empty	true
Fed	MAM and LDL-receptor class A domain-containing protein C10orf112	23622fed_2_152	Tityus2_.fasta	580.276,3	1	28	28	28	0.0221	0.0718	GYYIYVK	K	A	0.988	22.3	30	22.3	1.33	1	0	0	0	2	9054767			418383	878	884	Empty	true
Fed	MAM and LDL-receptor class A domain-containing protein C10orf112	23622fed_2_152	Tityus2_.fasta	580.276,3	1	28	28	28	0.0221	0.0718	HSDILEVLK	K	L	0.997	72.2	26.4	63.1	4.33	1	0	0	0	2	1053.59			522867	247	255	Empty	true
Fed	MAM and LDL-receptor class A domain-containing protein C10orf112	23622fed_2_152	Tityus2_.fasta	580.276,3	1	28	28	28	0.0221	0.0718	IALISSTTFLPTFAK	R	D	0.997	86.5	25	76.7	4.92	1	0	0	0	2	1609.92			224397	3387	3401	Empty	true
Fed	MAM and LDL-receptor class A domain-containing protein C10orf112	23622fed_2_152	Tityus2_.fasta	580.276,3	1	28	28	28	0.0221	0.0718	KEPFSLSFSR	R	V	0.997	54.3	27.1	31.5	1.72	1	0	0	0	2	1197.63			333588	3673	3682	Empty	true
Fed	MAM and LDL-receptor class A domain-containing protein C10orf112	23622fed_2_152	Tityus2_.fasta	580.276,3	1	28	28	28	0.0221	0.0718	LLSPFLTSK	R	N	0.997	58.9	25.7	42.8	1.07	1	0	0	0	2	1005.6			475629	2554	2562	Empty	true
Fed	MAM and LDL-receptor class A domain-containing protein C10orf112	23622fed_2_152	Tityus2_.fasta	580.276,3	1	28	28	28	0.0221	0.0718	LNFNVLIEGK	K	Q	0.997	77.6	27.2	52.5	2.6	1	0	0	0	2	1146.65			176275	3456	3465	Empty	true
Fed	MAM and LDL-receptor class A domain-containing protein C10orf112	23622fed_2_152	Tityus2_.fasta	580.276,3	1	28	28	28	0.0221	0.0718	LTVPLSVK	R	L	0.977	55.3	25	39.5	0	1	0	0	0	2	8565503			402873	3448	3455	Empty	true
Fed	MAM and LDL-receptor class A domain-containing protein C10orf112	23622fed_2_152	Tityus2_.fasta	580.276,3	1	28	28	28	0.0221	0.0718	NSYYKWEIK	K	T	0.997	56	27.3	49.8	3.15	1	0	0	0	2	1230.62			172065	2184	2192	Empty	true
Fed	MAM and LDL-receptor class A domain-containing protein C10orf112	23622fed_2_152	Tityus2_.fasta	580.276,3	1	28	28	28	0.0221	0.0718	SIFDDGPK	R	S	0.997	57.6	30	46	0.538	1	0	0	0	2	8784256			635129	45	52	Empty	true
Fed	MAM and LDL-receptor class A domain-containing protein C10orf112	23622fed_2_152	Tityus2_.fasta	580.276,3	1	28	28	28	0.0221	0.0718	SISLSYIDHESDKK	R	A	0.997	72.5	26.4	70.6	2.28	1	0	0	0	2	1621.81			419747	419	432	Empty	true
Fed	MAM and LDL-receptor class A domain-containing protein C10orf112	23622fed_2_152	Tityus2_.fasta	580.276,3	1	28	28	28	0.0221	0.0718	SNANLAVNKWTEFVSK	K	I	0.997	79.7	25.1	78.4	4.16	1	0	0	0	2	1807.93			233162	1592	1607	Empty	true
Fed	MAM and LDL-receptor class A domain-containing protein C10orf112	23622fed_2_152	Tityus2_.fasta	580.276,3	1	28	28	28	0.0221	0.0718	SPDYISWEWLDGSTSNPQTGPEFDHTFGTK	K	D	0.997	208	25	208	17.2	1	0	0	0	2	3399.51			435667	679	708	Empty	true
Fed	MAM and LDL-receptor class A domain-containing protein C10orf112	23622fed_2_152	Tityus2_.fasta	580.276,3	1	28	28	28	0.0221	0.0718	STGESPFNGEKPETDHTTNTVTGK	R	F	0.997	89.5	25	89.5	8.92	1	0	0	0	2	2534.16			1104210	1837	1860	Empty	true
Fed	MAM and LDL-receptor class A domain-containing protein C10orf112	23622fed_2_152	Tityus2_.fasta	580.276,3	1	28	28	28	0.0221	0.0718	TDSEIRLENNVPIFSK	R	I	0.997	77.1	25.1	73.1	7.31	1	0	0	0	2	1861.97			384074	1908	1923	Empty	true
Fed	MAM and LDL-receptor class A domain-containing protein C10orf112	23622fed_2_152	Tityus2_.fasta	580.276,3	1	28	28	28	0.0221	0.0718	TLPSPFSVDASWLR	R	V	0.997	93.9	26.6	91	5.4	1	0	0	0	2	1575.82			521701	337	350	Empty	true
Fed	MAM and LDL-receptor class A domain-containing protein C10orf112	23622fed_2_152	Tityus2_.fasta	580.276,3	1	28	28	28	0.0221	0.0718	TTISLWK	K	E	0.988	41	29.4	23.4	1.92	1	0	0	0	2	8484877			601711	262	268	Empty	true
Fed	MAM and LDL-receptor class A domain-containing protein C10orf112	23622fed_2_152	Tityus2_.fasta	580.276,3	1	28	28	28	0.0221	0.0718	VSGSESGSLFR	R	L	0.976	30	27.5	19.6	0	1	0	0	0	2	1125.55			242182	351	361	Empty	true
Fed	MAM and LDL-receptor class A domain-containing protein C10orf112	23622fed_2_152	Tityus2_.fasta	580.276,3	1	28	28	28	0.0221	0.0718	YIFQAVMGK	R	S	0.997	64.8	28	56.2	1.11	1	0	0	0	2	1056.55			738337	2461	2469	Empty	true
Fed	MAM and LDL-receptor class A domain-containing protein C10orf112	23622fed_2_152	Tityus2_.fasta	580.276,3	1	28	28	28	0.0221	0.0718	YSDYQGQGPLTIYTR	R	Q	0.997	109	25.2	109	10.3	1	0	0	0	2	1761.84			295246	2995	3009	Empty	true
Fed	MAM and LDL-receptor class A domain-containing protein C10orf112	23622fed_2_152	Tityus2_.fasta	580.276,3	1	28	28	28	0.0221	0.0718	YSNSIVPIWSEKGDEGDEWHAAQVSVTPTSSEPFR	K	Y	0.997	97.7	25	97.7	17	1	0	0	0	2	3905.83			564146	2426	2460	Empty	true
Fed	Hemocyanin A chain	00606fasting_1_11060,29470fed_3_1831	Tityus2_.fasta	72.289,1	0.983	1	1	1	0.000789	0.0382	TNNVINTFLKEDELELSHSINVGR	R	Q	0.997	14.7	25	13.9	0.301	1	0	0	0	2	2742.41			30.932,5	400	423	Empty	true
Fed	Hemocyanin F chain	10353fasting_2_29561	Tityus2_.fasta	71.568,2	1	5	5	7	0.00514	0.133	FVPAETINHALK	R	A	0.997	38.3	26	38.3	1.62	1	0	0	0	2	1339.74			294399	119	130	Empty	true
Fed	Hemocyanin F chain	10353fasting_2_29561	Tityus2_.fasta	71.568,2	1	5	5	7	0.00514	0.133	GVTVPPIQEIFPDR	K	F	0.997	69.2	25.6	66.8	1.11	1	0	0	0	2	1567.85			375901	105	118	Empty	false	19977fed_1_12930,02750fasting_2_13777
Fed	Hemocyanin F chain	10353fasting_2_29561	Tityus2_.fasta	71.568,2	1	5	5	7	0.00514	0.133	ILPLFEHLTSLTAK	R	Q	0.997	84.6	25	71.4	5.89	1	0	0	0	2	1582.92			233573	10	23	Empty	true
Fed	Hemocyanin F chain	10353fasting_2_29561	Tityus2_.fasta	71.568,2	1	5	5	7	0.00514	0.133	LSTGLKRMTPFQ	R	N	0.976	0	0	0	0.886	3	0	0	0	1	1378.75			2224920	214	225	Empty	true
Fed	Hemocyanin F chain	10353fasting_2_29561	Tityus2_.fasta	71.568,2	1	5	5	7	0.00514	0.133	TPSQFATPNM	R	S	0.987	19.1	37.5	2.7	0.585	1	0	0	0	1	1093.5			543538	605	614	Empty	true
Fed	Hemocyanin F chain	10353fasting_2_29561	Tityus2_.fasta	71.568,2	1	5	5	7	0.00514	0.133	VPDVITTTMKEDVLQLSHGIK	K	T	0.997	103	25	96.3	9.72	1	0	0	0	2	2324.25			246230	400	420	Empty	true
Fed	L-like cysteine peptidase 1	33787Fed_cathepsin	Tityus2_.fasta	21.742,8	0.978	1	1	1	0.000734	0.0707	QSVGATCTGYVDVK	R	S	0.997	119	25.6	105	8.47	1	0	0	0	2	1484.71			381409	83	96	Empty	true
Fed	unknown protein	06549fasting_1_798	Tityus2_.fasta	42.296,1	1	2	2	2	0.00147	0.0882	LDLNHFFGGNTPFIYIGEAK	K	K	0.997	74.6	25	74.6	6.12	1	0	0	0	2	2253.13			333013	20	39	Empty	true
Fed	unknown protein	06549fasting_1_798	Tityus2_.fasta	42.296,1	1	2	2	2	0.00147	0.0882	TPCFPLELIEPLK	I	F	0.953	0	0	0	0.481	1	0	0	0	1	1556.84			85.336,4	138	150	Empty	true
Fed	unknown protein	24180fed_3_595	Tityus2_.fasta	38.849,0	0.999	1	1	1	0.000734	0.0284	TVSTGDMLSR	K	T	0.997	66	28.5	62.3	0.678	1	0	0	0	2	1066.52			583300	215	224	Empty	true
Fed	Zinc finger CCCH-type with G patch domain-containing protein	02385fasting_2_13173	Tityus2_.fasta	59.777,7	0.907	1	1	1	0.000734	0.0135	KDLLTLK	R	S	0.988	69.8	29.5	20	1.17	1	0	0	0	2	8305348			2655190	44	50	Empty	true
Fed	Hemocyanin B chain	10939fasting_3_31133	Tityus2_.fasta	73.668,1	1	5	5	5	0.00367	0.126	DFVNEGLYIYAVAVAILHR	R	K	0.997	115	25	115	8.15	1	0	0	0	2	2163.16			71.244,1	85	103	Empty	true
Fed	Hemocyanin B chain	10939fasting_3_31133	Tityus2_.fasta	73.668,1	1	5	5	5	0.00367	0.126	FIDDMFQEYKK	R	T	0.997	88.7	26.5	87	5.26	1	0	0	0	2	1463.69			342357	367	377	Empty	true
Fed	Hemocyanin B chain	10939fasting_3_31133	Tityus2_.fasta	73.668,1	1	5	5	5	0.00367	0.126	FVPIETLLK	K	A	0.997	50.9	25	42.5	1.89	1	0	0	0	2	1059.64			322071	122	130	Empty	true
Fed	Hemocyanin B chain	10939fasting_3_31133	Tityus2_.fasta	73.668,1	1	5	5	5	0.00367	0.126	LASMHDDKEEVIVQSEK	K	T	0.997	29.6	25	25.3	3.64	1	0	0	0	2	1973.95			179550	134	150	Empty	true
Fed	Hemocyanin B chain	10939fasting_3_31133	Tityus2_.fasta	73.668,1	1	5	5	5	0.00367	0.126	LMVELDKFSTELEPGVNTIEHSSR	R	D	0.997	148	25	148	9.85	1	0	0	0	2	2731.36			269095	484	507	Empty	true
Fed	Hemocyanin II	10999fasting_2_31207	Tityus2_.fasta	72.662,2	1	6	6	6	0.0044	0.171	ASTKPAGDESPIVVDVK	K	E	0.997	69.1	25.6	60.1	8.59	1	0	0	0	2	1712.91			371051	134	150	Empty	true
Fed	Hemocyanin II	10999fasting_2_31207	Tityus2_.fasta	72.662,2	1	6	6	6	0.0044	0.171	EQLSFPGVDVVDIR	K	V	0.997	70.2	26.4	59.5	3.82	1	0	0	0	2	1573.82			235858	386	399	Empty	true
Fed	Hemocyanin II	10999fasting_2_31207	Tityus2_.fasta	72.662,2	1	6	6	6	0.0044	0.171	FVPAATMAEILSK	R	A	0.997	90.8	27.4	82.8	4.14	1	0	0	0	2	1377.74			420694	121	133	Empty	true
Fed	Hemocyanin II	10999fasting_2_31207	Tityus2_.fasta	72.662,2	1	6	6	6	0.0044	0.171	HLSLATVGGEVPHEQR	K	D	0.997	84.8	25.3	84.8	9.62	1	0	0	0	2	1729.9			331114	16	31	Empty	true
Fed	Hemocyanin II	10999fasting_2_31207	Tityus2_.fasta	72.662,2	1	6	6	6	0.0044	0.171	HLYEVFYEAKDFDDFVHLAQEAR	R	T	0.997	116	25	116	20.5	1	0	0	0	2	2842.35			125689	61	83	Empty	true
Fed	Hemocyanin II	10999fasting_2_31207	Tityus2_.fasta	72.662,2	1	6	6	6	0.0044	0.171	MVPFHNFDEELEGYAPHLSHLSSGR	R	Y	0.997	66.5	25	66.5	8.17	1	0	0	0	2	2869.34			243190	225	249	Empty	true
Fed	Fumarylacetoacetase	15148fasting_3_4542	Tityus2_.fasta	50.929,5	0.978	1	1	1	0.000734	0.0417	ASSVVVSGTPIHRPHGQTR	R	A	0.997	35.5	25	35.5	2.59	1	0	0	0	2	1986.06			156295	163	181	Empty	true
Fed	unknown protein	06266fasting_2_577,21059fed_3_15073	Tityus2_.fasta	16.893,8	0.978	1	1	1	0.000734	0.0537	VIFDYLLK	K	V	0.997	21.8	25	19.4	0.638	1	0	0	0	2	1010.59			282776	131	138	Empty	true
Fed	Ras GTPase-activating protein 3	17523fed_1_10020	Tityus2_.fasta	95.851,0	0.998	1	1	1	0.000734	0.00839	KIVSFLK	R	A	0.988	45	25	0	4.52	1	0	0	0	2	8345448			2667980	347	353	Empty	true
Fed	Focal adhesion kinase 1	26084fed_1_23351	Tityus2_.fasta	119.288,9	1	2	2	3	0.0022	0.025	LFPTLPVWSHKEI	K	E	0.952	0	0	0	0.523	1	0	0	0	1	1566.87			313009	897	909	Empty	true
Fed	Focal adhesion kinase 1	26084fed_1_23351	Tityus2_.fasta	119.288,9	1	2	2	3	0.0022	0.025	NDSPITKYSSIPR	R	K	0.997	31.5	25.9	26.6	0.678	2	0	0	0	2	1477.76			1926600	327	339	Empty	true
Fed	Glycogen debranching enzyme	17971fed_2_10460	Tityus2_.fasta	176.900,0	0.998	1	1	1	0.000734	0.0122	IPELFLIDVDSLTEEFIKK	K	V	0.997	135	25	135	5.2	1	0	0	0	2	2249.23			109366	312	330	Empty	true
Fed	Myelin expression factor 2	27015fed_2_25323	Tityus2_.fasta	47.590,9	0.978	1	1	1	0.000734	0.0224	VISIELKTDK	K	E	0.997	39.1	25.5	26.7	0.77	1	0	0	0	2	1145.68			1480800	236	245	Empty	true
Fed	CLIP-associating protein 1	21163fed_3_15208	Tityus2_.fasta	83.872,0	1	2	2	3	0.0022	0.0347	IMSSAGIVAIRFIIQ	K	H	0.985	0	0	0	0.678	1	0	0	0	1	1618.93			585878	417	431	Empty	true
Fed	CLIP-associating protein 1	21163fed_3_15208	Tityus2_.fasta	83.872,0	1	2	2	3	0.0022	0.0347	QLEIPFQLSVK	R	D	0.997	22.5	25	2.59	1.03	2	0	0	0	2	1301.75			814005	361	371	Empty	true
Fed	unknown protein	06268fasting_2_579,23287fed_3_20624	Tityus2_.fasta	33.500,7	0.988	1	1	1	0.000734	0.0261	LDAAIQFK	K	I	0.997	67.4	29.4	54	0.699	1	0	0	0	2	9055092			422666	118	125	Empty	true
Fed	Ovostatin	06146fasting_1_496	Tityus2_.fasta	75.909,7	0.978	1	1	1	0.000734	0.0162	FINVDQTELER	K	S	0.997	30.2	27.7	22.9	2.37	1	0	0	0	2	1363.69			655551	455	465	Empty	true	23681fed_1_2
Fed	Alpha-2-macroglobulin	23681fed_1_2	Tityus2_.fasta	88.588,8	0.985	1	1	1	0.000734	0.0479	FINVDQTELER	K	S	0.997	30.2	27.7	22.9	2.37	1	0	0	0	2	1363.69			655551	714	724	Empty	false	06146fasting_1_496
Fed	Alpha-2-macroglobulin	23681fed_1_2	Tityus2_.fasta	88.588,8	0.985	1	1	1	0.000734	0.0479	FSLTQWFSATGHNLQIEPVSSAVECGK	R	L	0.997	194	25	194	21.2	1	0	0	0	2	2993.45			190688	61	87	Empty	true
Fed	Filamin-A	06594fasting_3_840	Tityus2_.fasta	237.867,5	1	8	8	8	0.00587	0.0644	AGGNAPLNVTIADEEYRPVDLK	K	I	0.992	2	25	2	1.03	1	0	0	0	2	2342.2			2425810	674	695	Empty	true
Fed	Filamin-A	06594fasting_3_840	Tityus2_.fasta	237.867,5	1	8	8	8	0.00587	0.0644	AVGALVDAVAPGLCPDWPDWTPANALK	R	N	0.997	28	25	28	4.32	1	0	0	0	2	2804.41			28.779,4	171	197	Empty	true
Fed	Filamin-A	06594fasting_3_840	Tityus2_.fasta	237.867,5	1	8	8	8	0.00587	0.0644	IKVDGLEPSVFLDSPTDFIVDAR	K	A	0.997	98.7	25	95.1	8.68	1	0	0	0	2	2533.32			290447	841	863	Empty	true
Fed	Filamin-A	06594fasting_3_840	Tityus2_.fasta	237.867,5	1	8	8	8	0.00587	0.0644	LIALVEVLSGK	R	K	0.997	70.8	25	62.2	1.68	1	0	0	0	2	1141.72			186651	51	61	Empty	true
Fed	Filamin-A	06594fasting_3_840	Tityus2_.fasta	237.867,5	1	8	8	8	0.00587	0.0644	LPDVPINNFTSDWNDGR	K	A	0.997	125	25	125	9.55	1	0	0	0	2	1959.92			215428	154	170	Empty	true
Fed	Filamin-A	06594fasting_3_840	Tityus2_.fasta	237.867,5	1	8	8	8	0.00587	0.0644	LPVAPGEYKIMVK	Y	F	0.997	19.2	37.3	13.9	0.796	1	0	0	0	1	1444.82			175721	1474	1486	Empty	true
Fed	Filamin-A	06594fasting_3_840	Tityus2_.fasta	237.867,5	1	8	8	8	0.00587	0.0644	NINNLETDLADGLR	K	L	0.997	93.1	26.6	91.5	4.38	1	0	0	0	2	1557.79			255913	37	50	Empty	true
Fed	Filamin-A	06594fasting_3_840	Tityus2_.fasta	237.867,5	1	8	8	8	0.00587	0.0644	VFTENAGDGVLNVK	K	V	0.997	119	27.3	111	5.28	1	0	0	0	2	1462.75			356547	479	492	Empty	true
Fed	Trifunctional purine biosynthetic protein adenosine-3	06372fasting_3_662,23730fed_2_236	Tityus2_.fasta	46.774,3	0.978	1	1	1	0.000734	0.03	GVIVSETKEEAVK	K	A	0.997	39	27.1	31.1	3.36	1	0	0	0	2	1388.76			180073	157	169	Empty	true
Fed	Phosphoribosylformylglycinamidine synthase	00735fasting_3_11189,24419fed_1_79	Tityus2_.fasta	145.611,0	1	19	19	20	0.0147	0.259	ACLELGDENIICSIHDQGAGGNGNVLK	R	E	0.997	165	25	165	9.52	1	0	0	0	2	2854.35			453114	506	532	Empty	true
Fed	Phosphoribosylformylglycinamidine synthase	00735fasting_3_11189,24419fed_1_79	Tityus2_.fasta	145.611,0	1	19	19	20	0.0147	0.259	CSGNWMWAAK	K	L	0.997	50.8	25	50.8	4.62	1	0	0	0	2	1210.51			671119	755	764	Empty	true
Fed	Phosphoribosylformylglycinamidine synthase	00735fasting_3_11189,24419fed_1_79	Tityus2_.fasta	145.611,0	1	19	19	20	0.0147	0.259	EKCPVNFIGEVIGNGR	R	I	0.997	48	25.8	38.2	5.66	1	0	0	0	2	1788.91			341898	587	602	Empty	true
Fed	Phosphoribosylformylglycinamidine synthase	00735fasting_3_11189,24419fed_1_79	Tityus2_.fasta	145.611,0	1	19	19	20	0.0147	0.259	ESHRPSSFITHSGVR	K	H	0.997	77.5	25.8	76.6	3.82	1	0	0	0	2	1696.85			726667	293	307	Empty	true
Fed	Phosphoribosylformylglycinamidine synthase	00735fasting_3_11189,24419fed_1_79	Tityus2_.fasta	145.611,0	1	19	19	20	0.0147	0.259	EWVKPIMFSGGIGSIDAAFIK	R	K	0.997	95.7	25	95.7	13.2	1	0	0	0	2	2266.19			145619	424	444	Empty	true
Fed	Phosphoribosylformylglycinamidine synthase	00735fasting_3_11189,24419fed_1_79	Tityus2_.fasta	145.611,0	1	19	19	20	0.0147	0.259	FGEPVILGFAR	K	S	0.997	71.2	27.7	69.9	5.19	1	0	0	0	2	1205.67			719782	401	411	Empty	true
Fed	Phosphoribosylformylglycinamidine synthase	00735fasting_3_11189,24419fed_1_79	Tityus2_.fasta	145.611,0	1	19	19	20	0.0147	0.259	FSDNSSAILGYAVNILLPK	K	E	0.997	80.9	25	79	4.04	2	0	0	0	2	2022.09			128105	274	292	Empty	true
Fed	Phosphoribosylformylglycinamidine synthase	00735fasting_3_11189,24419fed_1_79	Tityus2_.fasta	145.611,0	1	19	19	20	0.0147	0.259	GLLDPAAGAR	K	M	0.993	45	26.8	32.2	0	1	0	0	0	2	9405212			910577	723	732	Empty	true
Fed	Phosphoribosylformylglycinamidine synthase	00735fasting_3_11189,24419fed_1_79	Tityus2_.fasta	145.611,0	1	19	19	20	0.0147	0.259	GMEDSILGVWVAHGEGR	R	F	0.997	123	25	123	6.47	1	0	0	0	2	1812.87			246565	1203	1219	Empty	true
Fed	Phosphoribosylformylglycinamidine synthase	00735fasting_3_11189,24419fed_1_79	Tityus2_.fasta	145.611,0	1	19	19	20	0.0147	0.259	GVVFPGGFSYADVLGSAR	R	G	0.997	78.5	25.7	76.4	4.23	1	0	0	0	2	1798.91			264368	1100	1117	Empty	true
Fed	Phosphoribosylformylglycinamidine synthase	00735fasting_3_11189,24419fed_1_79	Tityus2_.fasta	145.611,0	1	19	19	20	0.0147	0.259	HLAMMPHPER	R	C	0.997	52.7	26.7	43.7	4.66	1	0	0	0	2	1218.59			169034	1273	1282	Empty	true
Fed	Phosphoribosylformylglycinamidine synthase	00735fasting_3_11189,24419fed_1_79	Tityus2_.fasta	145.611,0	1	19	19	20	0.0147	0.259	IGVGGGSASSVHVQGDQK	R	A	0.997	118	26.3	118	6.48	1	0	0	0	2	1682.85			704603	464	481	Empty	true
Fed	Phosphoribosylformylglycinamidine synthase	00735fasting_3_11189,24419fed_1_79	Tityus2_.fasta	145.611,0	1	19	19	20	0.0147	0.259	IVIDGTEKKDSLIDMVMSTQQFSNSNNVIK	R	F	0.997	0	0	0	22.4	1	0	0	0	2	3354.69			182719	244	273	Empty	true
Fed	Phosphoribosylformylglycinamidine synthase	00735fasting_3_11189,24419fed_1_79	Tityus2_.fasta	145.611,0	1	19	19	20	0.0147	0.259	LGGSALAQCFNQLGDNTADLDSPELLR	R	T	0.997	103	25	103	15.2	1	0	0	0	2	2875.39			185118	854	880	Empty	true
Fed	Phosphoribosylformylglycinamidine synthase	00735fasting_3_11189,24419fed_1_79	Tityus2_.fasta	145.611,0	1	19	19	20	0.0147	0.259	LNEERHPVDLELEHVLASMPR	K	K	0.968	14.7	25	14.7	1.17	1	0	0	0	2	2484.27			239878	609	629	Empty	true
Fed	Phosphoribosylformylglycinamidine synthase	00735fasting_3_11189,24419fed_1_79	Tityus2_.fasta	145.611,0	1	19	19	20	0.0147	0.259	MSVAEAVTNLMFAPISSLKDAK	R	C	0.997	148	25	148	9.04	1	0	0	0	2	2323.2			190503	733	754	Empty	true
Fed	Phosphoribosylformylglycinamidine synthase	00735fasting_3_11189,24419fed_1_79	Tityus2_.fasta	145.611,0	1	19	19	20	0.0147	0.259	NLTNDQLNSLSWILSR	K	G	0.997	129	25.4	129	8.39	1	0	0	0	2	1873.98			148204	52	67	Empty	true
Fed	Phosphoribosylformylglycinamidine synthase	00735fasting_3_11189,24419fed_1_79	Tityus2_.fasta	145.611,0	1	19	19	20	0.0147	0.259	NPTTVECFDLAQSNSEHSR	R	H	0.997	192	25	191	22	1	0	0	0	2	2191.97			668112	218	236	Empty	true
Fed	Phosphoribosylformylglycinamidine synthase	00735fasting_3_11189,24419fed_1_79	Tityus2_.fasta	145.611,0	1	19	19	20	0.0147	0.259	TGFEVTQNLITDNK	R	L	0.997	99.1	26.8	98.2	5.33	1	0	0	0	2	1579.8			672653	881	894	Empty	true
Fed	Dipeptidyl peptidase 4	00565fasting_2_11024	Tityus2_.fasta	68.973,7	1	1	1	4	0.00293	0.0183	KNYIYAWIDGR	R	G	0.997	21.6	26.5	7.76	1.15	4	0	0	0	2	1398.72			20478700	389	399	Empty	true
Fed	unknown protein	05978fasting_2_363	Tityus2_.fasta	75.890,9	1	6	6	6	0.0044	0.111	GAQILISDGNTR	K	F	0.997	51.5	27.9	25.9	3.46	1	0	0	0	2	1244.66			743691	292	303	Empty	true
Fed	unknown protein	05978fasting_2_363	Tityus2_.fasta	75.890,9	1	6	6	6	0.0044	0.111	GNIPNFPIVSDTSK	K	M	0.997	54.4	27	51.7	4.36	1	0	0	0	2	1488.77			285194	416	429	Empty	true
Fed	unknown protein	05978fasting_2_363	Tityus2_.fasta	75.890,9	1	6	6	6	0.0044	0.111	ISLIPADGK	R	I	0.979	36.5	26.4	14.8	0	1	0	0	0	2	9135355			488527	332	340	Empty	true
Fed	unknown protein	05978fasting_2_363	Tityus2_.fasta	75.890,9	1	6	6	6	0.0044	0.111	SGFLLTTK	K	N	0.969	60.6	27.6	52.1	0	1	0	0	0	2	8664983			782267	533	540	Empty	true
Fed	unknown protein	05978fasting_2_363	Tityus2_.fasta	75.890,9	1	6	6	6	0.0044	0.111	SHSLGGYFQNEGK	R	I	0.997	36.1	26	36.1	3.21	1	0	0	0	2	1423.66			859353	349	361	Empty	true
Fed	unknown protein	05978fasting_2_363	Tityus2_.fasta	75.890,9	1	6	6	6	0.0044	0.111	SLVLDITKLEDIPELYLTAK	K	S	0.997	132	25	132	10.7	1	0	0	0	2	2274.28			626675	513	532	Empty	true
Fed	Tumor necrosis factor alpha-induced protein 8-like protein	16039fasting_1_5834	Tityus2_.fasta	21.541,8	0.978	1	1	1	0.000734	0.0479	SLLKDLVVR	R	H	0.997	60	25.7	45.3	1.15	1	0	0	0	2	1042.66			803622	127	135	Empty	true
Fed	Apical endosomal glycoprotein	13927fasting_1_2788	Tityus2_.fasta	169.557,3	1	3	3	3	0.0022	0.0291	LDHTTGTDYGYYLQAK	K	S	0.997	56.3	25	56.3	2.6	1	0	0	0	2	1845.87			594793	725	740	Empty	true
Fed	Apical endosomal glycoprotein	13927fasting_1_2788	Tityus2_.fasta	169.557,3	1	3	3	3	0.0022	0.0291	VQGSTATPFTGPSEDHTKK	R	L	0.997	20.1	25.3	20.1	0.523	1	0	0	0	2	1987.97			83.906,3	47	65	Empty	true
Fed	Apical endosomal glycoprotein	13927fasting_1_2788	Tityus2_.fasta	169.557,3	1	3	3	3	0.0022	0.0291	VQNFELVK	R	I	0.997	46.5	28.6	31.8	3.77	1	0	0	0	2	9765462			212201	881	888	Empty	true
Fed	Hemocyanin AA6 chain	10337fasting_2_29538,29086fed_2_1376	Tityus2_.fasta	71.794,0	1	10	10	10	0.00734	0.274	DLSDVDVQDMVR	K	W	0.997	62.6	25.8	54.5	2.72	1	0	0	0	2	1391.65			387980	258	269	Empty	true
Fed	Hemocyanin AA6 chain	10337fasting_2_29538,29086fed_2_1376	Tityus2_.fasta	71.794,0	1	10	10	10	0.00734	0.274	EKLPVSERDDRLK	R	G	0.997	0	0	0	3	1	0	0	0	2	1584.87			379184	23	35	Empty	true
Fed	Hemocyanin AA6 chain	10337fasting_2_29538,29086fed_2_1376	Tityus2_.fasta	71.794,0	1	10	10	10	0.00734	0.274	FIPTETINLANK	R	E	0.997	44.2	26.1	34.7	1.92	1	0	0	0	2	1360.75			1132940	119	130	Empty	true
Fed	Hemocyanin AA6 chain	10337fasting_2_29538,29086fed_2_1376	Tityus2_.fasta	71.794,0	1	10	10	10	0.00734	0.274	FQENPGVMSDTSTSLRDPIFYR	R	W	0.997	97.8	25	94.8	9.66	1	0	0	0	2	2560.21			1113910	339	360	Empty	true
Fed	Hemocyanin AA6 chain	10337fasting_2_29538,29086fed_2_1376	Tityus2_.fasta	71.794,0	1	10	10	10	0.00734	0.274	GTLFSCFHSR	R	H	0.997	49.9	26.2	49.4	1.85	1	0	0	0	2	1211.56			280330	43	52	Empty	true
Fed	Hemocyanin AA6 chain	10337fasting_2_29538,29086fed_2_1376	Tityus2_.fasta	71.794,0	1	10	10	10	0.00734	0.274	ILDAINMHYIVDKDNNK	R	I	0.997	33.7	25	33.7	2.32	1	0	0	0	2	2016.02			636858	274	290	Empty	true
Fed	Hemocyanin AA6 chain	10337fasting_2_29538,29086fed_2_1376	Tityus2_.fasta	71.794,0	1	10	10	10	0.00734	0.274	IPLDVEHGTDILGDIIESSDESK	K	N	0.997	94.4	25	93.3	14	1	0	0	0	2	2482.22			235484	291	313	Empty	true
Fed	Hemocyanin AA6 chain	10337fasting_2_29538,29086fed_2_1376	Tityus2_.fasta	71.794,0	1	10	10	10	0.00734	0.274	LFIELDKFYATLAAGK	R	T	0.997	142	25	132	7.38	1	0	0	0	2	1799.99			277045	480	495	Empty	true
Fed	Hemocyanin AA6 chain	10337fasting_2_29538,29086fed_2_1376	Tityus2_.fasta	71.794,0	1	10	10	10	0.00734	0.274	MIPFHNFEEPLEGYAPHLTSLVSGLQYASRPEGYSIKDLSDVDVQDMVR	R	W	0.997	88.9	25	88.9	16.5	1	0	0	0	2	5550.7			179721	221	269	Empty	true
Fed	Hemocyanin AA6 chain	10337fasting_2_29538,29086fed_2_1376	Tityus2_.fasta	71.794,0	1	10	10	10	0.00734	0.274	TPNVVTTLTK	K	E	0.997	73.5	27.8	71.5	5.72	1	0	0	0	2	1073.62			457570	400	409	Empty	true
Fed	unknown protein	23775fed_2_268	Tityus2_.fasta	31.465,8	1	2	2	2	0.00147	0.0787	IVYMGNVDTVR	R	S	0.997	60.6	27.5	57.6	1.66	1	0	0	0	2	1266.65			852709	160	170	Empty	true
Fed	unknown protein	23775fed_2_268	Tityus2_.fasta	31.465,8	1	2	2	2	0.00147	0.0787	YIYGPTALFK	R	S	0.997	44.1	28	39	1.12	1	0	0	0	2	1172.64			555112	138	147	Empty	true
Fed	MAM and LDL-receptor class A domain-containing protein C10orf112	19500fed_1_12131	Tityus2_.fasta	73.429,4	1	5	5	5	0.00367	0.072	DGWFAVLSGK	K	K	0.997	59.2	28.6	47.8	2.52	1	0	0	0	2	1079.55			337359	517	526	Empty	true
Fed	MAM and LDL-receptor class A domain-containing protein C10orf112	19500fed_1_12131	Tityus2_.fasta	73.429,4	1	5	5	5	0.00367	0.072	FLYFFGER	K	N	0.997	44.9	28.6	37.7	1.66	1	0	0	0	2	1078.54			617609	297	304	Empty	true
Fed	MAM and LDL-receptor class A domain-containing protein C10orf112	19500fed_1_12131	Tityus2_.fasta	73.429,4	1	5	5	5	0.00367	0.072	MFLEIKR	K	N	0.988	41.8	26.4	33.3	0.721	1	0	0	0	2	9365336			409325	581	587	Empty	true
Fed	MAM and LDL-receptor class A domain-containing protein C10orf112	19500fed_1_12131	Tityus2_.fasta	73.429,4	1	5	5	5	0.00367	0.072	TTAPSYDSLK	K	K	0.997	51.5	28.1	45.3	0.585	1	0	0	0	2	1082.54			593738	505	514	Empty	true
Fed	MAM and LDL-receptor class A domain-containing protein C10orf112	19500fed_1_12131	Tityus2_.fasta	73.429,4	1	5	5	5	0.00367	0.072	WTLQSGFSQLK	K	K	0.997	69.5	27.6	64.6	3	1	0	0	0	2	1294.68			319160	271	281	Empty	true
Fed	Hephaestin-like protein 1	08579fasting_1_25440	Tityus2_.fasta	118.546,8	1	2	2	2	0.00147	0.0489	FSIQPTEELKQDEGFQQSNLR	K	Y	0.997	96.4	25	94.8	17.8	1	0	0	0	2	2494.22			614807	242	262	Empty	true
Fed	Hephaestin-like protein 1	08579fasting_1_25440	Tityus2_.fasta	118.546,8	1	2	2	2	0.00147	0.0489	RRSDVLELTPGIFETVEMVSNNPGSWLLHC	K	H	0.967	0	0	0	1.09	1	0	0	0	1	3456.7			366741	995	1024	Empty	true
Fed	unknown protein	28337fed_3_28112,28338fed_3_28114	Tityus2_.fasta	5.796,5	1	5	7	7	0.00514	0.725	CKNPAESFIVELDK	K	C	0.997	64.4	26.5	64.4	10.2	2	0	0	0	2	1649.82			646092	17	30	Empty	true
Fed	unknown protein	28337fed_3_28112,28338fed_3_28114	Tityus2_.fasta	5.796,5	1	5	7	7	0.00514	0.725	CKNPAESFIVELDKCAIPCEPK	K	F	0.997	153	38.3	16.9	12.4	2	0	0	0	2	2588.22			1909170	17	38	Empty	true
Fed	unknown protein	28337fed_3_28112,28338fed_3_28114	Tityus2_.fasta	5.796,5	1	5	7	7	0.00514	0.725	DKCAIPCEPK	L	F	0.987	15.8	35	-1.3	1.51	1	0	0	0	1	1217.57			661351	29	38	Empty	true
Fed	unknown protein	28337fed_3_28112,28338fed_3_28114	Tityus2_.fasta	5.796,5	1	5	7	7	0.00514	0.725	GGESCEKVENNDVCK	M	C	0.991	49.5	33.5	0	0	1	0	0	0	1	1738.74			24.142,1	2	16	Empty	true
Fed	unknown protein	28337fed_3_28112,28338fed_3_28114	Tityus2_.fasta	5.796,5	1	5	7	7	0.00514	0.725	NPAESFIVELDKCAIPCEPK	K	F	0.997	150	25	150	13.6	1	0	0	0	2	2317.12			595390	19	38	Empty	true
Fed	Spectrin alpha chain	24329fed_3_722	Tityus2_.fasta	279.318,6	1	3	3	3	0.0022	0.0149	AYQLVREAAELTQWVK	K	D	0.992	17.5	25	12.1	1.11	1	0	0	0	2	1905.02			146657	1074	1089	Empty	true
Fed	Spectrin alpha chain	24329fed_3_722	Tityus2_.fasta	279.318,6	1	3	3	3	0.0022	0.0149	QLTAKANAR	T	K	0.971	0	0	0	0.469	1	0	0	0	1	9555320			693305	1269	1277	Empty	true
Fed	Spectrin alpha chain	24329fed_3_722	Tityus2_.fasta	279.318,6	1	3	3	3	0.0022	0.0149	QSEINEEWTQLTAKANARKE	K	K	0.98	0	0	0	1.25	1	0	0	0	1	2346.17			1518080	1260	1279	Empty	true
Fed	MAM and LDL-receptor class A domain-containing protein C10orf112	23622fed_2_152	Tityus2_.fasta	580.276,3	1	25	25	25	0.0183	0.0676	DGTLDYPLWSIK	K	G	0.997	48.1	27	48.1	3.01	1	0	0	0	2	1407.72			232006	768	779	Empty	true
Fed	MAM and LDL-receptor class A domain-containing protein C10orf112	23622fed_2_152	Tityus2_.fasta	580.276,3	1	25	25	25	0.0183	0.0676	DTNDNIFTWTITK	R	A	0.997	73.3	26.4	73.3	6.12	1	0	0	0	2	1568.76			94.875,2	4004	4016	Empty	true
Fed	MAM and LDL-receptor class A domain-containing protein C10orf112	23622fed_2_152	Tityus2_.fasta	580.276,3	1	25	25	25	0.0183	0.0676	EVVFEAVIKQENSGDIALDDVLIKDGK	H	C	0.966	0.88	38	-2.38	0.959	1	0	0	0	1	2944.55			273284	800	826	Empty	true
Fed	MAM and LDL-receptor class A domain-containing protein C10orf112	23622fed_2_152	Tityus2_.fasta	580.276,3	1	25	25	25	0.0183	0.0676	FLNYWIK	K	S	0.988	22.8	27.5	13.9	0.495	1	0	0	0	2	9835349			429882	2273	2279	Empty	true
Fed	MAM and LDL-receptor class A domain-containing protein C10orf112	23622fed_2_152	Tityus2_.fasta	580.276,3	1	25	25	25	0.0183	0.0676	FWYFLQGK	R	H	0.997	19.6	28.8	15.1	1.14	1	0	0	0	2	1088.56			262625	239	246	Empty	true
Fed	MAM and LDL-receptor class A domain-containing protein C10orf112	23622fed_2_152	Tityus2_.fasta	580.276,3	1	25	25	25	0.0183	0.0676	GHYIALDHTSKYHR	R	S	0.997	89.1	25.7	89.1	5.55	1	0	0	0	2	1697.85			147709	2214	2227	Empty	true
Fed	MAM and LDL-receptor class A domain-containing protein C10orf112	23622fed_2_152	Tityus2_.fasta	580.276,3	1	25	25	25	0.0183	0.0676	GIAVDDIVLSK	R	Y	0.997	70.7	27	58	0	1	0	0	0	2	1129.65			861622	2133	2143	Empty	true
Fed	MAM and LDL-receptor class A domain-containing protein C10orf112	23622fed_2_152	Tityus2_.fasta	580.276,3	1	25	25	25	0.0183	0.0676	GSIGDYWIR	K	S	0.997	71.2	28.5	66.6	0	1	0	0	0	2	1066.53			444134	3866	3874	Empty	true
Fed	MAM and LDL-receptor class A domain-containing protein C10orf112	23622fed_2_152	Tityus2_.fasta	580.276,3	1	25	25	25	0.0183	0.0676	GYYIYVK	K	A	0.988	25.5	30	25.5	3.02	1	0	0	0	2	9054767			694593	878	884	Empty	true
Fed	MAM and LDL-receptor class A domain-containing protein C10orf112	23622fed_2_152	Tityus2_.fasta	580.276,3	1	25	25	25	0.0183	0.0676	HSDILEVLK	K	L	0.997	81.9	26.3	70.2	6.09	1	0	0	0	2	1053.59			476214	247	255	Empty	true
Fed	MAM and LDL-receptor class A domain-containing protein C10orf112	23622fed_2_152	Tityus2_.fasta	580.276,3	1	25	25	25	0.0183	0.0676	IALISSTTFLPTFAK	R	D	0.997	46.1	25	42.8	2.92	1	0	0	0	2	1609.92			238428	3387	3401	Empty	true
Fed	MAM and LDL-receptor class A domain-containing protein C10orf112	23622fed_2_152	Tityus2_.fasta	580.276,3	1	25	25	25	0.0183	0.0676	KEPFSLSFSR	R	V	0.997	54.2	27.1	32.6	2.47	1	0	0	0	2	1197.63			328895	3673	3682	Empty	true
Fed	MAM and LDL-receptor class A domain-containing protein C10orf112	23622fed_2_152	Tityus2_.fasta	580.276,3	1	25	25	25	0.0183	0.0676	LLSPFLTSK	R	N	0.997	58.2	25.7	42.9	0.495	1	0	0	0	2	1005.6			633736	2554	2562	Empty	true
Fed	MAM and LDL-receptor class A domain-containing protein C10orf112	23622fed_2_152	Tityus2_.fasta	580.276,3	1	25	25	25	0.0183	0.0676	LVTDMPLAYK	K	L	0.997	65.3	27.5	50.2	2.89	1	0	0	0	2	1150.62			758861	451	460	Empty	true
Fed	MAM and LDL-receptor class A domain-containing protein C10orf112	23622fed_2_152	Tityus2_.fasta	580.276,3	1	25	25	25	0.0183	0.0676	LYIVGEK	K	D	0.988	20.6	27.6	12.8	1.55	1	0	0	0	2	8214768			175269	461	467	Empty	true
Fed	MAM and LDL-receptor class A domain-containing protein C10orf112	23622fed_2_152	Tityus2_.fasta	580.276,3	1	25	25	25	0.0183	0.0676	NLVGILESEYFELTNDR	R	C	0.997	123	25	123	8.62	1	0	0	0	2	2012			163261	904	920	Empty	true
Fed	MAM and LDL-receptor class A domain-containing protein C10orf112	23622fed_2_152	Tityus2_.fasta	580.276,3	1	25	25	25	0.0183	0.0676	SIFDDGPK	R	S	0.969	54	29.8	46.2	0	1	0	0	0	2	8784256			525495	45	52	Empty	true
Fed	MAM and LDL-receptor class A domain-containing protein C10orf112	23622fed_2_152	Tityus2_.fasta	580.276,3	1	25	25	25	0.0183	0.0676	SNEFECGDKTCVPR	K	I	0.997	37.3	25	37.3	2.09	1	0	0	0	2	1698.72			183594	4898	4911	Empty	true
Fed	MAM and LDL-receptor class A domain-containing protein C10orf112	23622fed_2_152	Tityus2_.fasta	580.276,3	1	25	25	25	0.0183	0.0676	SPDYISWEWLDGSTSNPQTGPEFDHTFGTK	K	D	0.997	204	25	204	18.5	1	0	0	0	2	3399.51			376473	679	708	Empty	true
Fed	MAM and LDL-receptor class A domain-containing protein C10orf112	23622fed_2_152	Tityus2_.fasta	580.276,3	1	25	25	25	0.0183	0.0676	STGESPFNGEKPETDHTTNTVTGK	R	F	0.997	80.7	25	80.7	9.7	1	0	0	0	2	2534.16			989326	1837	1860	Empty	true
Fed	MAM and LDL-receptor class A domain-containing protein C10orf112	23622fed_2_152	Tityus2_.fasta	580.276,3	1	25	25	25	0.0183	0.0676	TLPSPFSVDASWLR	R	V	0.997	90.4	26.7	87.8	4.48	1	0	0	0	2	1575.82			495757	337	350	Empty	true
Fed	MAM and LDL-receptor class A domain-containing protein C10orf112	23622fed_2_152	Tityus2_.fasta	580.276,3	1	25	25	25	0.0183	0.0676	TTISLWK	K	E	0.988	36.4	29.4	20	1.02	1	0	0	0	2	8484877			595342	262	268	Empty	true
Fed	MAM and LDL-receptor class A domain-containing protein C10orf112	23622fed_2_152	Tityus2_.fasta	580.276,3	1	25	25	25	0.0183	0.0676	WTEFVSKIPENPNVASVQI	K	T	0.954	9.43	37.7	9.43	0.585	1	0	0	0	1	2158.12			1118640	1601	1619	Empty	true
Fed	MAM and LDL-receptor class A domain-containing protein C10orf112	23622fed_2_152	Tityus2_.fasta	580.276,3	1	25	25	25	0.0183	0.0676	YIFQAVMGK	R	S	0.997	55.7	28	49.7	2.31	1	0	0	0	2	1056.55			806880	2461	2469	Empty	true
Fed	MAM and LDL-receptor class A domain-containing protein C10orf112	23622fed_2_152	Tityus2_.fasta	580.276,3	1	25	25	25	0.0183	0.0676	YSNSIVPIWSEKGDEGDEWHAAQVSVTPTSSEPFR	K	Y	0.997	107	25	107	12.8	1	0	0	0	2	3905.83			431581	2426	2460	Empty	true
Fed	Hemocyanin F chain	02750fasting_2_13777,19977fed_1_12930	Tityus2_.fasta	72.730,8	1	12	12	13	0.00954	0.275	DFNDFIHLCEQAR	K	D	0.997	58.2	25	57.9	1.72	1	0	0	0	2	1664.75			431088	69	81	Empty	true
Fed	Hemocyanin F chain	02750fasting_2_13777,19977fed_1_12930	Tityus2_.fasta	72.730,8	1	12	12	13	0.00954	0.275	DLKEVAVQDMER	R	W	0.997	84.3	27	74.7	4.85	2	0	0	0	2	1432.71			1500200	258	269	Empty	true
Fed	Hemocyanin F chain	02750fasting_2_13777,19977fed_1_12930	Tityus2_.fasta	72.730,8	1	12	12	13	0.00954	0.275	FIPAETINAALK	R	A	0.997	49.4	26.2	39.8	1.62	1	0	0	0	2	1287.73			1357350	119	130	Empty	true
Fed	Hemocyanin F chain	02750fasting_2_13777,19977fed_1_12930	Tityus2_.fasta	72.730,8	1	12	12	13	0.00954	0.275	GVTVPPIQEIFPDR	R	F	0.997	69.2	25.6	66.8	1.11	1	0	0	0	2	1567.85			375901	105	118	Empty	true	10353fasting_2_29561
Fed	Hemocyanin F chain	02750fasting_2_13777,19977fed_1_12930	Tityus2_.fasta	72.730,8	1	12	12	13	0.00954	0.275	GVTVPPIQEIFPDRFIPAETINAALK	R	A	0.997	44.2	25	30.2	3.29	1	0	0	0	2	2836.56			1642470	105	130	Empty	true
Fed	Hemocyanin F chain	02750fasting_2_13777,19977fed_1_12930	Tityus2_.fasta	72.730,8	1	12	12	13	0.00954	0.275	IIPLFEHLTSLTR	R	K	0.997	68.6	25	63.7	1.8	1	0	0	0	2	1539.89			508512	10	22	Empty	true
Fed	Hemocyanin F chain	02750fasting_2_13777,19977fed_1_12930	Tityus2_.fasta	72.730,8	1	12	12	13	0.00954	0.275	ILDSIHLGTIIDDEGNEIPLDAQHGIDILGDLMESSEESKNR	R	D	0.997	105	25	105	16.5	1	0	0	0	2	4602.25			1077040	274	315	Empty	true
Fed	Hemocyanin F chain	02750fasting_2_13777,19977fed_1_12930	Tityus2_.fasta	72.730,8	1	12	12	13	0.00954	0.275	KSDESSVTISHVPTVEELKK	R	G	0.997	0	0	0	13.5	1	0	0	0	2	2213.17			1147350	499	518	Empty	true
Fed	Hemocyanin F chain	02750fasting_2_13777,19977fed_1_12930	Tityus2_.fasta	72.730,8	1	12	12	13	0.00954	0.275	NMSYTDVIIQFKEHVEQ	K	-	0.988	18.8	38.2	0	2.74	1	0	0	0	2	2081			179417	613	629	Empty	true
Fed	Hemocyanin F chain	02750fasting_2_13777,19977fed_1_12930	Tityus2_.fasta	72.730,8	1	12	12	13	0.00954	0.275	TGPDSIYVEIK	R	E	0.997	99.6	28.1	87.8	6	1	0	0	0	2	1221.64			1254280	136	146	Empty	true
Fed	Hemocyanin F chain	02750fasting_2_13777,19977fed_1_12930	Tityus2_.fasta	72.730,8	1	12	12	13	0.00954	0.275	TIADFVTK	R	N	0.947	31.6	28.4	22.6	0	1	0	0	0	2	8944932			827675	605	612	Empty	true
Fed	Hemocyanin F chain	02750fasting_2_13777,19977fed_1_12930	Tityus2_.fasta	72.730,8	1	12	12	13	0.00954	0.275	YDCDRLSVGLR	R	R	0.997	57.6	27.1	53.8	3.02	1	0	0	0	2	1353.66			414782	209	219	Empty	true
Fed	Hemocyanin AA6 chain	04165fasting_1_16742,27819fed_3_26963	Tityus2_.fasta	71.668,1	1	11	11	13	0.00954	0.322	DLKDVDVQDMER	R	W	0.997	73.2	25.7	63.5	3.37	2	0	0	0	2	1462.68			987352	257	268	Empty	true
Fed	Hemocyanin AA6 chain	04165fasting_1_16742,27819fed_3_26963	Tityus2_.fasta	71.668,1	1	11	11	13	0.00954	0.322	FVDNIFQDYKATLHPYTR	R	E	0.997	128	25	128	9.62	1	0	0	0	2	2228.11			514512	363	380	Empty	true
Fed	Hemocyanin AA6 chain	04165fasting_1_16742,27819fed_3_26963	Tityus2_.fasta	71.668,1	1	11	11	13	0.00954	0.322	FVPAETVNLAIK	R	E	0.997	71.5	25.9	66.8	3.37	1	0	0	0	2	1301.75			1081210	119	130	Empty	true
Fed	Hemocyanin AA6 chain	04165fasting_1_16742,27819fed_3_26963	Tityus2_.fasta	71.668,1	1	11	11	13	0.00954	0.322	GVTVPPIQEVFPDRFVPAETVNLAIK	K	E	0.997	37.3	25	15.9	1.21	1	0	0	0	2	2836.56			251181	105	130	Empty	true
Fed	Hemocyanin AA6 chain	04165fasting_1_16742,27819fed_3_26963	Tityus2_.fasta	71.668,1	1	11	11	13	0.00954	0.322	IFLGPKFDELGNVLDVNEQRR	R	L	0.997	0	0	0	8.66	1	0	0	0	2	2459.3			258012	458	478	Empty	true
Fed	Hemocyanin AA6 chain	04165fasting_1_16742,27819fed_3_26963	Tityus2_.fasta	71.668,1	1	11	11	13	0.00954	0.322	ILDAIHLGHIHTSEDEEIALDEAHGADILGDIIESSAESR	R	N	0.997	69.6	25	69.6	7.48	1	0	0	0	2	4292.1			161537	273	312	Empty	true
Fed	Hemocyanin AA6 chain	04165fasting_1_16742,27819fed_3_26963	Tityus2_.fasta	71.668,1	1	11	11	13	0.00954	0.322	ILSLFEHLTSLTEK	R	Q	0.997	101	25	84.3	4.96	1	0	0	0	2	1630.91			304584	10	23	Empty	true
Fed	Hemocyanin AA6 chain	04165fasting_1_16742,27819fed_3_26963	Tityus2_.fasta	71.668,1	1	11	11	13	0.00954	0.322	KNNTIHTFIKDEELELSHGIR	K	F	0.997	0	0	0	16.1	1	0	0	0	2	2494.31			236985	399	419	Empty	true
Fed	Hemocyanin AA6 chain	04165fasting_1_16742,27819fed_3_26963	Tityus2_.fasta	71.668,1	1	11	11	13	0.00954	0.322	LSHGIRFASEHSVKVK	E	Y	0.964	3.7	35.9	0.16	1.26	2	0	0	0	1	1795			509761	414	429	Empty	true
Fed	Hemocyanin AA6 chain	04165fasting_1_16742,27819fed_3_26963	Tityus2_.fasta	71.668,1	1	11	11	13	0.00954	0.322	NLQEFLTPNIHVTDIDIKFDG	R	-	0.997	94.1	25	94.1	10.1	1	0	0	0	2	2429.24			198711	605	625	Empty	true
Fed	Hemocyanin AA6 chain	04165fasting_1_16742,27819fed_3_26963	Tityus2_.fasta	71.668,1	1	11	11	13	0.00954	0.322	NQEFYGSLHNWGHVLMAR	R	I	0.997	94.4	25	94.4	6.2	1	0	0	0	2	2159.02			308533	313	330	Empty	true
Fed	Leukocyte elastase inhibitor	05846fasting_2_272	Tityus2_.fasta	42.526,4	1	2	2	2	0.00147	0.073	ELTNDIFKDFFTHFR	R	K	0.997	106	25.4	106	2.7	1	0	0	0	2	1929.95			26.627,8	241	255	Empty	true
Fed	Leukocyte elastase inhibitor	05846fasting_2_272	Tityus2_.fasta	42.526,4	1	2	2	2	0.00147	0.073	QLKEDLQIFGFK	R	T	0.997	70.4	25.2	58.4	2.21	1	0	0	0	2	1465.81			176524	273	284	Empty	true
Fed	Leukocyte elastase inhibitor	04196fasting_3_16784	Tityus2_.fasta	50.481,1	1	3	3	3	0.0022	0.126	LFGNNADLSGITGK	D	D	0.986	23.1	38.6	4.06	0.444	1	0	0	0	1	1406.73			1591010	359	372	Empty	true
Fed	Leukocyte elastase inhibitor	04196fasting_3_16784	Tityus2_.fasta	50.481,1	1	3	3	3	0.0022	0.126	LKNEITDNIITTFLKELDVTR	R	V	0.997	0	0	0	10.4	1	0	0	0	2	2476.37			151764	311	331	Empty	true
Fed	Leukocyte elastase inhibitor	04196fasting_3_16784	Tityus2_.fasta	50.481,1	1	3	3	3	0.0022	0.126	VLQLPYKGDDISMLLVLPYER	K	D	0.997	37.4	25	37.4	5.1	1	0	0	0	2	2462.34			79.130,0	285	305	Empty	true
Fed	Prominin-1	24092fed_3_519	Tityus2_.fasta	97.653,9	1	4	4	4	0.00293	0.0569	EKPEYELELTQR	K	N	0.997	53.7	27.1	43.7	2.35	1	0	0	0	2	1534.77			267443	816	827	Empty	true
Fed	Prominin-1	24092fed_3_519	Tityus2_.fasta	97.653,9	1	4	4	4	0.00293	0.0569	IGEILKDIGNIEK	K	S	0.997	95.7	25	80	4.39	1	0	0	0	2	1441.83			387697	654	666	Empty	true
Fed	Prominin-1	24092fed_3_519	Tityus2_.fasta	97.653,9	1	4	4	4	0.00293	0.0569	LSNINAITK	K	Q	0.997	68.4	28.7	45.9	1.77	1	0	0	0	2	9735677			285837	404	412	Empty	true
Fed	Prominin-1	24092fed_3_519	Tityus2_.fasta	97.653,9	1	4	4	4	0.00293	0.0569	QINEQTKPLQNDMK	K	S	0.997	106	26.3	96	6.04	1	0	0	0	2	1686.85			511777	362	375	Empty	true
Fed	Calcium-transporting ATPase sarcoplasmic-endoplasmic reticulum type	26540fed_2_24694	Tityus2_.fasta	109.900,1	1	3	3	3	0.0022	0.048	EFTLEFSR	K	D	0.997	55.8	26.8	40.8	1.96	1	0	0	0	2	1028.5			458956	483	490	Empty	true	02437fasting_3_13258
Fed	Calcium-transporting ATPase sarcoplasmic-endoplasmic reticulum type	26540fed_2_24694	Tityus2_.fasta	109.900,1	1	3	3	3	0.0022	0.048	PVLLLDEALKFIARKFIDVAPVQKK	L	-	0.968	0	0	0	1.89	1	0	0	0	1	2851.72			324204	977	1001	Empty	true
Fed	Calcium-transporting ATPase sarcoplasmic-endoplasmic reticulum type	26540fed_2_24694	Tityus2_.fasta	109.900,1	1	3	3	3	0.0022	0.048	VGEATETALIVLAEK	K	M	0.997	127	25	125	7.03	1	0	0	0	2	1543.86			200485	438	452	Empty	true
Fed	Hemocyanin B chain	10939fasting_3_31133	Tityus2_.fasta	73.668,1	1	7	7	7	0.00473	0.172	DFVNEGLYIYAVAVAILHR	R	K	0.997	26.6	25	26.6	3.21	1	0	0	0	2	2163.16			15.636,1	85	103	Empty	true
Fed	Hemocyanin B chain	10939fasting_3_31133	Tityus2_.fasta	73.668,1	1	7	7	7	0.00473	0.172	FIDDMFQEYKK	R	T	0.997	92.2	26.6	89.3	6.34	1	0	0	0	2	1463.69			532173	367	377	Empty	true
Fed	Hemocyanin B chain	10939fasting_3_31133	Tityus2_.fasta	73.668,1	1	7	7	7	0.00473	0.172	FVPIETLLK	K	A	0.997	49.2	25	41.3	2.26	1	0	0	0	2	1059.64			615819	122	130	Empty	true
Fed	Hemocyanin B chain	10939fasting_3_31133	Tityus2_.fasta	73.668,1	1	7	7	7	0.00473	0.172	GMPFHLFVILTDFTQDFVPDHSHR	K	S	0.997	129	25	129	16.3	1	0	0	0	2	2856.39			113044	551	574	Empty	true
Fed	Hemocyanin B chain	10939fasting_3_31133	Tityus2_.fasta	73.668,1	1	7	7	7	0.00473	0.172	LEGLGILGR	R	G	0.997	53.8	25.6	39.3	0.959	1	0	0	0	2	9275624			375909	37	45	Empty	true
Fed	Hemocyanin B chain	10939fasting_3_31133	Tityus2_.fasta	73.668,1	1	7	7	7	0.00473	0.172	LLPLFQYVPLLTK	R	E	0.997	78.9	25	77.9	4.15	1	0	0	0	2	1544.95			196849	12	24	Empty	true
Fed	Hemocyanin B chain	10939fasting_3_31133	Tityus2_.fasta	73.668,1	1	7	7	7	0.00473	0.172	LMVELDKFSTELEPGVNTIEHSSR	R	D	0.997	182	25	182	12.8	1	0	0	0	2	2731.36			545283	484	507	Empty	true
Fed	unknown protein	24180fed_3_595	Tityus2_.fasta	38.849,0	1	1	1	1	0.000675	0.0284	TVSTGDMLSR	K	T	0.997	63.8	28.3	60.2	0.585	1	0	0	0	2	1066.52			1171120	215	224	Empty	true
Fed	Cofilin-actin-depolymerizing factor homolog	07702fasting_1_24238	Tityus2_.fasta	16.976,6	1	6	7	7	0.00473	0.493	FIIYHIKDEK	R	V	0.997	59.4	26.9	45.2	1.96	1	0	0	0	2	1305.72			1165190	26	35	Empty	true
Fed	Cofilin-actin-depolymerizing factor homolog	07702fasting_1_24238	Tityus2_.fasta	16.976,6	1	6	7	7	0.00473	0.493	LVLMTWCPEGSK	R	I	0.997	68.4	27	67.2	2.14	1	0	0	0	2	1420.7			403952	90	101	Empty	true
Fed	Cofilin-actin-depolymerizing factor homolog	07702fasting_1_24238	Tityus2_.fasta	16.976,6	1	6	7	7	0.00473	0.493	MLYSSSYDALKK	K	A	0.997	57.2	27	0	2.82	2	0	0	0	2	1421.7			1832190	106	117	Empty	true	25470fed_2_22014
Fed	Cofilin-actin-depolymerizing factor homolog	07702fasting_1_24238	Tityus2_.fasta	16.976,6	1	6	7	7	0.00473	0.493	YCVFDFPAPMPVEGSHEK	R	T	0.997	67.5	25	67.5	7.68	1	0	0	0	2	2109.94			400352	65	82	Empty	true
Fed	Cofilin-actin-depolymerizing factor homolog	07702fasting_1_24238	Tityus2_.fasta	16.976,6	1	6	7	7	0.00473	0.493	YVQACDFEEISQEAIEDAFR	K	K	0.997	138	25	138	14	1	0	0	0	2	2420.07			144246	125	144	Empty	true
Fed	Cofilin-actin-depolymerizing factor homolog	07702fasting_1_24238	Tityus2_.fasta	16.976,6	1	6	7	7	0.00473	0.493	YVQACDFEEISQEAIEDAFRK	K	G	0.997	158	25	158	12.9	1	0	0	0	2	2548.17			485904	125	145	Empty	true
Fed	Zinc finger CCCH-type with G patch domain-containing protein	02385fasting_2_13173	Tityus2_.fasta	59.777,7	0.917	1	1	1	0.000675	0.0135	KDLLTLK	R	S	0.988	69.8	29.5	27	1.96	1	0	0	0	2	8305348			3406420	44	50	Empty	true
Fed	Catalase	06540fasting_3_79	Tityus2_.fasta	62.484,5	1	1	1	1	0.000675	0.0331	FSTVGGESGSADTVRDPR	R	G	0.997	44.2	25	31.2	2.21	1	0	0	0	2	1837.87			671665	109	126	Empty	true
Fed	unknown protein	06549fasting_1_798	Tityus2_.fasta	42.296,1	0.98	1	1	1	0.000675	0.0535	LDLNHFFGGNTPFIYIGEAK	K	K	0.997	86.2	25	86.2	7.43	1	0	0	0	2	2253.13			591105	20	39	Empty	true
Fed	Hemocyanin II	10999fasting_2_31207	Tityus2_.fasta	72.662,2	1	8	8	9	0.00608	0.247	ASTKPAGDESPIVVDVK	K	E	0.997	55.8	25.6	54.7	5.57	2	0	0	0	2	1712.91			1546820	134	150	Empty	true
Fed	Hemocyanin II	10999fasting_2_31207	Tityus2_.fasta	72.662,2	1	8	8	9	0.00608	0.247	EQLSFPGVDVVDIR	K	V	0.997	91.4	26.3	79.8	4.96	1	0	0	0	2	1573.82			570149	386	399	Empty	true
Fed	Hemocyanin II	10999fasting_2_31207	Tityus2_.fasta	72.662,2	1	8	8	9	0.00608	0.247	EVALDEEHGADILGDLIESSYESK	K	N	0.997	91.2	25	91.2	6.57	1	0	0	0	2	2619.23			262378	294	317	Empty	true
Fed	Hemocyanin II	10999fasting_2_31207	Tityus2_.fasta	72.662,2	1	8	8	9	0.00608	0.247	FIDNIFQDYK	R	A	0.997	54.3	27.4	54.3	3.92	1	0	0	0	2	1302.64			183903	368	377	Empty	false	19977fed_1_12930,02750fasting_2_13777
Fed	Hemocyanin II	10999fasting_2_31207	Tityus2_.fasta	72.662,2	1	8	8	9	0.00608	0.247	FVPAATMAEILSK	R	A	0.997	93.8	27.4	86	3.51	1	0	0	0	2	1377.74			605484	121	133	Empty	true
Fed	Hemocyanin II	10999fasting_2_31207	Tityus2_.fasta	72.662,2	1	8	8	9	0.00608	0.247	GLSVPPIQQIFPER	K	F	0.997	45.8	25	35.1	2.82	1	0	0	0	2	1580.88			321814	107	120	Empty	true
Fed	Hemocyanin II	10999fasting_2_31207	Tityus2_.fasta	72.662,2	1	8	8	9	0.00608	0.247	HLSLATVGGEVPHEQR	K	D	0.997	41.3	25.4	41.3	5.21	1	0	0	0	2	1729.9			570540	16	31	Empty	true
Fed	Hemocyanin II	10999fasting_2_31207	Tityus2_.fasta	72.662,2	1	8	8	9	0.00608	0.247	HLYEVFYEAKDFDDFVHLAQEAR	R	T	0.997	162	25	162	27.2	1	0	0	0	2	2842.35			521243	61	83	Empty	true
Fed	Hemocyanin II	10999fasting_2_31207	Tityus2_.fasta	72.662,2	1	8	8	9	0.00608	0.247	MVPFHNFDEELEGYAPHLSHLSSGR	R	Y	0.997	105	25	105	9.92	1	0	0	0	2	2869.34			366378	225	249	Empty	true
Fed	Fumarylacetoacetase	15148fasting_3_4542	Tityus2_.fasta	50.929,5	0.98	1	1	1	0.000675	0.0417	ASSVVVSGTPIHRPHGQTR	R	A	0.997	25.9	25	25.9	1.89	1	0	0	0	2	1986.06			204802	163	181	Empty	true
Fed	unknown protein	06266fasting_2_577,21059fed_3_15073	Tityus2_.fasta	16.893,8	0.98	1	1	1	0.000675	0.0537	VIFDYLLK	K	V	0.997	37.5	25	28.6	1.27	1	0	0	0	2	1010.59			309125	131	138	Empty	true
Fed	Ras GTPase-activating protein 3	17523fed_1_10020	Tityus2_.fasta	95.851,0	0.995	1	1	1	0.000675	0.00839	KIVSFLK	R	A	0.988	45	25	0	5.1	1	0	0	0	2	8345448			1807000	347	353	Empty	true
Fed	Hemocyanin F chain	10353fasting_2_29561	Tityus2_.fasta	71.568,2	1	7	7	7	0.00473	0.182	ASLHSYDEHDLDFPGVHIEHVTVNAK	K	V	0.997	121	25	121	16.7	1	0	0	0	2	2930.41			776234	374	399	Empty	true
Fed	Hemocyanin F chain	10353fasting_2_29561	Tityus2_.fasta	71.568,2	1	7	7	7	0.00473	0.182	FVPAETINHALK	R	A	0.997	61.5	26.1	60.8	4.08	1	0	0	0	2	1339.74			651040	119	130	Empty	true
Fed	Hemocyanin F chain	10353fasting_2_29561	Tityus2_.fasta	71.568,2	1	7	7	7	0.00473	0.182	GLYIELDKFHK	R	E	0.997	38.8	26.9	38.8	0.824	1	0	0	0	2	1362.74			387638	477	487	Empty	true
Fed	Hemocyanin F chain	10353fasting_2_29561	Tityus2_.fasta	71.568,2	1	7	7	7	0.00473	0.182	ILPLFEHLTSLTAK	R	Q	0.997	101	25	88.4	5.74	1	0	0	0	2	1582.92			355894	10	23	Empty	true
Fed	Hemocyanin F chain	10353fasting_2_29561	Tityus2_.fasta	71.568,2	1	7	7	7	0.00473	0.182	TPSQFATPNM	R	S	0.993	20.6	37.3	2.02	1.16	1	0	0	0	1	1093.5			1666240	605	614	Empty	true
Fed	Hemocyanin F chain	10353fasting_2_29561	Tityus2_.fasta	71.568,2	1	7	7	7	0.00473	0.182	VPDVITTTMKEDVLQLSHGIK	K	T	0.997	127	25	116	7.46	1	0	0	0	2	2324.25			406057	400	420	Empty	true
Fed	Hemocyanin F chain	10353fasting_2_29561	Tityus2_.fasta	71.568,2	1	7	7	7	0.00473	0.182	VQFEHLDHEPFSYSIEIQNK	K	S	0.997	40.2	25	40.2	8.11	1	0	0	0	2	2460.18			243275	427	446	Empty	true
Fed	Focal adhesion kinase 1	26084fed_1_23351	Tityus2_.fasta	119.288,9	0.98	1	1	2	0.00135	0.0125	NDSPITKYSSIPR	R	K	0.997	31.4	25.9	30	0.959	2	0	0	0	2	1477.76			1065800	327	339	Empty	true
Fed	Glycogen debranching enzyme	17971fed_2_10460	Tityus2_.fasta	176.900,0	1	4	4	4	0.0027	0.0258	IPELFLIDVDSLTEEFIK	K	K	0.997	78.8	25	76.9	8.62	1	0	0	0	2	2121.14			77.770,7	312	329	Empty	true
Fed	Glycogen debranching enzyme	17971fed_2_10460	Tityus2_.fasta	176.900,0	1	4	4	4	0.0027	0.0258	IPELFLIDVDSLTEEFIKK	K	V	0.997	123	25	123	6.57	1	0	0	0	2	2249.23			314869	312	330	Empty	true
Fed	Glycogen debranching enzyme	17971fed_2_10460	Tityus2_.fasta	176.900,0	1	4	4	4	0.0027	0.0258	LGISSLIR	R	E	0.997	49.3	28.2	31	1.64	1	0	0	0	2	8585408			530569	585	592	Empty	true
Fed	Glycogen debranching enzyme	17971fed_2_10460	Tityus2_.fasta	176.900,0	1	4	4	4	0.0027	0.0258	LQNVSAANPLVPK	K	Y	0.997	71.4	25	68	4.62	1	0	0	0	2	1350.77			197774	431	443	Empty	true
Fed	Myelin expression factor 2	27015fed_2_25323	Tityus2_.fasta	47.590,9	0.941	1	1	1	0.000675	0.0224	VISIELKTDK	K	E	0.992	38.1	25.5	26.3	0	1	0	0	0	2	1145.68			2487550	236	245	Empty	true
Fed	Clathrin heavy chain 1	23349fed_1_20689	Tityus2_.fasta	191.384,3	0.953	1	1	1	0.000675	0.0054	LLLSWLEMR	K	V	0.993	18.8	27.5	0	0.585	1	0	0	0	2	1160.65			4951570	857	865	Empty	true
Fed	CLIP-associating protein 1	21163fed_3_15208	Tityus2_.fasta	83.872,0	0.852	1	1	1	0.000675	0.0147	QLEIPFQLSVK	R	D	0.977	21.5	25	4.21	1.68	1	0	0	0	2	1301.75			883693	361	371	Empty	true
Fed	unknown protein	06268fasting_2_579,23287fed_3_20624	Tityus2_.fasta	33.500,7	0.792	1	1	1	0.000675	0.0261	LDAAIQFK	K	I	0.966	52.2	29.4	44.7	0	1	0	0	0	2	9055092			644751	118	125	Empty	true
Fed	L-like cysteine peptidase 1	33787Fed_cathepsin	Tityus2_.fasta	21.742,8	0.98	1	1	1	0.000675	0.0707	QSVGATCTGYVDVK	R	S	0.997	104	25.6	96.2	6.96	1	0	0	0	2	1484.71			446524	83	96	Empty	true
Fed	Ovostatin	06146fasting_1_496	Tityus2_.fasta	75.909,7	1	4	4	4	0.0027	0.0837	FINVDQTELER	K	S	0.997	58.7	27.7	51	4.54	1	0	0	0	2	1363.69			1122450	455	465	Empty	true	23681fed_1_2
Fed	Ovostatin	06146fasting_1_496	Tityus2_.fasta	75.909,7	1	4	4	4	0.0027	0.0837	HDQSGSLWLTAFVIR	K	S	0.997	43.9	25.3	43.9	2.92	1	0	0	0	2	1729.9			104001	433	447	Empty	true
Fed	Ovostatin	06146fasting_1_496	Tityus2_.fasta	75.909,7	1	4	4	4	0.0027	0.0837	LLDTAEYVRPYQK	R	T	0.997	72.7	25.8	65.5	3.64	1	0	0	0	2	1595.84			1121850	8	20	Empty	true
Fed	Ovostatin	06146fasting_1_496	Tityus2_.fasta	75.909,7	1	4	4	4	0.0027	0.0837	NQSLKPLGFVDAITAFTK	K	A	0.997	80.4	25	80.4	7.11	1	0	0	0	2	1950.07			79.774,1	31	48	Empty	true	23681fed_1_2
Fed	Tumor necrosis factor alpha-induced protein 8-like protein	16039fasting_1_5834	Tityus2_.fasta	21.541,8	0.98	1	1	1	0.000675	0.0479	SLLKDLVVR	R	H	0.997	57.7	25.7	44.3	1.4	1	0	0	0	2	1042.66			623658	127	135	Empty	true
Fed	Alpha-2-macroglobulin	23681fed_1_2	Tityus2_.fasta	88.588,8	0.98	1	1	1	0.000675	0.0705	FINVDQTELER	K	S	0.997	58.7	27.7	51	4.54	1	0	0	0	2	1363.69			1122450	714	724	Empty	false	06146fasting_1_496
Fed	Alpha-2-macroglobulin	23681fed_1_2	Tityus2_.fasta	88.588,8	0.98	1	1	1	0.000675	0.0705	FSLTQWFSATGHNLQIEPVSSAVECGK	R	L	0.997	185	25	185	20.1	1	0	0	0	2	2993.45			178819	61	87	Empty	true
Fed	Alpha-2-macroglobulin	23681fed_1_2	Tityus2_.fasta	88.588,8	0.98	1	1	1	0.000675	0.0705	NQSLKPLGFVDAITAFTK	K	A	0.997	80.4	25	80.4	7.11	1	0	0	0	2	1950.07			79.774,1	290	307	Empty	false	06146fasting_1_496
Fed	Filamin-A	06594fasting_3_840	Tityus2_.fasta	237.867,5	1	15	15	15	0.0101	0.114	AGGNAPLNVTIADEEYRPVDLK	K	I	0.997	86.2	25	86.2	6.89	1	0	0	0	2	2342.2			1153540	674	695	Empty	true
Fed	Filamin-A	06594fasting_3_840	Tityus2_.fasta	237.867,5	1	15	15	15	0.0101	0.114	AQTPTHFNIDCR	K	D	0.997	99.9	25	99.9	4.96	1	0	0	0	2	1459.67			670995	758	769	Empty	true
Fed	Filamin-A	06594fasting_3_840	Tityus2_.fasta	237.867,5	1	15	15	15	0.0101	0.114	AVGALVDAVAPGLCPDWPDWTPANALK	R	N	0.997	75.9	25	75.9	9	1	0	0	0	2	2804.41			320443	171	197	Empty	true
Fed	Filamin-A	06594fasting_3_840	Tityus2_.fasta	237.867,5	1	15	15	15	0.0101	0.114	GVPASIPVEFTIDAK	K	D	0.997	43.5	25.9	41.3	2.25	1	0	0	0	2	1543.84			272583	1141	1155	Empty	true
Fed	Filamin-A	06594fasting_3_840	Tityus2_.fasta	237.867,5	1	15	15	15	0.0101	0.114	IECNDLGDGSADVK	K	Y	0.997	100	25	100	5.01	1	0	0	0	2	1492.66			210889	594	607	Empty	true
Fed	Filamin-A	06594fasting_3_840	Tityus2_.fasta	237.867,5	1	15	15	15	0.0101	0.114	IKVDGLEPSVFLDSPTDFIVDAR	K	A	0.997	97.9	25	94.9	9.14	1	0	0	0	2	2533.32			331169	841	863	Empty	true
Fed	Filamin-A	06594fasting_3_840	Tityus2_.fasta	237.867,5	1	15	15	15	0.0101	0.114	LIALVEVLSGK	R	K	0.997	53	25	46	0	1	0	0	0	2	1141.72			519860	51	61	Empty	true
Fed	Filamin-A	06594fasting_3_840	Tityus2_.fasta	237.867,5	1	15	15	15	0.0101	0.114	LPVAPGEYKIMVK	Y	F	0.997	19.2	37.2	2.74	3.28	1	0	0	0	1	1444.82			259091	1474	1486	Empty	true
Fed	Filamin-A	06594fasting_3_840	Tityus2_.fasta	237.867,5	1	15	15	15	0.0101	0.114	NINNLETDLADGLR	K	L	0.997	80.3	26.6	78.9	3.47	1	0	0	0	2	1557.79			468373	37	50	Empty	true
Fed	Filamin-A	06594fasting_3_840	Tityus2_.fasta	237.867,5	1	15	15	15	0.0101	0.114	SPFEVNVGPFKDSK	R	I	0.997	85.4	26.7	81.5	7.23	1	0	0	0	2	1550.79			374260	539	552	Empty	true
Fed	Filamin-A	06594fasting_3_840	Tityus2_.fasta	237.867,5	1	15	15	15	0.0101	0.114	TDSLVHSLNDGTYR	R	I	0.997	105	25.9	103	5.31	1	0	0	0	2	1577.76			379680	885	898	Empty	true
Fed	Filamin-A	06594fasting_3_840	Tityus2_.fasta	237.867,5	1	15	15	15	0.0101	0.114	TDYFPEKVEAYGPGLQK	K	T	0.997	88.3	25.6	88.3	7.28	1	0	0	0	2	1941.96			1254050	640	656	Empty	true
Fed	Filamin-A	06594fasting_3_840	Tityus2_.fasta	237.867,5	1	15	15	15	0.0101	0.114	VFTENAGDGVLNVK	K	V	0.997	104	27.3	102	6.24	1	0	0	0	2	1462.75			761887	479	492	Empty	true
Fed	Filamin-A	06594fasting_3_840	Tityus2_.fasta	237.867,5	1	15	15	15	0.0101	0.114	VIGPGGAPEHVDVR	K	K	0.997	46.2	27.6	46.2	2.68	1	0	0	0	2	1402.74			674069	493	506	Empty	true
Fed	Filamin-A	06594fasting_3_840	Tityus2_.fasta	237.867,5	1	15	15	15	0.0101	0.114	VTASGPGLEPTGVMIGRPTYFDIFTK	K	D	0.997	102	25	102	8.59	1	0	0	0	2	2754.42			296491	358	383	Empty	true
Fed	Phosphoribosylformylglycinamidine synthase	00735fasting_3_11189,24419fed_1_79	Tityus2_.fasta	145.611,0	1	16	17	19	0.0128	0.204	AELDFNAVQR	K	G	0.997	53.2	28.9	50.9	1.06	1	0	0	0	2	1162.59			456945	482	491	Empty	true
Fed	Phosphoribosylformylglycinamidine synthase	00735fasting_3_11189,24419fed_1_79	Tityus2_.fasta	145.611,0	1	16	17	19	0.0128	0.204	CSGNWMWAAK	K	L	0.997	62.9	25	62.9	4.59	1	0	0	0	2	1210.51			621678	755	764	Empty	true
Fed	Phosphoribosylformylglycinamidine synthase	00735fasting_3_11189,24419fed_1_79	Tityus2_.fasta	145.611,0	1	16	17	19	0.0128	0.204	EKCPVNFIGEVIGNGR	R	I	0.997	36.9	25.9	28.9	2.89	1	0	0	0	2	1788.91			47.378,2	587	602	Empty	true
Fed	Phosphoribosylformylglycinamidine synthase	00735fasting_3_11189,24419fed_1_79	Tityus2_.fasta	145.611,0	1	16	17	19	0.0128	0.204	ESHRPSSFITHSGVR	K	H	0.997	77.5	25.8	76.7	6.27	2	0	0	0	2	1696.85			702710	293	307	Empty	true
Fed	Phosphoribosylformylglycinamidine synthase	00735fasting_3_11189,24419fed_1_79	Tityus2_.fasta	145.611,0	1	16	17	19	0.0128	0.204	FGEPVILGFAR	K	S	0.997	81.8	27.7	80.5	6.62	1	0	0	0	2	1205.67			591781	401	411	Empty	true
Fed	Phosphoribosylformylglycinamidine synthase	00735fasting_3_11189,24419fed_1_79	Tityus2_.fasta	145.611,0	1	16	17	19	0.0128	0.204	FSDNSSAILGYAVNILLPK	K	E	0.997	97.4	25	95.9	5.07	2	0	0	0	2	2022.09			268835	274	292	Empty	true
Fed	Phosphoribosylformylglycinamidine synthase	00735fasting_3_11189,24419fed_1_79	Tityus2_.fasta	145.611,0	1	16	17	19	0.0128	0.204	GHLLYVDLSSGK	K	G	0.997	55	28	53.1	4.64	1	0	0	0	2	1288.69			970538	840	851	Empty	true
Fed	Phosphoribosylformylglycinamidine synthase	00735fasting_3_11189,24419fed_1_79	Tityus2_.fasta	145.611,0	1	16	17	19	0.0128	0.204	GMEDSILGVWVAHGEGR	R	F	0.997	101	25	101	6.1	1	0	0	0	2	1812.87			280554	1203	1219	Empty	true
Fed	Phosphoribosylformylglycinamidine synthase	00735fasting_3_11189,24419fed_1_79	Tityus2_.fasta	145.611,0	1	16	17	19	0.0128	0.204	GVVFPGGFSYADVLGSAR	R	G	0.997	61.4	25.7	61.4	6.48	1	0	0	0	2	1798.91			399084	1100	1117	Empty	true
Fed	Phosphoribosylformylglycinamidine synthase	00735fasting_3_11189,24419fed_1_79	Tityus2_.fasta	145.611,0	1	16	17	19	0.0128	0.204	HLAMMPHPER	R	C	0.997	71	26.9	61.8	5.82	1	0	0	0	2	1218.59			311197	1273	1282	Empty	true
Fed	Phosphoribosylformylglycinamidine synthase	00735fasting_3_11189,24419fed_1_79	Tityus2_.fasta	145.611,0	1	16	17	19	0.0128	0.204	IGVGGGSASSVHVQGDQK	R	A	0.997	81.3	26.2	77.5	5.1	1	0	0	0	2	1682.85			34.821,5	464	481	Empty	true
Fed	Phosphoribosylformylglycinamidine synthase	00735fasting_3_11189,24419fed_1_79	Tityus2_.fasta	145.611,0	1	16	17	19	0.0128	0.204	KQGCFLAHNVSER	R	F	0.997	34.8	26.2	33.4	4.2	1	0	0	0	2	1545.76			72.732,3	1171	1183	Empty	true
Fed	Phosphoribosylformylglycinamidine synthase	00735fasting_3_11189,24419fed_1_79	Tityus2_.fasta	145.611,0	1	16	17	19	0.0128	0.204	LGGSALAQCFNQLGDNTADLDSPELLR	R	T	0.997	119	25	119	15.4	1	0	0	0	2	2875.39			278645	854	880	Empty	true
Fed	Phosphoribosylformylglycinamidine synthase	00735fasting_3_11189,24419fed_1_79	Tityus2_.fasta	145.611,0	1	16	17	19	0.0128	0.204	MSVAEAVTNLMFAPISSLKDAK	R	C	0.997	138	25	138	14	1	0	0	0	2	2323.2			1040880	733	754	Empty	true
Fed	Phosphoribosylformylglycinamidine synthase	00735fasting_3_11189,24419fed_1_79	Tityus2_.fasta	145.611,0	1	16	17	19	0.0128	0.204	NPTTVECFDLAQSNSEHSR	R	H	0.997	176	25	175	13.2	2	0	0	0	2	2191.97			679122	218	236	Empty	true
Fed	Phosphoribosylformylglycinamidine synthase	00735fasting_3_11189,24419fed_1_79	Tityus2_.fasta	145.611,0	1	16	17	19	0.0128	0.204	TVPCQYIGYSSGFANEAMVILNINNEVVLQNK	K	M	0.953	5.14	25	5.14	1.34	1	0	0	0	2	3585.77			351334	963	994	Empty	true
Fed	Dipeptidyl peptidase 4	00565fasting_2_11024	Tityus2_.fasta	68.973,7	0.98	1	1	1	0.000675	0.0183	KNYIYAWIDGR	R	G	0.997	22.6	26.6	11.2	1.52	1	0	0	0	2	1398.72			4239610	389	399	Empty	true
Fed	unknown protein	05978fasting_2_363	Tityus2_.fasta	75.890,9	1	11	11	11	0.00743	0.204	DIVTINYLDK	K	T	0.997	50.7	27.9	44.8	0	1	0	0	0	2	1193.64			161916	501	510	Empty	true
Fed	unknown protein	05978fasting_2_363	Tityus2_.fasta	75.890,9	1	11	11	11	0.00743	0.204	FTSLSLTK	K	G	0.997	43.8	26.7	23.5	0.678	1	0	0	0	2	8965088			1439430	284	291	Empty	true
Fed	unknown protein	05978fasting_2_363	Tityus2_.fasta	75.890,9	1	11	11	11	0.00743	0.204	GAQILISDGNTR	K	F	0.997	51.5	27.9	23.6	1.96	1	0	0	0	2	1244.66			1246180	292	303	Empty	true
Fed	unknown protein	05978fasting_2_363	Tityus2_.fasta	75.890,9	1	11	11	11	0.00743	0.204	GNIPNFPIVSDTSK	K	M	0.997	62	27	58.6	4.09	1	0	0	0	2	1488.77			735467	416	429	Empty	true
Fed	unknown protein	05978fasting_2_363	Tityus2_.fasta	75.890,9	1	11	11	11	0.00743	0.204	ISLIPADGK	R	I	0.997	36.2	26.4	14.8	0.959	1	0	0	0	2	9135355			777880	332	340	Empty	true
Fed	unknown protein	05978fasting_2_363	Tityus2_.fasta	75.890,9	1	11	11	11	0.00743	0.204	SGFLLTTK	K	N	0.966	57.2	27.8	48.7	0	1	0	0	0	2	8664983			847049	533	540	Empty	true
Fed	unknown protein	05978fasting_2_363	Tityus2_.fasta	75.890,9	1	11	11	11	0.00743	0.204	SHSLGGYFQNEGK	R	I	0.997	43.5	26	43.5	3.47	1	0	0	0	2	1423.66			1287110	349	361	Empty	true
Fed	unknown protein	05978fasting_2_363	Tityus2_.fasta	75.890,9	1	11	11	11	0.00743	0.204	SLVLDITKLEDIPELYLTAK	K	S	0.997	174	25	174	11	1	0	0	0	2	2274.28			2790320	513	532	Empty	true
Fed	unknown protein	05978fasting_2_363	Tityus2_.fasta	75.890,9	1	11	11	11	0.00743	0.204	TFIDSETFKADFLGMTK	K	G	0.997	112	38.1	0	0	1	0	0	0	2	1963.91			406190	436	452	Empty	true
Fed	unknown protein	05978fasting_2_363	Tityus2_.fasta	75.890,9	1	11	11	11	0.00743	0.204	TNLVLTISPNEK	K	G	0.997	70.5	26.3	63.4	3.46	1	0	0	0	2	1328.74			766454	211	222	Empty	true
Fed	unknown protein	05978fasting_2_363	Tityus2_.fasta	75.890,9	1	11	11	11	0.00743	0.204	TVTYSGNQAPFSLVVK	K	G	0.997	103	25.1	99.6	7.62	1	0	0	0	2	1710.91			461770	89	104	Empty	true
Fed	MAM and LDL-receptor class A domain-containing protein C10orf112	23622fed_2_152	Tityus2_.fasta	580.276,3	1	17	18	18	0.0122	0.0398	DTNDNIFTWTITK	R	A	0.997	105	26.3	105	8.02	1	0	0	0	2	1568.76			197107	4004	4016	Empty	true
Fed	MAM and LDL-receptor class A domain-containing protein C10orf112	23622fed_2_152	Tityus2_.fasta	580.276,3	1	17	18	18	0.0122	0.0398	GSIGDYWIR	K	S	0.997	64.8	28.5	58.9	1.6	1	0	0	0	2	1066.53			437984	3866	3874	Empty	true
Fed	MAM and LDL-receptor class A domain-containing protein C10orf112	23622fed_2_152	Tityus2_.fasta	580.276,3	1	17	18	18	0.0122	0.0398	HSDILEVLK	K	L	0.997	76.2	26.3	63.7	5.54	1	0	0	0	2	1053.59			207010	247	255	Empty	true
Fed	MAM and LDL-receptor class A domain-containing protein C10orf112	23622fed_2_152	Tityus2_.fasta	580.276,3	1	17	18	18	0.0122	0.0398	IALISSTTFLPTFAK	R	D	0.997	70	25	60.3	4.1	1	0	0	0	2	1609.92			325191	3387	3401	Empty	true
Fed	MAM and LDL-receptor class A domain-containing protein C10orf112	23622fed_2_152	Tityus2_.fasta	580.276,3	1	17	18	18	0.0122	0.0398	IFEGEISNKNK	F	S	0.992	21.6	38.6	9.17	0.699	1	0	0	0	1	1278.67			102744	1401	1411	Empty	true
Fed	MAM and LDL-receptor class A domain-containing protein C10orf112	23622fed_2_152	Tityus2_.fasta	580.276,3	1	17	18	18	0.0122	0.0398	KEPFSLSFSR	R	V	0.997	58.2	27.1	41.5	2.4	1	0	0	0	2	1197.63			323243	3673	3682	Empty	true
Fed	MAM and LDL-receptor class A domain-containing protein C10orf112	23622fed_2_152	Tityus2_.fasta	580.276,3	1	17	18	18	0.0122	0.0398	LGQESYLAIEKK	K	Y	0.997	88.7	26.2	88.7	5.8	1	0	0	0	2	1378.76			874360	4248	4259	Empty	true
Fed	MAM and LDL-receptor class A domain-containing protein C10orf112	23622fed_2_152	Tityus2_.fasta	580.276,3	1	17	18	18	0.0122	0.0398	LLSPFLTSK	R	N	0.997	58.1	25.7	42.9	1	2	0	0	0	2	1005.6			562987	2554	2562	Empty	true
Fed	MAM and LDL-receptor class A domain-containing protein C10orf112	23622fed_2_152	Tityus2_.fasta	580.276,3	1	17	18	18	0.0122	0.0398	LVTDMPLAYK	K	L	0.997	61.4	27.5	51.3	2.92	1	0	0	0	2	1150.62			513850	451	460	Empty	true
Fed	MAM and LDL-receptor class A domain-containing protein C10orf112	23622fed_2_152	Tityus2_.fasta	580.276,3	1	17	18	18	0.0122	0.0398	NSYSSDGLELIYSYK	R	T	0.997	118	25.2	111	8.15	1	0	0	0	2	1738.82			224233	4304	4318	Empty	true
Fed	MAM and LDL-receptor class A domain-containing protein C10orf112	23622fed_2_152	Tityus2_.fasta	580.276,3	1	17	18	18	0.0122	0.0398	SIFDDGPK	R	S	0.966	57.6	30	43.2	0	1	0	0	0	2	8784256			593192	45	52	Empty	true
Fed	MAM and LDL-receptor class A domain-containing protein C10orf112	23622fed_2_152	Tityus2_.fasta	580.276,3	1	17	18	18	0.0122	0.0398	STGESPFNGEKPETDHTTNTVTGK	R	F	0.997	92.2	25	92.2	8.85	1	0	0	0	2	2534.16			526366	1837	1860	Empty	true
Fed	MAM and LDL-receptor class A domain-containing protein C10orf112	23622fed_2_152	Tityus2_.fasta	580.276,3	1	17	18	18	0.0122	0.0398	TLPSPFSVDASWLR	R	V	0.997	76.8	26.6	74.3	4.12	1	0	0	0	2	1575.82			478154	337	350	Empty	true
Fed	MAM and LDL-receptor class A domain-containing protein C10orf112	23622fed_2_152	Tityus2_.fasta	580.276,3	1	17	18	18	0.0122	0.0398	TTISLWK	K	E	0.988	35.8	29.4	18.4	1.23	1	0	0	0	2	8484877			433021	262	268	Empty	true
Fed	MAM and LDL-receptor class A domain-containing protein C10orf112	23622fed_2_152	Tityus2_.fasta	580.276,3	1	17	18	18	0.0122	0.0398	TTNSDDDKIITLWDR	K	S	0.997	104	25.6	102	9.59	1	0	0	0	2	1792.87			1528190	4524	4538	Empty	true
Fed	MAM and LDL-receptor class A domain-containing protein C10orf112	23622fed_2_152	Tityus2_.fasta	580.276,3	1	17	18	18	0.0122	0.0398	WTTSTIFGQYYEK	R	V	0.997	86.2	25.9	86.2	6.26	1	0	0	0	2	1623.77			187160	3020	3032	Empty	true
Fed	MAM and LDL-receptor class A domain-containing protein C10orf112	23622fed_2_152	Tityus2_.fasta	580.276,3	1	17	18	18	0.0122	0.0398	YIFQAVMGK	R	S	0.997	44.3	28	39.4	2.59	1	0	0	0	2	1056.55			491493	2461	2469	Empty	true
Fed	Lysosomal alpha-glucosidase	18167fed_3_10667	Tityus2_.fasta	107.750,2	1	2	2	2	0.00135	0.0276	LNPFNLLVVLDDDR	R	S	0.997	80.7	25.3	78.4	3.68	1	0	0	0	2	1642.88			755113	829	842	Empty	true
Fed	Lysosomal alpha-glucosidase	18167fed_3_10667	Tityus2_.fasta	107.750,2	1	2	2	2	0.00135	0.0276	WSALGAFYPFSR	R	N	0.997	68.4	26.8	60.9	4.3	1	0	0	0	2	1401.69			81.773,0	671	682	Empty	true
Fed	Calcium-transporting ATPase sarcoplasmic-endoplasmic reticulum type	26540fed_2_24694	Tityus2_.fasta	109.900,1	0.98	1	1	1	0.000675	0.00799	EFTLEFSR	K	D	0.997	42.5	26.8	27.5	1.85	1	0	0	0	2	1028.5			526152	483	490	Empty	true	02437fasting_3_13258
Fed	Leukocyte elastase inhibitor	05846fasting_2_272	Tityus2_.fasta	42.526,4	0.995	1	1	1	0.000675	0.0405	ELTNDIFKDFFTHFR	R	K	0.997	119	25.2	119	4.82	1	0	0	0	2	1929.95			304625	241	255	Empty	true
Fed	Alpha-actinin, sarcomeric	00413fasting_3_10882,18069fed_2_10566	Tityus2_.fasta	103.705,6	1	2	2	2	0.00135	0.0246	LASDLLEWIR	R	R	0.997	75.9	27.1	63.1	3.49	1	0	0	0	2	1215.67			116869	283	292	Empty	true
Fed	Alpha-actinin, sarcomeric	00413fasting_3_10882,18069fed_2_10566	Tityus2_.fasta	103.705,6	1	2	2	2	0.00135	0.0246	VGWEQLLTSIHR	R	N	0.997	83.7	38.2	75.6	0	1	0	0	0	2	1415.76			103617	716	727	Empty	true
Fed	Hemocyanin AA6 chain	04165fasting_1_16742,27819fed_3_26963	Tityus2_.fasta	71.668,1	1	20	21	24	0.0162	0.435	DAIYPDKKPMGFPFDRPIHVR	K	N	0.997	119	25	119	7.31	1	0	0	0	2	2499.3			769283	584	604	Empty	true
Fed	Hemocyanin AA6 chain	04165fasting_1_16742,27819fed_3_26963	Tityus2_.fasta	71.668,1	1	20	21	24	0.0162	0.435	DFDDFYLLAK	K	Q	0.997	40.1	26.9	40.1	2.39	1	0	0	0	2	1246.6			324690	69	78	Empty	true
Fed	Hemocyanin AA6 chain	04165fasting_1_16742,27819fed_3_26963	Tityus2_.fasta	71.668,1	1	20	21	24	0.0162	0.435	DLDEATKLYEILYHAKDFDDFYLLAK	K	Q	0.997	0	0	0	13.8	1	0	0	0	2	3149.57			393408	53	78	Empty	true
Fed	Hemocyanin AA6 chain	04165fasting_1_16742,27819fed_3_26963	Tityus2_.fasta	71.668,1	1	20	21	24	0.0162	0.435	DLKDVDVQDMER	R	W	0.997	80	25.7	66.2	3.51	2	0	0	0	2	1462.68			1476030	257	268	Empty	true
Fed	Hemocyanin AA6 chain	04165fasting_1_16742,27819fed_3_26963	Tityus2_.fasta	71.668,1	1	20	21	24	0.0162	0.435	EANNNPNSDVVVEVEETGNILDPEYK	K	L	0.997	110	25	110	10.2	1	0	0	0	2	2888.34			169538	131	156	Empty	true
Fed	Hemocyanin AA6 chain	04165fasting_1_16742,27819fed_3_26963	Tityus2_.fasta	71.668,1	1	20	21	24	0.0162	0.435	EQIDFPGVEVTNVTVNAK	R	K	0.997	81.2	25	79.7	6.35	1	0	0	0	2	1960			336571	381	398	Empty	true
Fed	Hemocyanin AA6 chain	04165fasting_1_16742,27819fed_3_26963	Tityus2_.fasta	71.668,1	1	20	21	24	0.0162	0.435	FDELGNVLDVNEQRR	K	L	0.997	63.5	26.2	62.5	5.55	1	0	0	0	2	1803.9			351560	464	478	Empty	true
Fed	Hemocyanin AA6 chain	04165fasting_1_16742,27819fed_3_26963	Tityus2_.fasta	71.668,1	1	20	21	24	0.0162	0.435	FVDNIFQDYK	R	A	0.997	74.8	27.5	67.8	4.06	1	0	0	0	2	1288.62			985076	363	372	Empty	true
Fed	Hemocyanin AA6 chain	04165fasting_1_16742,27819fed_3_26963	Tityus2_.fasta	71.668,1	1	20	21	24	0.0162	0.435	FVDNIFQDYKATLHPYTR	R	E	0.997	92.2	25	92.2	5.44	1	0	0	0	2	2228.11			589329	363	380	Empty	true
Fed	Hemocyanin AA6 chain	04165fasting_1_16742,27819fed_3_26963	Tityus2_.fasta	71.668,1	1	20	21	24	0.0162	0.435	FVPAETVNLAIK	R	E	0.997	71.5	25.9	59.5	4.92	1	0	0	0	2	1301.75			2196740	119	130	Empty	true
Fed	Hemocyanin AA6 chain	04165fasting_1_16742,27819fed_3_26963	Tityus2_.fasta	71.668,1	1	20	21	24	0.0162	0.435	IFLGPKFDELGNVLDVNEQR	R	R	0.997	54.3	25	54.3	6.33	1	0	0	0	2	2303.2			254071	458	477	Empty	true
Fed	Hemocyanin AA6 chain	04165fasting_1_16742,27819fed_3_26963	Tityus2_.fasta	71.668,1	1	20	21	24	0.0162	0.435	IFLGPKFDELGNVLDVNEQRR	R	L	0.997	0	0	0	9.57	1	0	0	0	2	2459.3			502656	458	478	Empty	true
Fed	Hemocyanin AA6 chain	04165fasting_1_16742,27819fed_3_26963	Tityus2_.fasta	71.668,1	1	20	21	24	0.0162	0.435	ILSLFEHLTSLTEK	R	Q	0.997	101	25	85.4	4.35	2	0	0	0	2	1630.91			854792	10	23	Empty	true
Fed	Hemocyanin AA6 chain	04165fasting_1_16742,27819fed_3_26963	Tityus2_.fasta	71.668,1	1	20	21	24	0.0162	0.435	KNNTIHTFIKDEELELSHGIR	K	F	0.997	0	0	0	10.7	1	0	0	0	2	2494.31			279037	399	419	Empty	true
Fed	Hemocyanin AA6 chain	04165fasting_1_16742,27819fed_3_26963	Tityus2_.fasta	71.668,1	1	20	21	24	0.0162	0.435	LAGVGILKR	R	G	0.997	51.6	25	43.2	1000	1	0	0	0	2	9266147			401165	34	42	Empty	true
Fed	Hemocyanin AA6 chain	04165fasting_1_16742,27819fed_3_26963	Tityus2_.fasta	71.668,1	1	20	21	24	0.0162	0.435	NLQEFLTPNIHVTDIDIKFDG	R	-	0.997	80.5	25	80.5	7.34	2	0	0	0	2	2429.24			1338300	605	625	Empty	true
Fed	Hemocyanin AA6 chain	04165fasting_1_16742,27819fed_3_26963	Tityus2_.fasta	71.668,1	1	20	21	24	0.0162	0.435	NNTIHTFIKDEELELSHGIR	K	F	0.997	43.9	25	43.9	2.05	1	0	0	0	2	2366.21			173116	400	419	Empty	true
Fed	Hemocyanin AA6 chain	04165fasting_1_16742,27819fed_3_26963	Tityus2_.fasta	71.668,1	1	20	21	24	0.0162	0.435	NQEFYGSLHNWGHVLMAR	R	I	0.997	131	25	131	14.4	2	0	0	0	2	2159.02			558829	313	330	Empty	true
Fed	Hemocyanin AA6 chain	04165fasting_1_16742,27819fed_3_26963	Tityus2_.fasta	71.668,1	1	20	21	24	0.0162	0.435	QAHSFVNEGLFVYAVSVALLHRDDCK	K	G	0.997	30.2	25	30.2	2.55	1	0	0	0	2	2975.48			216151	79	104	Empty	true
Fed	Hemocyanin AA6 chain	04165fasting_1_16742,27819fed_3_26963	Tityus2_.fasta	71.668,1	1	20	21	24	0.0162	0.435	RLYIELDKFR	R	A	0.968	0	0	0	0.921	1	0	0	0	2	1352.77			279054	478	487	Empty	true
Fed	Profilin-5	26419fed_1_24575	Tityus2_.fasta	14.334,5	0.975	1	1	1	0.000675	0.121	YEKDANTKPVTQQELK	K	T	0.997	25.6	25.3	25.6	0.658	1	0	0	0	2	1891.98			8.121,80	34	49	Empty	true
Fed	Myosin heavy chain, muscle	03841fasting_3_15996	Tityus2_.fasta	51.572,1	0.98	1	1	1	0.000675	0.0378	TGEDLQAVEDKVNHLNK	K	V	0.997	21.7	25.4	21.3	1.16	1	0	0	0	2	1909.96			484734	3	19	Empty	true
Fed	Hemocyanin AA6 chain	10337fasting_2_29538,29086fed_2_1376	Tityus2_.fasta	71.794,0	1	11	12	12	0.0081	0.27	DLSDVDVQDMVR	K	W	0.997	64.1	25.8	55.3	1.72	1	0	0	0	2	1391.65			796677	258	269	Empty	true
Fed	Hemocyanin AA6 chain	10337fasting_2_29538,29086fed_2_1376	Tityus2_.fasta	71.794,0	1	11	12	12	0.0081	0.27	EKLPVSERDDRLK	R	G	0.997	0	0	0	1.74	1	0	0	0	2	1584.87			651678	23	35	Empty	true
Fed	Hemocyanin AA6 chain	10337fasting_2_29538,29086fed_2_1376	Tityus2_.fasta	71.794,0	1	11	12	12	0.0081	0.27	FIPTETINLANK	R	E	0.997	45.1	26.1	41.9	1.96	1	0	0	0	2	1360.75			1441220	119	130	Empty	true
Fed	Hemocyanin AA6 chain	10337fasting_2_29538,29086fed_2_1376	Tityus2_.fasta	71.794,0	1	11	12	12	0.0081	0.27	FQENPGVMSDTSTSLRDPIFYR	R	W	0.997	115	25	109	9.28	1	0	0	0	2	2560.21			2281660	339	360	Empty	true
Fed	Hemocyanin AA6 chain	10337fasting_2_29538,29086fed_2_1376	Tityus2_.fasta	71.794,0	1	11	12	12	0.0081	0.27	GLTVPPIQEVFPDR	K	F	0.997	34.5	25.6	29.1	0.824	1	0	0	0	2	1567.85			364946	105	118	Empty	true
Fed	Hemocyanin AA6 chain	10337fasting_2_29538,29086fed_2_1376	Tityus2_.fasta	71.794,0	1	11	12	12	0.0081	0.27	GTLFSCFHSR	R	H	0.997	52.7	26.2	52.3	1.82	1	0	0	0	2	1211.56			641303	43	52	Empty	true
Fed	Hemocyanin AA6 chain	10337fasting_2_29538,29086fed_2_1376	Tityus2_.fasta	71.794,0	1	11	12	12	0.0081	0.27	IPLDVEHGTDILGDIIESSDESK	K	N	0.997	111	25	110	5.82	1	0	0	0	2	2482.22			554856	291	313	Empty	true
Fed	Hemocyanin AA6 chain	10337fasting_2_29538,29086fed_2_1376	Tityus2_.fasta	71.794,0	1	11	12	12	0.0081	0.27	LFIELDKFYATLAAGK	R	T	0.997	142	25	132	9.4	1	0	0	0	2	1799.99			426054	480	495	Empty	true
Fed	Hemocyanin AA6 chain	10337fasting_2_29538,29086fed_2_1376	Tityus2_.fasta	71.794,0	1	11	12	12	0.0081	0.27	LPVSERDDRLK	K	G	0.997	0	0	0	0.745	1	0	0	0	2	1327.73			239260	25	35	Empty	true
Fed	Hemocyanin AA6 chain	10337fasting_2_29538,29086fed_2_1376	Tityus2_.fasta	71.794,0	1	11	12	12	0.0081	0.27	MIPFHNFEEPLEGYAPHLTSLVSGLQYASRPEGYSIK	R	D	0.997	132	25	132	10.7	2	0	0	0	2	4194.06			818976	221	257	Empty	true
Fed	Hemocyanin AA6 chain	10337fasting_2_29538,29086fed_2_1376	Tityus2_.fasta	71.794,0	1	11	12	12	0.0081	0.27	TPNVVTTLTK	K	E	0.997	65.5	27.8	59.9	5.72	1	0	0	0	2	1073.62			1056780	400	409	Empty	true
Fed	Lysosomal protective protein	09577fasting_1_28289	Tityus2_.fasta	59.108,9	1	2	2	3	0.00203	0.0516	GSGHMVPQDKPGPAFK	K	M	0.997	64.9	26	64.9	6.15	2	0	0	0	2	1668.82			123690	497	512	Empty	true
Fed	Lysosomal protective protein	09577fasting_1_28289	Tityus2_.fasta	59.108,9	1	2	2	3	0.00203	0.0516	LYNTMKPQVTK	R	L	0.997	54.5	26.3	52.5	1.74	1	0	0	0	2	1322.71			242892	421	431	Empty	true
Fed	Leukocyte elastase inhibitor	04196fasting_3_16784	Tityus2_.fasta	50.481,1	1	4	4	4	0.0027	0.126	FTLEYSR	K	K	0.988	14.3	27.6	0.47	3.2	1	0	0	0	2	9154570			428812	339	345	Empty	true
Fed	Leukocyte elastase inhibitor	04196fasting_3_16784	Tityus2_.fasta	50.481,1	1	4	4	4	0.0027	0.126	LKNEITDNIITTFLK	R	E	0.995	15.8	25	13.9	1.31	1	0	0	0	2	1763			172716	311	325	Empty	true
Fed	Leukocyte elastase inhibitor	04196fasting_3_16784	Tityus2_.fasta	50.481,1	1	4	4	4	0.0027	0.126	SVNNVIFGHGLFR	K	N	0.997	65.6	26.8	65.5	3.24	1	0	0	0	2	1459.78			363240	75	87	Empty	true
Fed	Leukocyte elastase inhibitor	04196fasting_3_16784	Tityus2_.fasta	50.481,1	1	4	4	4	0.0027	0.126	VLQLPYKGDDISMLLVLPYER	K	D	0.997	60.4	25	60.2	7.47	1	0	0	0	2	2462.34			390076	285	305	Empty	true
Fed	MAM and LDL-receptor class A domain-containing protein C10orf112	19500fed_1_12131	Tityus2_.fasta	73.429,4	1	2	2	2	0.00135	0.0282	DGWFAVLSGK	K	K	0.997	61.4	28.6	50.1	2.17	1	0	0	0	2	1079.55			331092	517	526	Empty	true
Fed	MAM and LDL-receptor class A domain-containing protein C10orf112	19500fed_1_12131	Tityus2_.fasta	73.429,4	1	2	2	2	0.00135	0.0282	FLYFFGER	K	N	0.997	42.6	28.6	35	2.07	1	0	0	0	2	1078.54			522209	297	304	Empty	true
Fed	Hemocyanin F chain	02750fasting_2_13777,19977fed_1_12930	Tityus2_.fasta	72.730,8	1	22	24	26	0.0176	0.53	DDKYPDKKPMGFPFDR	K	T	0.997	28	37.7	0	2	1	0	0	0	2	1955.97			1157130	584	599	Empty	true
Fed	Hemocyanin F chain	02750fasting_2_13777,19977fed_1_12930	Tityus2_.fasta	72.730,8	1	22	24	26	0.0176	0.53	DFNDFIHLCEQAR	K	D	0.997	69.2	25	69.1	2.13	1	0	0	0	2	1664.75			708544	69	81	Empty	true
Fed	Hemocyanin F chain	02750fasting_2_13777,19977fed_1_12930	Tityus2_.fasta	72.730,8	1	22	24	26	0.0176	0.53	DLKEVAVQDMER	R	W	0.997	84.3	27	74.7	4.72	3	0	0	0	2	1432.71			2952020	258	269	Empty	true
Fed	Hemocyanin F chain	02750fasting_2_13777,19977fed_1_12930	Tityus2_.fasta	72.730,8	1	22	24	26	0.0176	0.53	DYYGSLHNWGHVMMAR	R	L	0.997	83.9	25	83.9	7.25	1	0	0	0	2	1936.86			326232	316	331	Empty	true
Fed	Hemocyanin F chain	02750fasting_2_13777,19977fed_1_12930	Tityus2_.fasta	72.730,8	1	22	24	26	0.0176	0.53	ETGNILDPEYNLAYFR	K	E	0.997	59	25	55.5	3.26	1	0	0	0	2	1914.92			237181	147	162	Empty	true
Fed	Hemocyanin F chain	02750fasting_2_13777,19977fed_1_12930	Tityus2_.fasta	72.730,8	1	22	24	26	0.0176	0.53	ETGNILDPEYNLAYFREDVEVNAHHWHWHCVYPATWR	K	S	0.997	127	25	127	11.7	1	0	0	0	2	4625.13			403494	147	183	Empty	true
Fed	Hemocyanin F chain	02750fasting_2_13777,19977fed_1_12930	Tityus2_.fasta	72.730,8	1	22	24	26	0.0176	0.53	FIDNIFQDYK	R	D	0.997	54.3	27.4	54.3	3.92	1	0	0	0	2	1302.64			183903	364	373	Empty	true	10999fasting_2_31207
Fed	Hemocyanin F chain	02750fasting_2_13777,19977fed_1_12930	Tityus2_.fasta	72.730,8	1	22	24	26	0.0176	0.53	FIPAETINAALK	R	A	0.997	49.3	26.2	39.8	1.51	1	0	0	0	2	1287.73			1315640	119	130	Empty	true
Fed	Hemocyanin F chain	02750fasting_2_13777,19977fed_1_12930	Tityus2_.fasta	72.730,8	1	22	24	26	0.0176	0.53	GEGLSEDNTEFCSCGWPQHMLLPR	K	G	0.997	197	25	197	15.6	1	0	0	0	2	2820.22			378238	519	542	Empty	true
Fed	Hemocyanin F chain	02750fasting_2_13777,19977fed_1_12930	Tityus2_.fasta	72.730,8	1	22	24	26	0.0176	0.53	GVTVPPIQEIFPDRFIPAETINAALK	R	A	0.997	18.6	25	11.9	1.96	1	0	0	0	2	2836.56			1389270	105	130	Empty	true
Fed	Hemocyanin F chain	02750fasting_2_13777,19977fed_1_12930	Tityus2_.fasta	72.730,8	1	22	24	26	0.0176	0.53	HFFIELDKFHK	R	E	0.997	44.4	26.8	28	2.68	1	0	0	0	2	1460.77			395625	477	487	Empty	true
Fed	Hemocyanin F chain	02750fasting_2_13777,19977fed_1_12930	Tityus2_.fasta	72.730,8	1	22	24	26	0.0176	0.53	IIPLFEHLTSLTR	R	K	0.997	81.7	25	67.6	1.89	1	0	0	0	2	1539.89			396684	10	22	Empty	true
Fed	Hemocyanin F chain	02750fasting_2_13777,19977fed_1_12930	Tityus2_.fasta	72.730,8	1	22	24	26	0.0176	0.53	ILDSIHLGTIIDDEGNEIPLDAQHGIDILGDLMESSEESKNR	R	D	0.997	151	25	151	13.9	1	0	0	0	2	4602.25			2489710	274	315	Empty	true
Fed	Hemocyanin F chain	02750fasting_2_13777,19977fed_1_12930	Tityus2_.fasta	72.730,8	1	22	24	26	0.0176	0.53	KSDESSVTISHVPTVEELKK	R	G	0.997	0	0	0	8.15	1	0	0	0	2	2213.17			1004100	499	518	Empty	true
Fed	Hemocyanin F chain	02750fasting_2_13777,19977fed_1_12930	Tityus2_.fasta	72.730,8	1	22	24	26	0.0176	0.53	MTPFHNFEEELEGYSPHLTSLISGLNYASR	R	P	0.997	167	37.7	167	21.4	1	0	0	0	1	3439.63			435326	221	250	Empty	true
Fed	Hemocyanin F chain	02750fasting_2_13777,19977fed_1_12930	Tityus2_.fasta	72.730,8	1	22	24	26	0.0176	0.53	MTPFHNFEEELEGYSPHLTSLISGLNYASRPSGLAMR	R	D	0.997	223	25	223	15.6	3	0	0	0	2	4152			1199530	221	257	Empty	true
Fed	Hemocyanin F chain	02750fasting_2_13777,19977fed_1_12930	Tityus2_.fasta	72.730,8	1	22	24	26	0.0176	0.53	NMSYTDVIIQFKEHVEQ	K	-	0.997	28.2	38.2	0	4.19	1	0	0	0	2	2081			177993	613	629	Empty	true
Fed	Hemocyanin F chain	02750fasting_2_13777,19977fed_1_12930	Tityus2_.fasta	72.730,8	1	22	24	26	0.0176	0.53	SDESSVTISHVPTVEELKK	K	G	0.997	64.1	25	64.1	4.07	1	0	0	0	2	2085.07			644104	500	518	Empty	true
Fed	Hemocyanin F chain	02750fasting_2_13777,19977fed_1_12930	Tityus2_.fasta	72.730,8	1	22	24	26	0.0176	0.53	TGPDSIYVEIK	R	E	0.997	108	28.1	99.2	5.74	1	0	0	0	2	1221.64			1144070	136	146	Empty	true
Fed	Hemocyanin F chain	02750fasting_2_13777,19977fed_1_12930	Tityus2_.fasta	72.730,8	1	22	24	26	0.0176	0.53	TIADFVTK	R	N	0.997	45.1	28.4	34.6	0.824	1	0	0	0	2	8944932			2002920	605	612	Empty	true
Fed	Hemocyanin F chain	02750fasting_2_13777,19977fed_1_12930	Tityus2_.fasta	72.730,8	1	22	24	26	0.0176	0.53	VPNVINTYIR	K	E	0.997	34.9	27.6	26.6	0.959	1	0	0	0	2	1188.67			301893	400	409	Empty	true
Fed	Hemocyanin F chain	02750fasting_2_13777,19977fed_1_12930	Tityus2_.fasta	72.730,8	1	22	24	26	0.0176	0.53	YDCDRLSVGLR	R	R	0.997	67.6	27	64.3	2.42	1	0	0	0	2	1353.66			755064	209	219	Empty	true
Fed	unknown protein	06548fasting_1_798	Tityus2_.fasta	23.163,4	0.98	1	1	1	0.000675	0.117	KFPDFEEFEAFSVNIEHTLPNQR	R	A	0.997	57.3	25	57.3	8.59	1	0	0	0	2	2794.35			145587	122	144	Empty	true
Fed	unknown protein	28337fed_3_28112,28338fed_3_28114	Tityus2_.fasta	5.796,5	1	5	7	7	0.00473	0.725	CKNPAESFIVELDK	K	C	0.997	64.5	26.5	64.5	7.82	2	0	0	0	2	1649.82			692806	17	30	Empty	true
Fed	unknown protein	28337fed_3_28112,28338fed_3_28114	Tityus2_.fasta	5.796,5	1	5	7	7	0.00473	0.725	CKNPAESFIVELDKCAIPCEPK	K	F	0.997	135	38	12.6	13	2	0	0	0	2	2588.22			1526340	17	38	Empty	true
Fed	unknown protein	28337fed_3_28112,28338fed_3_28114	Tityus2_.fasta	5.796,5	1	5	7	7	0.00473	0.725	DKCAIPCEPK	L	F	0.985	13.6	34.7	-2.05	0.959	1	0	0	0	1	1217.57			436661	29	38	Empty	true
Fed	unknown protein	28337fed_3_28112,28338fed_3_28114	Tityus2_.fasta	5.796,5	1	5	7	7	0.00473	0.725	GGESCEKVENNDVCK	M	C	0.997	64.6	34.9	6.81	0	1	0	0	0	1	1766.77			79.892,7	2	16	Empty	true
Fed	unknown protein	28337fed_3_28112,28338fed_3_28114	Tityus2_.fasta	5.796,5	1	5	7	7	0.00473	0.725	NPAESFIVELDKCAIPCEPK	K	F	0.997	134	25	134	13.1	1	0	0	0	2	2317.12			448472	19	38	Empty	true
Fed	unknown protein	23775fed_2_268	Tityus2_.fasta	31.465,8	1	2	2	2	0.00135	0.0787	IVYMGNVDTVR	R	S	0.997	60	27.5	57.5	1.31	1	0	0	0	2	1266.65			614915	160	170	Empty	true
Fed	unknown protein	23775fed_2_268	Tityus2_.fasta	31.465,8	1	2	2	2	0.00135	0.0787	YIYGPTALFK	R	S	0.982	35.5	28	31.3	0	1	0	0	0	2	1172.64			353447	138	147	Empty	true
Fed	Ovostatin	06147fasting_3_496	Tityus2_.fasta	22.287,3	0.98	1	1	1	0.000675	0.0615	IAIEYKQPAIAK	K	V	0.997	53.5	25	45.4	2.23	1	0	0	0	2	1344.79			385697	159	170	Empty	true	23683fed_3_2
Fed	Prominin-1	24092fed_3_519	Tityus2_.fasta	97.653,9	1	5	5	5	0.00338	0.07	EKPEYELELTQR	K	N	0.997	53.6	27.1	43.8	2.92	1	0	0	0	2	1534.77			293573	816	827	Empty	true
Fed	Prominin-1	24092fed_3_519	Tityus2_.fasta	97.653,9	1	5	5	5	0.00338	0.07	IGEILKDIGNIEK	K	S	0.997	85.2	25	68.8	4.19	1	0	0	0	2	1441.83			606607	654	666	Empty	true
Fed	Prominin-1	24092fed_3_519	Tityus2_.fasta	97.653,9	1	5	5	5	0.00338	0.07	LFDDIFPEAK	K	K	0.997	51	28.4	42.9	1.92	1	0	0	0	2	1194.6			333555	392	401	Empty	true
Fed	Prominin-1	24092fed_3_519	Tityus2_.fasta	97.653,9	1	5	5	5	0.00338	0.07	LNGIELFLTK	K	E	0.997	61.6	25.2	47.9	1.74	1	0	0	0	2	1147.67			251961	231	240	Empty	true
Fed	Prominin-1	24092fed_3_519	Tityus2_.fasta	97.653,9	1	5	5	5	0.00338	0.07	QINEQTKPLQNDMK	K	S	0.997	82.5	26.3	73.7	5.8	1	0	0	0	2	1686.85			896583	362	375	Empty	true
Fed	Hemocyanin F chain	10353fasting_2_29561	Tityus2_.fasta	71.568,2	1	9	9	10	0.00637	0.276	AMGFPFDR	R	V	0.997	49.8	27	43.3	1.74	1	0	0	0	2	9404346			468309	592	599	Empty	true	10961fasting_2_31159
Fed	Hemocyanin F chain	10353fasting_2_29561	Tityus2_.fasta	71.568,2	1	9	9	10	0.00637	0.276	ASLHSYDEHDLDFPGVHIEHVTVNAK	K	V	0.997	134	25	134	18.5	1	0	0	0	2	2930.41			475674	374	399	Empty	true
Fed	Hemocyanin F chain	10353fasting_2_29561	Tityus2_.fasta	71.568,2	1	9	9	10	0.00637	0.276	DATNSSVTISHVPTFDELKEGK	R	G	0.997	121	25	120	8.77	2	0	0	0	2	2375.17			978691	499	520	Empty	true
Fed	Hemocyanin F chain	10353fasting_2_29561	Tityus2_.fasta	71.568,2	1	9	9	10	0.00637	0.276	FVPAETINHALK	R	A	0.997	50.8	26	50.8	5.02	1	0	0	0	2	1339.74			857697	119	130	Empty	true
Fed	Hemocyanin F chain	10353fasting_2_29561	Tityus2_.fasta	71.568,2	1	9	9	10	0.00637	0.276	GLYIELDKFHK	R	E	0.997	38.9	26.9	38.9	0.959	1	0	0	0	2	1362.74			435435	477	487	Empty	true
Fed	Hemocyanin F chain	10353fasting_2_29561	Tityus2_.fasta	71.568,2	1	9	9	10	0.00637	0.276	GVTVPPIQEIFPDR	K	F	0.997	70.5	25.6	67.6	1.36	1	0	0	0	2	1567.85			890731	105	118	Empty	false	19977fed_1_12930,02750fasting_2_13777
Fed	Hemocyanin F chain	10353fasting_2_29561	Tityus2_.fasta	71.568,2	1	9	9	10	0.00637	0.276	IFLGPKYDELGNR	R	M	0.997	96.8	26.7	91.8	4.43	1	0	0	0	2	1521.81			800208	457	469	Empty	false	19977fed_1_12930,02750fasting_2_13777
Fed	Hemocyanin F chain	10353fasting_2_29561	Tityus2_.fasta	71.568,2	1	9	9	10	0.00637	0.276	ILPLFEHLTSLTAK	R	Q	0.997	72.5	25	59.3	5.72	1	0	0	0	2	1582.92			370710	10	23	Empty	true
Fed	Hemocyanin F chain	10353fasting_2_29561	Tityus2_.fasta	71.568,2	1	9	9	10	0.00637	0.276	LSTGLKRMTPFQ	R	N	0.997	0	0	0	2.28	1	0	0	0	1	1378.75			576151	214	225	Empty	true
Fed	Hemocyanin F chain	10353fasting_2_29561	Tityus2_.fasta	71.568,2	1	9	9	10	0.00637	0.276	VPDVITTTMKEDVLQLSHGIK	K	T	0.997	111	25	107	5.82	1	0	0	0	2	2324.25			464252	400	420	Empty	true
Fed	Hemocyanin F chain	10353fasting_2_29561	Tityus2_.fasta	71.568,2	1	9	9	10	0.00637	0.276	VQFEHLDHEPFSYSIEIQNK	K	S	0.997	65.2	25	65.2	8.64	1	0	0	0	2	2460.18			702174	427	446	Empty	true
Fed	unknown protein	06548fasting_1_798	Tityus2_.fasta	23.163,4	1	2	2	3	0.00191	0.183	AFSSVDMWVDNKR	R	Q	0.997	60.4	26.1	60.4	4.64	1	0	0	0	2	1554.74			628214	145	157	Empty	true
Fed	unknown protein	06548fasting_1_798	Tityus2_.fasta	23.163,4	1	2	2	3	0.00191	0.183	KFPDFEEFEAFSVNIEHTLPNQR	R	A	0.997	141	25	137	12	2	0	0	0	2	2794.35			366647	122	144	Empty	true
Fed	Homogentisate 1,2-dioxygenase	23688fed_1_201	Tityus2_.fasta	52.511,1	0.975	1	1	1	0.000637	0.0648	WLPFDIPNPQLENIDFVQGLNTICGAGESK	R	S	0.997	136	25	136	17.3	1	0	0	0	2	3372.66			117928	98	127	Empty	true
Fed	Uncharacterized protein C3H1.02c	06551fasting_2_800	Tityus2_.fasta	116.414,4	0.975	1	1	1	0.000637	0.00794	FYLPLFVR	R	L	0.997	46	25.4	31.5	0.854	1	0	0	0	2	1054.61			233647	574	581	Empty	true
Fed	Myosin heavy chain, muscle	01027fasting_2_11482,25375fed_1_21866	Tityus2_.fasta	226.839,1	1	5	5	6	0.00382	0.028	EKEMASLAAKLEDEQSLVAK	K	L	0.997	112	38.6	0	11.8	2	0	0	0	2	2174.14			1350140	1081	1100	Empty	true
Fed	Myosin heavy chain, muscle	01027fasting_2_11482,25375fed_1_21866	Tityus2_.fasta	226.839,1	1	5	5	6	0.00382	0.028	IEELEEELEAER	R	Q	0.997	74.5	37.8	16.5	0	1	0	0	0	2	1474.69			1249540	1112	1123	Empty	true	03841fasting_3_15996,20301fed_2_13529
Fed	Myosin heavy chain, muscle	01027fasting_2_11482,25375fed_1_21866	Tityus2_.fasta	226.839,1	1	5	5	6	0.00382	0.028	IEELEEELEAERQAR	R	A	0.993	54.7	39.2	0	0	1	0	0	0	2	1829.89			598268	1112	1126	Empty	true
Fed	Myosin heavy chain, muscle	01027fasting_2_11482,25375fed_1_21866	Tityus2_.fasta	226.839,1	1	5	5	6	0.00382	0.028	LEDEQSLVAK	K	L	0.997	65	28.9	52.8	1.74	1	0	0	0	2	1131.59			183313	1091	1100	Empty	true	03841fasting_3_15996
Fed	Myosin heavy chain, muscle	01027fasting_2_11482,25375fed_1_21866	Tityus2_.fasta	226.839,1	1	5	5	6	0.00382	0.028	NLNDEIAHQDELINKFNKEK	R	K	0.997	84.9	39.3	82.8	0	1	0	0	0	2	2378.23			924640	974	993	Empty	true
Fed	Zinc finger CCCH-type with G patch domain-containing protein	02385fasting_2_13173	Tityus2_.fasta	59.777,7	0.897	1	1	2	0.00127	0.0135	KDLLTLK	R	S	0.988	69.8	29.5	27.1	1.62	2	0	0	0	2	8305348			2516660	44	50	Empty	true
Fed	Catalase	06540fasting_3_79	Tityus2_.fasta	62.484,5	1	2	2	2	0.00127	0.0718	AAELSGSDPDYSIRDLYNAIR	K	S	0.997	84.7	25	84.7	3.51	1	0	0	0	2	2326.13			256222	283	303	Empty	true	24000fed_2_451
Fed	Catalase	06540fasting_3_79	Tityus2_.fasta	62.484,5	1	2	2	2	0.00127	0.0718	FSTVGGESGSADTVRDPR	R	G	0.997	41.3	25	28.8	1.62	1	0	0	0	2	1837.87			848660	109	126	Empty	true
Fed	unknown protein	06549fasting_1_798	Tityus2_.fasta	42.296,1	0.975	1	1	1	0.000637	0.0535	LDLNHFFGGNTPFIYIGEAK	K	K	0.997	78.2	25	78.2	7.29	1	0	0	0	2	2253.13			524520	20	39	Empty	true
Fed	Hemocyanin B chain	10939fasting_3_31133	Tityus2_.fasta	73.668,1	1	13	14	14	0.00892	0.314	DFVNEGLYIYAVAVAILHR	R	K	0.997	136	25	136	10.3	1	0	0	0	2	2163.16			116159	85	103	Empty	true
Fed	Hemocyanin B chain	10939fasting_3_31133	Tityus2_.fasta	73.668,1	1	13	14	14	0.00892	0.314	EVSVQEMER	K	W	0.997	41.2	27.3	32.3	0.921	1	0	0	0	2	1106.51			359368	264	272	Empty	true
Fed	Hemocyanin B chain	10939fasting_3_31133	Tityus2_.fasta	73.668,1	1	13	14	14	0.00892	0.314	FIDDMFQEYKK	R	T	0.997	91.9	26.6	90.2	6	1	0	0	0	2	1463.69			621540	367	377	Empty	true
Fed	Hemocyanin B chain	10939fasting_3_31133	Tityus2_.fasta	73.668,1	1	13	14	14	0.00892	0.314	FVPIETLLK	K	A	0.997	49.2	25.3	40.6	2.77	1	0	0	0	2	1059.64			1055630	122	130	Empty	true
Fed	Hemocyanin B chain	10939fasting_3_31133	Tityus2_.fasta	73.668,1	1	13	14	14	0.00892	0.314	GMPFHLFVILTDFTQDFVPDHSHR	K	S	0.997	85.3	25	85.3	9.7	1	0	0	0	2	2872.39			275073	551	574	Empty	true
Fed	Hemocyanin B chain	10939fasting_3_31133	Tityus2_.fasta	73.668,1	1	13	14	14	0.00892	0.314	HVTLPPIQEIFPEK	R	F	0.997	62.9	25	62.1	7.72	1	0	0	0	2	1647.91			221928	108	121	Empty	true
Fed	Hemocyanin B chain	10939fasting_3_31133	Tityus2_.fasta	73.668,1	1	13	14	14	0.00892	0.314	IFLAPKFDELGNEIEANELR	R	R	0.997	79.2	25	74.3	9.38	1	0	0	0	2	2318.2			285883	463	482	Empty	true
Fed	Hemocyanin B chain	10939fasting_3_31133	Tityus2_.fasta	73.668,1	1	13	14	14	0.00892	0.314	IFLAPKFDELGNEIEANELRR	R	L	0.997	0	0	0	6.43	1	0	0	0	2	2474.3			1445550	463	483	Empty	true
Fed	Hemocyanin B chain	10939fasting_3_31133	Tityus2_.fasta	73.668,1	1	13	14	14	0.00892	0.314	ILDSIHLATVIDKHGK	R	G	0.997	93.8	25	90.1	5.82	1	0	0	0	2	1760.01			299786	277	292	Empty	true
Fed	Hemocyanin B chain	10939fasting_3_31133	Tityus2_.fasta	73.668,1	1	13	14	14	0.00892	0.314	LASMHDDKEEVIVQSEK	K	T	0.997	107	25.2	96.2	11.9	2	0	0	0	2	1957.95			864704	134	150	Empty	true
Fed	Hemocyanin B chain	10939fasting_3_31133	Tityus2_.fasta	73.668,1	1	13	14	14	0.00892	0.314	LLPLFQYVPLLTK	R	E	0.997	69.5	25	68.2	4.8	1	0	0	0	2	1544.95			83.155,6	12	24	Empty	true
Fed	Hemocyanin B chain	10939fasting_3_31133	Tityus2_.fasta	73.668,1	1	13	14	14	0.00892	0.314	LMVELDKFSTELEPGVNTIEHSSR	R	D	0.997	171	25	171	11.4	1	0	0	0	2	2731.36			528037	484	507	Empty	true
Fed	Hemocyanin B chain	10939fasting_3_31133	Tityus2_.fasta	73.668,1	1	13	14	14	0.00892	0.314	YQTNPGVMSDTATSLRDPIFYR	R	W	0.997	66.9	25	66	5.96	1	0	0	0	2	2532.22			604328	342	363	Empty	true
Fed	Hemocyanin II	10999fasting_2_31207	Tityus2_.fasta	72.662,2	1	11	11	11	0.00701	0.347	ASTKPAGDESPIVVDVK	K	E	0.997	69	25.6	67.7	6.24	1	0	0	0	2	1712.91			956001	134	150	Empty	true
Fed	Hemocyanin II	10999fasting_2_31207	Tityus2_.fasta	72.662,2	1	11	11	11	0.00701	0.347	EQLSFPGVDVVDIR	K	V	0.997	84	26.4	72.3	5.24	1	0	0	0	2	1573.82			906555	386	399	Empty	true
Fed	Hemocyanin II	10999fasting_2_31207	Tityus2_.fasta	72.662,2	1	11	11	11	0.00701	0.347	EVALDEEHGADILGDLIESSYESK	K	N	0.997	85.2	25	85.2	5.74	1	0	0	0	2	2619.23			285588	294	317	Empty	true
Fed	Hemocyanin II	10999fasting_2_31207	Tityus2_.fasta	72.662,2	1	11	11	11	0.00701	0.347	FIDNIFQDYK	R	A	0.997	57.7	27.4	54.4	3.8	1	0	0	0	2	1302.64			293217	368	377	Empty	false	19977fed_1_12930,02750fasting_2_13777
Fed	Hemocyanin II	10999fasting_2_31207	Tityus2_.fasta	72.662,2	1	11	11	11	0.00701	0.347	FVPAATMAEILSK	R	A	0.997	93.8	27.4	86	4.39	1	0	0	0	2	1377.74			580076	121	133	Empty	true
Fed	Hemocyanin II	10999fasting_2_31207	Tityus2_.fasta	72.662,2	1	11	11	11	0.00701	0.347	GLSVPPIQQIFPER	K	F	0.997	68.5	25	50.7	3.12	1	0	0	0	2	1580.88			461618	107	120	Empty	true
Fed	Hemocyanin II	10999fasting_2_31207	Tityus2_.fasta	72.662,2	1	11	11	11	0.00701	0.347	HLSLATVGGEVPHEQR	K	D	0.997	49.5	25.4	44.6	8.74	1	0	0	0	2	1729.9			1284480	16	31	Empty	true
Fed	Hemocyanin II	10999fasting_2_31207	Tityus2_.fasta	72.662,2	1	11	11	11	0.00701	0.347	HLYEVFYEAKDFDDFVHLAQEAR	R	T	0.997	182	25	182	24.7	1	0	0	0	2	2842.35			338864	61	83	Empty	true
Fed	Hemocyanin II	10999fasting_2_31207	Tityus2_.fasta	72.662,2	1	11	11	11	0.00701	0.347	IIDAIHLGHIEDAHGK	R	E	0.997	71.1	25	70.7	3.48	1	0	0	0	2	1738.92			239086	278	293	Empty	true
Fed	Hemocyanin II	10999fasting_2_31207	Tityus2_.fasta	72.662,2	1	11	11	11	0.00701	0.347	LADLAFSVHPGEIFSCFHPDHLEDAR	R	H	0.997	143	25	143	10.7	1	0	0	0	2	2980.4			399562	35	60	Empty	true
Fed	Hemocyanin II	10999fasting_2_31207	Tityus2_.fasta	72.662,2	1	11	11	11	0.00701	0.347	LCIEMDKFKTELTPGTNTVVR	R	N	0.997	17.1	39.7	0	2.39	1	0	0	0	2	2452.29			101666	484	504	Empty	true
Fed	Hemocyanin II	10999fasting_2_31207	Tityus2_.fasta	72.662,2	1	11	11	11	0.00701	0.347	MVPFHNFDEELEGYAPHLSHLSSGR	R	Y	0.997	89.2	25	89.2	8.15	1	0	0	0	2	2869.34			421109	225	249	Empty	true
Fed	unknown protein	06266fasting_2_577,21059fed_3_15073	Tityus2_.fasta	16.893,8	0.975	1	1	1	0.000637	0.0537	VIFDYLLK	K	V	0.997	37.5	25	29.1	0.77	1	0	0	0	2	1010.59			295273	131	138	Empty	true
Fed	Ras GTPase-activating protein 3	17523fed_1_10020	Tityus2_.fasta	95.851,0	0.993	1	1	1	0.000637	0.00839	KIVSFLK	R	A	0.988	45	25	0	1.59	1	0	0	0	2	8345448			2997490	347	353	Empty	true
Fed	Focal adhesion kinase 1	26084fed_1_23351	Tityus2_.fasta	119.288,9	0.975	1	1	1	0.000637	0.0125	NDSPITKYSSIPR	R	K	0.997	32.3	25.9	32.3	2.05	1	0	0	0	2	1477.76			533042	327	339	Empty	true
Fed	Calreticulin	23666fed_2_19	Tityus2_.fasta	43.288,8	0.975	1	1	1	0.000637	0.0403	FIDIAAFGFDLWQVK	R	S	0.997	86.3	25.6	85.4	9.68	1	0	0	0	2	1769.93			83.667,3	271	285	Empty	true
Fed	Glycogen debranching enzyme	17971fed_2_10460	Tityus2_.fasta	176.900,0	0.979	1	1	1	0.000637	0.00515	LGISSLIR	R	E	0.997	52	28.2	32.6	1.24	1	0	0	0	2	8585408			542001	585	592	Empty	true
Fed	Myelin expression factor 2	27015fed_2_25323	Tityus2_.fasta	47.590,9	0.975	1	1	1	0.000637	0.0224	VISIELKTDK	K	E	0.997	42.7	25.5	29.8	0.854	1	0	0	0	2	1145.68			2771380	236	245	Empty	true
Fed	Calcium-transporting ATPase sarcoplasmic-endoplasmic reticulum type	26540fed_2_24694	Tityus2_.fasta	109.900,1	0.975	1	1	1	0.000637	0.00799	EFTLEFSR	K	D	0.997	44.3	26.8	28.1	1.96	1	0	0	0	2	1028.5			391507	483	490	Empty	true	02437fasting_3_13258
Fed	Myosin heavy chain, muscle	03841fasting_3_15996	Tityus2_.fasta	51.572,1	1	4	4	5	0.00318	0.224	ADLAREIDELSERLEEAGGATSAQIDLNK	R	R	0.991	68.1	38.8	0	0	1	0	0	0	2	3128.57			331261	134	162	Empty	false	20301fed_2_13529
Fed	Myosin heavy chain, muscle	03841fasting_3_15996	Tityus2_.fasta	51.572,1	1	4	4	5	0.00318	0.224	AKLEQTLDELEDSLER	K	E	0.997	56.3	25.6	56	6.44	1	0	0	0	2	1888.95			494086	22	37	Empty	true
Fed	Myosin heavy chain, muscle	03841fasting_3_15996	Tityus2_.fasta	51.572,1	1	4	4	5	0.00318	0.224	AKLEQTLDELEDSLEREK	K	K	0.997	0	0	0	8.96	2	0	0	0	2	2146.09			524307	22	39	Empty	true
Fed	Myosin heavy chain, muscle	03841fasting_3_15996	Tityus2_.fasta	51.572,1	1	4	4	5	0.00318	0.224	AKLEQTLDELEDSLEREKK	K	L	0.997	0	0	0	9.15	1	0	0	0	2	2274.18			353802	22	40	Empty	true
Fed	Myosin heavy chain, muscle	03841fasting_3_15996	Tityus2_.fasta	51.572,1	1	4	4	5	0.00318	0.224	IEELEEELEAER	R	Q	0.997	74.5	37.8	16.5	0	1	0	0	0	2	1474.69			1249540	112	123	Empty	false	20301fed_2_13529,01027fasting_2_11482,25375fed_1_21866
Fed	Myosin heavy chain, muscle	03841fasting_3_15996	Tityus2_.fasta	51.572,1	1	4	4	5	0.00318	0.224	LEDEQSLVAK	K	L	0.997	65	28.9	52.8	1.74	1	0	0	0	2	1131.59			183313	91	100	Empty	false	01027fasting_2_11482,25375fed_1_21866
Fed	Myosin heavy chain, muscle	03841fasting_3_15996	Tityus2_.fasta	51.572,1	1	4	4	5	0.00318	0.224	QLEDAESQVSQLSK	R	L	0.997	84.4	39.1	0	0	1	0	0	0	2	1575.79			2876510	287	300	Empty	false	20301fed_2_13529
Fed	Myosin heavy chain, muscle	03841fasting_3_15996	Tityus2_.fasta	51.572,1	1	4	4	5	0.00318	0.224	TGEDLQAVEDKVNHLNK	K	V	0.997	21.8	25.4	21.6	0.921	1	0	0	0	2	1909.96			1622820	3	19	Empty	true
Fed	unknown protein	06268fasting_2_579,23287fed_3_20624	Tityus2_.fasta	33.500,7	1	2	2	2	0.00127	0.0882	IDMENVVLSMQEVKVEAFK	K	Q	0.997	88	25	88	8.6	1	0	0	0	2	2209.12			155711	231	249	Empty	true
Fed	unknown protein	06268fasting_2_579,23287fed_3_20624	Tityus2_.fasta	33.500,7	1	2	2	2	0.00127	0.0882	LDAAIQFK	K	I	0.997	54.7	29.4	44.5	1.77	1	0	0	0	2	9055092			672284	118	125	Empty	true
Fed	Tumor necrosis factor alpha-induced protein 8-like protein	16039fasting_1_5834	Tityus2_.fasta	21.541,8	0.975	1	1	1	0.000637	0.0479	SLLKDLVVR	R	H	0.997	59.4	25.7	46	0.796	1	0	0	0	2	1042.66			524674	127	135	Empty	true
Fed	Alpha-2-macroglobulin	23681fed_1_2	Tityus2_.fasta	88.588,8	0.975	1	1	1	0.000637	0.034	FSLTQWFSATGHNLQIEPVSSAVECGK	R	L	0.997	208	25	208	18.4	1	0	0	0	2	2993.45			304346	61	87	Empty	true
Fed	Filamin-A	06594fasting_3_840	Tityus2_.fasta	237.867,5	1	37	39	41	0.0261	0.264	AFGPGLEHGIVNQVNTFTVETK	K	G	0.997	62.3	25	62.3	5.89	1	0	0	0	2	2358.21			490568	940	961	Empty	true
Fed	Filamin-A	06594fasting_3_840	Tityus2_.fasta	237.867,5	1	37	39	41	0.0261	0.264	AGGNAPLNVTIADEEYRPVDLK	K	I	0.997	90.9	25	90.9	5.43	1	0	0	0	2	2342.2			1854220	674	695	Empty	true
Fed	Filamin-A	06594fasting_3_840	Tityus2_.fasta	237.867,5	1	37	39	41	0.0261	0.264	AGVPLSFTVDAK	R	K	0.997	76.6	28.2	72.8	2.3	1	0	0	0	2	1204.66			961408	1045	1056	Empty	true
Fed	Filamin-A	06594fasting_3_840	Tityus2_.fasta	237.867,5	1	37	39	41	0.0261	0.264	AQTPTHFNIDCR	K	D	0.997	93.2	25	93.2	4.68	1	0	0	0	2	1459.67			1555340	758	769	Empty	true
Fed	Filamin-A	06594fasting_3_840	Tityus2_.fasta	237.867,5	1	37	39	41	0.0261	0.264	AVGALVDAVAPGLCPDWPDWTPANALK	R	N	0.997	97.9	25	97.9	14.7	1	0	0	0	2	2804.41			347895	171	197	Empty	true
Fed	Filamin-A	06594fasting_3_840	Tityus2_.fasta	237.867,5	1	37	39	41	0.0261	0.264	DAGFAEPEVAIKGPDGRPCK	K	T	0.997	106	25	106	5.64	2	0	0	0	2	2114.03			1135960	1156	1175	Empty	true
Fed	Filamin-A	06594fasting_3_840	Tityus2_.fasta	237.867,5	1	37	39	41	0.0261	0.264	EIPNSPIKVTVGSK	K	V	0.997	60.4	25	58.3	1.55	1	0	0	0	2	1468.84			849226	822	835	Empty	true
Fed	Filamin-A	06594fasting_3_840	Tityus2_.fasta	237.867,5	1	37	39	41	0.0261	0.264	FADQHIPGSPFKIPVTQDVDASK	K	V	0.997	78.4	25	78.4	11.5	1	0	0	0	2	2497.27			803542	1008	1030	Empty	true
Fed	Filamin-A	06594fasting_3_840	Tityus2_.fasta	237.867,5	1	37	39	41	0.0261	0.264	FGGQPIPGGQFTVNAVTEEVHK	K	K	0.997	68.5	25	68.5	9.85	1	0	0	0	2	2312.17			783638	1301	1322	Empty	true
Fed	Filamin-A	06594fasting_3_840	Tityus2_.fasta	237.867,5	1	37	39	41	0.0261	0.264	FLEDDEGIK	K	I	0.997	49.6	28.3	27.4	1.96	1	0	0	0	2	1065.51			692954	86	94	Empty	true
Fed	Filamin-A	06594fasting_3_840	Tityus2_.fasta	237.867,5	1	37	39	41	0.0261	0.264	GAGSGGLGLAIEGPSEAK	K	M	0.997	123	27.1	123	9.96	1	0	0	0	2	1570.81			1047470	962	979	Empty	true
Fed	Filamin-A	06594fasting_3_840	Tityus2_.fasta	237.867,5	1	37	39	41	0.0261	0.264	GQPVPVEIK	K	F	0.997	12.5	25.5	12.5	0.921	1	0	0	0	2	9665620			901958	299	307	Empty	true
Fed	Filamin-A	06594fasting_3_840	Tityus2_.fasta	237.867,5	1	37	39	41	0.0261	0.264	GVPASIPVEFTIDAK	K	D	0.997	53.8	25.9	53.2	3.34	1	0	0	0	2	1543.84			705206	1141	1155	Empty	true
Fed	Filamin-A	06594fasting_3_840	Tityus2_.fasta	237.867,5	1	37	39	41	0.0261	0.264	IADDVHRCEYVAQTVGVHSVNVFFAGQQIPNSPFGVK	K	V	0.997	103	25	103	9.16	1	0	0	0	2	4086.03			378274	411	447	Empty	true
Fed	Filamin-A	06594fasting_3_840	Tityus2_.fasta	237.867,5	1	37	39	41	0.0261	0.264	ICYTPFEEGRHTIDISYDGVPVPGSPFK	R	V	0.997	13.6	25	13.6	1.85	1	0	0	0	2	3181.53			622957	899	926	Empty	true
Fed	Filamin-A	06594fasting_3_840	Tityus2_.fasta	237.867,5	1	37	39	41	0.0261	0.264	IECNDLGDGSADVK	K	Y	0.997	118	25	118	4.92	1	0	0	0	2	1492.66			505923	594	607	Empty	true
Fed	Filamin-A	06594fasting_3_840	Tityus2_.fasta	237.867,5	1	37	39	41	0.0261	0.264	IKVDGLEPSVFLDSPTDFIVDAR	K	A	0.997	88.4	25	86	5.74	1	0	0	0	2	2533.32			341374	841	863	Empty	true
Fed	Filamin-A	06594fasting_3_840	Tityus2_.fasta	237.867,5	1	37	39	41	0.0261	0.264	IVNNNDGTYKVTYVPDDVGPYNISVK	K	Y	0.997	158	25	158	13.3	1	0	0	0	2	2884.44			743597	1178	1203	Empty	true
Fed	Filamin-A	06594fasting_3_840	Tityus2_.fasta	237.867,5	1	37	39	41	0.0261	0.264	KAGGNAPLNVTIADEEYRPVDLK	R	I	0.997	86.1	25	86.1	8.31	1	0	0	0	2	2470.29			762083	673	695	Empty	true
Fed	Filamin-A	06594fasting_3_840	Tityus2_.fasta	237.867,5	1	37	39	41	0.0261	0.264	KIADDVHRCEYVAQTVGVHSVN	R	V	0.988	0	0	0	0.886	1	0	0	0	1	2497.23			2651980	410	431	Empty	true
Fed	Filamin-A	06594fasting_3_840	Tityus2_.fasta	237.867,5	1	37	39	41	0.0261	0.264	KIDDTTYECIYRPMKEGR	R	Y	0.997	0	0	0	5.35	1	0	0	0	2	2275.08			826683	507	524	Empty	true
Fed	Filamin-A	06594fasting_3_840	Tityus2_.fasta	237.867,5	1	37	39	41	0.0261	0.264	LENVSVALK	K	F	0.997	68.9	28.1	33.6	2.07	1	0	0	0	2	9725724			1257810	77	85	Empty	true
Fed	Filamin-A	06594fasting_3_840	Tityus2_.fasta	237.867,5	1	37	39	41	0.0261	0.264	LIALVEVLSGK	R	K	0.997	70.6	25	63.8	0	1	0	0	0	2	1141.72			603069	51	61	Empty	true
Fed	Filamin-A	06594fasting_3_840	Tityus2_.fasta	237.867,5	1	37	39	41	0.0261	0.264	LIALVEVLSGKK	R	L	0.997	89	25	80.4	1.96	1	0	0	0	2	1269.81			309435	51	62	Empty	true
Fed	Filamin-A	06594fasting_3_840	Tityus2_.fasta	237.867,5	1	37	39	41	0.0261	0.264	LPDVPINNFTSDWNDGR	K	A	0.997	125	25	125	9.38	2	0	0	0	2	1959.92			1486370	154	170	Empty	true
Fed	Filamin-A	06594fasting_3_840	Tityus2_.fasta	237.867,5	1	37	39	41	0.0261	0.264	LPVAPGEYKIMVK	Y	F	0.997	12.9	37.4	1.84	3.68	1	0	0	0	1	1444.82			168058	1474	1486	Empty	true
Fed	Filamin-A	06594fasting_3_840	Tityus2_.fasta	237.867,5	1	37	39	41	0.0261	0.264	NINNLETDLADGLR	K	L	0.997	93.2	26.6	91.6	2.31	1	0	0	0	2	1557.79			942808	37	50	Empty	true
Fed	Filamin-A	06594fasting_3_840	Tityus2_.fasta	237.867,5	1	37	39	41	0.0261	0.264	SPFEVNVGPFKDSK	R	I	0.997	51.1	26.7	48.3	5.92	1	0	0	0	2	1550.79			697690	539	552	Empty	true
Fed	Filamin-A	06594fasting_3_840	Tityus2_.fasta	237.867,5	1	37	39	41	0.0261	0.264	TDSLVHSLNDGTYR	R	I	0.997	105	25.9	103	5.03	1	0	0	0	2	1577.76			1757190	885	898	Empty	true
Fed	Filamin-A	06594fasting_3_840	Tityus2_.fasta	237.867,5	1	37	39	41	0.0261	0.264	TDYFPEKVEAYGPGLQK	K	T	0.997	88.2	25.5	88.2	7.08	1	0	0	0	2	1941.96			3048620	640	656	Empty	true
Fed	Filamin-A	06594fasting_3_840	Tityus2_.fasta	237.867,5	1	37	39	41	0.0261	0.264	VFTENAGDGVLNVK	K	V	0.997	119	27.3	111	5.74	1	0	0	0	2	1462.75			1468690	479	492	Empty	true
Fed	Filamin-A	06594fasting_3_840	Tityus2_.fasta	237.867,5	1	37	39	41	0.0261	0.264	VIGPGGAPEHVDVR	K	K	0.997	64.1	27.6	64.1	1.92	1	0	0	0	2	1402.74			1454740	493	506	Empty	true
Fed	Filamin-A	06594fasting_3_840	Tityus2_.fasta	237.867,5	1	37	39	41	0.0261	0.264	VKVFGPGVEK	K	G	0.997	42	27.1	23.5	1.19	1	0	0	0	2	1059.62			572250	745	754	Empty	true
Fed	Filamin-A	06594fasting_3_840	Tityus2_.fasta	237.867,5	1	37	39	41	0.0261	0.264	VQVSEPTDAGKVK	R	V	0.997	72.7	27	58.6	4.04	1	0	0	0	2	1357.73			107456	734	746	Empty	true
Fed	Filamin-A	06594fasting_3_840	Tityus2_.fasta	237.867,5	1	37	39	41	0.0261	0.264	VTASGPGLEPTGVMIGRPTYFDIFTK	K	D	0.997	106	25	106	6.89	2	0	0	0	2	2754.42			1067100	358	383	Empty	true
Fed	Filamin-A	06594fasting_3_840	Tityus2_.fasta	237.867,5	1	37	39	41	0.0261	0.264	VVVENPKGQPVPVEIK	K	F	0.997	58.2	25	58.2	2.05	1	0	0	0	2	1732			1556190	292	307	Empty	true
Fed	Filamin-A	06594fasting_3_840	Tityus2_.fasta	237.867,5	1	37	39	41	0.0261	0.264	YGGKDIPGSPFQMK	K	V	0.997	36.7	26.7	36.7	3	2	0	0	0	2	1540.75			1128030	1107	1120	Empty	true
Fed	Phosphoribosylformylglycinamidine synthase	00735fasting_3_11189,24419fed_1_79	Tityus2_.fasta	145.611,0	1	12	12	13	0.00828	0.158	ESHRPSSFITHSGVR	K	H	0.997	63.2	25.8	62.5	2.6	2	0	0	0	2	1696.85			493541	293	307	Empty	true
Fed	Phosphoribosylformylglycinamidine synthase	00735fasting_3_11189,24419fed_1_79	Tityus2_.fasta	145.611,0	1	12	12	13	0.00828	0.158	FGEPVILGFAR	K	S	0.997	81.8	27.7	80.4	6	1	0	0	0	2	1205.67			521093	401	411	Empty	true
Fed	Phosphoribosylformylglycinamidine synthase	00735fasting_3_11189,24419fed_1_79	Tityus2_.fasta	145.611,0	1	12	12	13	0.00828	0.158	GLLDPAAGAR	K	M	0.977	34.4	26.8	23.5	0	1	0	0	0	2	9405212			589571	723	732	Empty	true
Fed	Phosphoribosylformylglycinamidine synthase	00735fasting_3_11189,24419fed_1_79	Tityus2_.fasta	145.611,0	1	12	12	13	0.00828	0.158	GMEDSILGVWVAHGEGR	R	F	0.997	123	25	123	6.96	1	0	0	0	2	1812.87			269867	1203	1219	Empty	true
Fed	Phosphoribosylformylglycinamidine synthase	00735fasting_3_11189,24419fed_1_79	Tityus2_.fasta	145.611,0	1	12	12	13	0.00828	0.158	GWAAGLLFHRELEEQFNAFYNR	R	S	0.997	37.6	25	37.6	4.44	1	0	0	0	2	2668.31			108574	1118	1139	Empty	true
Fed	Phosphoribosylformylglycinamidine synthase	00735fasting_3_11189,24419fed_1_79	Tityus2_.fasta	145.611,0	1	12	12	13	0.00828	0.158	HLAMMPHPER	R	C	0.997	71.1	26.9	61.8	5.59	1	0	0	0	2	1218.59			325423	1273	1282	Empty	true
Fed	Phosphoribosylformylglycinamidine synthase	00735fasting_3_11189,24419fed_1_79	Tityus2_.fasta	145.611,0	1	12	12	13	0.00828	0.158	IGVGGGSASSVHVQGDQK	R	A	0.997	127	26.3	124	6.59	1	0	0	0	2	1682.85			466123	464	481	Empty	true
Fed	Phosphoribosylformylglycinamidine synthase	00735fasting_3_11189,24419fed_1_79	Tityus2_.fasta	145.611,0	1	12	12	13	0.00828	0.158	LGGSALAQCFNQLGDNTADLDSPELLR	R	T	0.997	99.5	25	99.5	18.6	1	0	0	0	2	2875.39			210407	854	880	Empty	true
Fed	Phosphoribosylformylglycinamidine synthase	00735fasting_3_11189,24419fed_1_79	Tityus2_.fasta	145.611,0	1	12	12	13	0.00828	0.158	MSVAEAVTNLMFAPISSLKDAK	R	C	0.997	138	25	138	9.48	1	0	0	0	2	2323.2			447579	733	754	Empty	true
Fed	Phosphoribosylformylglycinamidine synthase	00735fasting_3_11189,24419fed_1_79	Tityus2_.fasta	145.611,0	1	12	12	13	0.00828	0.158	NPTTVECFDLAQSNSEHSR	R	H	0.997	152	35.6	22.1	0	1	0	0	0	2	2177.95			312571	218	236	Empty	true
Fed	Phosphoribosylformylglycinamidine synthase	00735fasting_3_11189,24419fed_1_79	Tityus2_.fasta	145.611,0	1	12	12	13	0.00828	0.158	RSIMMRGMEDSILGVWVAHGEGR	S	F	0.997	0	0	0	1.44	1	0	0	0	1	2587.27			543886	1197	1219	Empty	true
Fed	Phosphoribosylformylglycinamidine synthase	00735fasting_3_11189,24419fed_1_79	Tityus2_.fasta	145.611,0	1	12	12	13	0.00828	0.158	TVPCQYIGYSSGFANEAMVILNINNEVVLQNK	K	M	0.997	4.44	25	4.44	1.62	1	0	0	0	2	3585.77			392400	963	994	Empty	true
Fed	unknown protein	05978fasting_2_363	Tityus2_.fasta	75.890,9	1	8	8	8	0.0051	0.144	FTSLSLTK	K	G	0.997	43.9	26.7	23.5	1.06	1	0	0	0	2	8965088			821693	284	291	Empty	true
Fed	unknown protein	05978fasting_2_363	Tityus2_.fasta	75.890,9	1	8	8	8	0.0051	0.144	GAQILISDGNTR	K	F	0.997	51.5	27.9	23.6	1.7	1	0	0	0	2	1244.66			814504	292	303	Empty	true
Fed	unknown protein	05978fasting_2_363	Tityus2_.fasta	75.890,9	1	8	8	8	0.0051	0.144	ISLIPADGK	R	I	0.984	36.3	26.4	14.8	0	1	0	0	0	2	9135355			620061	332	340	Empty	true
Fed	unknown protein	05978fasting_2_363	Tityus2_.fasta	75.890,9	1	8	8	8	0.0051	0.144	SGFLLTTK	K	N	0.96	57.1	27.9	48.7	0	1	0	0	0	2	8664983			866818	533	540	Empty	true
Fed	unknown protein	05978fasting_2_363	Tityus2_.fasta	75.890,9	1	8	8	8	0.0051	0.144	SHSLGGYFQNEGK	R	I	0.997	45.6	25.9	45.6	2.28	1	0	0	0	2	1423.66			1101970	349	361	Empty	true
Fed	unknown protein	05978fasting_2_363	Tityus2_.fasta	75.890,9	1	8	8	8	0.0051	0.144	SLVLDITKLEDIPELYLTAK	K	S	0.997	159	25	159	9.11	1	0	0	0	2	2274.28			938327	513	532	Empty	true
Fed	unknown protein	05978fasting_2_363	Tityus2_.fasta	75.890,9	1	8	8	8	0.0051	0.144	TNLVLTISPNEK	K	G	0.997	58.5	26.4	57.2	4.05	1	0	0	0	2	1328.74			528198	211	222	Empty	true
Fed	unknown protein	05978fasting_2_363	Tityus2_.fasta	75.890,9	1	8	8	8	0.0051	0.144	TVTYSGNQAPFSLVVK	K	G	0.997	60.4	25.1	60.4	5.96	1	0	0	0	2	1710.91			259877	89	104	Empty	true
Fed	Calreticulin	06327fasting_1_621	Tityus2_.fasta	31.059,4	0.975	1	1	1	0.000637	0.0487	WIPSEHKGNELGK	R	F	0.997	40.2	26.7	36.7	1.42	1	0	0	0	2	1494.77			316164	36	48	Empty	true
Fed	23666fed_2_19-DECOY Calreticulin	23666fed_2_19-DECOY		0,0	0.975	1	1	1	0.000637	0	TSGWTEEGVK	K	Q	0.997	0	0	0	2.74	1	0	0	0	2	1093.52			932180	0	0	Empty	true
Fed	Hemocyanin F chain	02750fasting_2_13777,19977fed_1_12930	Tityus2_.fasta	72.730,8	1	31	34	42	0.0268	0.676	DDKYPDKKPMGFPFDR	K	T	0.997	22.4	38.6	-1.36	2.57	1	0	0	0	2	1955.97			1448920	584	599	Empty	true
Fed	Hemocyanin F chain	02750fasting_2_13777,19977fed_1_12930	Tityus2_.fasta	72.730,8	1	31	34	42	0.0268	0.676	DFNDFIHLCEQAR	K	D	0.997	68.8	25	68.4	2.92	1	0	0	0	2	1664.75			1067560	69	81	Empty	true
Fed	Hemocyanin F chain	02750fasting_2_13777,19977fed_1_12930	Tityus2_.fasta	72.730,8	1	31	34	42	0.0268	0.676	DLKEVAVQDMER	R	W	0.997	107	27	95.1	6.7	3	0	0	0	2	1432.71			3230830	258	269	Empty	true
Fed	Hemocyanin F chain	02750fasting_2_13777,19977fed_1_12930	Tityus2_.fasta	72.730,8	1	31	34	42	0.0268	0.676	DYYGSLHNWGHVMMAR	R	L	0.997	82.4	25	82.4	5.52	2	0	0	0	2	1936.86			885324	316	331	Empty	true
Fed	Hemocyanin F chain	02750fasting_2_13777,19977fed_1_12930	Tityus2_.fasta	72.730,8	1	31	34	42	0.0268	0.676	EELNFPEVEIVNATVNAK	K	V	0.997	31.5	25	31.5	3.96	1	0	0	0	2	2016.03			115219	382	399	Empty	true
Fed	Hemocyanin F chain	02750fasting_2_13777,19977fed_1_12930	Tityus2_.fasta	72.730,8	1	31	34	42	0.0268	0.676	ETGNILDPEYNLAYFR	K	E	0.997	71.2	25	67.5	5	1	0	0	0	2	1914.92			271660	147	162	Empty	true
Fed	Hemocyanin F chain	02750fasting_2_13777,19977fed_1_12930	Tityus2_.fasta	72.730,8	1	31	34	42	0.0268	0.676	ETGNILDPEYNLAYFREDVEVNAHHWHWHCVYPATWR	K	S	0.997	154	25	154	14.1	1	0	0	0	2	4625.13			445112	147	183	Empty	true
Fed	Hemocyanin F chain	02750fasting_2_13777,19977fed_1_12930	Tityus2_.fasta	72.730,8	1	31	34	42	0.0268	0.676	FHKELQPGKNTITR	K	K	0.997	0	0	0	1.55	1	0	0	0	2	1668.92			31.403,5	485	498	Empty	true
Fed	Hemocyanin F chain	02750fasting_2_13777,19977fed_1_12930	Tityus2_.fasta	72.730,8	1	31	34	42	0.0268	0.676	FIDNIFQDYK	R	D	0.997	57.7	27.4	54.4	3.8	1	0	0	0	2	1302.64			293217	364	373	Empty	true	10999fasting_2_31207
Fed	Hemocyanin F chain	02750fasting_2_13777,19977fed_1_12930	Tityus2_.fasta	72.730,8	1	31	34	42	0.0268	0.676	FIDNIFQDYKDTLPSYTK	R	E	0.997	97.8	25	94.9	6.15	1	0	0	0	2	2208.09			370228	364	381	Empty	true
Fed	Hemocyanin F chain	02750fasting_2_13777,19977fed_1_12930	Tityus2_.fasta	72.730,8	1	31	34	42	0.0268	0.676	FIPAETINAALK	R	A	0.997	47.4	26.1	36.1	1.96	1	0	0	0	2	1287.73			2925690	119	130	Empty	true
Fed	Hemocyanin F chain	02750fasting_2_13777,19977fed_1_12930	Tityus2_.fasta	72.730,8	1	31	34	42	0.0268	0.676	GEGLSEDNTEFCSCGWPQHMLLPR	K	G	0.997	201	25	201	18.1	1	0	0	0	2	2820.22			521237	519	542	Empty	true
Fed	Hemocyanin F chain	02750fasting_2_13777,19977fed_1_12930	Tityus2_.fasta	72.730,8	1	31	34	42	0.0268	0.676	GVTVPPIQEIFPDR	R	F	0.997	70.5	25.6	67.6	1.36	1	0	0	0	2	1567.85			890731	105	118	Empty	true	10353fasting_2_29561
Fed	Hemocyanin F chain	02750fasting_2_13777,19977fed_1_12930	Tityus2_.fasta	72.730,8	1	31	34	42	0.0268	0.676	GVTVPPIQEIFPDRFIPAETINAALK	R	A	0.997	31.9	25	18.9	1.89	1	0	0	0	2	2836.56			683164	105	130	Empty	true
Fed	Hemocyanin F chain	02750fasting_2_13777,19977fed_1_12930	Tityus2_.fasta	72.730,8	1	31	34	42	0.0268	0.676	GVTVPPIQEIFPDRFIPAETINAALKADLTR	R	T	0.997	0	0	0	2.57	1	0	0	0	2	3392.86			397165	105	135	Empty	true
Fed	Hemocyanin F chain	02750fasting_2_13777,19977fed_1_12930	Tityus2_.fasta	72.730,8	1	31	34	42	0.0268	0.676	HFFIELDKFHK	R	E	0.997	56	26.8	43	3.7	1	0	0	0	2	1460.77			893120	477	487	Empty	true
Fed	Hemocyanin F chain	02750fasting_2_13777,19977fed_1_12930	Tityus2_.fasta	72.730,8	1	31	34	42	0.0268	0.676	HFFIELDKFHKELQPGK	R	N	0.997	0	0	0	8.49	2	0	0	0	2	2113.12			1092670	477	493	Empty	true
Fed	Hemocyanin F chain	02750fasting_2_13777,19977fed_1_12930	Tityus2_.fasta	72.730,8	1	31	34	42	0.0268	0.676	IFLGPKYDELGNR	R	L	0.997	96.8	26.7	91.8	4.43	1	0	0	0	2	1521.81			800208	457	469	Empty	true	10353fasting_2_29561
Fed	Hemocyanin F chain	02750fasting_2_13777,19977fed_1_12930	Tityus2_.fasta	72.730,8	1	31	34	42	0.0268	0.676	IIPLFEHLTSLTR	R	K	0.997	68.7	25	63.7	0.796	4	0	0	0	2	1539.89			1301330	10	22	Empty	true
Fed	Hemocyanin F chain	02750fasting_2_13777,19977fed_1_12930	Tityus2_.fasta	72.730,8	1	31	34	42	0.0268	0.676	ILDSIHLGTIIDDEGNEIPLDAQHGIDILGDLMESSEESKNR	R	D	0.997	138	25	138	15.3	2	0	0	0	2	4602.25			1011050	274	315	Empty	true
Fed	Hemocyanin F chain	02750fasting_2_13777,19977fed_1_12930	Tityus2_.fasta	72.730,8	1	31	34	42	0.0268	0.676	KSDESSVTISHVPTVEELKK	R	G	0.997	0	0	0	15	1	0	0	0	2	2213.17			1640370	499	518	Empty	true
Fed	Hemocyanin F chain	02750fasting_2_13777,19977fed_1_12930	Tityus2_.fasta	72.730,8	1	31	34	42	0.0268	0.676	LFSCFHAEHLAEAQYLYETLYAAK	K	D	0.997	36.3	25	36.3	3.8	1	0	0	0	2	2875.38			143661	45	68	Empty	true
Fed	Hemocyanin F chain	02750fasting_2_13777,19977fed_1_12930	Tityus2_.fasta	72.730,8	1	31	34	42	0.0268	0.676	MTPFHNFEEELEGYSPHLTSLISGLNYASR	R	P	0.997	173	38.2	173	32.8	1	0	0	0	1	3439.63			379608	221	250	Empty	true
Fed	Hemocyanin F chain	02750fasting_2_13777,19977fed_1_12930	Tityus2_.fasta	72.730,8	1	31	34	42	0.0268	0.676	MTPFHNFEEELEGYSPHLTSLISGLNYASRPSGLAMR	R	D	0.997	247	25	247	23.5	4	0	0	0	2	4152			1558040	221	257	Empty	true
Fed	Hemocyanin F chain	02750fasting_2_13777,19977fed_1_12930	Tityus2_.fasta	72.730,8	1	31	34	42	0.0268	0.676	NMSYTDVIIQFKEHVEQ	K	-	0.997	67.9	38.7	0	5.8	1	0	0	0	2	2081			508945	613	629	Empty	true
Fed	Hemocyanin F chain	02750fasting_2_13777,19977fed_1_12930	Tityus2_.fasta	72.730,8	1	31	34	42	0.0268	0.676	SDESSVTISHVPTVEELKK	K	G	0.997	90.5	25	89.9	7.39	1	0	0	0	2	2085.07			1188860	500	518	Empty	true
Fed	Hemocyanin F chain	02750fasting_2_13777,19977fed_1_12930	Tityus2_.fasta	72.730,8	1	31	34	42	0.0268	0.676	TGPDSIYVEIK	R	E	0.997	89	28.1	83.9	4.41	1	0	0	0	2	1221.64			2520860	136	146	Empty	true
Fed	Hemocyanin F chain	02750fasting_2_13777,19977fed_1_12930	Tityus2_.fasta	72.730,8	1	31	34	42	0.0268	0.676	TIADFVTK	R	N	0.96	45.2	28.4	36.1	0	1	0	0	0	2	8944932			2097830	605	612	Empty	true
Fed	Hemocyanin F chain	02750fasting_2_13777,19977fed_1_12930	Tityus2_.fasta	72.730,8	1	31	34	42	0.0268	0.676	VPNVINTYIR	K	E	0.997	39.3	27.3	31.4	1.14	1	0	0	0	2	1188.67			1281450	400	409	Empty	true
Fed	Hemocyanin F chain	02750fasting_2_13777,19977fed_1_12930	Tityus2_.fasta	72.730,8	1	31	34	42	0.0268	0.676	VPNVINTYIREDALELSYGINLK	K	G	0.997	105	25	105	11.3	1	0	0	0	2	2634.41			284773	400	422	Empty	true
Fed	Hemocyanin F chain	02750fasting_2_13777,19977fed_1_12930	Tityus2_.fasta	72.730,8	1	31	34	42	0.0268	0.676	YDCDRLSVGLR	R	R	0.997	74.1	27	70.4	2.89	1	0	0	0	2	1353.66			1493350	209	219	Empty	true
Fed	Hemocyanin C chain	10961fasting_2_31159	Tityus2_.fasta	73.317,4	0.05	0	0	0	0	0.0126	AMGFPFDR	R	R	0.997	49.8	27	43.3	1.74	1	0	0	0	2	9404346			468309	602	609	Empty	false	10353fasting_2_29561
Fed	unknown protein	28337fed_3_28112,28338fed_3_28114	Tityus2_.fasta	5.796,5	1	3	5	5	0.00318	0.431	CKNPAESFIVELDK	K	C	0.997	64.5	26.5	64.5	11.4	2	0	0	0	2	1649.82			505803	17	30	Empty	true
Fed	unknown protein	28337fed_3_28112,28338fed_3_28114	Tityus2_.fasta	5.796,5	1	3	5	5	0.00318	0.431	CKNPAESFIVELDKCAIPCEPK	K	F	0.997	125	39.1	12	16.2	2	0	0	0	2	2588.22			968896	17	38	Empty	true
Fed	unknown protein	28337fed_3_28112,28338fed_3_28114	Tityus2_.fasta	5.796,5	1	3	5	5	0.00318	0.431	NPAESFIVELDKCAIPCEPK	K	F	0.997	159	25	159	12.5	1	0	0	0	2	2317.12			292595	19	38	Empty	true
Fed	MAM and LDL-receptor class A domain-containing protein C10orf112	23622fed_2_152	Tityus2_.fasta	580.276,3	1	6	6	6	0.00382	0.0155	IALISSTTFLPTFAK	R	D	0.997	67.2	25	57.1	4.62	1	0	0	0	2	1609.92			232581	3387	3401	Empty	true
Fed	MAM and LDL-receptor class A domain-containing protein C10orf112	23622fed_2_152	Tityus2_.fasta	580.276,3	1	6	6	6	0.00382	0.0155	IFEGEISNKNK	F	S	0.997	21.2	39.4	8.09	1.06	1	0	0	0	1	1278.67			4826590	1401	1411	Empty	true
Fed	MAM and LDL-receptor class A domain-containing protein C10orf112	23622fed_2_152	Tityus2_.fasta	580.276,3	1	6	6	6	0.00382	0.0155	LLSPFLTSK	R	N	0.981	44.2	35.3	23.2	0	1	0	0	0	2	1118.68			261045	2554	2562	Empty	true
Fed	MAM and LDL-receptor class A domain-containing protein C10orf112	23622fed_2_152	Tityus2_.fasta	580.276,3	1	6	6	6	0.00382	0.0155	NSYSSDGLELIYSYK	R	T	0.997	114	25.2	110	7.01	1	0	0	0	2	1738.82			151118	4304	4318	Empty	true
Fed	MAM and LDL-receptor class A domain-containing protein C10orf112	23622fed_2_152	Tityus2_.fasta	580.276,3	1	6	6	6	0.00382	0.0155	TLPSPFSVDASWLR	R	V	0.997	73	26.6	68.2	2.92	1	0	0	0	2	1575.82			169604	337	350	Empty	true
Fed	MAM and LDL-receptor class A domain-containing protein C10orf112	23622fed_2_152	Tityus2_.fasta	580.276,3	1	6	6	6	0.00382	0.0155	TTNSDDDKIITLWDR	K	S	0.997	108	25.6	106	8.8	1	0	0	0	2	1792.87			724037	4524	4538	Empty	true
Fed	Leukocyte elastase inhibitor	04196fasting_3_16784	Tityus2_.fasta	50.481,1	1	8	8	8	0.0051	0.218	FTLEYSR	K	K	0.988	30.2	27.6	14.7	3.96	1	0	0	0	2	9154570			590196	339	345	Empty	true
Fed	Leukocyte elastase inhibitor	04196fasting_3_16784	Tityus2_.fasta	50.481,1	1	8	8	8	0.0051	0.218	INTRFPFLDDYDR	K	K	0.997	91.2	25.9	86	4.06	1	0	0	0	2	1671.81			413289	269	281	Empty	true
Fed	Leukocyte elastase inhibitor	04196fasting_3_16784	Tityus2_.fasta	50.481,1	1	8	8	8	0.0051	0.218	ISPEVELK	R	S	0.997	52.3	28.1	33.6	1.64	1	0	0	0	2	9145194			514293	64	71	Empty	true
Fed	Leukocyte elastase inhibitor	04196fasting_3_16784	Tityus2_.fasta	50.481,1	1	8	8	8	0.0051	0.218	LKNEITDNIITTFLK	R	E	0.997	34.4	25	23.9	3.92	1	0	0	0	2	1763			430339	311	325	Empty	true
Fed	Leukocyte elastase inhibitor	04196fasting_3_16784	Tityus2_.fasta	50.481,1	1	8	8	8	0.0051	0.218	LKNEITDNIITTFLKELDVTR	R	V	0.997	0	0	0	7.66	1	0	0	0	2	2476.37			150142	311	331	Empty	true
Fed	Leukocyte elastase inhibitor	04196fasting_3_16784	Tityus2_.fasta	50.481,1	1	8	8	8	0.0051	0.218	SNALQELNSWVSEK	K	T	0.997	128	26.2	121	7.52	1	0	0	0	2	1604.79			288243	196	209	Empty	true
Fed	Leukocyte elastase inhibitor	04196fasting_3_16784	Tityus2_.fasta	50.481,1	1	8	8	8	0.0051	0.218	SVNNVIFGHGLFR	K	N	0.997	61.3	26.8	61	4.33	1	0	0	0	2	1459.78			532628	75	87	Empty	true
Fed	Leukocyte elastase inhibitor	04196fasting_3_16784	Tityus2_.fasta	50.481,1	1	8	8	8	0.0051	0.218	VLQLPYKGDDISMLLVLPYER	K	D	0.997	64.6	25	64.6	6.6	1	0	0	0	2	2478.33			160015	285	305	Empty	true
Fed	Lysosomal alpha-mannosidase	28760fed_2_1025	Tityus2_.fasta	110.307,3	1	4	4	5	0.00318	0.0439	EALGVAQHHDAISGTAK	R	Q	0.997	88.3	25.7	85.7	3.96	2	0	0	0	2	1704.87			791584	372	388	Empty	true
Fed	Lysosomal alpha-mannosidase	28760fed_2_1025	Tityus2_.fasta	110.307,3	1	4	4	5	0.00318	0.0439	IPVQLSGYR	R	V	0.997	54	28.2	39.3	1.03	1	0	0	0	2	1032.58			845549	466	474	Empty	true
Fed	Lysosomal alpha-mannosidase	28760fed_2_1025	Tityus2_.fasta	110.307,3	1	4	4	5	0.00318	0.0439	NVINIPGR	K	N	0.96	32.5	26.4	26.9	0	1	0	0	0	2	8825156			651307	493	500	Empty	true
Fed	Lysosomal alpha-mannosidase	28760fed_2_1025	Tityus2_.fasta	110.307,3	1	4	4	5	0.00318	0.0439	QLTILNDR	L	S	0.96	0	0	0	1.2	1	0	0	0	1	9555209			1789610	735	742	Empty	true
Fed	Spectrin beta chain	23944fed_2_40	Tityus2_.fasta	273.127,2	1	2	2	2	0.00127	0.0158	DAAVAEAWLVAQEPYLLS	R	Q	0.966	0	0	0	0.77	1	0	0	0	1	1945.99			2681160	2020	2037	Empty	true
Fed	Spectrin beta chain	23944fed_2_40	Tityus2_.fasta	273.127,2	1	2	2	2	0.00127	0.0158	IQQLEAAYSELVQLALDRR	R	N	0.997	51.7	25	51.7	3.39	1	0	0	0	2	2216.2			351361	608	626	Empty	true
Fed	Myosin heavy chain, muscle	16487fasting_2_6726	Tityus2_.fasta	11.681,5	0.998	1	1	1	0.000637	0.176	NLNDEIAHQDELINKLNK	R	-	0.997	138	25	138	6.8	1	0	0	0	2	2121.09			1268900	84	101	Empty	true
Fed	MAM and LDL-receptor class A domain-containing protein C10orf112	19500fed_1_12131	Tityus2_.fasta	73.429,4	1	2	2	2	0.00127	0.0282	DGWFAVLSGK	K	K	0.997	49.6	28.6	39.5	0	1	0	0	0	2	1079.55			110559	517	526	Empty	true
Fed	MAM and LDL-receptor class A domain-containing protein C10orf112	19500fed_1_12131	Tityus2_.fasta	73.429,4	1	2	2	2	0.00127	0.0282	FLYFFGER	K	N	0.997	44.6	28.6	36.9	1.29	1	0	0	0	2	1078.54			447224	297	304	Empty	true
Fed	Hemocyanin AA6 chain	04165fasting_1_16742,27819fed_3_26963	Tityus2_.fasta	71.668,1	1	26	27	32	0.0204	0.656	DAIYPDKKPMGFPFDRPIHVR	K	N	0.997	118	25	118	6.47	1	0	0	0	2	2499.3			747719	584	604	Empty	true
Fed	Hemocyanin AA6 chain	04165fasting_1_16742,27819fed_3_26963	Tityus2_.fasta	71.668,1	1	26	27	32	0.0204	0.656	DFDDFYLLAK	K	Q	0.997	41.7	26.9	41.7	1.82	1	0	0	0	2	1246.6			383753	69	78	Empty	true
Fed	Hemocyanin AA6 chain	04165fasting_1_16742,27819fed_3_26963	Tityus2_.fasta	71.668,1	1	26	27	32	0.0204	0.656	DLKDVDVQDMER	R	W	0.997	73.2	25.7	62.5	3.31	2	0	0	0	2	1462.68			2612880	257	268	Empty	true
Fed	Hemocyanin AA6 chain	04165fasting_1_16742,27819fed_3_26963	Tityus2_.fasta	71.668,1	1	26	27	32	0.0204	0.656	EANNNPNSDVVVEVEETGNILDPEYK	K	L	0.997	113	25	113	12.6	1	0	0	0	2	2888.34			224804	131	156	Empty	true
Fed	Hemocyanin AA6 chain	04165fasting_1_16742,27819fed_3_26963	Tityus2_.fasta	71.668,1	1	26	27	32	0.0204	0.656	ENPGVMSDTSTSLRDPIFYR	N	W	0.997	49.9	25	49.9	3.64	1	0	0	0	1	2285.09			1370740	340	359	Empty	true	10353fasting_2_29561,19977fed_1_12930,10337fasting_2_29538,02750fasting_2_13777,29086fed_2_1376
Fed	Hemocyanin AA6 chain	04165fasting_1_16742,27819fed_3_26963	Tityus2_.fasta	71.668,1	1	26	27	32	0.0204	0.656	EQIDFPGVEVTNVTVNAK	R	K	0.997	93	25	91.3	7.51	1	0	0	0	2	1960			625262	381	398	Empty	true
Fed	Hemocyanin AA6 chain	04165fasting_1_16742,27819fed_3_26963	Tityus2_.fasta	71.668,1	1	26	27	32	0.0204	0.656	FVDNIFQDYK	R	A	0.997	63.7	27.5	62.9	2.41	1	0	0	0	2	1288.62			1569250	363	372	Empty	true
Fed	Hemocyanin AA6 chain	04165fasting_1_16742,27819fed_3_26963	Tityus2_.fasta	71.668,1	1	26	27	32	0.0204	0.656	FVDNIFQDYKATLHPYTR	R	E	0.997	105	25	105	7.7	1	0	0	0	2	2228.11			568486	363	380	Empty	true
Fed	Hemocyanin AA6 chain	04165fasting_1_16742,27819fed_3_26963	Tityus2_.fasta	71.668,1	1	26	27	32	0.0204	0.656	FVPAETVNLAIK	R	E	0.997	72.1	26.2	63.7	2.68	1	0	0	0	2	1301.75			2932040	119	130	Empty	true
Fed	Hemocyanin AA6 chain	04165fasting_1_16742,27819fed_3_26963	Tityus2_.fasta	71.668,1	1	26	27	32	0.0204	0.656	GSLFSCFHAK	R	D	0.997	85.8	27.1	76.7	3.42	1	0	0	0	2	1153.55			826462	43	52	Empty	true
Fed	Hemocyanin AA6 chain	04165fasting_1_16742,27819fed_3_26963	Tityus2_.fasta	71.668,1	1	26	27	32	0.0204	0.656	GVTVPPIQEVFPDR	K	F	0.997	51.8	25.4	41.6	1.43	1	0	0	0	2	1553.83			595736	105	118	Empty	true
Fed	Hemocyanin AA6 chain	04165fasting_1_16742,27819fed_3_26963	Tityus2_.fasta	71.668,1	1	26	27	32	0.0204	0.656	GVTVPPIQEVFPDRFVPAETVNLAIK	K	E	0.997	86.1	25	57.7	6.37	1	0	0	0	2	2836.56			642090	105	130	Empty	true
Fed	Hemocyanin AA6 chain	04165fasting_1_16742,27819fed_3_26963	Tityus2_.fasta	71.668,1	1	26	27	32	0.0204	0.656	IFLGPKFDELGNVLDVNEQR	R	R	0.997	94.3	25	91	7.54	1	0	0	0	2	2303.2			737260	458	477	Empty	true
Fed	Hemocyanin AA6 chain	04165fasting_1_16742,27819fed_3_26963	Tityus2_.fasta	71.668,1	1	26	27	32	0.0204	0.656	IFLGPKFDELGNVLDVNEQRR	R	L	0.997	0	0	0	7.39	1	0	0	0	2	2459.3			569119	458	478	Empty	true
Fed	Hemocyanin AA6 chain	04165fasting_1_16742,27819fed_3_26963	Tityus2_.fasta	71.668,1	1	26	27	32	0.0204	0.656	ILDAIHLGHIHTSEDEEIALDEAHGADILGDIIESSAESR	R	N	0.997	130	25	130	14.1	3	0	0	0	2	4292.1			1226980	273	312	Empty	true
Fed	Hemocyanin AA6 chain	04165fasting_1_16742,27819fed_3_26963	Tityus2_.fasta	71.668,1	1	26	27	32	0.0204	0.656	ILSLFEHLTSLTEK	R	Q	0.997	119	25	103	6.19	2	0	0	0	2	1630.91			1510330	10	23	Empty	true
Fed	Hemocyanin AA6 chain	04165fasting_1_16742,27819fed_3_26963	Tityus2_.fasta	71.668,1	1	26	27	32	0.0204	0.656	KGEGISEDATEFCSCGWPEHMLIPR	K	G	0.997	99.7	25	99.7	8.11	1	0	0	0	2	2906.29			294762	519	543	Empty	true
Fed	Hemocyanin AA6 chain	04165fasting_1_16742,27819fed_3_26963	Tityus2_.fasta	71.668,1	1	26	27	32	0.0204	0.656	KNNTIHTFIKDEELELSHGIR	K	F	0.997	0	0	0	13.8	2	0	0	0	2	2494.31			990557	399	419	Empty	true
Fed	Hemocyanin AA6 chain	04165fasting_1_16742,27819fed_3_26963	Tityus2_.fasta	71.668,1	1	26	27	32	0.0204	0.656	LAGVGILKR	R	G	0.997	48.4	25	41	1.15	1	0	0	0	2	9266147			950616	34	42	Empty	true
Fed	Hemocyanin AA6 chain	04165fasting_1_16742,27819fed_3_26963	Tityus2_.fasta	71.668,1	1	26	27	32	0.0204	0.656	LLCQDAVSYCGAK	K	D	0.997	69.8	25	62.4	2.33	1	0	0	0	2	1484.69			1086710	571	583	Empty	true
Fed	Hemocyanin AA6 chain	04165fasting_1_16742,27819fed_3_26963	Tityus2_.fasta	71.668,1	1	26	27	32	0.0204	0.656	MIPFHNFDEKLEGYAPHLTSLISGLQYGSRPR	R	G	0.997	109	25	109	6.41	1	0	0	0	2	3673.86			260852	220	251	Empty	true
Fed	Hemocyanin AA6 chain	04165fasting_1_16742,27819fed_3_26963	Tityus2_.fasta	71.668,1	1	26	27	32	0.0204	0.656	NLQEFLTPNIHVTDIDIK	R	F	0.997	54.3	25	54.3	3.37	1	0	0	0	2	2110.12			367421	605	622	Empty	true
Fed	Hemocyanin AA6 chain	04165fasting_1_16742,27819fed_3_26963	Tityus2_.fasta	71.668,1	1	26	27	32	0.0204	0.656	NLQEFLTPNIHVTDIDIKFDG	R	-	0.997	105	25	105	9.46	1	0	0	0	2	2429.24			793254	605	625	Empty	true
Fed	Hemocyanin AA6 chain	04165fasting_1_16742,27819fed_3_26963	Tityus2_.fasta	71.668,1	1	26	27	32	0.0204	0.656	NQEFYGSLHNWGHVLMAR	R	I	0.997	104	25	104	8.21	2	0	0	0	2	2159.02			1245150	313	330	Empty	true
Fed	Hemocyanin AA6 chain	04165fasting_1_16742,27819fed_3_26963	Tityus2_.fasta	71.668,1	1	26	27	32	0.0204	0.656	QAHSFVNEGLFVYAVSVALLHRDDCK	K	G	0.997	76.9	25	76.9	10.5	1	0	0	0	2	2975.48			247283	79	104	Empty	true
Fed	Hemocyanin AA6 chain	04165fasting_1_16742,27819fed_3_26963	Tityus2_.fasta	71.668,1	1	26	27	32	0.0204	0.656	RLYIELDKFR	R	A	0.997	0	0	0	4.15	1	0	0	0	2	1352.77			391329	478	487	Empty	true
Fed	Cytoplasmic aconitate hydratase	23335fed_2_20673	Tityus2_.fasta	98.907,6	0.975	1	1	1	0.000637	0.0145	SCDNFHVKEEDVK	R	N	0.997	66.2	25	66.2	8.38	1	0	0	0	2	1606.72			79.256,7	54	66	Empty	true
Fed	Leucine-rich repeat-containing protein 15	06570fasting_1_815	Tityus2_.fasta	67.023,5	1	7	7	8	0.0051	0.154	ISALPVDLLQSFPNLK	R	V	0.997	117	25	116	6.12	1	0	0	0	2	1755.01			1292410	84	99	Empty	true	24261fed_2_66
Fed	Leucine-rich repeat-containing protein 15	06570fasting_1_815	Tityus2_.fasta	67.023,5	1	7	7	8	0.0051	0.154	ITFLPENIFVPLK	R	E	0.997	35.7	25	26.4	2.59	1	0	0	0	2	1530.89			254340	228	240	Empty	true	24261fed_2_66
Fed	Leucine-rich repeat-containing protein 15	06570fasting_1_815	Tityus2_.fasta	67.023,5	1	7	7	8	0.0051	0.154	ITFLPENIFVPLKELR	R	T	0.997	90	25	90	2.54	1	0	0	0	2	1929.12			3037160	228	243	Empty	true	24261fed_2_66
Fed	Leucine-rich repeat-containing protein 15	06570fasting_1_815	Tityus2_.fasta	67.023,5	1	7	7	8	0.0051	0.154	ITQIPSGFLK	R	G	0.997	28.9	26.1	14.1	1.01	1	0	0	0	2	1103.65			806740	108	117	Empty	true	24261fed_2_66
Fed	Leucine-rich repeat-containing protein 15	06570fasting_1_815	Tityus2_.fasta	67.023,5	1	7	7	8	0.0051	0.154	LPIHTPNPTKFDLSNCK	K	I	0.997	62.9	25.5	62.9	5.42	1	0	0	0	2	1982.02			885176	305	321	Empty	true	24261fed_2_66
Fed	Leucine-rich repeat-containing protein 15	06570fasting_1_815	Tityus2_.fasta	67.023,5	1	7	7	8	0.0051	0.154	TIELSGNEITNFSDKWLFDANK	R	R	0.997	134	25	133	7.89	2	0	0	0	2	2542.25			483121	244	265	Empty	true
Fed	Leucine-rich repeat-containing protein 15	06570fasting_1_815	Tityus2_.fasta	67.023,5	1	7	7	8	0.0051	0.154	TIYIDDWK	K	Y	0.96	58.5	28	51.5	0	1	0	0	0	2	1053.53			811643	324	331	Empty	true	24261fed_2_66
Fed	Apical endosomal glycoprotein	13927fasting_1_2788	Tityus2_.fasta	169.557,3	0.998	1	1	1	0.000637	0.0108	LDHTTGTDYGYYLQAK	K	S	0.997	28.1	25	28.1	2.47	1	0	0	0	2	1845.87			233769	725	740	Empty	true
Fed	Spectrin alpha chain	24329fed_3_722	Tityus2_.fasta	279.318,6	1	5	5	5	0.00318	0.0319	KHQAMLAEINNHENR	K	V	0.997	18.4	26	18.1	1.57	1	0	0	0	2	1804.89			237457	827	841	Empty	true
Fed	Spectrin alpha chain	24329fed_3_722	Tityus2_.fasta	279.318,6	1	5	5	5	0.00318	0.0319	LCNLHEDHAEQIQNK	R	H	0.981	33.8	25	32.9	0	1	0	0	0	2	1848.87			64.422,6	323	337	Empty	true
Fed	Spectrin alpha chain	24329fed_3_722	Tityus2_.fasta	279.318,6	1	5	5	5	0.00318	0.0319	LIEGQHYAADDVAQRR	K	A	0.997	83.3	25.8	76.1	3.33	1	0	0	0	2	1841.93			541813	535	550	Empty	true
Fed	Spectrin alpha chain	24329fed_3_722	Tityus2_.fasta	279.318,6	1	5	5	5	0.00318	0.0319	QSEINEEWTQLTAKANARKE	K	K	0.997	0	0	0	1.92	1	0	0	0	1	2346.17			984974	1260	1279	Empty	true
Fed	Spectrin alpha chain	24329fed_3_722	Tityus2_.fasta	279.318,6	1	5	5	5	0.00318	0.0319	RKEELNDAWQR	K	L	0.997	0	0	0	4.44	1	0	0	0	2	1444.73			205567	231	241	Empty	true
Fed	Leucine-rich repeat-containing protein 15	24261fed_2_66	Tityus2_.fasta	55.768,8	1	2	2	2	0.00127	0.184	ISALPVDLLQSFPNLK	R	V	0.997	117	25	116	6.12	1	0	0	0	2	1755.01			1292410	218	233	Empty	false	06570fasting_1_815
Fed	Leucine-rich repeat-containing protein 15	24261fed_2_66	Tityus2_.fasta	55.768,8	1	2	2	2	0.00127	0.184	ITFLPENIFVPLK	R	E	0.997	35.7	25	26.4	2.59	1	0	0	0	2	1530.89			254340	362	374	Empty	false	06570fasting_1_815
Fed	Leucine-rich repeat-containing protein 15	24261fed_2_66	Tityus2_.fasta	55.768,8	1	2	2	2	0.00127	0.184	ITFLPENIFVPLKELR	R	I	0.997	90	25	90	2.54	1	0	0	0	2	1929.12			3037160	362	377	Empty	false	06570fasting_1_815
Fed	Leucine-rich repeat-containing protein 15	24261fed_2_66	Tityus2_.fasta	55.768,8	1	2	2	2	0.00127	0.184	ITQIPSGFLK	R	G	0.997	28.9	26.1	14.1	1.01	1	0	0	0	2	1103.65			806740	242	251	Empty	false	06570fasting_1_815
Fed	Leucine-rich repeat-containing protein 15	24261fed_2_66	Tityus2_.fasta	55.768,8	1	2	2	2	0.00127	0.184	LLQCLDVNQLR	R	N	0.997	66.1	26.7	59.2	3.66	1	0	0	0	2	1371.74			1340530	64	74	Empty	true
Fed	Leucine-rich repeat-containing protein 15	24261fed_2_66	Tityus2_.fasta	55.768,8	1	2	2	2	0.00127	0.184	LPIHTPNPTKFDLSNCK	K	I	0.997	62.9	25.5	62.9	5.42	1	0	0	0	2	1982.02			885176	439	455	Empty	false	06570fasting_1_815
Fed	Leucine-rich repeat-containing protein 15	24261fed_2_66	Tityus2_.fasta	55.768,8	1	2	2	2	0.00127	0.184	SVVIFGISTTK	K	M	0.997	58.9	25	53.3	1.96	1	0	0	0	2	1151.67			845200	124	134	Empty	true
Fed	Leucine-rich repeat-containing protein 15	24261fed_2_66	Tityus2_.fasta	55.768,8	1	2	2	2	0.00127	0.184	TIYIDDWK	K	Y	0.96	58.5	28	51.5	0	1	0	0	0	2	1053.53			811643	458	465	Empty	false	06570fasting_1_815
Fed	Hemocyanin AA6 chain	10337fasting_2_29538,29086fed_2_1376	Tityus2_.fasta	71.794,0	1	20	22	24	0.0153	0.435	DFDDFIK	K	L	0.988	33.5	25.4	25.4	1.8	1	0	0	0	2	8994147			276518	69	75	Empty	true
Fed	Hemocyanin AA6 chain	10337fasting_2_29538,29086fed_2_1376	Tityus2_.fasta	71.794,0	1	20	22	24	0.0153	0.435	DLSDVDVQDMVR	K	W	0.997	59.3	25.8	55.8	3.08	1	0	0	0	2	1391.65			1260790	258	269	Empty	true
Fed	Hemocyanin AA6 chain	10337fasting_2_29538,29086fed_2_1376	Tityus2_.fasta	71.794,0	1	20	22	24	0.0153	0.435	DSSVTISEVK	R	T	0.997	50.4	29.1	41	2.39	1	0	0	0	2	1064.55			275310	504	513	Empty	true
Fed	Hemocyanin AA6 chain	10337fasting_2_29538,29086fed_2_1376	Tityus2_.fasta	71.794,0	1	20	22	24	0.0153	0.435	ENPGVMSDTSTSLRDPIFYR	Q	W	0.997	49.9	25	49.9	3.64	1	0	0	0	1	2285.09			1370740	341	360	Empty	false	10353fasting_2_29561,19977fed_1_12930,02750fasting_2_13777,27819fed_3_26963,04165fasting_1_16742
Fed	Hemocyanin AA6 chain	10337fasting_2_29538,29086fed_2_1376	Tityus2_.fasta	71.794,0	1	20	22	24	0.0153	0.435	ESELELSHGINFGSDQSVK	K	V	0.997	114	25	114	8.74	1	0	0	0	2	2075.99			649433	410	428	Empty	true
Fed	Hemocyanin AA6 chain	10337fasting_2_29538,29086fed_2_1376	Tityus2_.fasta	71.794,0	1	20	22	24	0.0153	0.435	FIDNIFQEYK	R	C	0.997	47.1	27.4	39.9	4.19	1	0	0	0	2	1316.65			1035640	364	373	Empty	true
Fed	Hemocyanin AA6 chain	10337fasting_2_29538,29086fed_2_1376	Tityus2_.fasta	71.794,0	1	20	22	24	0.0153	0.435	FIPTETINLANK	R	E	0.997	56.2	26.1	53.6	0.854	1	0	0	0	2	1360.75			2719280	119	130	Empty	true
Fed	Hemocyanin AA6 chain	10337fasting_2_29538,29086fed_2_1376	Tityus2_.fasta	71.794,0	1	20	22	24	0.0153	0.435	FQENPGVMSDTSTSLRDPIFYR	R	W	0.997	101	25	97.1	9.49	3	0	0	0	2	2560.21			5683730	339	360	Empty	true
Fed	Hemocyanin AA6 chain	10337fasting_2_29538,29086fed_2_1376	Tityus2_.fasta	71.794,0	1	20	22	24	0.0153	0.435	GLTVPPIQEVFPDR	K	F	0.997	66.2	25.6	58.2	1.72	1	0	0	0	2	1567.85			550567	105	118	Empty	true
Fed	Hemocyanin AA6 chain	10337fasting_2_29538,29086fed_2_1376	Tityus2_.fasta	71.794,0	1	20	22	24	0.0153	0.435	GLTVPPIQEVFPDRFIPTETINLANK	K	E	0.997	58.5	25	58.5	4.82	1	0	0	0	2	2909.58			512637	105	130	Empty	true
Fed	Hemocyanin AA6 chain	10337fasting_2_29538,29086fed_2_1376	Tityus2_.fasta	71.794,0	1	20	22	24	0.0153	0.435	GTLFSCFHSR	R	H	0.997	52.7	26.3	52.7	1.48	1	0	0	0	2	1211.56			935603	43	52	Empty	true
Fed	Hemocyanin AA6 chain	10337fasting_2_29538,29086fed_2_1376	Tityus2_.fasta	71.794,0	1	20	22	24	0.0153	0.435	ILDAINMHYIVDKDNNK	R	I	0.997	60	25	60	8.66	1	0	0	0	2	2016.02			811655	274	290	Empty	true
Fed	Hemocyanin AA6 chain	10337fasting_2_29538,29086fed_2_1376	Tityus2_.fasta	71.794,0	1	20	22	24	0.0153	0.435	IPLDVEHGTDILGDIIESSDESK	K	N	0.997	90.2	25	89.4	8.29	1	0	0	0	2	2482.22			402972	291	313	Empty	true
Fed	Hemocyanin AA6 chain	10337fasting_2_29538,29086fed_2_1376	Tityus2_.fasta	71.794,0	1	20	22	24	0.0153	0.435	LFIELDKFYATLAAGK	R	T	0.997	142	25	132	9.74	1	0	0	0	2	1799.99			339980	480	495	Empty	true
Fed	Hemocyanin AA6 chain	10337fasting_2_29538,29086fed_2_1376	Tityus2_.fasta	71.794,0	1	20	22	24	0.0153	0.435	MIPFHNFEEPLEGYAPHLTSLVSGLQYASRPEGYSIK	R	D	0.997	141	25	141	10.1	2	0	0	0	2	4178.07			806444	221	257	Empty	true
Fed	Hemocyanin AA6 chain	10337fasting_2_29538,29086fed_2_1376	Tityus2_.fasta	71.794,0	1	20	22	24	0.0153	0.435	MIPFHNFEEPLEGYAPHLTSLVSGLQYASRPEGYSIKDLSDVDVQDMVR	R	W	0.997	80.6	25	80.6	10.5	1	0	0	0	2	5566.69			176674	221	269	Empty	true
Fed	Hemocyanin AA6 chain	10337fasting_2_29538,29086fed_2_1376	Tityus2_.fasta	71.794,0	1	20	22	24	0.0153	0.435	QFVNEGMFVYAVSVAVLHREDCK	R	G	0.997	94.3	25	94.3	9.92	1	0	0	0	2	2698.31			318532	82	104	Empty	true
Fed	Hemocyanin AA6 chain	10337fasting_2_29538,29086fed_2_1376	Tityus2_.fasta	71.794,0	1	20	22	24	0.0153	0.435	TAAEFLTANMALIDIK	R	I	0.997	143	25	143	14.9	1	0	0	0	2	1721.91			166246	607	622	Empty	true
Fed	Hemocyanin AA6 chain	10337fasting_2_29538,29086fed_2_1376	Tityus2_.fasta	71.794,0	1	20	22	24	0.0153	0.435	TPNVVTTLTK	K	E	0.997	79.8	27.8	73.1	6.38	1	0	0	0	2	1073.62			1379390	400	409	Empty	true
Fed	Hemocyanin AA6 chain	10337fasting_2_29538,29086fed_2_1376	Tityus2_.fasta	71.794,0	1	20	22	24	0.0153	0.435	YDELNNKLEPDEQR	K	R	0.997	92.6	25	92.6	12.9	1	0	0	0	2	1762.82			975630	465	478	Empty	true
Fed	Hemocyanin AA6 chain	10337fasting_2_29538,29086fed_2_1376	Tityus2_.fasta	71.794,0	1	20	22	24	0.0153	0.435	YDELNNKLEPDEQRR	K	L	0.997	0	0	0	6.29	2	0	0	0	2	1918.93			2071740	465	479	Empty	true
Fed	Lysosomal alpha-glucosidase	18167fed_3_10667	Tityus2_.fasta	107.750,2	1	3	3	3	0.00191	0.0488	LSSPYIYGLGQHK	R	A	0.997	50.6	27.3	42.6	2.7	1	0	0	0	2	1462.77			343992	262	274	Empty	true
Fed	Lysosomal alpha-glucosidase	18167fed_3_10667	Tityus2_.fasta	107.750,2	1	3	3	3	0.00191	0.0488	NHNTDDAIDQDPVSLGPEVVK	R	A	0.997	68.8	25	68.8	7.05	1	0	0	0	2	2263.08			586002	683	703	Empty	true
Fed	Lysosomal alpha-glucosidase	18167fed_3_10667	Tityus2_.fasta	107.750,2	1	3	3	3	0.00191	0.0488	WSALGAFYPFSR	R	N	0.997	68.3	26.8	60.7	3.24	1	0	0	0	2	1401.69			199901	671	682	Empty	true
Fed	Alpha-actinin, sarcomeric	00413fasting_3_10882,18069fed_2_10566	Tityus2_.fasta	103.705,6	1	12	12	13	0.00828	0.134	AKLETNFNTLQTK	K	L	0.997	121	26.5	119	9.41	2	0	0	0	2	1507.81			985043	333	345	Empty	true
Fed	Alpha-actinin, sarcomeric	00413fasting_3_10882,18069fed_2_10566	Tityus2_.fasta	103.705,6	1	12	12	13	0.00828	0.134	ESTDSDTAEQIIDSFR	R	I	0.997	25.8	25	25.8	1.36	1	0	0	0	2	1813.81			469068	820	835	Empty	true
Fed	Alpha-actinin, sarcomeric	00413fasting_3_10882,18069fed_2_10566	Tityus2_.fasta	103.705,6	1	12	12	13	0.00828	0.134	GITQDQLNEFR	K	M	0.997	70	39.4	0	0	1	0	0	0	2	1334.67			1650160	743	753	Empty	true
Fed	Alpha-actinin, sarcomeric	00413fasting_3_10882,18069fed_2_10566	Tityus2_.fasta	103.705,6	1	12	12	13	0.00828	0.134	KHEAFESDLAAHQDR	K	V	0.997	79.3	25	79.3	7.19	1	0	0	0	2	1753.83			279290	437	451	Empty	true
Fed	Alpha-actinin, sarcomeric	00413fasting_3_10882,18069fed_2_10566	Tityus2_.fasta	103.705,6	1	12	12	13	0.00828	0.134	LASDLLEWIR	R	R	0.997	78.9	27.1	66.4	4.05	1	0	0	0	2	1215.67			468605	283	292	Empty	true
Fed	Alpha-actinin, sarcomeric	00413fasting_3_10882,18069fed_2_10566	Tityus2_.fasta	103.705,6	1	12	12	13	0.00828	0.134	LASDLLEWIRR	R	T	0.997	56.5	25.2	41.6	1.12	1	0	0	0	2	1371.77			610084	283	293	Empty	true
Fed	Alpha-actinin, sarcomeric	00413fasting_3_10882,18069fed_2_10566	Tityus2_.fasta	103.705,6	1	12	12	13	0.00828	0.134	LERLDHLAQK	R	F	0.97	43.7	37.6	0	0	1	0	0	0	2	1236.71			272941	390	399	Empty	true
Fed	Alpha-actinin, sarcomeric	00413fasting_3_10882,18069fed_2_10566	Tityus2_.fasta	103.705,6	1	12	12	13	0.00828	0.134	LETNFNTLQTK	K	L	0.997	94.2	27.5	77.9	4.14	1	0	0	0	2	1308.68			972982	335	345	Empty	true
Fed	Alpha-actinin, sarcomeric	00413fasting_3_10882,18069fed_2_10566	Tityus2_.fasta	103.705,6	1	12	12	13	0.00828	0.134	MVSDIANAWK	K	G	0.997	62.2	28.1	59.6	2.62	1	0	0	0	2	1134.56			862276	361	370	Empty	true
Fed	Alpha-actinin, sarcomeric	00413fasting_3_10882,18069fed_2_10566	Tityus2_.fasta	103.705,6	1	12	12	13	0.00828	0.134	NINEVENQILTR	R	D	0.997	83.5	26.3	81.8	4.24	1	0	0	0	2	1442.76			1514980	728	739	Empty	true
Fed	Alpha-actinin, sarcomeric	00413fasting_3_10882,18069fed_2_10566	Tityus2_.fasta	103.705,6	1	12	12	13	0.00828	0.134	VGWEQLLTSIHR	R	N	0.997	81.9	38.5	66.8	0	1	0	0	0	2	1415.76			106679	716	727	Empty	true
Fed	Alpha-actinin, sarcomeric	00413fasting_3_10882,18069fed_2_10566	Tityus2_.fasta	103.705,6	1	12	12	13	0.00828	0.134	YTQYTMETLR	S	V	0.997	48.7	37.5	47.5	3.8	1	0	0	0	1	1305.61			1277150	706	715	Empty	true
Fed	Hemocyanin F chain	10353fasting_2_29561	Tityus2_.fasta	71.568,2	1	14	14	16	0.00992	0.465	AMGFPFDR	R	V	0.997	49.7	27	43.3	1.92	1	0	0	0	2	9404346			658474	592	599	Empty	true	10961fasting_2_31159
Fed	Hemocyanin F chain	10353fasting_2_29561	Tityus2_.fasta	71.568,2	1	14	14	16	0.00992	0.465	ASLHSYDEHDLDFPGVHIEHVTVNAK	K	V	0.997	131	25	131	17.9	2	0	0	0	2	2930.41			1944940	374	399	Empty	true
Fed	Hemocyanin F chain	10353fasting_2_29561	Tityus2_.fasta	71.568,2	1	14	14	16	0.00992	0.465	DATNSSVTISHVPTFDELKEGK	R	G	0.997	143	25	143	14.9	2	0	0	0	2	2375.17			1796630	499	520	Empty	true
Fed	Hemocyanin F chain	10353fasting_2_29561	Tityus2_.fasta	71.568,2	1	14	14	16	0.00992	0.465	ENPGVMSDTSTSLRDPIFYR	R	L	0.997	61	25	61	3.89	1	0	0	0	2	2285.09			1407750	341	360	Empty	false	19977fed_1_12930,10337fasting_2_29538,02750fasting_2_13777,27819fed_3_26963,04165fasting_1_16742,29086fed_2_1376
Fed	Hemocyanin F chain	10353fasting_2_29561	Tityus2_.fasta	71.568,2	1	14	14	16	0.00992	0.465	FMDNMFQEYK	R	A	0.997	77.3	25	77.3	5.52	1	0	0	0	2	1352.57			537109	364	373	Empty	true
Fed	Hemocyanin F chain	10353fasting_2_29561	Tityus2_.fasta	71.568,2	1	14	14	16	0.00992	0.465	FRENPGVMSDTSTSLRDPIFYR	R	L	0.997	0	0	0	5.24	1	0	0	0	2	2604.25			942134	339	360	Empty	true
Fed	Hemocyanin F chain	10353fasting_2_29561	Tityus2_.fasta	71.568,2	1	14	14	16	0.00992	0.465	FVPAETINHALK	R	A	0.997	50.8	26.2	50.8	2.35	1	0	0	0	2	1339.74			967232	119	130	Empty	true
Fed	Hemocyanin F chain	10353fasting_2_29561	Tityus2_.fasta	71.568,2	1	14	14	16	0.00992	0.465	GKLFSCFHADHLAEAETLYTALFQAK	R	D	0.997	58.2	25	58.2	10.6	1	0	0	0	2	2968.47			397163	43	68	Empty	true
Fed	Hemocyanin F chain	10353fasting_2_29561	Tityus2_.fasta	71.568,2	1	14	14	16	0.00992	0.465	GLYIELDKFHK	R	E	0.997	49.7	26.9	49.7	1.96	1	0	0	0	2	1362.74			835351	477	487	Empty	true
Fed	Hemocyanin F chain	10353fasting_2_29561	Tityus2_.fasta	71.568,2	1	14	14	16	0.00992	0.465	GVTVPPIQEIFPDR	K	F	0.997	70.5	25.7	67.6	1.11	1	0	0	0	2	1567.85			1520620	105	118	Empty	false	19977fed_1_12930,02750fasting_2_13777
Fed	Hemocyanin F chain	10353fasting_2_29561	Tityus2_.fasta	71.568,2	1	14	14	16	0.00992	0.465	IFLGPKYDELGNR	R	M	0.997	96.8	26.7	84.2	3.48	1	0	0	0	2	1521.81			3415990	457	469	Empty	false	19977fed_1_12930,02750fasting_2_13777
Fed	Hemocyanin F chain	10353fasting_2_29561	Tityus2_.fasta	71.568,2	1	14	14	16	0.00992	0.465	ILPLFEHLTSLTAK	R	Q	0.997	72.5	25	59.3	5.82	1	0	0	0	2	1582.92			544013	10	23	Empty	true
Fed	Hemocyanin F chain	10353fasting_2_29561	Tityus2_.fasta	71.568,2	1	14	14	16	0.00992	0.465	KGELFYYMHQQMCAR	R	Y	0.997	48	25	43.8	5.15	2	0	0	0	2	1993.87			1927200	194	208	Empty	false	10939fasting_3_31133,27819fed_3_26963,10961fasting_2_31159,04165fasting_1_16742,10999fasting_2_31207
Fed	Hemocyanin F chain	10353fasting_2_29561	Tityus2_.fasta	71.568,2	1	14	14	16	0.00992	0.465	LSTGLKRMTPFQ	R	N	0.975	0	0	0	1.15	1	0	0	0	1	1378.75			642391	214	225	Empty	true
Fed	Hemocyanin F chain	10353fasting_2_29561	Tityus2_.fasta	71.568,2	1	14	14	16	0.00992	0.465	VLDAIHVGHVIDDHGHEIPLDEEHGIDILGSLLESSAESK	R	N	0.997	82	25	82	7.1	1	0	0	0	2	4296.14			411782	274	313	Empty	true
Fed	Hemocyanin F chain	10353fasting_2_29561	Tityus2_.fasta	71.568,2	1	14	14	16	0.00992	0.465	VPDVITTTMKEDVLQLSHGIK	K	T	0.997	112	25	101	6.68	1	0	0	0	2	2324.25			521570	400	420	Empty	true
Fed	Hemocyanin F chain	10353fasting_2_29561	Tityus2_.fasta	71.568,2	1	14	14	16	0.00992	0.465	VQFEHLDHEPFSYSIEIQNK	K	S	0.997	52.4	25	52.1	5.8	1	0	0	0	2	2460.18			1164360	427	446	Empty	true
Fed	Hemocyanin F chain	10353fasting_2_29561	Tityus2_.fasta	71.568,2	1	14	14	16	0.00992	0.465	YDCDRLSTGLKR	R	M	0.997	0	0	0	1.52	1	0	0	0	2	1483.73			297172	209	220	Empty	true
Fed	Hemocyanin F chain	10353fasting_2_29561	Tityus2_.fasta	71.568,2	1	14	14	16	0.00992	0.465	YDELGNR	K	M	0.988	32.7	28.1	14.1	0.854	1	0	0	0	2	8664003			24.505,5	463	469	Empty	false	19977fed_1_12930,02750fasting_2_13777
Fed	Cytoplasmic aconitate hydratase	23335fed_2_20673	Tityus2_.fasta	98.907,6	0.95	1	1	1	0.00062	0.0145	SCDNFHVKEEDVK	R	N	0.997	62.3	25	61.7	9.39	1	0	0	0	2	1606.72			51.191,5	54	66	Empty	true
Fed	Speckle targeted PIP5K1A-regulated poly A polymerase	30528fed_3_3241	Tityus2_.fasta	88.361,4	1	2	2	2	0.00124	0.0285	NVFDRTQVSR	K	K	0.997	35.8	27.6	20.5	1.34	1	0	0	0	2	1221.63			15245200	564	573	Empty	true
Fed	Speckle targeted PIP5K1A-regulated poly A polymerase	30528fed_3_3241	Tityus2_.fasta	88.361,4	1	2	2	2	0.00124	0.0285	SSPNEYLSFKVK	Y	F	0.965	0	0	0	0.854	1	0	0	0	1	1398.73			3388350	504	515	Empty	true
Fed	Myosin heavy chain, muscle	01027fasting_2_11482,25375fed_1_21866	Tityus2_.fasta	226.839,1	1	6	6	8	0.00496	0.028	EKEMASLAAKLEDEQSLVAK	K	L	0.997	131	38.2	0	10.5	2	0	0	0	2	2174.14			1562580	1081	1100	Empty	true
Fed	Myosin heavy chain, muscle	01027fasting_2_11482,25375fed_1_21866	Tityus2_.fasta	226.839,1	1	6	6	8	0.00496	0.028	IEELEEELEAER	R	Q	0.985	65.6	37.5	16.5	0	1	0	0	0	2	1474.69			1659350	1112	1123	Empty	true	03841fasting_3_15996,20301fed_2_13529
Fed	Myosin heavy chain, muscle	01027fasting_2_11482,25375fed_1_21866	Tityus2_.fasta	226.839,1	1	6	6	8	0.00496	0.028	IEELEEELEAERQAR	R	A	0.997	102	38.7	18	0	1	0	0	0	2	1829.89			1508920	1112	1126	Empty	true
Fed	Myosin heavy chain, muscle	01027fasting_2_11482,25375fed_1_21866	Tityus2_.fasta	226.839,1	1	6	6	8	0.00496	0.028	LEDEQSLVAK	K	L	0.997	67.3	28.9	53.4	1.55	1	0	0	0	2	1131.59			298729	1091	1100	Empty	true	03841fasting_3_15996
Fed	Myosin heavy chain, muscle	01027fasting_2_11482,25375fed_1_21866	Tityus2_.fasta	226.839,1	1	6	6	8	0.00496	0.028	NLNDEIAHQDELINK	R	F	0.997	65.2	26	65.2	3	1	0	0	0	2	1765.87			1219180	974	988	Empty	true	16487fasting_2_6726
Fed	Myosin heavy chain, muscle	01027fasting_2_11482,25375fed_1_21866	Tityus2_.fasta	226.839,1	1	6	6	8	0.00496	0.028	NLNDEIAHQDELINKFNKEK	R	K	0.997	90.7	39.2	88.9	0	2	0	0	0	2	2378.23			2897200	974	993	Empty	true
Fed	Zinc finger CCCH-type with G patch domain-containing protein	02385fasting_2_13173	Tityus2_.fasta	59.777,7	0.81	1	1	1	0.00062	0.0135	KDLLTLK	R	S	0.988	69.8	29.5	20	1.82	1	0	0	0	2	8305348			1152990	44	50	Empty	true
Fed	Catalase	06540fasting_3_79	Tityus2_.fasta	62.484,5	1	6	7	8	0.00496	0.182	AAELSGSDPDYSIRDLYNAIR	K	S	0.997	110	25	110	6.43	2	0	0	0	2	2326.13			3369920	283	303	Empty	true	24000fed_2_451
Fed	Catalase	06540fasting_3_79	Tityus2_.fasta	62.484,5	1	6	7	8	0.00496	0.182	FSTVGGESGSADTVRDPR	R	G	0.997	45.8	25	33.2	3.02	1	0	0	0	2	1837.87			2820050	109	126	Empty	true
Fed	Catalase	06540fasting_3_79	Tityus2_.fasta	62.484,5	1	6	7	8	0.00496	0.182	GAGAFGTFVVTHDITK	K	Y	0.997	99.5	27	85.6	4.17	1	0	0	0	2	1620.84			874515	74	89	Empty	true
Fed	Catalase	06540fasting_3_79	Tityus2_.fasta	62.484,5	1	6	7	8	0.00496	0.182	GPMLLQDVVYLEEMAHFDRER	R	I	0.997	104	25	104	9.68	2	0	0	0	2	2548.23			746425	44	64	Empty	true
Fed	Catalase	06540fasting_3_79	Tityus2_.fasta	62.484,5	1	6	7	8	0.00496	0.182	LGANFLQIPVNCPYR	R	A	0.997	58.4	26.1	56.6	0.921	1	0	0	0	2	1761.91			355531	399	413	Empty	true	24000fed_2_451
Fed	Catalase	06540fasting_3_79	Tityus2_.fasta	62.484,5	1	6	7	8	0.00496	0.182	WNPFDLTK	R	I	0.997	25	29.2	15.7	2.39	1	0	0	0	2	1020.51			762385	327	334	Empty	true	24000fed_2_451
Fed	unknown protein	06549fasting_1_798	Tityus2_.fasta	42.296,1	1	4	4	4	0.00248	0.131	LDLNHFFGGNTPFIYIGEAK	K	K	0.997	77.5	25	77.5	7.62	1	0	0	0	2	2253.13			467006	20	39	Empty	true
Fed	unknown protein	06549fasting_1_798	Tityus2_.fasta	42.296,1	1	4	4	4	0.00248	0.131	NTDQLLVFK	K	A	0.997	67	28.4	60.5	2.42	1	0	0	0	2	1077.59			374574	251	259	Empty	true
Fed	unknown protein	06549fasting_1_798	Tityus2_.fasta	42.296,1	1	4	4	4	0.00248	0.131	VAFDITPCFPLELIEPLK	R	F	0.997	53.5	25	53.5	4.82	1	0	0	0	2	2102.12			167822	133	150	Empty	true
Fed	unknown protein	06549fasting_1_798	Tityus2_.fasta	42.296,1	1	4	4	4	0.00248	0.131	VAFDITPCFPLELIEPLKFK	R	V	0.997	126	25	126	8.57	1	0	0	0	2	2377.29			423983	133	152	Empty	true
Fed	Hemocyanin B chain	10939fasting_3_31133	Tityus2_.fasta	73.668,1	1	17	19	21	0.013	0.427	DFVNEGLYIYAVAVAILHR	R	K	0.997	131	25	131	10.3	1	0	0	0	2	2163.16			178552	85	103	Empty	true
Fed	Hemocyanin B chain	10939fasting_3_31133	Tityus2_.fasta	73.668,1	1	17	19	21	0.013	0.427	EVSVQEMER	K	W	0.997	43.9	27.3	31.8	1.09	1	0	0	0	2	1106.51			685817	264	272	Empty	true
Fed	Hemocyanin B chain	10939fasting_3_31133	Tityus2_.fasta	73.668,1	1	17	19	21	0.013	0.427	FDELGNEIEANELRR	K	L	0.997	52.7	25.9	52.6	2.6	1	0	0	0	2	1804.88			812470	469	483	Empty	true
Fed	Hemocyanin B chain	10939fasting_3_31133	Tityus2_.fasta	73.668,1	1	17	19	21	0.013	0.427	FIDDMFQEYKK	R	T	0.997	86	26.5	84.6	5.72	1	0	0	0	2	1463.69			967322	367	377	Empty	true
Fed	Hemocyanin B chain	10939fasting_3_31133	Tityus2_.fasta	73.668,1	1	17	19	21	0.013	0.427	FVPIETLLK	K	A	0.997	47.7	25	40.2	2.4	1	0	0	0	2	1059.64			1105500	122	130	Empty	true
Fed	Hemocyanin B chain	10939fasting_3_31133	Tityus2_.fasta	73.668,1	1	17	19	21	0.013	0.427	GLPLDEEHGIDILGNLVESSYDSINVDVYGSLHNWGHVLMAR	K	A	0.997	61.2	25	61.2	12.1	1	0	0	0	2	4634.26			286102	293	334	Empty	true
Fed	Hemocyanin B chain	10939fasting_3_31133	Tityus2_.fasta	73.668,1	1	17	19	21	0.013	0.427	GMPFHLFVILTDFTQDFVPDHSHR	K	S	0.997	129	25	129	11	1	0	0	0	2	2856.39			199565	551	574	Empty	true
Fed	Hemocyanin B chain	10939fasting_3_31133	Tityus2_.fasta	73.668,1	1	17	19	21	0.013	0.427	HVTLPPIQEIFPEK	R	F	0.997	77.7	25	75.5	6.96	1	0	0	0	2	1647.91			223503	108	121	Empty	true
Fed	Hemocyanin B chain	10939fasting_3_31133	Tityus2_.fasta	73.668,1	1	17	19	21	0.013	0.427	HVTLPPIQEIFPEKFVPIETLLK	R	A	0.997	21.3	25	21.3	8.96	1	0	0	0	2	2688.54			339276	108	130	Empty	true
Fed	Hemocyanin B chain	10939fasting_3_31133	Tityus2_.fasta	73.668,1	1	17	19	21	0.013	0.427	IFLAPKFDELGNEIEANELR	R	R	0.997	69.2	25	67.5	7.66	1	0	0	0	2	2318.2			393325	463	482	Empty	true
Fed	Hemocyanin B chain	10939fasting_3_31133	Tityus2_.fasta	73.668,1	1	17	19	21	0.013	0.427	IFLAPKFDELGNEIEANELRR	R	L	0.997	0	0	0	6.03	1	0	0	0	2	2474.3			1211880	463	483	Empty	true
Fed	Hemocyanin B chain	10939fasting_3_31133	Tityus2_.fasta	73.668,1	1	17	19	21	0.013	0.427	ILDSIHLATVIDKHGK	R	G	0.997	105	25	102	2.35	1	0	0	0	2	1760.01			1224700	277	292	Empty	true
Fed	Hemocyanin B chain	10939fasting_3_31133	Tityus2_.fasta	73.668,1	1	17	19	21	0.013	0.427	KGELFYYMHQQMCAR	R	Y	0.997	48	25	43.8	5.15	2	0	0	0	2	1993.87			1927200	197	211	Empty	false	10353fasting_2_29561,27819fed_3_26963,10961fasting_2_31159,04165fasting_1_16742,10999fasting_2_31207
Fed	Hemocyanin B chain	10939fasting_3_31133	Tityus2_.fasta	73.668,1	1	17	19	21	0.013	0.427	LASMHDDKEEVIVQSEK	K	T	0.997	105	25.2	94.6	12	4	0	0	0	2	1957.95			4937630	134	150	Empty	true
Fed	Hemocyanin B chain	10939fasting_3_31133	Tityus2_.fasta	73.668,1	1	17	19	21	0.013	0.427	LLPLFQYVPLLTK	R	E	0.997	86.7	25	83.6	2.03	1	0	0	0	2	1544.95			512569	12	24	Empty	true
Fed	Hemocyanin B chain	10939fasting_3_31133	Tityus2_.fasta	73.668,1	1	17	19	21	0.013	0.427	LMVELDKFSTELEPGVNTIEHSSR	R	D	0.997	168	25	168	10.9	2	0	0	0	2	2731.36			916265	484	507	Empty	true
Fed	Hemocyanin B chain	10939fasting_3_31133	Tityus2_.fasta	73.668,1	1	17	19	21	0.013	0.427	VAYQHLDHETFTYK	K	I	0.997	105	25.9	105	5.85	1	0	0	0	2	1751.84			904375	433	446	Empty	true
Fed	Hemocyanin B chain	10939fasting_3_31133	Tityus2_.fasta	73.668,1	1	17	19	21	0.013	0.427	YQTNPGVMSDTATSLRDPIFYR	R	W	0.997	64.4	25	62.8	3.24	1	0	0	0	2	2532.22			736395	342	363	Empty	true
Fed	Hemocyanin II	10999fasting_2_31207	Tityus2_.fasta	72.662,2	1	15	16	18	0.0112	0.429	ASTKPAGDESPIVVDVK	K	E	0.997	60.6	25.6	58.6	3.96	1	0	0	0	2	1712.91			1431910	134	150	Empty	true
Fed	Hemocyanin II	10999fasting_2_31207	Tityus2_.fasta	72.662,2	1	15	16	18	0.0112	0.429	EQLSFPGVDVVDIR	K	V	0.997	88.4	26.4	76.8	6.74	1	0	0	0	2	1573.82			1100710	386	399	Empty	true
Fed	Hemocyanin II	10999fasting_2_31207	Tityus2_.fasta	72.662,2	1	15	16	18	0.0112	0.429	EVALDEEHGADILGDLIESSYESK	K	N	0.997	103	25	103	8.96	1	0	0	0	2	2619.23			503910	294	317	Empty	true
Fed	Hemocyanin II	10999fasting_2_31207	Tityus2_.fasta	72.662,2	1	15	16	18	0.0112	0.429	FIDNIFQDYK	R	A	0.997	51.6	27.5	41.1	3.49	1	0	0	0	2	1302.64			356687	368	377	Empty	false	19977fed_1_12930,02750fasting_2_13777
Fed	Hemocyanin II	10999fasting_2_31207	Tityus2_.fasta	72.662,2	1	15	16	18	0.0112	0.429	FVPAATMAEILSK	R	A	0.997	87.2	27.4	79.5	4.66	1	0	0	0	2	1377.74			876626	121	133	Empty	true
Fed	Hemocyanin II	10999fasting_2_31207	Tityus2_.fasta	72.662,2	1	15	16	18	0.0112	0.429	GLSVPPIQQIFPER	K	F	0.997	68.6	25	50.7	3.21	1	0	0	0	2	1580.88			554691	107	120	Empty	true
Fed	Hemocyanin II	10999fasting_2_31207	Tityus2_.fasta	72.662,2	1	15	16	18	0.0112	0.429	HLSLATVGGEVPHEQR	K	D	0.997	67.8	25.2	67.8	8.85	2	0	0	0	2	1729.9			1182720	16	31	Empty	true
Fed	Hemocyanin II	10999fasting_2_31207	Tityus2_.fasta	72.662,2	1	15	16	18	0.0112	0.429	HLYEVFYEAKDFDDFVHLAQEAR	R	T	0.997	167	25	167	24.4	1	0	0	0	2	2842.35			1016250	61	83	Empty	true
Fed	Hemocyanin II	10999fasting_2_31207	Tityus2_.fasta	72.662,2	1	15	16	18	0.0112	0.429	IFLAPKYDELGNVIPPNELR	R	R	0.997	49.7	25	49	3.2	1	0	0	0	2	2298.25			348806	463	482	Empty	true
Fed	Hemocyanin II	10999fasting_2_31207	Tityus2_.fasta	72.662,2	1	15	16	18	0.0112	0.429	IFLAPKYDELGNVIPPNELRR	R	L	0.997	0	0	0	7.42	1	0	0	0	2	2454.35			382278	463	483	Empty	true
Fed	Hemocyanin II	10999fasting_2_31207	Tityus2_.fasta	72.662,2	1	15	16	18	0.0112	0.429	IIDAIHLGHIEDAHGK	R	E	0.997	82.8	25	82.7	4.37	1	0	0	0	2	1738.92			595059	278	293	Empty	true
Fed	Hemocyanin II	10999fasting_2_31207	Tityus2_.fasta	72.662,2	1	15	16	18	0.0112	0.429	IIDAIHLGHIEDAHGKEVALDEEHGADILGDLIESSYESK	R	N	0.997	25.2	25	25.2	3.57	1	0	0	0	2	4339.14			471830	278	317	Empty	true
Fed	Hemocyanin II	10999fasting_2_31207	Tityus2_.fasta	72.662,2	1	15	16	18	0.0112	0.429	KGELFYYMHQQMCAR	R	Y	0.997	48	25	43.8	5.15	2	0	0	0	2	1993.87			1927200	198	212	Empty	false	10353fasting_2_29561,10939fasting_3_31133,27819fed_3_26963,10961fasting_2_31159,04165fasting_1_16742
Fed	Hemocyanin II	10999fasting_2_31207	Tityus2_.fasta	72.662,2	1	15	16	18	0.0112	0.429	LADLAFSVHPGEIFSCFHPDHLEDAR	R	H	0.997	97.8	25	97.8	11.1	1	0	0	0	2	2980.4			419497	35	60	Empty	true
Fed	Hemocyanin II	10999fasting_2_31207	Tityus2_.fasta	72.662,2	1	15	16	18	0.0112	0.429	LSDLKDVDVQEMER	K	W	0.997	80.5	25.2	80.5	5.47	1	0	0	0	2	1692.81			535149	260	273	Empty	true
Fed	Hemocyanin II	10999fasting_2_31207	Tityus2_.fasta	72.662,2	1	15	16	18	0.0112	0.429	MVPFHNFDEELEGYAPHLSHLSSGR	R	Y	0.997	89.2	25	89.2	8.57	3	0	0	0	2	2869.34			967196	225	249	Empty	true
Fed	Hemocyanin II	10999fasting_2_31207	Tityus2_.fasta	72.662,2	1	15	16	18	0.0112	0.429	TFVNEGLFAFAAEVAILYRPDCK	R	G	0.997	103	25	77	11.9	1	0	0	0	2	2631.33			82.068,7	84	106	Empty	true
Fed	Myosin heavy chain, muscle	16487fasting_2_6726	Tityus2_.fasta	11.681,5	0.998	1	1	2	0.00124	0.176	NLNDEIAHQDELINK	R	L	0.997	65.2	26	65.2	3	1	0	0	0	2	1765.87			1219180	84	98	Empty	false	01027fasting_2_11482,25375fed_1_21866
Fed	Myosin heavy chain, muscle	16487fasting_2_6726	Tityus2_.fasta	11.681,5	0.998	1	1	2	0.00124	0.176	NLNDEIAHQDELINKLNK	R	-	0.997	139	25	139	7.52	2	0	0	0	2	2121.09			5255700	84	101	Empty	true
Fed	unknown protein	06266fasting_2_577,21059fed_3_15073	Tityus2_.fasta	16.893,8	0.544	1	1	1	0.00062	0.0537	VIFDYLLK	K	V	0.958	34.6	25	32.4	0	1	0	0	0	2	1010.59			203853	131	138	Empty	true
Fed	23666fed_2_19-DECOY Calreticulin	23666fed_2_19-DECOY		0,0	0.793	1	1	1	0.00062	0	TSGWTEEGVK	K	Q	0.986	0	0	0	2.18	1	0	0	0	2	1093.52			938024	0	0	Empty	true
Fed	Calreticulin	06327fasting_1_621	Tityus2_.fasta	31.059,4	0.95	1	1	1	0.00062	0.15	FYGDAEKDKGIQTSQDAR	K	F	0.997	0	0	0	8.57	1	0	0	0	2	2028.96			1027440	56	73	Empty	false	23666fed_2_19
Fed	Calreticulin	06327fasting_1_621	Tityus2_.fasta	31.059,4	0.95	1	1	1	0.00062	0.15	LFDDSLDQK	K	D	0.997	29.6	28.2	18.5	1000	1	0	0	0	2	1080.52			355666	112	120	Empty	false	23666fed_2_19
Fed	Calreticulin	06327fasting_1_621	Tityus2_.fasta	31.059,4	0.95	1	1	1	0.00062	0.15	WIPSEHKGNELGK	R	F	0.997	48.7	26.6	42.8	2.08	1	0	0	0	2	1494.77			487001	36	48	Empty	true
Fed	Calreticulin	23666fed_2_19	Tityus2_.fasta	43.288,8	1	5	5	5	0.0031	0.247	FIDIAAFGFDLWQVK	R	S	0.997	77.7	25.5	77.7	7.96	1	0	0	0	2	1769.93			142534	271	285	Empty	true
Fed	Calreticulin	23666fed_2_19	Tityus2_.fasta	43.288,8	1	5	5	5	0.0031	0.247	FYGDAEKDKGIQTSQDAR	K	F	0.997	0	0	0	8.57	1	0	0	0	2	2028.96			1027440	19	36	Empty	true	06327fasting_1_621
Fed	Calreticulin	23666fed_2_19	Tityus2_.fasta	43.288,8	1	5	5	5	0.0031	0.247	GPWIHPEIDNPEYVPDPFIYR	K	F	0.997	32	25	32	5.64	1	0	0	0	2	2554.24			189520	250	270	Empty	true
Fed	Calreticulin	23666fed_2_19	Tityus2_.fasta	43.288,8	1	5	5	5	0.0031	0.247	LFDDSLDQK	K	D	0.997	29.6	28.2	18.5	1000	1	0	0	0	2	1080.52			355666	75	83	Empty	true	06327fasting_1_621
Fed	Calreticulin	23666fed_2_19	Tityus2_.fasta	43.288,8	1	5	5	5	0.0031	0.247	SGTIFDNVLITDDEDFAQKVGEETWGSTK	K	D	0.997	166	25	166	12.5	1	0	0	0	2	3202.51			290207	286	314	Empty	true
Fed	Glycogen debranching enzyme	17971fed_2_10460	Tityus2_.fasta	176.900,0	0.95	1	1	1	0.00062	0.00515	LGISSLIR	R	E	0.997	58.5	28.2	44.4	1.11	1	0	0	0	2	8585408			666561	585	592	Empty	true
Fed	Myelin expression factor 2	27015fed_2_25323	Tityus2_.fasta	47.590,9	0.95	1	1	2	0.00124	0.0224	VISIELKTDK	K	E	0.997	40.5	25.5	27.7	1.02	2	0	0	0	2	1145.68			5160310	236	245	Empty	true
Fed	Calcium-transporting ATPase sarcoplasmic-endoplasmic reticulum type	26540fed_2_24694	Tityus2_.fasta	109.900,1	0.95	1	1	1	0.00062	0.00799	EFTLEFSR	K	D	0.997	53.3	26.8	38.8	3	1	0	0	0	2	1028.5			420834	483	490	Empty	true	02437fasting_3_13258
Fed	Uncharacterized protein C3H1.02c	06551fasting_2_800	Tityus2_.fasta	116.414,4	1	18	20	20	0.0124	0.239	EDMKYWQNLLR	K	K	0.997	41.9	27.3	40.5	2.82	1	0	0	0	2	1495.74			196204	432	442	Empty	true
Fed	Uncharacterized protein C3H1.02c	06551fasting_2_800	Tityus2_.fasta	116.414,4	1	18	20	20	0.0124	0.239	EIEECVALEVLHEYLDR	K	T	0.997	104	25	104	7.37	1	0	0	0	2	2117.02			181333	289	305	Empty	true
Fed	Uncharacterized protein C3H1.02c	06551fasting_2_800	Tityus2_.fasta	116.414,4	1	18	20	20	0.0124	0.239	FYLPLFVR	R	L	0.997	37.2	25.4	24.4	0.886	1	0	0	0	2	1054.61			498722	574	581	Empty	true
Fed	Uncharacterized protein C3H1.02c	06551fasting_2_800	Tityus2_.fasta	116.414,4	1	18	20	20	0.0124	0.239	GPLPEFTRPWQNPVPPLTEPVLK	K	T	0.997	64.6	25	64.6	7.09	1	0	0	0	2	2612.42			624273	243	265	Empty	true
Fed	Uncharacterized protein C3H1.02c	06551fasting_2_800	Tityus2_.fasta	116.414,4	1	18	20	20	0.0124	0.239	INAADVFK	K	A	0.997	63.5	29.8	46.3	1.51	1	0	0	0	2	8774778			1252530	223	230	Empty	true
Fed	Uncharacterized protein C3H1.02c	06551fasting_2_800	Tityus2_.fasta	116.414,4	1	18	20	20	0.0124	0.239	KYVDNLFNGKEQWDELLFESSR	K	N	0.997	0	0	0	6.89	1	0	0	0	2	2717.32			206182	885	906	Empty	true
Fed	Uncharacterized protein C3H1.02c	06551fasting_2_800	Tityus2_.fasta	116.414,4	1	18	20	20	0.0124	0.239	LATGEEEFDMKR	K	M	0.997	90.8	25.4	89.3	4.24	2	0	0	0	2	1441.66			2728010	364	375	Empty	true	00673fasting_1_11122,29162fed_3_1470
Fed	Uncharacterized protein C3H1.02c	06551fasting_2_800	Tityus2_.fasta	116.414,4	1	18	20	20	0.0124	0.239	LITELPIER	R	N	0.997	52.1	25	43.2	0	1	0	0	0	2	1083.64			1998360	582	590	Empty	true
Fed	Uncharacterized protein C3H1.02c	06551fasting_2_800	Tityus2_.fasta	116.414,4	1	18	20	20	0.0124	0.239	LTNCKEDVTFDPLLQEIPYSFHLDDINTK	R	F	0.997	85.8	25	85.8	10.1	1	0	0	0	2	3465.69			323254	527	555	Empty	true
Fed	Uncharacterized protein C3H1.02c	06551fasting_2_800	Tityus2_.fasta	116.414,4	1	18	20	20	0.0124	0.239	NCLVNEFIDKNEASVAHVSIR	R	S	0.997	175	25	175	13.9	1	0	0	0	2	2415.21			1037000	907	927	Empty	true
Fed	Uncharacterized protein C3H1.02c	06551fasting_2_800	Tityus2_.fasta	116.414,4	1	18	20	20	0.0124	0.239	QFYRPENLCIIITGK	R	I	0.997	57.9	25	24.5	4.96	1	0	0	0	2	1851.98			161728	208	222	Empty	true
Fed	Uncharacterized protein C3H1.02c	06551fasting_2_800	Tityus2_.fasta	116.414,4	1	18	20	20	0.0124	0.239	QKELLGEDGLKAKDELFQAAR	K	K	0.997	0	0	0	8.47	1	0	0	0	2	2359.26			842762	476	496	Empty	true
Fed	Uncharacterized protein C3H1.02c	06551fasting_2_800	Tityus2_.fasta	116.414,4	1	18	20	20	0.0124	0.239	RLTNCKEDVTFDPLLQEIPYSFHLDDINTK	R	F	0.997	0	0	0	8.64	1	0	0	0	2	3621.79			140916	526	555	Empty	true
Fed	Uncharacterized protein C3H1.02c	06551fasting_2_800	Tityus2_.fasta	116.414,4	1	18	20	20	0.0124	0.239	SLESNPDKVINDLEELR	K	N	0.997	121	25	119	11.7	1	0	0	0	2	1971			420420	719	735	Empty	true
Fed	Uncharacterized protein C3H1.02c	06551fasting_2_800	Tityus2_.fasta	116.414,4	1	18	20	20	0.0124	0.239	SLESNPDKVINDLEELRNMLVQPK	K	N	0.997	146	37.9	0	11.7	2	0	0	0	2	2781.41			1784570	719	742	Empty	true
Fed	Uncharacterized protein C3H1.02c	06551fasting_2_800	Tityus2_.fasta	116.414,4	1	18	20	20	0.0124	0.239	TFLNQIFK	K	V	0.997	49.3	26.3	39.4	2.04	1	0	0	0	2	1010.57			399458	944	951	Empty	true
Fed	Uncharacterized protein C3H1.02c	06551fasting_2_800	Tityus2_.fasta	116.414,4	1	18	20	20	0.0124	0.239	VTIEDLQSVGTK	K	Y	0.997	51.7	27.8	49.6	4.08	1	0	0	0	2	1289.69			788809	952	963	Empty	true
Fed	Uncharacterized protein C3H1.02c	06551fasting_2_800	Tityus2_.fasta	116.414,4	1	18	20	20	0.0124	0.239	YVDNLFNGKEQWDELLFESSR	K	N	0.997	181	25	181	18.9	1	0	0	0	2	2589.23			443694	886	906	Empty	true
Fed	Hemocyanin C chain	10961fasting_2_31159	Tityus2_.fasta	73.317,4	0.824	1	1	1	0.00062	0.077	AEDSSVTLSKEPTFSELLKGKDTSKN	K	A	0.979	0	0	0	0.796	1	0	0	0	1	2811.43			1132320	510	535	Empty	true
Fed	Hemocyanin C chain	10961fasting_2_31159	Tityus2_.fasta	73.317,4	0.824	1	1	1	0.00062	0.077	AMGFPFDR	R	R	0.997	49.7	27	43.3	1.92	1	0	0	0	2	9404346			658474	602	609	Empty	false	10353fasting_2_29561
Fed	Hemocyanin C chain	10961fasting_2_31159	Tityus2_.fasta	73.317,4	0.824	1	1	1	0.00062	0.077	KGELFYYMHQQMCAR	R	Y	0.997	48	25	43.8	5.15	2	0	0	0	2	1993.87			1927200	200	214	Empty	false	10353fasting_2_29561,10939fasting_3_31133,27819fed_3_26963,04165fasting_1_16742,10999fasting_2_31207
Fed	Myosin heavy chain, muscle	03841fasting_3_15996	Tityus2_.fasta	51.572,1	1	4	4	5	0.0031	0.211	ADLAREIDELSERLEEAGGATSAQIDLNK	R	R	0.997	93.2	38.3	0	0	1	0	0	0	2	3128.57			2104480	134	162	Empty	false	20301fed_2_13529
Fed	Myosin heavy chain, muscle	03841fasting_3_15996	Tityus2_.fasta	51.572,1	1	4	4	5	0.0031	0.211	AKLEQTLDELEDSLER	K	E	0.997	54.9	25.6	54.9	6.38	1	0	0	0	2	1888.95			411639	22	37	Empty	true
Fed	Myosin heavy chain, muscle	03841fasting_3_15996	Tityus2_.fasta	51.572,1	1	4	4	5	0.0031	0.211	AKLEQTLDELEDSLEREK	K	K	0.997	0	0	0	9.32	2	0	0	0	2	2146.09			917464	22	39	Empty	true
Fed	Myosin heavy chain, muscle	03841fasting_3_15996	Tityus2_.fasta	51.572,1	1	4	4	5	0.0031	0.211	AKLEQTLDELEDSLEREKK	K	L	0.997	0	0	0	8.66	1	0	0	0	2	2274.18			622510	22	40	Empty	true
Fed	Myosin heavy chain, muscle	03841fasting_3_15996	Tityus2_.fasta	51.572,1	1	4	4	5	0.0031	0.211	IEELEEELEAER	R	Q	0.985	65.6	37.5	16.5	0	1	0	0	0	2	1474.69			1659350	112	123	Empty	false	20301fed_2_13529,01027fasting_2_11482,25375fed_1_21866
Fed	Myosin heavy chain, muscle	03841fasting_3_15996	Tityus2_.fasta	51.572,1	1	4	4	5	0.0031	0.211	KKELEQTIQRK	N	D	0.97	0	0	0	0.77	1	0	0	0	1	1400.82			205567	70	80	Empty	true
Fed	Myosin heavy chain, muscle	03841fasting_3_15996	Tityus2_.fasta	51.572,1	1	4	4	5	0.0031	0.211	LEDEQSLVAK	K	L	0.997	67.3	28.9	53.4	1.55	1	0	0	0	2	1131.59			298729	91	100	Empty	false	01027fasting_2_11482,25375fed_1_21866
Fed	Myosin heavy chain, muscle	03841fasting_3_15996	Tityus2_.fasta	51.572,1	1	4	4	5	0.0031	0.211	QLEDAESQVSQLSK	R	L	0.997	71.9	38.7	0	0	2	0	0	0	2	1575.79			9058440	287	300	Empty	false	20301fed_2_13529
Fed	Ovostatin	06146fasting_1_496	Tityus2_.fasta	75.909,7	0.976	1	1	1	0.00062	0.0191	LLDTAEYVRPYQK	R	T	0.997	72.4	25.8	64.8	3.22	1	0	0	0	2	1595.84			1133480	8	20	Empty	true
Fed	unknown protein	06548fasting_1_798	Tityus2_.fasta	23.163,4	1	3	3	4	0.00248	0.239	AFSSVDMWVDNKR	R	Q	0.997	86.8	26.1	86.8	5.64	1	0	0	0	2	1554.74			1607080	145	157	Empty	true
Fed	unknown protein	06548fasting_1_798	Tityus2_.fasta	23.163,4	1	3	3	4	0.00248	0.239	EWLRPLGFSIR	K	R	0.997	55	26.3	53.5	3.02	1	0	0	0	2	1373.77			446152	63	73	Empty	true
Fed	unknown protein	06548fasting_1_798	Tityus2_.fasta	23.163,4	1	3	3	4	0.00248	0.239	KFPDFEEFEAFSVNIEHTLPNQR	R	A	0.997	190	25	186	21.3	2	0	0	0	2	2794.35			577352	122	144	Empty	true
Fed	Alpha-2-macroglobulin	23681fed_1_2	Tityus2_.fasta	88.588,8	0.95	1	1	1	0.00062	0.034	FSLTQWFSATGHNLQIEPVSSAVECGK	R	L	0.997	171	25	171	16.9	1	0	0	0	2	2993.45			390966	61	87	Empty	true
Fed	Filamin-A	06594fasting_3_840	Tityus2_.fasta	237.867,5	1	24	26	28	0.0174	0.181	AFGPGLEHGIVNQVNTFTVETK	K	G	0.997	84.7	25	84.7	10.7	1	0	0	0	2	2358.21			376510	940	961	Empty	true
Fed	Filamin-A	06594fasting_3_840	Tityus2_.fasta	237.867,5	1	24	26	28	0.0174	0.181	AGGNAPLNVTIADEEYRPVDLK	K	I	0.997	72.3	25	72.3	4.52	1	0	0	0	2	2342.2			3356740	674	695	Empty	true
Fed	Filamin-A	06594fasting_3_840	Tityus2_.fasta	237.867,5	1	24	26	28	0.0174	0.181	AQTPTHFNIDCR	K	D	0.997	72.8	25	72.8	3.92	2	0	0	0	2	1459.67			2657430	758	769	Empty	true
Fed	Filamin-A	06594fasting_3_840	Tityus2_.fasta	237.867,5	1	24	26	28	0.0174	0.181	AVGALVDAVAPGLCPDWPDWTPANALK	R	N	0.997	63.4	25	63.4	8.77	1	0	0	0	2	2804.41			115673	171	197	Empty	true
Fed	Filamin-A	06594fasting_3_840	Tityus2_.fasta	237.867,5	1	24	26	28	0.0174	0.181	DALPVTDVGSQCKLTYKLPGTN	R	A	0.971	0	0	0	1.07	2	0	0	0	1	2377.21			2286830	1699	1720	Empty	true
Fed	Filamin-A	06594fasting_3_840	Tityus2_.fasta	237.867,5	1	24	26	28	0.0174	0.181	EVPKSPFSVMVEGHAGDPKKVTASGPGLEPTG	K	V	0.966	0	0	0	0.721	1	0	0	0	1	3205.62			925832	338	369	Empty	true
Fed	Filamin-A	06594fasting_3_840	Tityus2_.fasta	237.867,5	1	24	26	28	0.0174	0.181	FADQHIPGSPFKIPVTQDVDASK	K	V	0.997	73.4	25	73.4	9.33	1	0	0	0	2	2497.27			365911	1008	1030	Empty	true
Fed	Filamin-A	06594fasting_3_840	Tityus2_.fasta	237.867,5	1	24	26	28	0.0174	0.181	GAGSGGLGLAIEGPSEAK	K	M	0.997	129	38.7	0	0	1	0	0	0	2	1584.82			647661	962	979	Empty	true
Fed	Filamin-A	06594fasting_3_840	Tityus2_.fasta	237.867,5	1	24	26	28	0.0174	0.181	IKVDGLEPSVFLDSPTDFIVDAR	K	A	0.997	111	25	109	9.37	1	0	0	0	2	2533.32			334021	841	863	Empty	true
Fed	Filamin-A	06594fasting_3_840	Tityus2_.fasta	237.867,5	1	24	26	28	0.0174	0.181	KIADDVHRCEYVAQTVGVHSVN	R	V	0.967	0	0	0	0.921	1	0	0	0	1	2497.23			2906930	410	431	Empty	true
Fed	Filamin-A	06594fasting_3_840	Tityus2_.fasta	237.867,5	1	24	26	28	0.0174	0.181	LIALVEVLSGK	R	K	0.997	70.7	25	63.4	0	1	0	0	0	2	1141.72			627189	51	61	Empty	true
Fed	Filamin-A	06594fasting_3_840	Tityus2_.fasta	237.867,5	1	24	26	28	0.0174	0.181	LIALVEVLSGKK	R	L	0.997	89	25	81.4	2.72	1	0	0	0	2	1269.81			288993	51	62	Empty	true
Fed	Filamin-A	06594fasting_3_840	Tityus2_.fasta	237.867,5	1	24	26	28	0.0174	0.181	LPDVPINNFTSDWNDGR	K	A	0.997	96.2	25	93.3	8.32	1	0	0	0	2	1959.92			579008	154	170	Empty	true
Fed	Filamin-A	06594fasting_3_840	Tityus2_.fasta	237.867,5	1	24	26	28	0.0174	0.181	LPVAPGEYKIMVK	Y	F	0.997	19.7	37.2	3.68	8.29	1	0	0	0	1	1444.82			154329	1474	1486	Empty	true
Fed	Filamin-A	06594fasting_3_840	Tityus2_.fasta	237.867,5	1	24	26	28	0.0174	0.181	NINNLETDLADGLR	K	L	0.997	92.9	26.6	91.4	4.04	1	0	0	0	2	1557.79			695270	37	50	Empty	true
Fed	Filamin-A	06594fasting_3_840	Tityus2_.fasta	237.867,5	1	24	26	28	0.0174	0.181	PASIPVEFTIDAK	V	D	0.971	0	0	0	1.17	1	0	0	0	1	1387.75			889053	1143	1155	Empty	true
Fed	Filamin-A	06594fasting_3_840	Tityus2_.fasta	237.867,5	1	24	26	28	0.0174	0.181	SQKLENVSVALK	I	F	0.997	102	37.3	79.4	7.19	1	0	0	0	1	1315.76			302194	74	85	Empty	true
Fed	Filamin-A	06594fasting_3_840	Tityus2_.fasta	237.867,5	1	24	26	28	0.0174	0.181	TDYFPEKVEAYGPGLQK	K	T	0.997	104	25.5	104	8.7	1	0	0	0	2	1941.96			3059420	640	656	Empty	true
Fed	Filamin-A	06594fasting_3_840	Tityus2_.fasta	237.867,5	1	24	26	28	0.0174	0.181	TGVVQNQPTEFTIDKRK	K	A	0.996	0	0	0	1.42	1	0	0	0	2	1961.05			1222790	657	673	Empty	true
Fed	Filamin-A	06594fasting_3_840	Tityus2_.fasta	237.867,5	1	24	26	28	0.0174	0.181	TVNKNINNLETDLADGLR	K	L	0.997	19.2	25	19.2	1.15	1	0	0	0	2	2000.04			230341	33	50	Empty	true
Fed	Filamin-A	06594fasting_3_840	Tityus2_.fasta	237.867,5	1	24	26	28	0.0174	0.181	VFTENAGDGVLNVK	K	V	0.997	95.3	27.3	93.5	8.37	1	0	0	0	2	1462.75			1567840	479	492	Empty	true
Fed	Filamin-A	06594fasting_3_840	Tityus2_.fasta	237.867,5	1	24	26	28	0.0174	0.181	VIGPGGAPEHVDVR	K	K	0.997	82.8	27.7	82.8	4.01	2	0	0	0	2	1402.74			4308790	493	506	Empty	true
Fed	Filamin-A	06594fasting_3_840	Tityus2_.fasta	237.867,5	1	24	26	28	0.0174	0.181	VQVSEPTDAGKVK	R	V	0.997	75.9	27	61.1	3.7	1	0	0	0	2	1357.73			92.784,1	734	746	Empty	true
Fed	Filamin-A	06594fasting_3_840	Tityus2_.fasta	237.867,5	1	24	26	28	0.0174	0.181	VTASGPGLEPTGVMIGRPTYFDIFTK	K	D	0.997	96.5	25	95.5	8.8	2	0	0	0	2	2754.42			793098	358	383	Empty	true
Fed	Phosphoribosylformylglycinamidine synthase	00735fasting_3_11189,24419fed_1_79	Tityus2_.fasta	145.611,0	1	9	9	10	0.0062	0.1	AELDFNAVQR	K	G	0.997	49.4	28.9	46.7	1.96	1	0	0	0	2	1162.59			378085	482	491	Empty	true
Fed	Phosphoribosylformylglycinamidine synthase	00735fasting_3_11189,24419fed_1_79	Tityus2_.fasta	145.611,0	1	9	9	10	0.0062	0.1	ESHRPSSFITHSGVR	K	H	0.997	77.5	25.8	76.6	3.92	2	0	0	0	2	1696.85			508028	293	307	Empty	true
Fed	Phosphoribosylformylglycinamidine synthase	00735fasting_3_11189,24419fed_1_79	Tityus2_.fasta	145.611,0	1	9	9	10	0.0062	0.1	FATTDVNVK	K	S	0.997	59.1	28.9	48.1	3.03	1	0	0	0	2	9945204			421818	26	34	Empty	true
Fed	Phosphoribosylformylglycinamidine synthase	00735fasting_3_11189,24419fed_1_79	Tityus2_.fasta	145.611,0	1	9	9	10	0.0062	0.1	FGEPVILGFAR	K	S	0.997	71	27.7	69.8	6.07	1	0	0	0	2	1205.67			605123	401	411	Empty	true
Fed	Phosphoribosylformylglycinamidine synthase	00735fasting_3_11189,24419fed_1_79	Tityus2_.fasta	145.611,0	1	9	9	10	0.0062	0.1	GLLDPAAGAR	K	M	0.997	36.6	26.8	25.7	0.699	1	0	0	0	2	9405212			1057630	723	732	Empty	true
Fed	Phosphoribosylformylglycinamidine synthase	00735fasting_3_11189,24419fed_1_79	Tityus2_.fasta	145.611,0	1	9	9	10	0.0062	0.1	HLAMMPHPER	R	C	0.997	74.5	26.9	65	8.35	1	0	0	0	2	1218.59			287474	1273	1282	Empty	true
Fed	Phosphoribosylformylglycinamidine synthase	00735fasting_3_11189,24419fed_1_79	Tityus2_.fasta	145.611,0	1	9	9	10	0.0062	0.1	IGVGGGSASSVHVQGDQK	R	A	0.997	148	26.3	143	10.4	1	0	0	0	2	1682.85			459732	464	481	Empty	true
Fed	Phosphoribosylformylglycinamidine synthase	00735fasting_3_11189,24419fed_1_79	Tityus2_.fasta	145.611,0	1	9	9	10	0.0062	0.1	LGGSALAQCFNQLGDNTADLDSPELLR	R	T	0.997	136	25	136	24.1	1	0	0	0	2	2875.39			348771	854	880	Empty	true
Fed	Phosphoribosylformylglycinamidine synthase	00735fasting_3_11189,24419fed_1_79	Tityus2_.fasta	145.611,0	1	9	9	10	0.0062	0.1	MSVAEAVTNLMFAPISSLKDAK	R	C	0.997	134	25	134	9.08	1	0	0	0	2	2323.2			351249	733	754	Empty	true
Fed	Ras GTPase-activating protein 3	17523fed_1_10020	Tityus2_.fasta	95.851,0	0.907	1	1	2	0.00124	0.00839	KIVSFLK	R	A	0.988	45	25	0	2.3	2	0	0	0	2	8345448			17271300	347	353	Empty	true
Fed	unknown protein	05978fasting_2_363	Tityus2_.fasta	75.890,9	1	2	2	2	0.00124	0.0469	GAQILISDGNTR	K	F	0.997	51.5	27.9	23.6	2.09	1	0	0	0	2	1244.66			818069	292	303	Empty	true
Fed	unknown protein	05978fasting_2_363	Tityus2_.fasta	75.890,9	1	2	2	2	0.00124	0.0469	SLVLDITKLEDIPELYLTAK	K	S	0.997	69	25	69	6.47	1	0	0	0	2	2274.28			111926	513	532	Empty	true
Fed	Fumarylacetoacetase	15148fasting_3_4542	Tityus2_.fasta	50.929,5	0.95	1	1	1	0.00062	0.0417	ASSVVVSGTPIHRPHGQTR	R	A	0.997	35.8	25	35.8	3.77	1	0	0	0	2	1986.06			219797	163	181	Empty	true
Fed	Tumor necrosis factor alpha-induced protein 8-like protein	16039fasting_1_5834	Tityus2_.fasta	21.541,8	1	2	2	2	0.00124	0.0745	LNNCRSLLKDLVVR	S	H	0.985	0	0	0	2.08	1	0	0	0	1	1699.96			279388	122	135	Empty	true
Fed	Tumor necrosis factor alpha-induced protein 8-like protein	16039fasting_1_5834	Tityus2_.fasta	21.541,8	1	2	2	2	0.00124	0.0745	SLLKDLVVR	R	H	0.997	47.7	25.7	33	0.854	1	0	0	0	2	1042.66			605925	127	135	Empty	true
Fed	Hemocyanin F chain	02750fasting_2_13777,19977fed_1_12930	Tityus2_.fasta	72.730,8	1	35	40	56	0.0347	0.743	DDKYPDKKPMGFPFDR	K	T	0.997	22.8	38	0	3.03	2	0	0	0	2	1955.97			2801230	584	599	Empty	true
Fed	Hemocyanin F chain	02750fasting_2_13777,19977fed_1_12930	Tityus2_.fasta	72.730,8	1	35	40	56	0.0347	0.743	DFNDFIHLCEQAR	K	D	0.997	80	25	80	10.1	2	0	0	0	2	1664.75			1678290	69	81	Empty	true
Fed	Hemocyanin F chain	02750fasting_2_13777,19977fed_1_12930	Tityus2_.fasta	72.730,8	1	35	40	56	0.0347	0.743	DLKEVAVQDMER	R	W	0.997	98	27	88.4	4.57	4	0	0	0	2	1432.71			6253010	258	269	Empty	true
Fed	Hemocyanin F chain	02750fasting_2_13777,19977fed_1_12930	Tityus2_.fasta	72.730,8	1	35	40	56	0.0347	0.743	DVVNEGLFVFAVSVAILHRDDCR	R	G	0.997	78.2	25	78.2	8.8	1	0	0	0	2	2631.33			110424	82	104	Empty	true
Fed	Hemocyanin F chain	02750fasting_2_13777,19977fed_1_12930	Tityus2_.fasta	72.730,8	1	35	40	56	0.0347	0.743	DYYGSLHNWGHVMMAR	R	L	0.997	82.3	25	82.3	5.15	2	0	0	0	2	1936.86			1837080	316	331	Empty	true
Fed	Hemocyanin F chain	02750fasting_2_13777,19977fed_1_12930	Tityus2_.fasta	72.730,8	1	35	40	56	0.0347	0.743	EELNFPEVEIVNATVNAK	K	V	0.997	104	25	100	11.1	1	0	0	0	2	2016.03			198799	382	399	Empty	true
Fed	Hemocyanin F chain	02750fasting_2_13777,19977fed_1_12930	Tityus2_.fasta	72.730,8	1	35	40	56	0.0347	0.743	ENPGVMSDTSTSLRDPIFYR	K	W	0.997	61	25	61	3.89	1	0	0	0	2	2285.09			1407750	341	360	Empty	false	10353fasting_2_29561,10337fasting_2_29538,27819fed_3_26963,04165fasting_1_16742,29086fed_2_1376
Fed	Hemocyanin F chain	02750fasting_2_13777,19977fed_1_12930	Tityus2_.fasta	72.730,8	1	35	40	56	0.0347	0.743	ETGNILDPEYNLAYFR	K	E	0.997	52.8	25	50	3.48	1	0	0	0	2	1914.92			383822	147	162	Empty	true
Fed	Hemocyanin F chain	02750fasting_2_13777,19977fed_1_12930	Tityus2_.fasta	72.730,8	1	35	40	56	0.0347	0.743	ETGNILDPEYNLAYFREDVEVNAHHWHWHCVYPATWR	K	S	0.997	171	25	171	14.8	2	0	0	0	2	4625.13			873191	147	183	Empty	true
Fed	Hemocyanin F chain	02750fasting_2_13777,19977fed_1_12930	Tityus2_.fasta	72.730,8	1	35	40	56	0.0347	0.743	FHKELQPGKNTITR	K	K	0.997	0	0	0	4.96	1	0	0	0	2	1668.92			35.713,5	485	498	Empty	true
Fed	Hemocyanin F chain	02750fasting_2_13777,19977fed_1_12930	Tityus2_.fasta	72.730,8	1	35	40	56	0.0347	0.743	FIDNIFQDYK	R	D	0.997	51.6	27.5	41.1	3.49	1	0	0	0	2	1302.64			356687	364	373	Empty	true	10999fasting_2_31207
Fed	Hemocyanin F chain	02750fasting_2_13777,19977fed_1_12930	Tityus2_.fasta	72.730,8	1	35	40	56	0.0347	0.743	FIDNIFQDYKDTLPSYTK	R	E	0.997	120	25	117	8.7	1	0	0	0	2	2208.09			647954	364	381	Empty	true
Fed	Hemocyanin F chain	02750fasting_2_13777,19977fed_1_12930	Tityus2_.fasta	72.730,8	1	35	40	56	0.0347	0.743	FIPAETINAALK	R	A	0.997	49.3	26	39.8	1.68	1	0	0	0	2	1287.73			6086480	119	130	Empty	true
Fed	Hemocyanin F chain	02750fasting_2_13777,19977fed_1_12930	Tityus2_.fasta	72.730,8	1	35	40	56	0.0347	0.743	GEGLSEDNTEFCSCGWPQHMLLPR	K	G	0.997	194	25	194	13.7	1	0	0	0	2	2820.22			838512	519	542	Empty	true
Fed	Hemocyanin F chain	02750fasting_2_13777,19977fed_1_12930	Tityus2_.fasta	72.730,8	1	35	40	56	0.0347	0.743	GKLFSCFHAEHLAEAQYLYETLYAAK	R	D	0.997	63.4	25	63.4	11.1	2	0	0	0	2	3060.49			627079	43	68	Empty	true
Fed	Hemocyanin F chain	02750fasting_2_13777,19977fed_1_12930	Tityus2_.fasta	72.730,8	1	35	40	56	0.0347	0.743	GVTVPPIQEIFPDR	R	F	0.997	70.5	25.7	67.6	1.11	1	0	0	0	2	1567.85			1520620	105	118	Empty	true	10353fasting_2_29561
Fed	Hemocyanin F chain	02750fasting_2_13777,19977fed_1_12930	Tityus2_.fasta	72.730,8	1	35	40	56	0.0347	0.743	GVTVPPIQEIFPDRFIPAETINAALK	R	A	0.997	48.8	25	28.3	2.96	1	0	0	0	2	2836.56			2609080	105	130	Empty	true
Fed	Hemocyanin F chain	02750fasting_2_13777,19977fed_1_12930	Tityus2_.fasta	72.730,8	1	35	40	56	0.0347	0.743	HFFIELDKFHK	R	E	0.997	58	26.8	44.2	2.89	1	0	0	0	2	1460.77			1536040	477	487	Empty	true
Fed	Hemocyanin F chain	02750fasting_2_13777,19977fed_1_12930	Tityus2_.fasta	72.730,8	1	35	40	56	0.0347	0.743	HFFIELDKFHKELQPGK	R	N	0.997	0	0	0	10.6	3	0	0	0	2	2113.12			2290530	477	493	Empty	true
Fed	Hemocyanin F chain	02750fasting_2_13777,19977fed_1_12930	Tityus2_.fasta	72.730,8	1	35	40	56	0.0347	0.743	IFLGPKYDELGNR	R	L	0.997	96.8	26.7	84.2	3.48	1	0	0	0	2	1521.81			3415990	457	469	Empty	true	10353fasting_2_29561
Fed	Hemocyanin F chain	02750fasting_2_13777,19977fed_1_12930	Tityus2_.fasta	72.730,8	1	35	40	56	0.0347	0.743	IIPLFEHLTSLTR	R	K	0.997	70.5	25	61.2	6.22	3	0	0	0	2	1539.89			1470230	10	22	Empty	true
Fed	Hemocyanin F chain	02750fasting_2_13777,19977fed_1_12930	Tityus2_.fasta	72.730,8	1	35	40	56	0.0347	0.743	IIPLFEHLTSLTRK	R	K	0.997	53.9	25	53.9	2.7	1	0	0	0	2	1667.98			295959	10	23	Empty	true
Fed	Hemocyanin F chain	02750fasting_2_13777,19977fed_1_12930	Tityus2_.fasta	72.730,8	1	35	40	56	0.0347	0.743	ILDSIHLGTIIDDEGNEIPLDAQHGIDILGDLMESSEESK	R	N	0.997	61.8	25	61.8	9.28	1	0	0	0	2	4332.11			126750	274	313	Empty	true
Fed	Hemocyanin F chain	02750fasting_2_13777,19977fed_1_12930	Tityus2_.fasta	72.730,8	1	35	40	56	0.0347	0.743	ILDSIHLGTIIDDEGNEIPLDAQHGIDILGDLMESSEESKNR	R	D	0.997	130	25	130	11.7	2	0	0	0	2	4602.25			6587090	274	315	Empty	true
Fed	Hemocyanin F chain	02750fasting_2_13777,19977fed_1_12930	Tityus2_.fasta	72.730,8	1	35	40	56	0.0347	0.743	KSDESSVTISHVPTVEELKK	R	G	0.997	0	0	0	13.9	4	0	0	0	2	2213.17			4800150	499	518	Empty	true
Fed	Hemocyanin F chain	02750fasting_2_13777,19977fed_1_12930	Tityus2_.fasta	72.730,8	1	35	40	56	0.0347	0.743	LFSCFHAEHLAEAQYLYETLYAAK	K	D	0.997	50.8	25	50.8	4.89	1	0	0	0	2	2875.38			287627	45	68	Empty	true
Fed	Hemocyanin F chain	02750fasting_2_13777,19977fed_1_12930	Tityus2_.fasta	72.730,8	1	35	40	56	0.0347	0.743	MTPFHNFEEELEGYSPHLTSLISGLNYASRPSGLAMR	R	D	0.997	244	25	244	20.6	5	0	0	0	2	4152			2901750	221	257	Empty	true
Fed	Hemocyanin F chain	02750fasting_2_13777,19977fed_1_12930	Tityus2_.fasta	72.730,8	1	35	40	56	0.0347	0.743	NMSYTDVIIQFKEHVEQ	K	-	0.997	67.1	38.7	0	7.36	2	0	0	0	2	2081			804126	613	629	Empty	true
Fed	Hemocyanin F chain	02750fasting_2_13777,19977fed_1_12930	Tityus2_.fasta	72.730,8	1	35	40	56	0.0347	0.743	SDESSVTISHVPTVEELKK	K	G	0.997	97.6	25	97.6	7.7	1	0	0	0	2	2085.07			1070670	500	518	Empty	true
Fed	Hemocyanin F chain	02750fasting_2_13777,19977fed_1_12930	Tityus2_.fasta	72.730,8	1	35	40	56	0.0347	0.743	TGPDSIYVEIK	R	E	0.997	100	28	91	3.28	1	0	0	0	2	1221.64			1578980	136	146	Empty	true
Fed	Hemocyanin F chain	02750fasting_2_13777,19977fed_1_12930	Tityus2_.fasta	72.730,8	1	35	40	56	0.0347	0.743	TIADFVTK	R	N	0.997	50.4	28.4	41.4	3.04	1	0	0	0	2	8944932			1951290	605	612	Empty	true
Fed	Hemocyanin F chain	02750fasting_2_13777,19977fed_1_12930	Tityus2_.fasta	72.730,8	1	35	40	56	0.0347	0.743	VPNVINTYIR	K	E	0.997	44.2	27.6	35.8	4.08	1	0	0	0	2	1188.67			2125110	400	409	Empty	true
Fed	Hemocyanin F chain	02750fasting_2_13777,19977fed_1_12930	Tityus2_.fasta	72.730,8	1	35	40	56	0.0347	0.743	VPNVINTYIREDALELSYGINLK	K	G	0.997	103	25	103	12.9	1	0	0	0	2	2634.41			368794	400	422	Empty	true
Fed	Hemocyanin F chain	02750fasting_2_13777,19977fed_1_12930	Tityus2_.fasta	72.730,8	1	35	40	56	0.0347	0.743	YDCDRLSVGLR	R	R	0.997	77.8	27.1	73.8	2.54	1	0	0	0	2	1353.66			2099240	209	219	Empty	true
Fed	Hemocyanin F chain	02750fasting_2_13777,19977fed_1_12930	Tityus2_.fasta	72.730,8	1	35	40	56	0.0347	0.743	YDCDRLSVGLRR	R	M	0.987	0	0	0	1.66	1	0	0	0	2	1509.76			1204520	209	220	Empty	true
Fed	Hemocyanin F chain	02750fasting_2_13777,19977fed_1_12930	Tityus2_.fasta	72.730,8	1	35	40	56	0.0347	0.743	YDELGNR	K	L	0.988	32.7	28.1	14.1	0.854	1	0	0	0	2	8664003			24.505,5	463	469	Empty	true	10353fasting_2_29561
Fed	Hemocyanin AA6 chain	04165fasting_1_16742,27819fed_3_26963	Tityus2_.fasta	71.668,1	1	34	39	46	0.0285	0.752	DAIYPDKKPMGFPFDRPIHVR	K	N	0.997	115	25	115	7.85	2	0	0	0	2	2499.3			2101630	584	604	Empty	true
Fed	Hemocyanin AA6 chain	04165fasting_1_16742,27819fed_3_26963	Tityus2_.fasta	71.668,1	1	34	39	46	0.0285	0.752	DFDDFYLLAK	K	Q	0.997	41.8	26.9	41.6	1.66	1	0	0	0	2	1246.6			397191	69	78	Empty	true
Fed	Hemocyanin AA6 chain	04165fasting_1_16742,27819fed_3_26963	Tityus2_.fasta	71.668,1	1	34	39	46	0.0285	0.752	DLDEATKLYEILYHAK	K	D	0.997	98.8	25.1	98.8	5.6	1	0	0	0	2	1921.99			374829	53	68	Empty	true
Fed	Hemocyanin AA6 chain	04165fasting_1_16742,27819fed_3_26963	Tityus2_.fasta	71.668,1	1	34	39	46	0.0285	0.752	DLKDVDVQDMER	R	W	0.997	55.7	25.8	47.9	4.03	2	0	0	0	2	1462.68			2581120	257	268	Empty	true
Fed	Hemocyanin AA6 chain	04165fasting_1_16742,27819fed_3_26963	Tityus2_.fasta	71.668,1	1	34	39	46	0.0285	0.752	EANNNPNSDVVVEVEETGNILDPEYK	K	L	0.997	108	25	108	8.13	1	0	0	0	2	2888.34			230322	131	156	Empty	true
Fed	Hemocyanin AA6 chain	04165fasting_1_16742,27819fed_3_26963	Tityus2_.fasta	71.668,1	1	34	39	46	0.0285	0.752	EDIGTNAHHWHWHIVYPATWK	R	E	0.997	109	25	109	7.08	1	0	0	0	2	2598.24			256808	162	182	Empty	true
Fed	Hemocyanin AA6 chain	04165fasting_1_16742,27819fed_3_26963	Tityus2_.fasta	71.668,1	1	34	39	46	0.0285	0.752	EQIDFPGVEVTNVTVNAK	R	K	0.997	99.4	25	99.4	7.08	2	0	0	0	2	1960			1382550	381	398	Empty	true
Fed	Hemocyanin AA6 chain	04165fasting_1_16742,27819fed_3_26963	Tityus2_.fasta	71.668,1	1	34	39	46	0.0285	0.752	FDELGNVLDVNEQRR	K	L	0.997	67.7	26.1	67.1	5.68	1	0	0	0	2	1803.9			1319640	464	478	Empty	true
Fed	Hemocyanin AA6 chain	04165fasting_1_16742,27819fed_3_26963	Tityus2_.fasta	71.668,1	1	34	39	46	0.0285	0.752	FNENPGVMSDTSTSLRDPIFYR	R	W	0.997	78.9	25	75.5	5.92	2	0	0	0	2	2546.2			4491500	338	359	Empty	true
Fed	Hemocyanin AA6 chain	04165fasting_1_16742,27819fed_3_26963	Tityus2_.fasta	71.668,1	1	34	39	46	0.0285	0.752	FVDNIFQDYK	R	A	0.997	77.7	27.4	68.3	2.89	1	0	0	0	2	1288.62			2112870	363	372	Empty	true
Fed	Hemocyanin AA6 chain	04165fasting_1_16742,27819fed_3_26963	Tityus2_.fasta	71.668,1	1	34	39	46	0.0285	0.752	FVDNIFQDYKATLHPYTR	R	E	0.997	122	25	122	9.08	2	0	0	0	2	2228.11			1176130	363	380	Empty	true
Fed	Hemocyanin AA6 chain	04165fasting_1_16742,27819fed_3_26963	Tityus2_.fasta	71.668,1	1	34	39	46	0.0285	0.752	FVPAETVNLAIK	R	E	0.997	70	25.6	62	4.47	1	0	0	0	2	1301.75			3380330	119	130	Empty	true
Fed	Hemocyanin AA6 chain	04165fasting_1_16742,27819fed_3_26963	Tityus2_.fasta	71.668,1	1	34	39	46	0.0285	0.752	GSLFSCFHAK	R	D	0.997	84	27	75.1	4.85	1	0	0	0	2	1153.55			1733640	43	52	Empty	true
Fed	Hemocyanin AA6 chain	04165fasting_1_16742,27819fed_3_26963	Tityus2_.fasta	71.668,1	1	34	39	46	0.0285	0.752	GVTVPPIQEVFPDR	K	F	0.997	63	25.3	53.3	2.89	1	0	0	0	2	1553.83			523050	105	118	Empty	true
Fed	Hemocyanin AA6 chain	04165fasting_1_16742,27819fed_3_26963	Tityus2_.fasta	71.668,1	1	34	39	46	0.0285	0.752	GVTVPPIQEVFPDRFVPAETVNLAIK	K	E	0.997	75.9	25	53.3	6	1	0	0	0	2	2836.56			969516	105	130	Empty	true
Fed	Hemocyanin AA6 chain	04165fasting_1_16742,27819fed_3_26963	Tityus2_.fasta	71.668,1	1	34	39	46	0.0285	0.752	IFLGPKFDELGNVLDVNEQR	R	R	0.997	89.3	25	85.4	8.44	1	0	0	0	2	2303.2			766539	458	477	Empty	true
Fed	Hemocyanin AA6 chain	04165fasting_1_16742,27819fed_3_26963	Tityus2_.fasta	71.668,1	1	34	39	46	0.0285	0.752	IFLGPKFDELGNVLDVNEQRR	R	L	0.997	0	0	0	7.89	1	0	0	0	2	2459.3			904563	458	478	Empty	true
Fed	Hemocyanin AA6 chain	04165fasting_1_16742,27819fed_3_26963	Tityus2_.fasta	71.668,1	1	34	39	46	0.0285	0.752	IHDPDGRFNENPGVMSDTSTSLRDPIFYR	R	W	0.997	19.7	37.6	7.32	4.92	1	0	0	0	2	3336.57			1235560	331	359	Empty	true
Fed	Hemocyanin AA6 chain	04165fasting_1_16742,27819fed_3_26963	Tityus2_.fasta	71.668,1	1	34	39	46	0.0285	0.752	ILDAIHLGHIHTSEDEEIALDEAHGADILGDIIESSAESR	R	N	0.997	115	25	115	11.5	2	0	0	0	2	4292.1			975587	273	312	Empty	true
Fed	Hemocyanin AA6 chain	04165fasting_1_16742,27819fed_3_26963	Tityus2_.fasta	71.668,1	1	34	39	46	0.0285	0.752	ILSLFEHLTSLTEK	R	Q	0.997	121	25	101	5.06	2	0	0	0	2	1630.91			1266060	10	23	Empty	true
Fed	Hemocyanin AA6 chain	04165fasting_1_16742,27819fed_3_26963	Tityus2_.fasta	71.668,1	1	34	39	46	0.0285	0.752	KGEGISEDATEFCSCGWPEHMLIPR	K	G	0.997	133	25	133	14.3	1	0	0	0	2	2906.29			448687	519	543	Empty	true
Fed	Hemocyanin AA6 chain	04165fasting_1_16742,27819fed_3_26963	Tityus2_.fasta	71.668,1	1	34	39	46	0.0285	0.752	KGELFYYMHQQMCAR	R	Y	0.997	48	25	43.8	5.15	2	0	0	0	2	1993.87			1927200	193	207	Empty	true	10353fasting_2_29561,10939fasting_3_31133,10961fasting_2_31159,10999fasting_2_31207
Fed	Hemocyanin AA6 chain	04165fasting_1_16742,27819fed_3_26963	Tityus2_.fasta	71.668,1	1	34	39	46	0.0285	0.752	KNNTIHTFIKDEELELSHGIR	K	F	0.997	0	0	0	14.2	2	0	0	0	2	2494.31			2670330	399	419	Empty	true
Fed	Hemocyanin AA6 chain	04165fasting_1_16742,27819fed_3_26963	Tityus2_.fasta	71.668,1	1	34	39	46	0.0285	0.752	LAGVGILKR	R	G	0.997	50.8	25	43.4	1.47	1	0	0	0	2	9266147			1125560	34	42	Empty	true
Fed	Hemocyanin AA6 chain	04165fasting_1_16742,27819fed_3_26963	Tityus2_.fasta	71.668,1	1	34	39	46	0.0285	0.752	LLCQDAVSYCGAK	K	D	0.997	73.7	25.1	66.1	3.3	1	0	0	0	2	1484.69			1516170	571	583	Empty	true
Fed	Hemocyanin AA6 chain	04165fasting_1_16742,27819fed_3_26963	Tityus2_.fasta	71.668,1	1	34	39	46	0.0285	0.752	LYIELDKFR	R	A	0.997	53.4	25.5	49.4	2.27	1	0	0	0	2	1196.67			729591	479	487	Empty	true
Fed	Hemocyanin AA6 chain	04165fasting_1_16742,27819fed_3_26963	Tityus2_.fasta	71.668,1	1	34	39	46	0.0285	0.752	MIPFHNFDEKLEGYAPHLTSLISGLQYGSRPR	R	G	0.997	138	25	138	7.6	2	0	0	0	2	3673.86			765855	220	251	Empty	true
Fed	Hemocyanin AA6 chain	04165fasting_1_16742,27819fed_3_26963	Tityus2_.fasta	71.668,1	1	34	39	46	0.0285	0.752	NLQEFLTPNIHVTDIDIK	R	F	0.997	66	25	65.9	5.24	1	0	0	0	2	2110.12			388538	605	622	Empty	true
Fed	Hemocyanin AA6 chain	04165fasting_1_16742,27819fed_3_26963	Tityus2_.fasta	71.668,1	1	34	39	46	0.0285	0.752	NLQEFLTPNIHVTDIDIKFDG	R	-	0.997	105	25	105	9.05	1	0	0	0	2	2429.24			1406380	605	625	Empty	true
Fed	Hemocyanin AA6 chain	04165fasting_1_16742,27819fed_3_26963	Tityus2_.fasta	71.668,1	1	34	39	46	0.0285	0.752	NNTIHTFIKDEELELSHGIR	K	F	0.997	76.4	25	75.7	5.29	1	0	0	0	2	2366.21			723841	400	419	Empty	true
Fed	Hemocyanin AA6 chain	04165fasting_1_16742,27819fed_3_26963	Tityus2_.fasta	71.668,1	1	34	39	46	0.0285	0.752	NQEFYGSLHNWGHVLMAR	R	I	0.997	119	25	119	7.82	3	0	0	0	2	2159.02			2923100	313	330	Empty	true
Fed	Hemocyanin AA6 chain	04165fasting_1_16742,27819fed_3_26963	Tityus2_.fasta	71.668,1	1	34	39	46	0.0285	0.752	RLYIELDKFR	R	A	0.997	0	0	0	3.48	1	0	0	0	2	1352.77			874488	478	487	Empty	true
Fed	Hemocyanin AA6 chain	04165fasting_1_16742,27819fed_3_26963	Tityus2_.fasta	71.668,1	1	34	39	46	0.0285	0.752	VKYHHLDHEPFSYTIDVNNTSGAAK	K	H	0.997	38.1	25	38.1	2.27	1	0	0	0	2	2843.37			1266760	428	452	Empty	true
Fed	Hemocyanin AA6 chain	04165fasting_1_16742,27819fed_3_26963	Tityus2_.fasta	71.668,1	1	34	39	46	0.0285	0.752	YHHLDHEPFSYTIDVNNTSGAAK	K	H	0.997	23.4	25	23.4	5.03	1	0	0	0	2	2616.21			1534300	430	452	Empty	true
Fed	Alpha-actinin, sarcomeric	00413fasting_3_10882,18069fed_2_10566	Tityus2_.fasta	103.705,6	1	12	14	17	0.0105	0.133	AKLETNFNTLQTK	K	L	0.997	130	26.5	124	9.74	3	0	0	0	2	1507.81			2873050	333	345	Empty	true
Fed	Alpha-actinin, sarcomeric	00413fasting_3_10882,18069fed_2_10566	Tityus2_.fasta	103.705,6	1	12	14	17	0.0105	0.133	ESTDSDTAEQIIDSFR	R	I	0.997	29.4	25	29.4	1.59	1	0	0	0	2	1813.81			713815	820	835	Empty	true
Fed	Alpha-actinin, sarcomeric	00413fasting_3_10882,18069fed_2_10566	Tityus2_.fasta	103.705,6	1	12	14	17	0.0105	0.133	IDQLHLEFAK	K	R	0.997	72.3	37	35.2	0	1	0	0	0	2	1198.68			157721	508	517	Empty	true
Fed	Alpha-actinin, sarcomeric	00413fasting_3_10882,18069fed_2_10566	Tityus2_.fasta	103.705,6	1	12	14	17	0.0105	0.133	KHEAFESDLAAHQDR	K	V	0.997	81.1	25	81.1	9.92	1	0	0	0	2	1753.83			288668	437	451	Empty	true
Fed	Alpha-actinin, sarcomeric	00413fasting_3_10882,18069fed_2_10566	Tityus2_.fasta	103.705,6	1	12	14	17	0.0105	0.133	LASDLLEWIR	R	R	0.997	78.6	27.1	66.3	3.89	1	0	0	0	2	1215.67			509591	283	292	Empty	true
Fed	Alpha-actinin, sarcomeric	00413fasting_3_10882,18069fed_2_10566	Tityus2_.fasta	103.705,6	1	12	14	17	0.0105	0.133	LASDLLEWIRR	R	T	0.997	57	25.2	45.3	4.54	2	0	0	0	2	1371.77			637195	283	293	Empty	true
Fed	Alpha-actinin, sarcomeric	00413fasting_3_10882,18069fed_2_10566	Tityus2_.fasta	103.705,6	1	12	14	17	0.0105	0.133	LERLDHLAQK	R	F	0.961	43.7	37.2	0	0	1	0	0	0	2	1236.71			296096	390	399	Empty	true
Fed	Alpha-actinin, sarcomeric	00413fasting_3_10882,18069fed_2_10566	Tityus2_.fasta	103.705,6	1	12	14	17	0.0105	0.133	LETNFNTLQTK	K	L	0.997	94.2	27.5	79.2	2.74	1	0	0	0	2	1308.68			1805760	335	345	Empty	true
Fed	Alpha-actinin, sarcomeric	00413fasting_3_10882,18069fed_2_10566	Tityus2_.fasta	103.705,6	1	12	14	17	0.0105	0.133	MVSDIANAWK	K	G	0.997	58.3	27.9	57.2	2.59	2	0	0	0	2	1150.56			4210620	361	370	Empty	true
Fed	Alpha-actinin, sarcomeric	00413fasting_3_10882,18069fed_2_10566	Tityus2_.fasta	103.705,6	1	12	14	17	0.0105	0.133	NINEVENQILTR	R	D	0.997	75.9	26.3	74.1	4.08	1	0	0	0	2	1442.76			3122950	728	739	Empty	true
Fed	Alpha-actinin, sarcomeric	00413fasting_3_10882,18069fed_2_10566	Tityus2_.fasta	103.705,6	1	12	14	17	0.0105	0.133	VGWEQLLTSIHR	R	N	0.997	91.6	38.2	81.4	0	1	0	0	0	2	1415.76			872804	716	727	Empty	true
Fed	Alpha-actinin, sarcomeric	00413fasting_3_10882,18069fed_2_10566	Tityus2_.fasta	103.705,6	1	12	14	17	0.0105	0.133	YTQYTMETLR	S	V	0.997	51.2	37.2	43.7	6.74	2	0	0	0	1	1305.61			2716920	706	715	Empty	true
Fed	Lysosomal alpha-mannosidase	28760fed_2_1025	Tityus2_.fasta	110.307,3	1	3	4	5	0.0031	0.0355	EALGVAQHHDAISGTAK	R	Q	0.997	103	25.5	100	3.74	2	0	0	0	2	1704.87			779866	372	388	Empty	true
Fed	Lysosomal alpha-mannosidase	28760fed_2_1025	Tityus2_.fasta	110.307,3	1	3	4	5	0.0031	0.0355	IPVQLSGYR	R	V	0.997	54.5	28.2	40	1.47	1	0	0	0	2	1032.58			780081	466	474	Empty	true
Fed	Lysosomal alpha-mannosidase	28760fed_2_1025	Tityus2_.fasta	110.307,3	1	3	4	5	0.0031	0.0355	QLTILNDR	L	S	0.974	33.6	36.7	8.48	1.21	2	0	0	0	1	9725474			2243770	735	742	Empty	true
Fed	Talin-1	25820fed_3_22706	Tityus2_.fasta	201.745,8	1	2	2	2	0.00124	0.0132	SGLVDLAQFAR	K	A	0.997	56.2	27.9	41.6	0.824	1	0	0	0	2	1176.64			280318	797	807	Empty	true
Fed	Talin-1	25820fed_3_22706	Tityus2_.fasta	201.745,8	1	2	2	2	0.00124	0.0132	TATNAAAAAGALKR	R	K	0.997	66.7	26.8	66.7	3.06	1	0	0	0	2	1286.72			111483	237	250	Empty	true
Fed	Catalase	24000fed_2_451	Tityus2_.fasta	53.914,3	0.95	1	1	1	0.00062	0.119	AAELSGSDPDYSIRDLYNAIR	K	S	0.997	110	25	110	6.43	2	0	0	0	2	2326.13			3369920	209	229	Empty	false	06540fasting_3_79
Fed	Catalase	24000fed_2_451	Tityus2_.fasta	53.914,3	0.95	1	1	1	0.00062	0.119	LGANFLQIPVNCPYR	R	A	0.997	58.4	26.1	56.6	0.921	1	0	0	0	2	1761.91			355531	325	339	Empty	false	06540fasting_3_79
Fed	Catalase	24000fed_2_451	Tityus2_.fasta	53.914,3	0.95	1	1	1	0.00062	0.119	NFTEVDSDFGKR	R	I	0.997	35.8	25.4	35.8	4.46	1	0	0	0	2	1414.66			2327620	440	451	Empty	true
Fed	Catalase	24000fed_2_451	Tityus2_.fasta	53.914,3	0.95	1	1	1	0.00062	0.119	WNPFDLTK	R	I	0.997	25	29.2	15.7	2.39	1	0	0	0	2	1020.51			762385	253	260	Empty	false	06540fasting_3_79
Fed	Spectrin alpha chain	24329fed_3_722	Tityus2_.fasta	279.318,6	1	44	47	55	0.0341	0.225	ALTLLRQEK	K	L	0.997	37	25.9	28.7	0.959	1	0	0	0	2	1071.65			169747	244	252	Empty	true
Fed	Spectrin alpha chain	24329fed_3_722	Tityus2_.fasta	279.318,6	1	44	47	55	0.0341	0.225	ATTDAGQMLLDEDHYATTEVKEK	R	L	0.997	63	25	61.4	8.28	2	0	0	0	2	2566.2			3077320	421	443	Empty	true
Fed	Spectrin alpha chain	24329fed_3_722	Tityus2_.fasta	279.318,6	1	44	47	55	0.0341	0.225	AVCQSGEDMIAEGHFAADEIHKR	R	V	0.997	131	25	131	10.5	1	0	0	0	2	2571.17			1456260	844	866	Empty	true
Fed	Spectrin alpha chain	24329fed_3_722	Tityus2_.fasta	279.318,6	1	44	47	55	0.0341	0.225	DADELESWIYEK	R	L	0.997	70.5	25	69.4	4.92	1	0	0	0	2	1497.67			650472	54	65	Empty	true
Fed	Spectrin alpha chain	24329fed_3_722	Tityus2_.fasta	279.318,6	1	44	47	55	0.0341	0.225	DVAGAEALLER	K	H	0.997	81.6	28.2	75.1	2.34	1	0	0	0	2	1143.6			1759400	394	404	Empty	true
Fed	Spectrin alpha chain	24329fed_3_722	Tityus2_.fasta	279.318,6	1	44	47	55	0.0341	0.225	FLADFRDLVSWIHDMK	R	T	0.997	58.1	25	58.1	6.89	1	0	0	0	2	1993			361065	368	383	Empty	true
Fed	Spectrin alpha chain	24329fed_3_722	Tityus2_.fasta	279.318,6	1	44	47	55	0.0341	0.225	GRDLIGVQNLIK	R	K	0.997	52.2	25	46	6.03	2	0	0	0	2	1325.79			2396890	815	826	Empty	true
Fed	Spectrin alpha chain	24329fed_3_722	Tityus2_.fasta	279.318,6	1	44	47	55	0.0341	0.225	GVEDIEIWLSEIEGQLLSEEYGKDLTSVQNLIK	R	K	0.997	153	25	153	19.8	2	0	0	0	2	3747.92			985358	688	720	Empty	true
Fed	Spectrin alpha chain	24329fed_3_722	Tityus2_.fasta	279.318,6	1	44	47	55	0.0341	0.225	HAEIVSNWEMLK	K	T	0.997	46.7	26.4	46.7	2.89	1	0	0	0	2	1456.73			873017	338	349	Empty	true
Fed	Spectrin alpha chain	24329fed_3_722	Tityus2_.fasta	279.318,6	1	44	47	55	0.0341	0.225	HQAMLAEINNHENR	K	V	0.997	105	25.5	105	6.62	1	0	0	0	2	1676.79			641219	828	841	Empty	true
Fed	Spectrin alpha chain	24329fed_3_722	Tityus2_.fasta	279.318,6	1	44	47	55	0.0341	0.225	HQAMLAEINNHENRVR	K	A	0.997	57.8	25	57.8	3.62	2	0	0	0	2	1947.96			644143	828	843	Empty	true
Fed	Spectrin alpha chain	24329fed_3_722	Tityus2_.fasta	279.318,6	1	44	47	55	0.0341	0.225	HQNFEQELNANK	K	S	0.997	84	25.5	77.3	3.32	2	0	0	0	2	1471.69			2680550	616	627	Empty	true
Fed	Spectrin alpha chain	24329fed_3_722	Tityus2_.fasta	279.318,6	1	44	47	55	0.0341	0.225	IDEITSTGQELIDSNHYASER	R	I	0.997	147	25	145	5.6	1	0	0	0	2	2378.11			3530030	630	650	Empty	true
Fed	Spectrin alpha chain	24329fed_3_722	Tityus2_.fasta	279.318,6	1	44	47	55	0.0341	0.225	KHEALMADLEAFGNTIR	K	S	0.997	49.6	25.2	49.1	2.36	1	0	0	0	2	1915.97			370180	933	949	Empty	true
Fed	Spectrin alpha chain	24329fed_3_722	Tityus2_.fasta	279.318,6	1	44	47	55	0.0341	0.225	KHQAMLAEINNHENR	K	V	0.997	70.2	25.9	69.3	3.85	1	0	0	0	2	1804.89			398732	827	841	Empty	true
Fed	Spectrin alpha chain	24329fed_3_722	Tityus2_.fasta	279.318,6	1	44	47	55	0.0341	0.225	KHQAMLAEINNHENRVR	K	A	0.997	0	0	0	3.22	1	0	0	0	2	2076.05			15.064,5	827	843	Empty	true
Fed	Spectrin alpha chain	24329fed_3_722	Tityus2_.fasta	279.318,6	1	44	47	55	0.0341	0.225	KQDLEDSLQAHQYFADANEAESWMK	R	E	0.997	82.1	25	82.1	9.85	1	0	0	0	2	2954.33			778535	885	909	Empty	true
Fed	Spectrin alpha chain	24329fed_3_722	Tityus2_.fasta	279.318,6	1	44	47	55	0.0341	0.225	LCNLHEDHAEQIQNK	R	H	0.997	85.5	25	78.5	7.3	3	0	0	0	2	1848.87			641049	323	337	Empty	true
Fed	Spectrin alpha chain	24329fed_3_722	Tityus2_.fasta	279.318,6	1	44	47	55	0.0341	0.225	LDESYLLHR	R	F	0.997	50.4	28.3	36.5	2.55	1	0	0	0	2	1145.6			423808	359	367	Empty	true
Fed	Spectrin alpha chain	24329fed_3_722	Tityus2_.fasta	279.318,6	1	44	47	55	0.0341	0.225	LIEGQHYAADDVAQR	K	R	0.997	113	26.1	108	7.74	1	0	0	0	2	1685.82			2175460	535	549	Empty	true
Fed	Spectrin alpha chain	24329fed_3_722	Tityus2_.fasta	279.318,6	1	44	47	55	0.0341	0.225	LIEGQHYAADDVAQRR	K	A	0.997	65	25.7	55.7	3.7	2	0	0	0	2	1841.93			3058220	535	550	Empty	true
Fed	Spectrin alpha chain	24329fed_3_722	Tityus2_.fasta	279.318,6	1	44	47	55	0.0341	0.225	LKALTLLRQEK	R	L	0.997	0	0	0	5.21	1	0	0	0	2	1312.83			264802	242	252	Empty	true
Fed	Spectrin alpha chain	24329fed_3_722	Tityus2_.fasta	279.318,6	1	44	47	55	0.0341	0.225	LLVLNNEK	K	Q	0.958	52.2	26.7	26.1	0	1	0	0	0	2	9425619			933902	444	451	Empty	true
Fed	Spectrin alpha chain	24329fed_3_722	Tityus2_.fasta	279.318,6	1	44	47	55	0.0341	0.225	LLVLNNEKQSLLSMWEER	K	R	0.997	136	25	132	13.1	1	0	0	0	2	2202.16			181693	444	461	Empty	true
Fed	Spectrin alpha chain	24329fed_3_722	Tityus2_.fasta	279.318,6	1	44	47	55	0.0341	0.225	LQAASDESYKDPTNLQAK	K	I	0.997	99.9	25	96.9	6.42	1	0	0	0	2	1978.97			2831260	66	83	Empty	true
Fed	Spectrin alpha chain	24329fed_3_722	Tityus2_.fasta	279.318,6	1	44	47	55	0.0341	0.225	LQQFERDCDETKGWISEK	R	L	0.997	0	0	0	4.21	1	0	0	0	2	2269.06			1907610	577	594	Empty	true
Fed	Spectrin alpha chain	24329fed_3_722	Tityus2_.fasta	279.318,6	1	44	47	55	0.0341	0.225	LSEASAQQQFNR	K	G	0.997	97.4	27.7	95.2	5.6	1	0	0	0	2	1378.67			1373620	676	687	Empty	true
Fed	Spectrin alpha chain	24329fed_3_722	Tityus2_.fasta	279.318,6	1	44	47	55	0.0341	0.225	MVEIVELWQSLVEATER	R	K	0.997	73.8	25	71.5	8.92	3	0	0	0	2	2032.04			683626	655	671	Empty	true
Fed	Spectrin alpha chain	24329fed_3_722	Tityus2_.fasta	279.318,6	1	44	47	55	0.0341	0.225	MVEIVELWQSLVEATERK	R	G	0.997	118	25	118	9.77	1	0	0	0	2	2160.14			332088	655	672	Empty	true
Fed	Spectrin alpha chain	24329fed_3_722	Tityus2_.fasta	279.318,6	1	44	47	55	0.0341	0.225	QEAFLANEDLGDSLDSVEALIK	K	K	0.997	32.4	25	32.4	5.92	1	0	0	0	2	2377.18			105583	488	509	Empty	true
Fed	Spectrin alpha chain	24329fed_3_722	Tityus2_.fasta	279.318,6	1	44	47	55	0.0341	0.225	QHALVERYDGLQQPMATR	K	H	0.997	28.4	25.1	28.4	0.824	1	0	0	0	2	2113.06			752129	761	778	Empty	true
Fed	Spectrin alpha chain	24329fed_3_722	Tityus2_.fasta	279.318,6	1	44	47	55	0.0341	0.225	QQEAPVIDHAGKEFVMALYDYTETSPR	R	E	0.997	37.8	25	37.8	5.72	1	0	0	0	2	3095.48			254575	960	986	Empty	true
Fed	Spectrin alpha chain	24329fed_3_722	Tityus2_.fasta	279.318,6	1	44	47	55	0.0341	0.225	QSEINEEWTQLTAKANARKE	K	K	0.98	0	0	0	1.37	1	0	0	0	1	2346.17			1369100	1260	1279	Empty	true
Fed	Spectrin alpha chain	24329fed_3_722	Tityus2_.fasta	279.318,6	1	44	47	55	0.0341	0.225	QSLLSMWEERR	K	I	0.997	103	27.4	80.4	4.64	1	0	0	0	2	1434.72			663354	452	462	Empty	true
Fed	Spectrin alpha chain	24329fed_3_722	Tityus2_.fasta	279.318,6	1	44	47	55	0.0341	0.225	RKEELNDAWQR	K	L	0.997	0	0	0	3.8	1	0	0	0	2	1444.73			577349	231	241	Empty	true
Fed	Spectrin alpha chain	24329fed_3_722	Tityus2_.fasta	279.318,6	1	44	47	55	0.0341	0.225	SRIDEITSTGQELIDSNHYASER	K	I	0.997	89.3	25	89.3	11.4	1	0	0	0	2	2621.24			738583	628	650	Empty	true
Fed	Spectrin alpha chain	24329fed_3_722	Tityus2_.fasta	279.318,6	1	44	47	55	0.0341	0.225	TIISADELAK	K	D	0.991	43.8	29.2	31.3	0	1	0	0	0	2	1060.59			2274360	384	393	Empty	true
Fed	Spectrin alpha chain	24329fed_3_722	Tityus2_.fasta	279.318,6	1	44	47	55	0.0341	0.225	TIISADELAKDVAGAEALLER	K	H	0.997	149	25	149	10.2	1	0	0	0	2	2185.17			409039	384	404	Empty	true
Fed	Spectrin alpha chain	24329fed_3_722	Tityus2_.fasta	279.318,6	1	44	47	55	0.0341	0.225	VQGLNDKWQQLK	R	D	0.997	100	25.8	87.8	2.89	1	0	0	0	2	1456.79			1488400	867	878	Empty	true
Fed	Spectrin alpha chain	24329fed_3_722	Tityus2_.fasta	279.318,6	1	44	47	55	0.0341	0.225	VQGLNDKWQQLKDK	R	A	0.986	0	0	0	2.01	2	0	0	0	2	1699.91			2715910	867	880	Empty	true
Fed	Spectrin alpha chain	24329fed_3_722	Tityus2_.fasta	279.318,6	1	44	47	55	0.0341	0.225	VQQLYRDIEDEEAWIR	R	E	0.997	127	25	123	10.2	1	0	0	0	2	2063.02			526833	788	803	Empty	true
Fed	Spectrin alpha chain	24329fed_3_722	Tityus2_.fasta	279.318,6	1	44	47	55	0.0341	0.225	VQQLYRDIEDEEAWIREKEPIAASTNR	R	G	0.997	0	0	0	6.21	1	0	0	0	2	3259.63			766354	788	814	Empty	true
Fed	Spectrin alpha chain	24329fed_3_722	Tityus2_.fasta	279.318,6	1	44	47	55	0.0341	0.225	VTEVNEQADKLINEDHPEKETILK	R	R	0.997	0	0	0	14.7	1	0	0	0	2	2792.43			1358950	207	230	Empty	true
Fed	Spectrin alpha chain	24329fed_3_722	Tityus2_.fasta	279.318,6	1	44	47	55	0.0341	0.225	YDGLQQPMATR	R	H	0.997	45.7	27.6	38.9	4.41	1	0	0	0	2	1279.61			879287	768	778	Empty	true
Fed	Leukocyte elastase inhibitor	04196fasting_3_16784	Tityus2_.fasta	50.481,1	1	8	9	9	0.00558	0.27	AGVSDLFGNNADLSGITGKDNLYVSEVIHK	K	A	0.997	168	25	168	21.6	1	0	0	0	2	3133.58			305697	354	383	Empty	true
Fed	Leukocyte elastase inhibitor	04196fasting_3_16784	Tityus2_.fasta	50.481,1	1	8	9	9	0.00558	0.27	INTRFPFLDDYDR	K	K	0.997	110	25.9	105	3.37	1	0	0	0	2	1671.81			693368	269	281	Empty	true
Fed	Leukocyte elastase inhibitor	04196fasting_3_16784	Tityus2_.fasta	50.481,1	1	8	9	9	0.00558	0.27	ISPEVELK	R	S	0.997	52.6	28.1	29	2.02	1	0	0	0	2	9145194			794369	64	71	Empty	true
Fed	Leukocyte elastase inhibitor	04196fasting_3_16784	Tityus2_.fasta	50.481,1	1	8	9	9	0.00558	0.27	LKNEITDNIITTFLK	R	E	0.997	38.8	25	26.2	3.74	1	0	0	0	2	1763			289702	311	325	Empty	true
Fed	Leukocyte elastase inhibitor	04196fasting_3_16784	Tityus2_.fasta	50.481,1	1	8	9	9	0.00558	0.27	LKNEITDNIITTFLKELDVTR	R	V	0.997	0	0	0	7.85	1	0	0	0	2	2476.37			367873	311	331	Empty	true
Fed	Leukocyte elastase inhibitor	04196fasting_3_16784	Tityus2_.fasta	50.481,1	1	8	9	9	0.00558	0.27	SNALQELNSWVSEK	K	T	0.997	121	26.2	114	8.85	1	0	0	0	2	1604.79			341620	196	209	Empty	true
Fed	Leukocyte elastase inhibitor	04196fasting_3_16784	Tityus2_.fasta	50.481,1	1	8	9	9	0.00558	0.27	SVNNVIFGHGLFR	K	N	0.997	63	26.7	63	3.68	1	0	0	0	2	1459.78			568277	75	87	Empty	true
Fed	Leukocyte elastase inhibitor	04196fasting_3_16784	Tityus2_.fasta	50.481,1	1	8	9	9	0.00558	0.27	VLQLPYKGDDISMLLVLPYER	K	D	0.997	69.9	25	69.9	8.64	2	0	0	0	2	2462.34			502490	285	305	Empty	true
Fed	Lysosomal alpha-glucosidase	18167fed_3_10667	Tityus2_.fasta	107.750,2	1	12	12	12	0.00744	0.18	FDGAWIDMNEPSNFYNGQK	K	D	0.97	8.64	36.8	0	1.21	1	0	0	0	2	2233			168926	523	541	Empty	true
Fed	Lysosomal alpha-glucosidase	18167fed_3_10667	Tityus2_.fasta	107.750,2	1	12	12	12	0.00744	0.18	FENPLYVPGGVEPLYTK	R	T	0.997	60.4	25.3	60.4	4.18	1	0	0	0	2	1922.99			506667	549	565	Empty	true
Fed	Lysosomal alpha-glucosidase	18167fed_3_10667	Tityus2_.fasta	107.750,2	1	12	12	12	0.00744	0.18	IPFDVQWNDIDYMIK	K	Q	0.997	110	25.4	110	13.4	1	0	0	0	2	1896.92			254619	406	420	Empty	true
Fed	Lysosomal alpha-glucosidase	18167fed_3_10667	Tityus2_.fasta	107.750,2	1	12	12	12	0.00744	0.18	LNPFNLLVVLDDDR	R	S	0.997	106	25.4	102	4.89	1	0	0	0	2	1642.88			635089	829	842	Empty	true
Fed	Lysosomal alpha-glucosidase	18167fed_3_10667	Tityus2_.fasta	107.750,2	1	12	12	12	0.00744	0.18	LSSPYIYGLGQHK	R	A	0.997	79.5	27.2	71.5	5.26	1	0	0	0	2	1462.77			1401260	262	274	Empty	true
Fed	Lysosomal alpha-glucosidase	18167fed_3_10667	Tityus2_.fasta	107.750,2	1	12	12	12	0.00744	0.18	LVFSDQFLELSSR	R	L	0.997	102	26.6	99.8	4.11	1	0	0	0	2	1540.8			397428	249	261	Empty	true
Fed	Lysosomal alpha-glucosidase	18167fed_3_10667	Tityus2_.fasta	107.750,2	1	12	12	12	0.00744	0.18	LYDVQLNK	K	N	0.974	31.2	28.7	16.5	1.29	1	0	0	0	2	9925412			1104430	219	226	Empty	true
Fed	Lysosomal alpha-glucosidase	18167fed_3_10667	Tityus2_.fasta	107.750,2	1	12	12	12	0.00744	0.18	NHNTDDAIDQDPVSLGPEVVK	R	A	0.997	69	25	69	7.85	1	0	0	0	2	2263.08			2060070	683	703	Empty	true
Fed	Lysosomal alpha-glucosidase	18167fed_3_10667	Tityus2_.fasta	107.750,2	1	12	12	12	0.00744	0.18	RLVFSDQFLELSSR	R	L	0.997	56	25.2	55.6	5.85	1	0	0	0	2	1696.9			260093	248	261	Empty	true
Fed	Lysosomal alpha-glucosidase	18167fed_3_10667	Tityus2_.fasta	107.750,2	1	12	12	12	0.00744	0.18	SIGGILDFFVFLGPKPDAVIR	R	Q	0.997	98.9	25	93	5.18	1	0	0	0	2	2261.27			383691	342	362	Empty	true
Fed	Lysosomal alpha-glucosidase	18167fed_3_10667	Tityus2_.fasta	107.750,2	1	12	12	12	0.00744	0.18	VWNSVSTVFPDFTHPK	K	A	0.997	30.7	25.6	30.7	3.89	1	0	0	0	2	1860.93			303714	490	505	Empty	true
Fed	Lysosomal alpha-glucosidase	18167fed_3_10667	Tityus2_.fasta	107.750,2	1	12	12	12	0.00744	0.18	WSALGAFYPFSR	R	N	0.997	68.2	26.9	60.7	4.57	1	0	0	0	2	1401.69			432986	671	682	Empty	true
Fed	Alpha-2-macroglobulin	23683fed_3_2	Tityus2_.fasta	11.495,4	0.95	1	1	1	0.00062	0.204	YEIKDNQINLYFTQLTDHQK	R	C	0.997	111	25	111	6.7	1	0	0	0	2	2511.25			200834	33	52	Empty	true
Fed	Leucine-rich repeat-containing protein 15	06570fasting_1_815	Tityus2_.fasta	67.023,5	1	11	11	11	0.00682	0.203	IQYLPPQIFK	K	N	0.997	22.2	25.4	17.9	0.796	1	0	0	0	2	1246.72			549750	156	165	Empty	true	24261fed_2_66
Fed	Leucine-rich repeat-containing protein 15	06570fasting_1_815	Tityus2_.fasta	67.023,5	1	11	11	11	0.00682	0.203	ISALPVDLLQSFPNLK	R	V	0.997	124	25	124	5.14	1	0	0	0	2	1755.01			1501350	84	99	Empty	true	24261fed_2_66
Fed	Leucine-rich repeat-containing protein 15	06570fasting_1_815	Tityus2_.fasta	67.023,5	1	11	11	11	0.00682	0.203	ISALPVDLLQSFPNLKVFSINSNR	R	I	0.997	103	25	103	8.21	1	0	0	0	2	2672.48			609512	84	107	Empty	true	24261fed_2_66
Fed	Leucine-rich repeat-containing protein 15	06570fasting_1_815	Tityus2_.fasta	67.023,5	1	11	11	11	0.00682	0.203	ITFLPENIFVPLK	R	E	0.997	39.3	25	27.6	1.08	1	0	0	0	2	1530.89			285178	228	240	Empty	true	24261fed_2_66
Fed	Leucine-rich repeat-containing protein 15	06570fasting_1_815	Tityus2_.fasta	67.023,5	1	11	11	11	0.00682	0.203	ITFLPENIFVPLKELR	R	T	0.997	90	25	90	2.43	1	0	0	0	2	1929.12			1220520	228	243	Empty	true	24261fed_2_66
Fed	Leucine-rich repeat-containing protein 15	06570fasting_1_815	Tityus2_.fasta	67.023,5	1	11	11	11	0.00682	0.203	LPIHTPNPTKFDLSNCK	K	I	0.997	65.9	25.6	65.9	5.44	1	0	0	0	2	1982.02			1568610	305	321	Empty	true	24261fed_2_66
Fed	Leucine-rich repeat-containing protein 15	06570fasting_1_815	Tityus2_.fasta	67.023,5	1	11	11	11	0.00682	0.203	NLEEFRFGFNK	K	I	0.997	42.2	27	35.7	0.921	1	0	0	0	2	1400.7			510514	169	179	Empty	true	24261fed_2_66
Fed	Leucine-rich repeat-containing protein 15	06570fasting_1_815	Tityus2_.fasta	67.023,5	1	11	11	11	0.00682	0.203	TIELSGNEITNFSDKWLFDANK	R	R	0.997	132	25	130	8.96	1	0	0	0	2	2542.25			301190	244	265	Empty	true
Fed	Leucine-rich repeat-containing protein 15	06570fasting_1_815	Tityus2_.fasta	67.023,5	1	11	11	11	0.00682	0.203	TIELSGNEITNFSDKWLFDANKR	R	L	0.997	0	0	0	9.21	1	0	0	0	2	2698.35			191055	244	266	Empty	true
Fed	Leucine-rich repeat-containing protein 15	06570fasting_1_815	Tityus2_.fasta	67.023,5	1	11	11	11	0.00682	0.203	TIYIDDWK	K	Y	0.958	58.4	28	51.4	0	1	0	0	0	2	1053.53			1170040	324	331	Empty	true	24261fed_2_66
Fed	Leucine-rich repeat-containing protein 15	06570fasting_1_815	Tityus2_.fasta	67.023,5	1	11	11	11	0.00682	0.203	YVDLGVNKIQYLPPQIFK	K	N	0.997	119	25	119	11.3	1	0	0	0	2	2135.19			272918	148	165	Empty	true	24261fed_2_66
Fed	Hemocyanin AA6 chain	10337fasting_2_29538,29086fed_2_1376	Tityus2_.fasta	71.794,0	1	23	26	32	0.0198	0.542	CSLHPYTVDELSFPGVSIVNISVNSK	K	T	0.997	70.1	25	70.1	7.01	1	0	0	0	2	2862.43			234629	374	399	Empty	true
Fed	Hemocyanin AA6 chain	10337fasting_2_29538,29086fed_2_1376	Tityus2_.fasta	71.794,0	1	23	26	32	0.0198	0.542	DLSDVDVQDMVR	K	W	0.997	58.2	25.8	54.8	3.03	1	0	0	0	2	1391.65			1577970	258	269	Empty	true
Fed	Hemocyanin AA6 chain	10337fasting_2_29538,29086fed_2_1376	Tityus2_.fasta	71.794,0	1	23	26	32	0.0198	0.542	DSSVTISEVK	R	T	0.997	32.2	29	23	1.31	1	0	0	0	2	1064.55			560245	504	513	Empty	true
Fed	Hemocyanin AA6 chain	10337fasting_2_29538,29086fed_2_1376	Tityus2_.fasta	71.794,0	1	23	26	32	0.0198	0.542	EKLPVSERDDRLK	R	G	0.997	0	0	0	3.48	1	0	0	0	2	1584.87			802958	23	35	Empty	true
Fed	Hemocyanin AA6 chain	10337fasting_2_29538,29086fed_2_1376	Tityus2_.fasta	71.794,0	1	23	26	32	0.0198	0.542	ESELELSHGINFGSDQSVK	K	V	0.997	117	25	117	8.05	1	0	0	0	2	2075.99			1083160	410	428	Empty	true
Fed	Hemocyanin AA6 chain	10337fasting_2_29538,29086fed_2_1376	Tityus2_.fasta	71.794,0	1	23	26	32	0.0198	0.542	FIDNIFQEYK	R	C	0.997	75.1	27.4	60.9	4.8	2	0	0	0	2	1316.65			2453970	364	373	Empty	true
Fed	Hemocyanin AA6 chain	10337fasting_2_29538,29086fed_2_1376	Tityus2_.fasta	71.794,0	1	23	26	32	0.0198	0.542	FIPTETINLANK	R	E	0.997	68.8	26.1	61.6	1.77	1	0	0	0	2	1360.75			2494770	119	130	Empty	true
Fed	Hemocyanin AA6 chain	10337fasting_2_29538,29086fed_2_1376	Tityus2_.fasta	71.794,0	1	23	26	32	0.0198	0.542	FQENPGVMSDTSTSLRDPIFYR	R	W	0.997	132	25	126	13.4	4	0	0	0	2	2560.21			14982700	339	360	Empty	true
Fed	Hemocyanin AA6 chain	10337fasting_2_29538,29086fed_2_1376	Tityus2_.fasta	71.794,0	1	23	26	32	0.0198	0.542	GLTVPPIQEVFPDR	K	F	0.997	54.7	25.6	46.2	1.15	1	0	0	0	2	1567.85			826815	105	118	Empty	true
Fed	Hemocyanin AA6 chain	10337fasting_2_29538,29086fed_2_1376	Tityus2_.fasta	71.794,0	1	23	26	32	0.0198	0.542	GLTVPPIQEVFPDRFIPTETINLANK	K	E	0.997	84.8	25	84.8	8.37	1	0	0	0	2	2909.58			509028	105	130	Empty	true
Fed	Hemocyanin AA6 chain	10337fasting_2_29538,29086fed_2_1376	Tityus2_.fasta	71.794,0	1	23	26	32	0.0198	0.542	GTLFSCFHSR	R	H	0.997	52.7	26.2	52.1	0.921	1	0	0	0	2	1211.56			1815080	43	52	Empty	true
Fed	Hemocyanin AA6 chain	10337fasting_2_29538,29086fed_2_1376	Tityus2_.fasta	71.794,0	1	23	26	32	0.0198	0.542	HLAEATELYVTLYGAKDFDDFIK	R	L	0.997	129	25	129	17	1	0	0	0	2	2659.33			150634	53	75	Empty	true
Fed	Hemocyanin AA6 chain	10337fasting_2_29538,29086fed_2_1376	Tityus2_.fasta	71.794,0	1	23	26	32	0.0198	0.542	ILDAINMHYIVDKDNNK	R	I	0.997	98.7	25.1	96.6	7.04	1	0	0	0	2	2016.02			732698	274	290	Empty	true
Fed	Hemocyanin AA6 chain	10337fasting_2_29538,29086fed_2_1376	Tityus2_.fasta	71.794,0	1	23	26	32	0.0198	0.542	IPLDVEHGTDILGDIIESSDESK	K	N	0.997	93.2	25	92.9	5.89	1	0	0	0	2	2482.22			465186	291	313	Empty	true
Fed	Hemocyanin AA6 chain	10337fasting_2_29538,29086fed_2_1376	Tityus2_.fasta	71.794,0	1	23	26	32	0.0198	0.542	LFIELDKFYATLAAGK	R	T	0.997	146	25	136	9.57	2	0	0	0	2	1799.99			649286	480	495	Empty	true
Fed	Hemocyanin AA6 chain	10337fasting_2_29538,29086fed_2_1376	Tityus2_.fasta	71.794,0	1	23	26	32	0.0198	0.542	MIPFHNFEEPLEGYAPHLTSLVSGLQYASRPEGYSIK	R	D	0.997	161	25	161	12.9	3	0	0	0	2	4194.06			1288980	221	257	Empty	true
Fed	Hemocyanin AA6 chain	10337fasting_2_29538,29086fed_2_1376	Tityus2_.fasta	71.794,0	1	23	26	32	0.0198	0.542	MIPFHNFEEPLEGYAPHLTSLVSGLQYASRPEGYSIKDLSDVDVQDMVR	R	W	0.997	115	25	115	15.3	2	0	0	0	2	5566.69			577703	221	269	Empty	true
Fed	Hemocyanin AA6 chain	10337fasting_2_29538,29086fed_2_1376	Tityus2_.fasta	71.794,0	1	23	26	32	0.0198	0.542	QFVNEGMFVYAVSVAVLHREDCK	R	G	0.997	85.2	25	85	7.92	1	0	0	0	2	2698.31			110383	82	104	Empty	true
Fed	Hemocyanin AA6 chain	10337fasting_2_29538,29086fed_2_1376	Tityus2_.fasta	71.794,0	1	23	26	32	0.0198	0.542	TAAEFLTANMALIDIK	R	I	0.997	135	25.1	134	6.06	1	0	0	0	2	1721.91			197010	607	622	Empty	true
Fed	Hemocyanin AA6 chain	10337fasting_2_29538,29086fed_2_1376	Tityus2_.fasta	71.794,0	1	23	26	32	0.0198	0.542	TPNVVTTLTK	K	E	0.997	79.8	27.7	73.1	4.04	1	0	0	0	2	1073.62			1150240	400	409	Empty	true
Fed	Hemocyanin AA6 chain	10337fasting_2_29538,29086fed_2_1376	Tityus2_.fasta	71.794,0	1	23	26	32	0.0198	0.542	YDELNNKLEPDEQR	K	R	0.997	99.8	25	99.8	8.14	1	0	0	0	2	1762.82			1279790	465	478	Empty	true
Fed	Hemocyanin AA6 chain	10337fasting_2_29538,29086fed_2_1376	Tityus2_.fasta	71.794,0	1	23	26	32	0.0198	0.542	YDELNNKLEPDEQRR	K	L	0.997	0	0	0	9.59	2	0	0	0	2	1918.93			3192650	465	479	Empty	true
Fed	Hemocyanin AA6 chain	10337fasting_2_29538,29086fed_2_1376	Tityus2_.fasta	71.794,0	1	23	26	32	0.0198	0.542	YDSERLSNGLQR	R	M	0.997	61.7	27.3	48.3	2.42	1	0	0	0	2	1437.71			591172	209	220	Empty	true
Fed	N-acetylated-alpha-linked acidic dipeptidase 2	30893fed_1_3802	Tityus2_.fasta	86.661,6	1	2	2	2	0.00124	0.0479	VFIKPDGLPLR	R	S	0.997	70.8	25	65.8	1.25	1	0	0	0	2	1254.76			490392	693	703	Empty	true
Fed	N-acetylated-alpha-linked acidic dipeptidase 2	30893fed_1_3802	Tityus2_.fasta	86.661,6	1	2	2	2	0.00124	0.0479	VQTNNVIGLIEGSEEPDRYVLIGNHR	K	D	0.997	156	25	156	13.6	1	0	0	0	2	2922.51			222823	351	376	Empty	true
Fed	Leucine-rich repeat-containing protein 15	24261fed_2_66	Tityus2_.fasta	55.768,8	1	2	2	2	0.00124	0.24	IQYLPPQIFK	K	N	0.997	22.2	25.4	17.9	0.796	1	0	0	0	2	1246.72			549750	290	299	Empty	false	06570fasting_1_815
Fed	Leucine-rich repeat-containing protein 15	24261fed_2_66	Tityus2_.fasta	55.768,8	1	2	2	2	0.00124	0.24	ISALPVDLLQSFPNLK	R	V	0.997	124	25	124	5.14	1	0	0	0	2	1755.01			1501350	218	233	Empty	false	06570fasting_1_815
Fed	Leucine-rich repeat-containing protein 15	24261fed_2_66	Tityus2_.fasta	55.768,8	1	2	2	2	0.00124	0.24	ISALPVDLLQSFPNLKVFSINSNR	R	I	0.997	103	25	103	8.21	1	0	0	0	2	2672.48			609512	218	241	Empty	false	06570fasting_1_815
Fed	Leucine-rich repeat-containing protein 15	24261fed_2_66	Tityus2_.fasta	55.768,8	1	2	2	2	0.00124	0.24	ITFLPENIFVPLK	R	E	0.997	39.3	25	27.6	1.08	1	0	0	0	2	1530.89			285178	362	374	Empty	false	06570fasting_1_815
Fed	Leucine-rich repeat-containing protein 15	24261fed_2_66	Tityus2_.fasta	55.768,8	1	2	2	2	0.00124	0.24	ITFLPENIFVPLKELR	R	I	0.997	90	25	90	2.43	1	0	0	0	2	1929.12			1220520	362	377	Empty	false	06570fasting_1_815
Fed	Leucine-rich repeat-containing protein 15	24261fed_2_66	Tityus2_.fasta	55.768,8	1	2	2	2	0.00124	0.24	LLQCLDVNQLR	R	N	0.997	76.7	26.8	71	3.96	1	0	0	0	2	1371.74			2124780	64	74	Empty	true
Fed	Leucine-rich repeat-containing protein 15	24261fed_2_66	Tityus2_.fasta	55.768,8	1	2	2	2	0.00124	0.24	LPIHTPNPTKFDLSNCK	K	I	0.997	65.9	25.6	65.9	5.44	1	0	0	0	2	1982.02			1568610	439	455	Empty	false	06570fasting_1_815
Fed	Leucine-rich repeat-containing protein 15	24261fed_2_66	Tityus2_.fasta	55.768,8	1	2	2	2	0.00124	0.24	NLEEFRFGFNK	K	I	0.997	42.2	27	35.7	0.921	1	0	0	0	2	1400.7			510514	303	313	Empty	false	06570fasting_1_815
Fed	Leucine-rich repeat-containing protein 15	24261fed_2_66	Tityus2_.fasta	55.768,8	1	2	2	2	0.00124	0.24	SVVIFGISTTK	K	M	0.997	65.9	25	59.4	2.51	1	0	0	0	2	1151.67			1217730	124	134	Empty	true
Fed	Leucine-rich repeat-containing protein 15	24261fed_2_66	Tityus2_.fasta	55.768,8	1	2	2	2	0.00124	0.24	TIYIDDWK	K	Y	0.958	58.4	28	51.4	0	1	0	0	0	2	1053.53			1170040	458	465	Empty	false	06570fasting_1_815
Fed	Leucine-rich repeat-containing protein 15	24261fed_2_66	Tityus2_.fasta	55.768,8	1	2	2	2	0.00124	0.24	YVDLGVNKIQYLPPQIFK	K	N	0.997	119	25	119	11.3	1	0	0	0	2	2135.19			272918	282	299	Empty	false	06570fasting_1_815
Fed	MAM and LDL-receptor class A domain-containing protein C10orf112	23622fed_2_152	Tityus2_.fasta	580.276,3	1	2	2	2	0.00124	0.0047	IALISSTTFLPTFAK	R	D	0.997	69.2	25	59.6	5.31	1	0	0	0	2	1609.92			105693	3387	3401	Empty	true
Fed	MAM and LDL-receptor class A domain-containing protein C10orf112	23622fed_2_152	Tityus2_.fasta	580.276,3	1	2	2	2	0.00124	0.0047	LLSPFLTSK	R	N	0.994	52.3	34.8	39	0	1	0	0	0	2	1118.68			262382	2554	2562	Empty	true
Fed	Uncharacterized protein C05D11.1	00673fasting_1_11122,29162fed_3_1470	Tityus2_.fasta	116.893,2	1	3	3	3	0.00186	0.0792	GFLPEFVRPWQNPVPPLTESVAK	K	T	0.997	53	25	53	4.36	1	0	0	0	2	2608.39			370806	243	265	Empty	true
Fed	Uncharacterized protein C05D11.1	00673fasting_1_11122,29162fed_3_1470	Tityus2_.fasta	116.893,2	1	3	3	3	0.00186	0.0792	INASDVFK	K	V	0.997	42.8	29.8	35.1	0.854	1	0	0	0	2	8934727			739908	223	230	Empty	true
Fed	Uncharacterized protein C05D11.1	00673fasting_1_11122,29162fed_3_1470	Tityus2_.fasta	116.893,2	1	3	3	3	0.00186	0.0792	LATGEEEFDMKR	K	I	0.997	90.8	25.4	89.3	4.24	2	0	0	0	2	1441.66			2728010	365	376	Empty	false	06551fasting_2_800
Fed	Uncharacterized protein C05D11.1	00673fasting_1_11122,29162fed_3_1470	Tityus2_.fasta	116.893,2	1	3	3	3	0.00186	0.0792	VIMDSASVPLKLR	W	F	0.997	65.9	25	65.9	2.8	1	0	0	0	1	1428.82			154699	562	574	Empty	false	06551fasting_2_800
Fed	Uncharacterized protein C05D11.1	00673fasting_1_11122,29162fed_3_1470	Tityus2_.fasta	116.893,2	1	3	3	3	0.00186	0.0792	VSKQQEHLGEDGLKTKEESLHAAKK	R	T	0.997	0	0	0	2	1	0	0	0	2	2790.47			96.537,5	474	498	Empty	true
Fed	Spectrin beta chain	23944fed_2_40	Tityus2_.fasta	273.127,2	1	4	4	4	0.00248	0.02	LCDEGHFASDKVNK	R	K	0.997	51.1	25	50.9	2.89	1	0	0	0	2	1619.75			43.583,3	1230	1243	Empty	true
Fed	Spectrin beta chain	23944fed_2_40	Tityus2_.fasta	273.127,2	1	4	4	4	0.00248	0.02	LLDALSLYK	R	L	0.997	65.6	25	46.7	1.85	1	0	0	0	2	1035.61			362943	840	848	Empty	true
Fed	Spectrin beta chain	23944fed_2_40	Tityus2_.fasta	273.127,2	1	4	4	4	0.00248	0.02	VAVVNQLAR	R	Q	0.997	73.3	25	60.8	0.921	1	0	0	0	2	9695839			694719	900	908	Empty	true
Fed	Spectrin beta chain	23944fed_2_40	Tityus2_.fasta	273.127,2	1	4	4	4	0.00248	0.02	VDKLYAGLKDLALER	Q	R	0.982	16.9	36.3	10.5	0.854	1	0	0	0	1	1703.97			3175260	1671	1685	Empty	true
Fed	Myosin heavy chain, muscle	01027fasting_2_11482,25375fed_1_21866	Tityus2_.fasta	226.839,1	1	5	5	6	0.00334	0.028	EKEMASLAAKLEDEQSLVAK	K	L	0.997	108	38.7	0	9.55	2	0	0	0	2	2174.14			1801660	1081	1100	Empty	true
Fed	Myosin heavy chain, muscle	01027fasting_2_11482,25375fed_1_21866	Tityus2_.fasta	226.839,1	1	5	5	6	0.00334	0.028	IEELEEELEAERQAR	R	A	0.997	76.3	39.2	14.8	0	1	0	0	0	2	1829.89			615135	1112	1126	Empty	true
Fed	Myosin heavy chain, muscle	01027fasting_2_11482,25375fed_1_21866	Tityus2_.fasta	226.839,1	1	5	5	6	0.00334	0.028	LEDEQSLVAK	K	L	0.997	82.2	28.9	65.8	1.85	1	0	0	0	2	1131.59			421109	1091	1100	Empty	true	03841fasting_3_15996
Fed	Myosin heavy chain, muscle	01027fasting_2_11482,25375fed_1_21866	Tityus2_.fasta	226.839,1	1	5	5	6	0.00334	0.028	NLNDEIAHQDELINK	R	F	0.997	93.1	26	93.1	2.96	1	0	0	0	2	1765.87			1449570	974	988	Empty	true	16487fasting_2_6726
Fed	Myosin heavy chain, muscle	01027fasting_2_11482,25375fed_1_21866	Tityus2_.fasta	226.839,1	1	5	5	6	0.00334	0.028	NLNDEIAHQDELINKFNKEK	R	K	0.997	72.9	39.7	71	0	1	0	0	0	2	2378.23			2534260	974	993	Empty	true
Fed	Cytoplasmic aconitate hydratase	23335fed_2_20673	Tityus2_.fasta	98.907,6	1	21	22	24	0.0134	0.358	AAQGSVNPFQYLLK	M	T	0.997	56.5	39.2	0	5.82	1	0	0	0	1	1577.87			694425	2	15	Empty	true
Fed	Cytoplasmic aconitate hydratase	23335fed_2_20673	Tityus2_.fasta	98.907,6	1	21	22	24	0.0134	0.358	AIIAESYER	K	I	0.997	37	28.2	36.4	1.57	1	0	0	0	2	1051.54			2129600	801	809	Empty	true
Fed	Cytoplasmic aconitate hydratase	23335fed_2_20673	Tityus2_.fasta	98.907,6	1	21	22	24	0.0134	0.358	ANYLASPLLVVAYALAGTVSIDFEKEALGK	R	D	0.997	106	25	106	13.2	1	0	0	0	2	3123.7			88.765,3	555	584	Empty	true
Fed	Cytoplasmic aconitate hydratase	23335fed_2_20673	Tityus2_.fasta	98.907,6	1	21	22	24	0.0134	0.358	ELPSIENITNAR	K	V	0.997	75.8	27.2	58.4	1.15	1	0	0	0	2	1356.71			1808000	662	673	Empty	true
Fed	Cytoplasmic aconitate hydratase	23335fed_2_20673	Tityus2_.fasta	98.907,6	1	21	22	24	0.0134	0.358	FVEFFGPGVSELSIADR	K	A	0.997	69.8	25.3	69.8	8.85	1	0	0	0	2	1869.94			1011080	284	300	Empty	true
Fed	Cytoplasmic aconitate hydratase	23335fed_2_20673	Tityus2_.fasta	98.907,6	1	21	22	24	0.0134	0.358	FVIPGMFK	K	E	0.977	37	27.7	31.8	1.11	1	0	0	0	2	9385169			470463	610	617	Empty	true
Fed	Cytoplasmic aconitate hydratase	23335fed_2_20673	Tityus2_.fasta	98.907,6	1	21	22	24	0.0134	0.358	GPYLLGIK	K	A	0.946	45.3	27.9	45	0	1	0	0	0	2	8605242			1442790	793	800	Empty	true
Fed	Cytoplasmic aconitate hydratase	23335fed_2_20673	Tityus2_.fasta	98.907,6	1	21	22	24	0.0134	0.358	LPPFFDGMTK	K	E	0.997	49.4	27.6	36.7	0.886	1	0	0	0	2	1152.58			467488	652	661	Empty	true
Fed	Cytoplasmic aconitate hydratase	23335fed_2_20673	Tityus2_.fasta	98.907,6	1	21	22	24	0.0134	0.358	MLQFIEAYLR	K	A	0.997	61.3	26.3	54.6	2.54	1	0	0	0	2	1283.68			670828	336	345	Empty	true
Fed	Cytoplasmic aconitate hydratase	23335fed_2_20673	Tityus2_.fasta	98.907,6	1	21	22	24	0.0134	0.358	NMIIIPPGSGIVHQVNLEFLAR	K	V	0.997	59.9	25	34.4	5.68	1	0	0	0	2	2418.33			462770	173	194	Empty	true
Fed	Cytoplasmic aconitate hydratase	23335fed_2_20673	Tityus2_.fasta	98.907,6	1	21	22	24	0.0134	0.358	SCDNFHVKEEDVK	R	N	0.997	72.5	25	72.5	10.7	2	0	0	0	2	1606.72			635099	54	66	Empty	true
Fed	Cytoplasmic aconitate hydratase	23335fed_2_20673	Tityus2_.fasta	98.907,6	1	21	22	24	0.0134	0.358	SLQTDTSGVEVAFKPAR	K	V	0.997	110	26.2	106	7.8	1	0	0	0	2	1805.94			1627720	73	89	Empty	true
Fed	Cytoplasmic aconitate hydratase	23335fed_2_20673	Tityus2_.fasta	98.907,6	1	21	22	24	0.0134	0.358	SNLIGMGIVPLQYLPGQNAESLGLTGR	R	E	0.997	90.3	25	90.3	8.85	1	0	0	0	2	2798.49			173460	813	839	Empty	true
Fed	Cytoplasmic aconitate hydratase	23335fed_2_20673	Tityus2_.fasta	98.907,6	1	21	22	24	0.0134	0.358	STYIKLPPFFDGMTK	K	E	0.997	93.5	25.9	93.5	11	1	0	0	0	2	1744.9			290835	647	661	Empty	true
Fed	Cytoplasmic aconitate hydratase	23335fed_2_20673	Tityus2_.fasta	98.907,6	1	21	22	24	0.0134	0.358	TIHIPSGEEMDIFEAAER	R	Y	0.997	63.2	25	63.2	11.3	1	0	0	0	2	2044.96			1107010	748	765	Empty	true
Fed	Cytoplasmic aconitate hydratase	23335fed_2_20673	Tityus2_.fasta	98.907,6	1	21	22	24	0.0134	0.358	TSMSPGSGVVTYYLNESGVTPYLEK	K	L	0.997	59	25	59	11.8	1	0	0	0	2	2679.29			98.640,5	476	500	Empty	true
Fed	Cytoplasmic aconitate hydratase	23335fed_2_20673	Tityus2_.fasta	98.907,6	1	21	22	24	0.0134	0.358	VILQDFTGVPVVVDFAAMR	R	D	0.997	31.7	25	31.7	2.29	2	0	0	0	2	2093.11			206301	90	108	Empty	true
Fed	Cytoplasmic aconitate hydratase	23335fed_2_20673	Tityus2_.fasta	98.907,6	1	21	22	24	0.0134	0.358	VLINLGDSVTTDHISPAGSIAR	R	N	0.997	143	25	134	4.74	1	0	0	0	2	2236.19			2969730	674	695	Empty	true
Fed	Cytoplasmic aconitate hydratase	23335fed_2_20673	Tityus2_.fasta	98.907,6	1	21	22	24	0.0134	0.358	VLLEAAVR	R	S	0.997	44.3	25.4	26.2	0.77	2	0	0	0	2	8705407			3077190	46	53	Empty	true
Fed	Cytoplasmic aconitate hydratase	23335fed_2_20673	Tityus2_.fasta	98.907,6	1	21	22	24	0.0134	0.358	YQYFDLLALKDPK	K	Y	0.997	37.4	25.4	37.4	1.89	1	0	0	0	2	1613.86			280341	24	36	Empty	true
Fed	Cytoplasmic aconitate hydratase	23335fed_2_20673	Tityus2_.fasta	98.907,6	1	21	22	24	0.0134	0.358	YRLENTPLIILTGK	R	E	0.997	42	25	42	1.62	1	0	0	0	2	1630.95			355860	766	779	Empty	true
Fed	Homogentisate 1,2-dioxygenase	23688fed_1_201	Tityus2_.fasta	52.511,1	1	2	2	2	0.00111	0.0799	GNLFVITEFGR	K	M	0.997	32	27.7	31.9	3	1	0	0	0	2	1252.67			312232	162	172	Empty	true
Fed	Homogentisate 1,2-dioxygenase	23688fed_1_201	Tityus2_.fasta	52.511,1	1	2	2	2	0.00111	0.0799	GQNSPQVCPYGLYAEQLSGTAFTAPR	K	E	0.994	2.39	25	2.39	2.05	1	0	0	0	2	2812.34			182253	29	54	Empty	true
Fed	Uncharacterized protein C3H1.02c	06551fasting_2_800	Tityus2_.fasta	116.414,4	1	28	31	33	0.0184	0.358	EDMKYWQNLLR	K	K	0.997	41.9	27.2	40.7	4.64	1	0	0	0	2	1495.74			298701	432	442	Empty	true
Fed	Uncharacterized protein C3H1.02c	06551fasting_2_800	Tityus2_.fasta	116.414,4	1	28	31	33	0.0184	0.358	EDVTFDPLLQEIPYSFHLDDINTK	K	F	0.997	104	25	104	8.02	1	0	0	0	2	2849.39			627921	532	555	Empty	true
Fed	Uncharacterized protein C3H1.02c	06551fasting_2_800	Tityus2_.fasta	116.414,4	1	28	31	33	0.0184	0.358	EIEECVALEVLHEYLDR	K	T	0.997	112	25	112	7.57	1	0	0	0	2	2117.02			987533	289	305	Empty	true
Fed	Uncharacterized protein C3H1.02c	06551fasting_2_800	Tityus2_.fasta	116.414,4	1	28	31	33	0.0184	0.358	ESSNYNCCSLLK	K	Q	0.997	77.7	25	77.7	6.96	1	0	0	0	2	1474.63			338909	697	708	Empty	true
Fed	Uncharacterized protein C3H1.02c	06551fasting_2_800	Tityus2_.fasta	116.414,4	1	28	31	33	0.0184	0.358	FYLPLFVR	R	L	0.997	34.3	25.4	22.4	0.77	1	0	0	0	2	1054.61			590080	574	581	Empty	true
Fed	Uncharacterized protein C3H1.02c	06551fasting_2_800	Tityus2_.fasta	116.414,4	1	28	31	33	0.0184	0.358	GIQWIHQLLYK	K	T	0.997	73.3	25	62.6	1.92	1	0	0	0	2	1398.79			403346	646	656	Empty	true
Fed	Uncharacterized protein C3H1.02c	06551fasting_2_800	Tityus2_.fasta	116.414,4	1	28	31	33	0.0184	0.358	GPLPEFTRPWQNPVPPLTEPVLK	K	T	0.997	65.6	25	65.6	6.36	1	0	0	0	2	2612.42			1043240	243	265	Empty	true
Fed	Uncharacterized protein C3H1.02c	06551fasting_2_800	Tityus2_.fasta	116.414,4	1	28	31	33	0.0184	0.358	GPLVKEIEECVALEVLHEYLDR	R	T	0.997	175	25	175	22.3	2	0	0	0	2	2611.34			894950	284	305	Empty	true
Fed	Uncharacterized protein C3H1.02c	06551fasting_2_800	Tityus2_.fasta	116.414,4	1	28	31	33	0.0184	0.358	ICICEKEGPIVK	K	C	0.997	80.4	26.8	68.1	3.82	1	0	0	0	2	1445.75			596587	34	45	Empty	true
Fed	Uncharacterized protein C3H1.02c	06551fasting_2_800	Tityus2_.fasta	116.414,4	1	28	31	33	0.0184	0.358	INAADVFK	K	A	0.997	63.5	29.8	43.5	1.19	1	0	0	0	2	8774778			1561230	223	230	Empty	true
Fed	Uncharacterized protein C3H1.02c	06551fasting_2_800	Tityus2_.fasta	116.414,4	1	28	31	33	0.0184	0.358	KYVDNLFNGKEQWDELLFESSR	K	N	0.997	0	0	0	5.24	1	0	0	0	2	2717.32			418182	885	906	Empty	true
Fed	Uncharacterized protein C3H1.02c	06551fasting_2_800	Tityus2_.fasta	116.414,4	1	28	31	33	0.0184	0.358	LATGEEEFDMKR	K	M	0.997	92.8	26.4	81.5	2.92	2	0	0	0	2	1425.67			2689470	364	375	Empty	true	00673fasting_1_11122,29162fed_3_1470
Fed	Uncharacterized protein C3H1.02c	06551fasting_2_800	Tityus2_.fasta	116.414,4	1	28	31	33	0.0184	0.358	LITELPIER	R	N	0.996	47.4	25	38.8	0	1	0	0	0	2	1083.64			2248830	582	590	Empty	true
Fed	Uncharacterized protein C3H1.02c	06551fasting_2_800	Tityus2_.fasta	116.414,4	1	28	31	33	0.0184	0.358	LTNCKEDVTFDPLLQEIPYSFHLDDINTK	R	F	0.997	96.9	25	96.9	10.4	1	0	0	0	2	3465.69			474720	527	555	Empty	true
Fed	Uncharacterized protein C3H1.02c	06551fasting_2_800	Tityus2_.fasta	116.414,4	1	28	31	33	0.0184	0.358	NCLVNEFIDKNEASVAHVSIR	R	S	0.997	157	25	156	11.7	2	0	0	0	2	2415.21			2333900	907	927	Empty	true
Fed	Uncharacterized protein C3H1.02c	06551fasting_2_800	Tityus2_.fasta	116.414,4	1	28	31	33	0.0184	0.358	NGELISYKEVINEMDADLLEK	R	Y	0.997	153	25	153	17.7	1	0	0	0	2	2423.2			251101	591	611	Empty	true
Fed	Uncharacterized protein C3H1.02c	06551fasting_2_800	Tityus2_.fasta	116.414,4	1	28	31	33	0.0184	0.358	NVVENPKIEPFLR	K	H	0.997	66.5	25	66.5	3.01	1	0	0	0	2	1554.86			905361	765	777	Empty	true
Fed	Uncharacterized protein C3H1.02c	06551fasting_2_800	Tityus2_.fasta	116.414,4	1	28	31	33	0.0184	0.358	QFYRPENLCIIITGK	R	I	0.997	60.2	25	25.2	4.32	1	0	0	0	2	1851.98			332304	208	222	Empty	true
Fed	Uncharacterized protein C3H1.02c	06551fasting_2_800	Tityus2_.fasta	116.414,4	1	28	31	33	0.0184	0.358	QKELLGEDGLKAKDELFQAAR	K	K	0.997	0	0	0	3.43	1	0	0	0	2	2359.26			797460	476	496	Empty	true
Fed	Uncharacterized protein C3H1.02c	06551fasting_2_800	Tityus2_.fasta	116.414,4	1	28	31	33	0.0184	0.358	SEVINDYETLCQLK	M	F	0.997	0	0	0	1.96	1	0	0	0	1	1753.83			138120	2	15	Empty	true
Fed	Uncharacterized protein C3H1.02c	06551fasting_2_800	Tityus2_.fasta	116.414,4	1	28	31	33	0.0184	0.358	SLESNPDKVINDLEELR	K	N	0.997	137	25	131	9.7	1	0	0	0	2	1971			919634	719	735	Empty	true
Fed	Uncharacterized protein C3H1.02c	06551fasting_2_800	Tityus2_.fasta	116.414,4	1	28	31	33	0.0184	0.358	SLESNPDKVINDLEELRNMLVQPK	K	N	0.997	142	38.9	0	13.5	2	0	0	0	2	2781.41			2699190	719	742	Empty	true
Fed	Uncharacterized protein C3H1.02c	06551fasting_2_800	Tityus2_.fasta	116.414,4	1	28	31	33	0.0184	0.358	SYYEDVDLDFIRK	K	T	0.997	68.1	25.8	68.1	1.24	1	0	0	0	2	1662.8			634409	931	943	Empty	true
Fed	Uncharacterized protein C3H1.02c	06551fasting_2_800	Tityus2_.fasta	116.414,4	1	28	31	33	0.0184	0.358	TFLNQIFK	K	V	0.997	55.8	26.3	44.8	1.7	1	0	0	0	2	1010.57			530697	944	951	Empty	true
Fed	Uncharacterized protein C3H1.02c	06551fasting_2_800	Tityus2_.fasta	116.414,4	1	28	31	33	0.0184	0.358	VEELVTGFK	K	E	0.997	60.3	28.8	28.8	1.26	1	0	0	0	2	1021.56			1297430	985	993	Empty	true
Fed	Uncharacterized protein C3H1.02c	06551fasting_2_800	Tityus2_.fasta	116.414,4	1	28	31	33	0.0184	0.358	VIMDSASVPLK	K	L	0.997	92.5	28.5	84.3	3.52	1	0	0	0	2	1159.64			1313440	561	571	Empty	true	00673fasting_1_11122,29162fed_3_1470
Fed	Uncharacterized protein C3H1.02c	06551fasting_2_800	Tityus2_.fasta	116.414,4	1	28	31	33	0.0184	0.358	VTIEDLQSVGTK	K	Y	0.997	73.4	27.9	60.8	2.37	1	0	0	0	2	1289.69			1375760	952	963	Empty	true
Fed	Uncharacterized protein C3H1.02c	06551fasting_2_800	Tityus2_.fasta	116.414,4	1	28	31	33	0.0184	0.358	YVDNLFNGKEQWDELLFESSR	K	N	0.997	181	25	181	18.1	2	0	0	0	2	2589.23			715162	886	906	Empty	true
Fed	Zinc finger CCCH-type with G patch domain-containing protein	02385fasting_2_13173	Tityus2_.fasta	59.777,7	0.81	1	1	1	0.000556	0.0135	KDLLTLK	R	S	0.988	69.8	29.5	20	1.7	1	0	0	0	2	8305348			1482330	44	50	Empty	true
Fed	Catalase	06540fasting_3_79	Tityus2_.fasta	62.484,5	1	4	5	6	0.00334	0.14	AAELSGSDPDYSIRDLYNAIR	K	S	0.997	66.8	25	66.8	4.72	1	0	0	0	2	2326.13			999616	283	303	Empty	true	24000fed_2_451
Fed	Catalase	06540fasting_3_79	Tityus2_.fasta	62.484,5	1	4	5	6	0.00334	0.14	FSTVGGESGSADTVRDPR	R	G	0.997	58.1	25	46.2	4.1	2	0	0	0	2	1837.87			4597810	109	126	Empty	true
Fed	Catalase	06540fasting_3_79	Tityus2_.fasta	62.484,5	1	4	5	6	0.00334	0.14	GAGAFGTFVVTHDITK	K	Y	0.997	92.7	26.9	77.9	4.34	1	0	0	0	2	1620.84			716689	74	89	Empty	true
Fed	Catalase	06540fasting_3_79	Tityus2_.fasta	62.484,5	1	4	5	6	0.00334	0.14	GPMLLQDVVYLEEMAHFDRER	R	I	0.997	120	25	120	10.9	2	0	0	0	2	2548.23			743587	44	64	Empty	true
Fed	unknown protein	06549fasting_1_798	Tityus2_.fasta	42.296,1	0.95	1	1	1	0.000556	0.0535	LDLNHFFGGNTPFIYIGEAK	K	K	0.997	78.1	25	78.1	8.8	1	0	0	0	2	2253.13			564099	20	39	Empty	true
Fed	Hemocyanin B chain	10939fasting_3_31133	Tityus2_.fasta	73.668,1	1	17	20	24	0.0134	0.39	DFVNEGLYIYAVAVAILHR	R	K	0.997	110	25	110	9.36	1	0	0	0	2	2163.16			323480	85	103	Empty	true
Fed	Hemocyanin B chain	10939fasting_3_31133	Tityus2_.fasta	73.668,1	1	17	20	24	0.0134	0.39	DFVNEGLYIYAVAVAILHRK	R	D	0.997	101	25	101	10.3	1	0	0	0	2	2291.25			383446	85	104	Empty	true
Fed	Hemocyanin B chain	10939fasting_3_31133	Tityus2_.fasta	73.668,1	1	17	20	24	0.0134	0.39	FDELGNEIEANELRR	K	L	0.997	64	25.9	57.3	2.74	1	0	0	0	2	1804.88			2567920	469	483	Empty	true
Fed	Hemocyanin B chain	10939fasting_3_31133	Tityus2_.fasta	73.668,1	1	17	20	24	0.0134	0.39	FIDDMFQEYKK	R	T	0.997	89.1	26.5	87.7	8.17	2	0	0	0	2	1463.69			2413500	367	377	Empty	true
Fed	Hemocyanin B chain	10939fasting_3_31133	Tityus2_.fasta	73.668,1	1	17	20	24	0.0134	0.39	FVPIETLLK	K	A	0.997	27	25	25.3	1.33	1	0	0	0	2	1059.64			1302270	122	130	Empty	true
Fed	Hemocyanin B chain	10939fasting_3_31133	Tityus2_.fasta	73.668,1	1	17	20	24	0.0134	0.39	GMPFHLFVILTDFTQDFVPDHSHR	K	S	0.997	136	25	136	16	2	0	0	0	2	2856.39			499151	551	574	Empty	true
Fed	Hemocyanin B chain	10939fasting_3_31133	Tityus2_.fasta	73.668,1	1	17	20	24	0.0134	0.39	HVTLPPIQEIFPEK	R	F	0.997	65.3	25	63	11.3	1	0	0	0	2	1647.91			368266	108	121	Empty	true
Fed	Hemocyanin B chain	10939fasting_3_31133	Tityus2_.fasta	73.668,1	1	17	20	24	0.0134	0.39	IFLAPKFDELGNEIEANELR	R	R	0.997	64.2	25	62.3	6.92	1	0	0	0	2	2318.2			383721	463	482	Empty	true
Fed	Hemocyanin B chain	10939fasting_3_31133	Tityus2_.fasta	73.668,1	1	17	20	24	0.0134	0.39	IFLAPKFDELGNEIEANELRR	R	L	0.997	0	0	0	8.28	1	0	0	0	2	2474.3			1135530	463	483	Empty	true
Fed	Hemocyanin B chain	10939fasting_3_31133	Tityus2_.fasta	73.668,1	1	17	20	24	0.0134	0.39	ILDSIHLATVIDK	R	H	0.997	91.3	25	68.6	3.64	1	0	0	0	2	1437.83			441504	277	289	Empty	true
Fed	Hemocyanin B chain	10939fasting_3_31133	Tityus2_.fasta	73.668,1	1	17	20	24	0.0134	0.39	ILDSIHLATVIDKHGK	R	G	0.997	107	25	104	3.74	1	0	0	0	2	1760.01			1716730	277	292	Empty	true
Fed	Hemocyanin B chain	10939fasting_3_31133	Tityus2_.fasta	73.668,1	1	17	20	24	0.0134	0.39	KGELFYYMHQQMCAR	R	Y	0.997	81.4	25	19.4	3.85	3	0	0	0	2	1961.88			5350560	197	211	Empty	false	10353fasting_2_29561,27819fed_3_26963,10961fasting_2_31159,04165fasting_1_16742,10999fasting_2_31207
Fed	Hemocyanin B chain	10939fasting_3_31133	Tityus2_.fasta	73.668,1	1	17	20	24	0.0134	0.39	LASMHDDKEEVIVQSEK	K	T	0.997	108	25.2	98.5	13.6	4	0	0	0	2	1957.95			4842070	134	150	Empty	true
Fed	Hemocyanin B chain	10939fasting_3_31133	Tityus2_.fasta	73.668,1	1	17	20	24	0.0134	0.39	LLPLFQYVPLLTK	R	E	0.997	71.9	25	70.4	3.28	1	0	0	0	2	1544.95			1962070	12	24	Empty	true
Fed	Hemocyanin B chain	10939fasting_3_31133	Tityus2_.fasta	73.668,1	1	17	20	24	0.0134	0.39	LMVELDKFSTELEPGVNTIEHSSR	R	D	0.997	164	25	164	11.1	2	0	0	0	2	2731.36			1757550	484	507	Empty	true
Fed	Hemocyanin B chain	10939fasting_3_31133	Tityus2_.fasta	73.668,1	1	17	20	24	0.0134	0.39	TKESPNVIHTYFKEDTLVVSHGLNFNR	K	S	0.997	0	0	0	21.2	1	0	0	0	2	3145.61			738964	401	427	Empty	true
Fed	Hemocyanin B chain	10939fasting_3_31133	Tityus2_.fasta	73.668,1	1	17	20	24	0.0134	0.39	VAYQHLDHETFTYK	K	I	0.997	94.9	25	94.9	6.51	2	0	0	0	2	1751.84			2747990	433	446	Empty	true
Fed	Hemocyanin B chain	10939fasting_3_31133	Tityus2_.fasta	73.668,1	1	17	20	24	0.0134	0.39	YQTNPGVMSDTATSLRDPIFYR	R	W	0.997	63.6	25	62.9	3.41	1	0	0	0	2	2532.22			1350010	342	363	Empty	true
Fed	Hemocyanin II	10999fasting_2_31207	Tityus2_.fasta	72.662,2	1	20	21	24	0.0134	0.571	ASTKPAGDESPIVVDVK	K	E	0.997	72	25.6	62.9	7.4	2	0	0	0	2	1712.91			4771430	134	150	Empty	true
Fed	Hemocyanin II	10999fasting_2_31207	Tityus2_.fasta	72.662,2	1	20	21	24	0.0134	0.571	ATLPLYTK	K	E	0.997	49.7	27.5	41.6	1.14	1	0	0	0	2	9065296			631974	378	385	Empty	true
Fed	Hemocyanin II	10999fasting_2_31207	Tityus2_.fasta	72.662,2	1	20	21	24	0.0134	0.571	DFDDFVHLAQEAR	K	T	0.997	92.6	25.5	90.6	5.8	1	0	0	0	2	1562.72			421595	71	83	Empty	true
Fed	Hemocyanin II	10999fasting_2_31207	Tityus2_.fasta	72.662,2	1	20	21	24	0.0134	0.571	EQLSFPGVDVVDIR	K	V	0.997	88.4	26.4	76.1	6.72	1	0	0	0	2	1573.82			1611590	386	399	Empty	true
Fed	Hemocyanin II	10999fasting_2_31207	Tityus2_.fasta	72.662,2	1	20	21	24	0.0134	0.571	ETGNIFDPEYNLAYFR	K	E	0.997	83	25	83	7.39	1	0	0	0	2	1948.91			300409	151	166	Empty	true
Fed	Hemocyanin II	10999fasting_2_31207	Tityus2_.fasta	72.662,2	1	20	21	24	0.0134	0.571	EVALDEEHGADILGDLIESSYESK	K	N	0.997	102	25	102	6.82	1	0	0	0	2	2619.23			551476	294	317	Empty	true
Fed	Hemocyanin II	10999fasting_2_31207	Tityus2_.fasta	72.662,2	1	20	21	24	0.0134	0.571	EYTFEELER	R	G	0.997	40.8	25	35.7	1.01	1	0	0	0	2	1215.55			740341	516	524	Empty	true
Fed	Hemocyanin II	10999fasting_2_31207	Tityus2_.fasta	72.662,2	1	20	21	24	0.0134	0.571	FIDNIFQDYK	R	A	0.997	46.7	27.5	35.3	3.7	1	0	0	0	2	1302.64			788611	368	377	Empty	false	19977fed_1_12930,02750fasting_2_13777
Fed	Hemocyanin II	10999fasting_2_31207	Tityus2_.fasta	72.662,2	1	20	21	24	0.0134	0.571	FVPAATMAEILSK	R	A	0.997	93.8	27.4	86	3.52	1	0	0	0	2	1377.74			1173190	121	133	Empty	true
Fed	Hemocyanin II	10999fasting_2_31207	Tityus2_.fasta	72.662,2	1	20	21	24	0.0134	0.571	GLSVPPIQQIFPER	K	F	0.997	65.2	25	52.7	1.82	1	0	0	0	2	1580.88			870280	107	120	Empty	true
Fed	Hemocyanin II	10999fasting_2_31207	Tityus2_.fasta	72.662,2	1	20	21	24	0.0134	0.571	HLSLATVGGEVPHEQR	K	D	0.997	72.9	25.4	72.9	10.5	1	0	0	0	2	1729.9			1952300	16	31	Empty	true
Fed	Hemocyanin II	10999fasting_2_31207	Tityus2_.fasta	72.662,2	1	20	21	24	0.0134	0.571	IFLAPKYDELGNVIPPNELRR	R	L	0.997	0	0	0	7.11	1	0	0	0	2	2454.35			524190	463	483	Empty	true
Fed	Hemocyanin II	10999fasting_2_31207	Tityus2_.fasta	72.662,2	1	20	21	24	0.0134	0.571	IIDAIHLGHIEDAHGK	R	E	0.997	68.4	25	68.4	3.46	1	0	0	0	2	1738.92			815746	278	293	Empty	true
Fed	Hemocyanin II	10999fasting_2_31207	Tityus2_.fasta	72.662,2	1	20	21	24	0.0134	0.571	IIDAIHLGHIEDAHGKEVALDEEHGADILGDLIESSYESK	R	N	0.997	64.6	25	64.6	10.5	2	0	0	0	2	4339.14			1051560	278	317	Empty	true
Fed	Hemocyanin II	10999fasting_2_31207	Tityus2_.fasta	72.662,2	1	20	21	24	0.0134	0.571	KGELFYYMHQQMCAR	R	Y	0.997	81.4	25	19.4	3.85	3	0	0	0	2	1961.88			5350560	198	212	Empty	false	10353fasting_2_29561,10939fasting_3_31133,27819fed_3_26963,10961fasting_2_31159,04165fasting_1_16742
Fed	Hemocyanin II	10999fasting_2_31207	Tityus2_.fasta	72.662,2	1	20	21	24	0.0134	0.571	LADLAFSVHPGEIFSCFHPDHLEDAR	R	H	0.997	102	25	102	10.9	1	0	0	0	2	2980.4			456324	35	60	Empty	true
Fed	Hemocyanin II	10999fasting_2_31207	Tityus2_.fasta	72.662,2	1	20	21	24	0.0134	0.571	LCIEMDKFKTELTPGTNTVVR	R	N	0.997	41	40	0	4.32	1	0	0	0	2	2452.22			420318	484	504	Empty	true
Fed	Hemocyanin II	10999fasting_2_31207	Tityus2_.fasta	72.662,2	1	20	21	24	0.0134	0.571	LSDLKDVDVQEMER	K	W	0.997	116	25.9	114	7.05	1	0	0	0	2	1676.82			1131480	260	273	Empty	true
Fed	Hemocyanin II	10999fasting_2_31207	Tityus2_.fasta	72.662,2	1	20	21	24	0.0134	0.571	MVPFHNFDEELEGYAPHLSHLSSGR	R	Y	0.997	75.7	25	75.7	7.89	3	0	0	0	2	2869.34			1394200	225	249	Empty	true
Fed	Hemocyanin II	10999fasting_2_31207	Tityus2_.fasta	72.662,2	1	20	21	24	0.0134	0.571	SMGFPFDRPLPYETVDAFLTTNMHVQEITVK	K	F	0.997	151	25	151	12.1	1	0	0	0	2	3583.76			681343	599	629	Empty	true
Fed	Hemocyanin II	10999fasting_2_31207	Tityus2_.fasta	72.662,2	1	20	21	24	0.0134	0.571	TFVNEGLFAFAAEVAILYRPDCK	R	G	0.997	122	25	94.8	10.5	1	0	0	0	2	2631.33			230281	84	106	Empty	true
Fed	Hemocyanin II	10999fasting_2_31207	Tityus2_.fasta	72.662,2	1	20	21	24	0.0134	0.571	VFYGSLHNMGHVMMA	R	R	0.954	6.23	35.8	0	0.77	1	0	0	0	1	1693.76			331259	320	334	Empty	true
Fed	Myosin heavy chain, muscle	16487fasting_2_6726	Tityus2_.fasta	11.681,5	0.95	1	1	2	0.00111	0.176	NLNDEIAHQDELINK	R	L	0.997	93.1	26	93.1	2.96	1	0	0	0	2	1765.87			1449570	84	98	Empty	false	01027fasting_2_11482,25375fed_1_21866
Fed	Myosin heavy chain, muscle	16487fasting_2_6726	Tityus2_.fasta	11.681,5	0.95	1	1	2	0.00111	0.176	NLNDEIAHQDELINKLNK	R	-	0.997	143	25	143	6.3	2	0	0	0	2	2121.09			3010690	84	101	Empty	true
Fed	Alpha-2-macroglobulin	23683fed_3_2	Tityus2_.fasta	11.495,4	1	2	2	2	0.00111	0.316	LLSISELELKR	K	Y	0.996	68.8	36.7	25.4	0	1	0	0	0	2	1286.77			1160380	22	32	Empty	true
Fed	Alpha-2-macroglobulin	23683fed_3_2	Tityus2_.fasta	11.495,4	1	2	2	2	0.00111	0.316	YEIKDNQINLYFTQLTDHQK	R	C	0.997	92.4	25	92.4	12.6	1	0	0	0	2	2511.25			404595	33	52	Empty	true
Fed	23666fed_2_19-DECOY Calreticulin	23666fed_2_19-DECOY		0,0	1	2	2	3	0.00167	0	QEDKMKREADK	D	T	0.995	0	0	0	1.55	1	0	0	0	1	1360.65			396906	0	0	Empty	true
Fed	23666fed_2_19-DECOY Calreticulin	23666fed_2_19-DECOY		0,0	1	2	2	3	0.00167	0	TSGWTEEGVK	K	Q	0.997	0	0	0	2.17	2	0	0	0	2	1093.52			2091210	0	0	Empty	true
Fed	Calreticulin	23666fed_2_19	Tityus2_.fasta	43.288,8	1	8	8	9	0.00501	0.39	CKDDVYSHLYTLIVKPDNTYVVK	R	I	0.997	9.85	25	9.85	3.38	1	0	0	0	2	2770.41			501252	126	148	Empty	true	06327fasting_1_621
Fed	Calreticulin	23666fed_2_19	Tityus2_.fasta	43.288,8	1	8	8	9	0.00501	0.39	FIDIAAFGFDLWQVK	R	S	0.997	83.5	25.6	83.5	10.3	2	0	0	0	2	1769.93			234570	271	285	Empty	true
Fed	Calreticulin	23666fed_2_19	Tityus2_.fasta	43.288,8	1	8	8	9	0.00501	0.39	FYGDAEKDKGIQTSQDAR	K	F	0.997	0	0	0	12.5	1	0	0	0	2	2028.96			1601720	19	36	Empty	true	06327fasting_1_621
Fed	Calreticulin	23666fed_2_19	Tityus2_.fasta	43.288,8	1	8	8	9	0.00501	0.39	GPWIHPEIDNPEYVPDPFIYR	K	F	0.997	36.2	25	36.2	3.72	1	0	0	0	2	2554.24			281876	250	270	Empty	true
Fed	Calreticulin	23666fed_2_19	Tityus2_.fasta	43.288,8	1	8	8	9	0.00501	0.39	LFDDSLDQK	K	D	0.997	67.3	28.2	38.6	3.21	1	0	0	0	2	1080.52			1015450	75	83	Empty	true	06327fasting_1_621
Fed	Calreticulin	23666fed_2_19	Tityus2_.fasta	43.288,8	1	8	8	9	0.00501	0.39	LFDDSLDQKDLHGETPYLIMFGPDICGPGTK	K	K	0.997	49.8	25	49.8	7.3	1	0	0	0	2	3479.65			309075	75	105	Empty	true	06327fasting_1_621
Fed	Calreticulin	23666fed_2_19	Tityus2_.fasta	43.288,8	1	8	8	9	0.00501	0.39	QVDNPNYKGPWIHPEIDNPEYVPDPFIYR	K	F	0.997	62.1	25	62.1	9.43	1	0	0	0	2	3512.69			592122	242	270	Empty	true
Fed	Calreticulin	23666fed_2_19	Tityus2_.fasta	43.288,8	1	8	8	9	0.00501	0.39	SGTIFDNVLITDDEDFAQKVGEETWGSTK	K	D	0.997	171	25	171	15.2	1	0	0	0	2	3202.51			362472	286	314	Empty	true
Fed	Glycogen debranching enzyme	17971fed_2_10460	Tityus2_.fasta	176.900,0	0.479	1	1	1	0.000556	0.00515	LGISSLIR	R	E	0.946	41.9	28.2	33.5	0	1	0	0	0	2	8585408			977340	585	592	Empty	true
Fed	Myelin expression factor 2	27015fed_2_25323	Tityus2_.fasta	47.590,9	0.95	1	1	1	0.000556	0.0224	VISIELKTDK	K	E	0.997	40.9	25.5	28.1	1.06	1	0	0	0	2	1145.68			2991730	236	245	Empty	true
Fed	Calcium-transporting ATPase sarcoplasmic-endoplasmic reticulum type	26540fed_2_24694	Tityus2_.fasta	109.900,1	0.971	1	1	1	0.000556	0.00799	EFTLEFSR	K	D	0.997	42.2	27	27.6	1.46	1	0	0	0	2	1028.5			670199	483	490	Empty	true	02437fasting_3_13258
Fed	L-like cysteine peptidase 1	33787Fed_cathepsin	Tityus2_.fasta	21.742,8	1	2	2	2	0.00111	0.126	LVSLSEQNLVDCSQK	K	Q	0.997	114	25.6	0	8.89	1	0	0	0	2	1719.86			704003	25	39	Empty	true
Fed	L-like cysteine peptidase 1	33787Fed_cathepsin	Tityus2_.fasta	21.742,8	1	2	2	2	0.00111	0.126	NSWGTSWGIK	K	G	0.997	52.6	28.5	51.7	3.01	1	0	0	0	2	1135.55			347906	165	174	Empty	true
Fed	Ovostatin	06146fasting_1_496	Tityus2_.fasta	75.909,7	1	7	7	7	0.0039	0.15	AFVFVTGDVMGPTLEGLER	R	L	0.997	85.7	25	85.7	10.1	1	0	0	0	2	2038.03			177377	348	366	Empty	true	23681fed_1_2
Fed	Ovostatin	06146fasting_1_496	Tityus2_.fasta	75.909,7	1	7	7	7	0.0039	0.15	FINVDQTELER	K	S	0.997	61	27.8	51.5	3.62	1	0	0	0	2	1363.69			2186890	455	465	Empty	true	23681fed_1_2
Fed	Ovostatin	06146fasting_1_496	Tityus2_.fasta	75.909,7	1	7	7	7	0.0039	0.15	HDQSGSLWLTAFVIR	K	S	0.997	42.1	25.3	42.1	3.1	1	0	0	0	2	1729.9			259848	433	447	Empty	true
Fed	Ovostatin	06146fasting_1_496	Tityus2_.fasta	75.909,7	1	7	7	7	0.0039	0.15	KNQSLKPLGFVDAITAFTK	K	A	0.997	66.3	25	66.3	9.48	1	0	0	0	2	2078.16			178962	30	48	Empty	true	23681fed_1_2
Fed	Ovostatin	06146fasting_1_496	Tityus2_.fasta	75.909,7	1	7	7	7	0.0039	0.15	LLDTAEYVRPYQK	R	T	0.997	85.2	25.8	78	4.62	1	0	0	0	2	1595.84			2524050	8	20	Empty	true
Fed	Ovostatin	06146fasting_1_496	Tityus2_.fasta	75.909,7	1	7	7	7	0.0039	0.15	NQSLKPLGFVDAITAFTK	K	A	0.997	100	25	100	8.62	1	0	0	0	2	1950.07			387074	31	48	Empty	true	23681fed_1_2
Fed	Ovostatin	06146fasting_1_496	Tityus2_.fasta	75.909,7	1	7	7	7	0.0039	0.15	NSYGGFMSTQDTVMAIQALAEYALR	R	I	0.997	99.5	25	99.5	11.6	1	0	0	0	2	2737.3			101622	618	642	Empty	true
Fed	Alpha-2-macroglobulin	23681fed_1_2	Tityus2_.fasta	88.588,8	1	3	3	3	0.00167	0.132	AFVFVTGDVMGPTLEGLER	R	L	0.997	85.7	25	85.7	10.1	1	0	0	0	2	2038.03			177377	607	625	Empty	false	06146fasting_1_496
Fed	Alpha-2-macroglobulin	23681fed_1_2	Tityus2_.fasta	88.588,8	1	3	3	3	0.00167	0.132	FINVDQTELER	K	S	0.997	61	27.8	51.5	3.62	1	0	0	0	2	1363.69			2186890	714	724	Empty	false	06146fasting_1_496
Fed	Alpha-2-macroglobulin	23681fed_1_2	Tityus2_.fasta	88.588,8	1	3	3	3	0.00167	0.132	FSLTQWFSATGHNLQIEPVSSAVECGK	R	L	0.997	218	25	218	23.3	1	0	0	0	2	2993.45			598061	61	87	Empty	true
Fed	Alpha-2-macroglobulin	23681fed_1_2	Tityus2_.fasta	88.588,8	1	3	3	3	0.00167	0.132	KNQSLKPLGFVDAITAFTK	K	A	0.997	66.3	25	66.3	9.48	1	0	0	0	2	2078.16			178962	289	307	Empty	false	06146fasting_1_496
Fed	Alpha-2-macroglobulin	23681fed_1_2	Tityus2_.fasta	88.588,8	1	3	3	3	0.00167	0.132	LAEISVLYTSKGPETR	K	K	0.997	105	25	102	13.2	1	0	0	0	2	1763.95			1765630	88	103	Empty	true
Fed	Alpha-2-macroglobulin	23681fed_1_2	Tityus2_.fasta	88.588,8	1	3	3	3	0.00167	0.132	NQSLKPLGFVDAITAFTK	K	A	0.997	100	25	100	8.62	1	0	0	0	2	1950.07			387074	290	307	Empty	false	06146fasting_1_496
Fed	Alpha-2-macroglobulin	23681fed_1_2	Tityus2_.fasta	88.588,8	1	3	3	3	0.00167	0.132	SVYLLHENDVLTK	K	S	0.997	82.6	26.7	81.3	1.49	1	0	0	0	2	1530.82			1771140	246	258	Empty	true
Fed	Catalase	24000fed_2_451	Tityus2_.fasta	53.914,3	0.95	1	1	1	0.000556	0.0704	AAELSGSDPDYSIRDLYNAIR	K	S	0.997	66.8	25	66.8	4.72	1	0	0	0	2	2326.13			999616	209	229	Empty	false	06540fasting_3_79
Fed	Catalase	24000fed_2_451	Tityus2_.fasta	53.914,3	0.95	1	1	1	0.000556	0.0704	NFTEVDSDFGKR	R	I	0.997	39.8	25.6	39.8	2.89	1	0	0	0	2	1414.66			1442620	440	451	Empty	true
Fed	Ras GTPase-activating protein 3	17523fed_1_10020	Tityus2_.fasta	95.851,0	0.81	1	1	1	0.000556	0.00839	KIVSFLK	R	A	0.988	45	25	0	4.31	1	0	0	0	2	8345448			3364230	347	353	Empty	true
Fed	Fumarylacetoacetase	15148fasting_3_4542	Tityus2_.fasta	50.929,5	0.95	1	1	1	0.000556	0.0417	ASSVVVSGTPIHRPHGQTR	R	A	0.997	28	25	28	2.28	1	0	0	0	2	1986.06			240102	163	181	Empty	true
Fed	Calreticulin	06327fasting_1_621	Tityus2_.fasta	31.059,4	0.999	1	1	1	0.000556	0.318	CKDDVYSHLYTLIVKPDNTYVVK	R	I	0.997	9.85	25	9.85	3.38	1	0	0	0	2	2770.41			501252	163	185	Empty	false	23666fed_2_19
Fed	Calreticulin	06327fasting_1_621	Tityus2_.fasta	31.059,4	0.999	1	1	1	0.000556	0.318	FYGDAEKDKGIQTSQDAR	K	F	0.997	0	0	0	12.5	1	0	0	0	2	2028.96			1601720	56	73	Empty	false	23666fed_2_19
Fed	Calreticulin	06327fasting_1_621	Tityus2_.fasta	31.059,4	0.999	1	1	1	0.000556	0.318	LFDDSLDQK	K	D	0.997	67.3	28.2	38.6	3.21	1	0	0	0	2	1080.52			1015450	112	120	Empty	false	23666fed_2_19
Fed	Calreticulin	06327fasting_1_621	Tityus2_.fasta	31.059,4	0.999	1	1	1	0.000556	0.318	LFDDSLDQKDLHGETPYLIMFGPDICGPGTK	K	K	0.997	49.8	25	49.8	7.3	1	0	0	0	2	3479.65			309075	112	142	Empty	false	23666fed_2_19
Fed	Calreticulin	06327fasting_1_621	Tityus2_.fasta	31.059,4	0.999	1	1	1	0.000556	0.318	WIPSEHKGNELGK	R	F	0.997	55.5	26.6	46.8	2.89	1	0	0	0	2	1494.77			677143	36	48	Empty	true
Fed	Tumor necrosis factor alpha-induced protein 8-like protein	16039fasting_1_5834	Tityus2_.fasta	21.541,8	1	2	2	2	0.00111	0.0745	LNNCRSLLKDLVVR	S	H	0.997	0	0	0	1.77	1	0	0	0	1	1699.96			862654	122	135	Empty	true
Fed	Tumor necrosis factor alpha-induced protein 8-like protein	16039fasting_1_5834	Tityus2_.fasta	21.541,8	1	2	2	2	0.00111	0.0745	SLLKDLVVR	R	H	0.997	45.6	25.7	31.1	1.85	1	0	0	0	2	1042.66			1324830	127	135	Empty	true
Fed	Ubiquitin-like modifier-activating enzyme 1	23984fed_1_440	Tityus2_.fasta	114.800,8	0.95	1	1	1	0.000556	0.0217	NFPNAIEHTLQWARDEFEGLFR	K	Q	0.997	65.9	25	64.2	4.24	1	0	0	0	2	2690.31			177368	595	616	Empty	true
Fed	Filamin-A	06594fasting_3_840	Tityus2_.fasta	237.867,5	1	32	34	38	0.0211	0.2	AGGNAPLNVTIADEEYRPVDLK	K	I	0.997	112	25	112	7.59	2	0	0	0	2	2342.2			8331010	674	695	Empty	true
Fed	Filamin-A	06594fasting_3_840	Tityus2_.fasta	237.867,5	1	32	34	38	0.0211	0.2	AQTPTHFNIDCR	K	D	0.997	79.8	25	79.8	6.62	2	0	0	0	2	1459.67			4390110	758	769	Empty	true
Fed	Filamin-A	06594fasting_3_840	Tityus2_.fasta	237.867,5	1	32	34	38	0.0211	0.2	AVGALVDAVAPGLCPDWPDWTPANALK	R	N	0.997	93.2	25	93.2	13.8	1	0	0	0	2	2804.41			736345	171	197	Empty	true
Fed	Filamin-A	06594fasting_3_840	Tityus2_.fasta	237.867,5	1	32	34	38	0.0211	0.2	DALPVTDVGSQCKLTYKLPGTN	R	A	0.948	0	0	0	0.921	1	0	0	0	1	2377.21			1506870	1699	1720	Empty	true
Fed	Filamin-A	06594fasting_3_840	Tityus2_.fasta	237.867,5	1	32	34	38	0.0211	0.2	EIPNSPIKVTVGSK	K	V	0.997	34.2	25	28.4	0.824	1	0	0	0	2	1468.84			1496890	822	835	Empty	true
Fed	Filamin-A	06594fasting_3_840	Tityus2_.fasta	237.867,5	1	32	34	38	0.0211	0.2	GAGSGGLGLAIEGPSEAK	K	M	0.997	129	39.2	0	0	1	0	0	0	2	1584.82			681553	962	979	Empty	true
Fed	Filamin-A	06594fasting_3_840	Tityus2_.fasta	237.867,5	1	32	34	38	0.0211	0.2	HNVQINYGGVSIPK	K	S	0.997	42	26.2	42	3.07	1	0	0	0	2	1525.81			781517	716	729	Empty	true
Fed	Filamin-A	06594fasting_3_840	Tityus2_.fasta	237.867,5	1	32	34	38	0.0211	0.2	IECNDLGDGSADVK	K	Y	0.997	118	25	118	3.1	1	0	0	0	2	1492.66			570992	594	607	Empty	true
Fed	Filamin-A	06594fasting_3_840	Tityus2_.fasta	237.867,5	1	32	34	38	0.0211	0.2	IKVDGLEPSVFLDSPTDFIVDAR	K	A	0.997	124	25	121	11.6	2	0	0	0	2	2533.32			640155	841	863	Empty	true
Fed	Filamin-A	06594fasting_3_840	Tityus2_.fasta	237.867,5	1	32	34	38	0.0211	0.2	KIADDVHRCEYVAQTVGVHSVN	R	V	0.949	0	0	0	1.04	1	0	0	0	1	2497.23			1608990	410	431	Empty	true
Fed	Filamin-A	06594fasting_3_840	Tityus2_.fasta	237.867,5	1	32	34	38	0.0211	0.2	KIDDTTYECIYRPMK	R	E	0.997	136	25	133	8.89	1	0	0	0	2	1932.92			1051420	507	521	Empty	true
Fed	Filamin-A	06594fasting_3_840	Tityus2_.fasta	237.867,5	1	32	34	38	0.0211	0.2	KIDDTTYECIYRPMKEGR	R	Y	0.997	51.5	38.8	1.79	4.74	1	0	0	0	2	2275.08			1782360	507	524	Empty	true
Fed	Filamin-A	06594fasting_3_840	Tityus2_.fasta	237.867,5	1	32	34	38	0.0211	0.2	KVTASGPGLEPTGVMIGRPTYFDIFTK	K	D	0.997	57.6	25	57.6	7.03	1	0	0	0	2	2882.51			375958	357	383	Empty	true
Fed	Filamin-A	06594fasting_3_840	Tityus2_.fasta	237.867,5	1	32	34	38	0.0211	0.2	LENVSVALK	K	F	0.997	69	28.1	33.6	1.4	1	0	0	0	2	9725724			2859020	77	85	Empty	true
Fed	Filamin-A	06594fasting_3_840	Tityus2_.fasta	237.867,5	1	32	34	38	0.0211	0.2	LIALVEVLSGK	R	K	0.997	70.7	25	63.3	1.19	1	0	0	0	2	1141.72			784395	51	61	Empty	true
Fed	Filamin-A	06594fasting_3_840	Tityus2_.fasta	237.867,5	1	32	34	38	0.0211	0.2	LIALVEVLSGKK	R	L	0.997	89.3	25	81.6	0.921	1	0	0	0	2	1269.81			392307	51	62	Empty	true
Fed	Filamin-A	06594fasting_3_840	Tityus2_.fasta	237.867,5	1	32	34	38	0.0211	0.2	LPDVPINNFTSDWNDGR	K	A	0.997	109	25	106	10.3	2	0	0	0	2	1959.92			1289320	154	170	Empty	true
Fed	Filamin-A	06594fasting_3_840	Tityus2_.fasta	237.867,5	1	32	34	38	0.0211	0.2	NINNLETDLADGLR	K	L	0.997	93.2	26.5	91.9	3.4	1	0	0	0	2	1557.79			1051130	37	50	Empty	true
Fed	Filamin-A	06594fasting_3_840	Tityus2_.fasta	237.867,5	1	32	34	38	0.0211	0.2	SPFEVNVGPFK	R	D	0.997	82.5	28.8	72.2	5.54	1	0	0	0	2	1220.63			450167	539	549	Empty	true
Fed	Filamin-A	06594fasting_3_840	Tityus2_.fasta	237.867,5	1	32	34	38	0.0211	0.2	SPFEVNVGPFKDSK	R	I	0.997	63.4	26.7	63	9.06	1	0	0	0	2	1550.79			1045940	539	552	Empty	true
Fed	Filamin-A	06594fasting_3_840	Tityus2_.fasta	237.867,5	1	32	34	38	0.0211	0.2	SPYIAHILPK	K	T	0.997	31.9	25	25.8	3.21	1	0	0	0	2	1138.66			296174	630	639	Empty	true
Fed	Filamin-A	06594fasting_3_840	Tityus2_.fasta	237.867,5	1	32	34	38	0.0211	0.2	SQKLENVSVALK	I	F	0.997	102	37.6	71.8	7.89	1	0	0	0	1	1315.76			606877	74	85	Empty	true
Fed	Filamin-A	06594fasting_3_840	Tityus2_.fasta	237.867,5	1	32	34	38	0.0211	0.2	TDSLVHSLNDGTYR	R	I	0.997	99.5	25.9	98.2	3.09	1	0	0	0	2	1577.76			2621260	885	898	Empty	true
Fed	Filamin-A	06594fasting_3_840	Tityus2_.fasta	237.867,5	1	32	34	38	0.0211	0.2	TDYFPEKVEAYGPGLQK	K	T	0.997	104	25.5	104	11	1	0	0	0	2	1941.96			3513340	640	656	Empty	true
Fed	Filamin-A	06594fasting_3_840	Tityus2_.fasta	237.867,5	1	32	34	38	0.0211	0.2	TGVVQNQPTEFTIDKR	K	K	0.997	43.5	25	43.5	2.89	1	0	0	0	2	1832.95			7776910	657	672	Empty	true
Fed	Filamin-A	06594fasting_3_840	Tityus2_.fasta	237.867,5	1	32	34	38	0.0211	0.2	VFTENAGDGVLNVK	K	V	0.997	74.6	27.2	67.4	4.2	2	0	0	0	2	1462.75			2543370	479	492	Empty	true
Fed	Filamin-A	06594fasting_3_840	Tityus2_.fasta	237.867,5	1	32	34	38	0.0211	0.2	VIGPGGAPEHVDVR	K	K	0.997	67.9	27.7	67.2	2.92	1	0	0	0	2	1402.74			4416930	493	506	Empty	true
Fed	Filamin-A	06594fasting_3_840	Tityus2_.fasta	237.867,5	1	32	34	38	0.0211	0.2	VIGPGGAPEHVDVRK	K	I	0.997	75	26	72.2	3	1	0	0	0	2	1530.84			290830	493	507	Empty	true
Fed	Filamin-A	06594fasting_3_840	Tityus2_.fasta	237.867,5	1	32	34	38	0.0211	0.2	VQVSEPTDAGKVK	R	V	0.997	89.1	27.1	69.4	3.66	1	0	0	0	2	1357.73			103930	734	746	Empty	true
Fed	Filamin-A	06594fasting_3_840	Tityus2_.fasta	237.867,5	1	32	34	38	0.0211	0.2	VTASGPGLEPTGVMIGRPTYFDIFTK	K	D	0.997	96.5	25	95.4	8.24	2	0	0	0	2	2754.42			1413620	358	383	Empty	true
Fed	Filamin-A	06594fasting_3_840	Tityus2_.fasta	237.867,5	1	32	34	38	0.0211	0.2	VVVENPKGQPVPVEIK	K	F	0.997	60.4	25	60.4	3.89	1	0	0	0	2	1732			1493240	292	307	Empty	true
Fed	Filamin-A	06594fasting_3_840	Tityus2_.fasta	237.867,5	1	32	34	38	0.0211	0.2	YHPTTPGDYAVHILCNNEDIPK	K	S	0.997	112	25	112	9.64	1	0	0	0	2	2554.2			396068	608	629	Empty	true
Fed	unknown protein	05978fasting_2_363	Tityus2_.fasta	75.890,9	0.95	1	1	1	0.000556	0.0293	SLVLDITKLEDIPELYLTAK	K	S	0.997	73.3	25	73.3	5.28	1	0	0	0	2	2274.28			192414	513	532	Empty	true
Fed	Glutathione S-transferase D5	06668fasting_3_9	Tityus2_.fasta	21.792,2	0.95	1	1	1	0.000556	0.0421	FLDGFLEK	K	S	0.997	56.6	27.8	43	2.14	1	0	0	0	2	9685089			493099	140	147	Empty	true	23723fed_1_232
Fed	Transferrin	05774fasting_2_212	Tityus2_.fasta	63.800,4	1	9	9	10	0.00556	0.235	ADLITLDGGDVYSAGR	R	Y	0.997	77.3	26.8	77.3	5.11	1	0	0	0	2	1622.8			1142990	265	280	Empty	true
Fed	Transferrin	05774fasting_2_212	Tityus2_.fasta	63.800,4	1	9	9	10	0.00556	0.235	ADLLFKDLTTSLK	K	A	0.997	104	25	89.6	9.12	2	0	0	0	2	1464.83			741431	522	534	Empty	true
Fed	Transferrin	05774fasting_2_212	Tityus2_.fasta	63.800,4	1	9	9	10	0.00556	0.235	CLAENKGDITFVR	R	H	0.997	60.4	27.3	52.8	6.51	1	0	0	0	2	1522.77			2523080	415	427	Empty	true
Fed	Transferrin	05774fasting_2_212	Tityus2_.fasta	63.800,4	1	9	9	10	0.00556	0.235	CLHDDRGDIAFSK	R	T	0.997	70.8	25.1	60.3	6.25	1	0	0	0	2	1533.71			1255840	68	80	Empty	true	23979fed_3_434
Fed	Transferrin	05774fasting_2_212	Tityus2_.fasta	63.800,4	1	9	9	10	0.00556	0.235	FCTTSEQGVDKCDDLNK	R	M	0.997	120	25	119	13.8	1	0	0	0	2	2016.86			2346650	218	234	Empty	true	23979fed_3_434
Fed	Transferrin	05774fasting_2_212	Tityus2_.fasta	63.800,4	1	9	9	10	0.00556	0.235	HSTPSEYTDGKSEEDWAK	R	N	0.997	87	25	87	11	1	0	0	0	2	2066.89			4091360	428	445	Empty	true
Fed	Transferrin	05774fasting_2_212	Tityus2_.fasta	63.800,4	1	9	9	10	0.00556	0.235	IPQLQNQQPPEWFTK	K	I	0.997	25.9	25.3	25.9	0.77	1	0	0	0	2	1853.95			386057	158	172	Empty	true	23979fed_3_434
Fed	Transferrin	05774fasting_2_212	Tityus2_.fasta	63.800,4	1	9	9	10	0.00556	0.235	NPLDFLGR	R	F	0.997	54.7	30	39.6	3.2	1	0	0	0	2	9314997			992322	192	199	Empty	true	23979fed_3_434
Fed	Transferrin	05774fasting_2_212	Tityus2_.fasta	63.800,4	1	9	9	10	0.00556	0.235	YLQDNPAFADDYEYLCFDNTRK	K	D	0.997	157	25	157	7.7	1	0	0	0	2	2758.21			713335	87	108	Empty	true	23979fed_3_434
Fed	Lysosomal alpha-mannosidase	28760fed_2_1025	Tityus2_.fasta	110.307,3	1	3	4	6	0.00334	0.0355	EALGVAQHHDAISGTAK	R	Q	0.997	98	25.7	95.3	3.42	2	0	0	0	2	1704.87			745596	372	388	Empty	true
Fed	Lysosomal alpha-mannosidase	28760fed_2_1025	Tityus2_.fasta	110.307,3	1	3	4	6	0.00334	0.0355	IPVQLSGYR	R	V	0.991	54.3	28.2	41.8	0	1	0	0	0	2	1032.58			594961	466	474	Empty	true
Fed	Lysosomal alpha-mannosidase	28760fed_2_1025	Tityus2_.fasta	110.307,3	1	3	4	6	0.00334	0.0355	QLTILNDR	L	S	0.977	33.7	37.4	6.4	2.48	3	0	0	0	1	9725474			2768320	735	742	Empty	true
Fed	Spectrin beta chain	23944fed_2_40	Tityus2_.fasta	273.127,2	1	5	5	5	0.00278	0.0256	GNLEVLLFTLQSK	K	M	0.997	86.2	25	83.8	8.26	1	0	0	0	2	1461.83			142347	354	366	Empty	true
Fed	Spectrin beta chain	23944fed_2_40	Tityus2_.fasta	273.127,2	1	5	5	5	0.00278	0.0256	HRPDLIQYDK	K	L	0.997	34.9	27.5	20.1	1.6	1	0	0	0	2	1284.67			198180	209	218	Empty	true
Fed	Spectrin beta chain	23944fed_2_40	Tityus2_.fasta	273.127,2	1	5	5	5	0.00278	0.0256	IQQLEAAYSELVQLALDRR	R	N	0.997	78.2	25	76.2	3.96	1	0	0	0	2	2216.2			869994	608	626	Empty	true
Fed	Spectrin beta chain	23944fed_2_40	Tityus2_.fasta	273.127,2	1	5	5	5	0.00278	0.0256	LLDALSLYK	R	L	0.997	68.8	25	50.8	3.43	1	0	0	0	2	1035.61			374899	840	848	Empty	true
Fed	Spectrin beta chain	23944fed_2_40	Tityus2_.fasta	273.127,2	1	5	5	5	0.00278	0.0256	VAVVNQLAR	R	Q	0.997	65	25	52.4	1.59	1	0	0	0	2	9695839			840085	900	908	Empty	true
Fed	DNA repair protein RAD50	14339fasting_1_3322	Tityus2_.fasta	55.554,5	0.95	1	1	1	0.000556	0.0225	HATNELKGWDR	K	K	0.997	51.8	27.4	42.8	6.08	1	0	0	0	2	1326.65			282252	467	477	Empty	true
Fed	Hemocyanin F chain	10353fasting_2_29561	Tityus2_.fasta	71.568,2	1	18	18	23	0.0128	0.617	AMGFPFDR	R	V	0.997	49.7	27	42.8	2.8	1	0	0	0	2	9404346			820829	592	599	Empty	true	10961fasting_2_31159
Fed	Hemocyanin F chain	10353fasting_2_29561	Tityus2_.fasta	71.568,2	1	18	18	23	0.0128	0.617	ASLHSYDEHDLDFPGVHIEHVTVNAK	K	V	0.997	143	25	143	17.6	2	0	0	0	2	2930.41			3016240	374	399	Empty	true
Fed	Hemocyanin F chain	10353fasting_2_29561	Tityus2_.fasta	71.568,2	1	18	18	23	0.0128	0.617	DATNSSVTISHVPTFDELKEGK	R	G	0.997	105	25	103	7.14	2	0	0	0	2	2375.17			2671800	499	520	Empty	true
Fed	Hemocyanin F chain	10353fasting_2_29561	Tityus2_.fasta	71.568,2	1	18	18	23	0.0128	0.617	DFEDFIHLCEQAR	K	N	0.997	72.6	25	72.6	3.72	1	0	0	0	2	1679.75			752347	69	81	Empty	true
Fed	Hemocyanin F chain	10353fasting_2_29561	Tityus2_.fasta	71.568,2	1	18	18	23	0.0128	0.617	ENPGVMSDTSTSLRDPIFYR	R	L	0.997	69.7	25	69.7	3.77	1	0	0	0	2	2285.09			2370840	341	360	Empty	false	19977fed_1_12930,10337fasting_2_29538,02750fasting_2_13777,27819fed_3_26963,04165fasting_1_16742,29086fed_2_1376
Fed	Hemocyanin F chain	10353fasting_2_29561	Tityus2_.fasta	71.568,2	1	18	18	23	0.0128	0.617	FMDNMFQEYK	R	A	0.997	80.6	25	80.6	8	1	0	0	0	2	1352.57			1378820	364	373	Empty	true
Fed	Hemocyanin F chain	10353fasting_2_29561	Tityus2_.fasta	71.568,2	1	18	18	23	0.0128	0.617	FRENPGVMSDTSTSLRDPIFYR	R	L	0.997	0	0	0	6.37	1	0	0	0	2	2604.25			1273050	339	360	Empty	true
Fed	Hemocyanin F chain	10353fasting_2_29561	Tityus2_.fasta	71.568,2	1	18	18	23	0.0128	0.617	FVPAETINHALK	R	A	0.997	47.9	26.1	47.2	5.14	1	0	0	0	2	1339.74			1533970	119	130	Empty	true
Fed	Hemocyanin F chain	10353fasting_2_29561	Tityus2_.fasta	71.568,2	1	18	18	23	0.0128	0.617	GKLFSCFHADHLAEAETLYTALFQAK	R	D	0.993	7.27	25	7.27	1.23	1	0	0	0	2	2968.47			304235	43	68	Empty	true
Fed	Hemocyanin F chain	10353fasting_2_29561	Tityus2_.fasta	71.568,2	1	18	18	23	0.0128	0.617	GLYIELDKFHK	R	E	0.997	52.3	26.9	47.5	2.34	1	0	0	0	2	1362.74			1065370	477	487	Empty	true
Fed	Hemocyanin F chain	10353fasting_2_29561	Tityus2_.fasta	71.568,2	1	18	18	23	0.0128	0.617	GVSEDNTEFCSCGWPSHMLLPR	K	G	0.997	190	25	190	12.1	1	0	0	0	2	2579.11			739183	521	542	Empty	true
Fed	Hemocyanin F chain	10353fasting_2_29561	Tityus2_.fasta	71.568,2	1	18	18	23	0.0128	0.617	GVTVPPIQEIFPDR	K	F	0.997	70.5	25.6	67.7	2.24	1	0	0	0	2	1567.85			1471330	105	118	Empty	false	19977fed_1_12930,02750fasting_2_13777
Fed	Hemocyanin F chain	10353fasting_2_29561	Tityus2_.fasta	71.568,2	1	18	18	23	0.0128	0.617	GVTVPPIQEIFPDRFVPAETINHALK	K	A	0.997	80.9	25	78.4	4.82	1	0	0	0	2	2888.57			490472	105	130	Empty	true
Fed	Hemocyanin F chain	10353fasting_2_29561	Tityus2_.fasta	71.568,2	1	18	18	23	0.0128	0.617	IFLGPKYDELGNR	R	M	0.997	96.8	26.5	91.8	3.37	1	0	0	0	2	1521.81			3409050	457	469	Empty	false	19977fed_1_12930,02750fasting_2_13777
Fed	Hemocyanin F chain	10353fasting_2_29561	Tityus2_.fasta	71.568,2	1	18	18	23	0.0128	0.617	ILPLFEHLTSLTAK	R	Q	0.997	84.6	25	71.3	7.77	2	0	0	0	2	1582.92			851522	10	23	Empty	true
Fed	Hemocyanin F chain	10353fasting_2_29561	Tityus2_.fasta	71.568,2	1	18	18	23	0.0128	0.617	KGELFYYMHQQMCAR	R	Y	0.997	81.4	25	19.4	3.85	3	0	0	0	2	1961.88			5350560	194	208	Empty	false	10939fasting_3_31133,27819fed_3_26963,10961fasting_2_31159,04165fasting_1_16742,10999fasting_2_31207
Fed	Hemocyanin F chain	10353fasting_2_29561	Tityus2_.fasta	71.568,2	1	18	18	23	0.0128	0.617	MTPFQNFDEALEGYSPHLTSLISGLNYASRPAGLSMHDLNDVNVQEMVR	R	W	0.997	38.1	25	18.4	7.36	1	0	0	0	2	5480.6			88.480,5	221	269	Empty	true
Fed	Hemocyanin F chain	10353fasting_2_29561	Tityus2_.fasta	71.568,2	1	18	18	23	0.0128	0.617	TPSQFATPNMSFTDIR	R	I	0.997	77.9	25	76.7	12.4	1	0	0	0	2	1812.86			995809	605	620	Empty	true
Fed	Hemocyanin F chain	10353fasting_2_29561	Tityus2_.fasta	71.568,2	1	18	18	23	0.0128	0.617	VLDAIHVGHVIDDHGHEIPLDEEHGIDILGSLLESSAESK	R	N	0.997	62.4	25	62.4	9.29	2	0	0	0	2	4296.14			1309730	274	313	Empty	true
Fed	Hemocyanin F chain	10353fasting_2_29561	Tityus2_.fasta	71.568,2	1	18	18	23	0.0128	0.617	VPDVITTTMKEDVLQLSHGIK	K	T	0.997	121	25	118	7.02	2	0	0	0	2	2324.25			746620	400	420	Empty	true
[truncated: 63,803 more rows]
[truncated: 31 more columns]
